# Supplementary material
Source: ML conference proceedings conference paper supplement (https://proceedings.neurips.cc/paper_files/paper/2021/hash/0919b5c38396c3f0c41f1112d538e42c-Abstract.html)
Supplement: Supplementary file 1 [file 0919b5c38396c3f0c41f1112d538e42c-Supplemental.zip]

Archive with 42 entries (32 files):
- supplementary material/
- supplementary material/Appendix.pdf
- supplementary material/ICE/
- supplementary material/ICE/application.R
- supplementary material/ICE/ICE.png
- supplementary material/ICE/methods/
- supplementary material/ICE/methods/ICE.R
- supplementary material/ICE/methods/NS.R
- supplementary material/ICE/methods/Oracle.R
- supplementary material/ICE/methods/USVT.R
- supplementary material/ICE/README.md
- supplementary material/ICE/real_data/
- supplementary material/ICE/real_data/data/
- supplementary material/ICE/real_data/data/A.csv
- supplementary material/ICE/real_data/data/sub-0027055_ses-1_dwi_DS00350.graphml
- supplementary material/ICE/real_data/estimate.R
- supplementary material/ICE/real_data/host_game.R
- supplementary material/ICE/real_data/link_prediction.R
- supplementary material/ICE/real_data/result/
- supplementary material/ICE/real_data/result/home_game.csv
- supplementary material/ICE/real_data/result/link_pre.csv
- supplementary material/ICE/simulation/
- supplementary material/ICE/simulation/data/
- supplementary material/ICE/simulation/data/gp1_A_1.csv
- supplementary material/ICE/simulation/data/gp1_A_2.csv
- supplementary material/ICE/simulation/data/gp1_A_3.csv
- supplementary material/ICE/simulation/data/gp1_P_1.csv
- supplementary material/ICE/simulation/data/gp1_P_2.csv
- supplementary material/ICE/simulation/data/gp1_P_3.csv
- supplementary material/ICE/simulation/network_generate.R
- supplementary material/ICE/simulation/result/
- supplementary material/ICE/simulation/result/home_game.csv
- supplementary material/ICE/simulation/result/link_pre.csv
- supplementary material/ICE/simulation/SAS_SBA/
- supplementary material/ICE/simulation/SAS_SBA/deconvtv.m
- supplementary material/ICE/simulation/SAS_SBA/deconvtvl1.m
- supplementary material/ICE/simulation/SAS_SBA/deconvtvl2.m
- supplementary material/ICE/simulation/SAS_SBA/oracle_h.m
- supplementary material/ICE/simulation/SAS_SBA/simulation_SAS_SBA.m
- supplementary material/ICE/simulation/SAS_SBA/sort_and_smooth.m
- supplementary material/ICE/simulation/SAS_SBA/stochastic_block.m
- supplementary material/ICE/simulation/simulation.R
