# Supplementary material
Source: ML conference proceedings conference paper supplement (https://proceedings.neurips.cc/paper_files/paper/2021/hash/0919b5c38396c3f0c41f1112d538e42c-Abstract.html)
Supplement: Supplementary file 1 [file 0919b5c38396c3f0c41f1112d538e42c-Supplemental.zip › supplementary material/ICE/real_data/data/sub-0027055_ses-1_dwi_DS00350.graphml]

<?xml version='1.0' encoding='utf-8'?>
<graphml xmlns="http://graphml.graphdrawing.org/xmlns" xmlns:xsi="http://www.w3.org/2001/XMLSchema-instance" xsi:schemaLocation="http://graphml.graphdrawing.org/xmlns http://graphml.graphdrawing.org/xmlns/1.0/graphml.xsd">
  <key attr.name="weight" attr.type="int" for="edge" id="d8" />
  <key attr.name="name" attr.type="string" for="graph" id="d7" />
  <key attr.name="sensor" attr.type="string" for="graph" id="d6" />
  <key attr.name="date" attr.type="string" for="graph" id="d5" />
  <key attr.name="version" attr.type="string" for="graph" id="d4" />
  <key attr.name="source" attr.type="string" for="graph" id="d3" />
  <key attr.name="region" attr.type="string" for="graph" id="d2" />
  <key attr.name="vcount" attr.type="int" for="graph" id="d1" />
  <key attr.name="ecount" attr.type="int" for="graph" id="d0" />
  <graph edgedefault="undirected">
    <data key="d0">3772</data>
    <data key="d1">349</data>
    <data key="d2">brain</data>
    <data key="d3">http://m2g.io</data>
    <data key="d4">0.0.48</data>
    <data key="d5">Tue Mar  7 22:03:47 2017</data>
    <data key="d6">Diffusion MRI</data>
    <data key="d7">Generated by NeuroData's MRI Graphs (ndmg)</data>
    <node id="1" />
    <node id="2" />
    <node id="3" />
    <node id="4" />
    <node id="5" />
    <node id="6" />
    <node id="7" />
    <node id="8" />
    <node id="9" />
    <node id="10" />
    <node id="11" />
    <node id="12" />
    <node id="13" />
    <node id="14" />
    <node id="15" />
    <node id="16" />
    <node id="17" />
    <node id="18" />
    <node id="19" />
    <node id="20" />
    <node id="21" />
    <node id="22" />
    <node id="23" />
    <node id="24" />
    <node id="25" />
    <node id="26" />
    <node id="27" />
    <node id="28" />
    <node id="29" />
    <node id="30" />
    <node id="31" />
    <node id="32" />
    <node id="33" />
    <node id="34" />
    <node id="35" />
    <node id="36" />
    <node id="37" />
    <node id="38" />
    <node id="39" />
    <node id="40" />
    <node id="41" />
    <node id="42" />
    <node id="43" />
    <node id="44" />
    <node id="45" />
    <node id="46" />
    <node id="47" />
    <node id="48" />
    <node id="49" />
    <node id="50" />
    <node id="51" />
    <node id="52" />
    <node id="53" />
    <node id="54" />
    <node id="55" />
    <node id="56" />
    <node id="57" />
    <node id="58" />
    <node id="59" />
    <node id="60" />
    <node id="61" />
    <node id="62" />
    <node id="63" />
    <node id="64" />
    <node id="65" />
    <node id="66" />
    <node id="67" />
    <node id="68" />
    <node id="69" />
    <node id="70" />
    <node id="71" />
    <node id="72" />
    <node id="73" />
    <node id="74" />
    <node id="75" />
    <node id="76" />
    <node id="77" />
    <node id="78" />
    <node id="79" />
    <node id="80" />
    <node id="81" />
    <node id="82" />
    <node id="83" />
    <node id="84" />
    <node id="85" />
    <node id="86" />
    <node id="87" />
    <node id="88" />
    <node id="89" />
    <node id="90" />
    <node id="91" />
    <node id="92" />
    <node id="93" />
    <node id="94" />
    <node id="95" />
    <node id="96" />
    <node id="97" />
    <node id="98" />
    <node id="99" />
    <node id="100" />
    <node id="101" />
    <node id="102" />
    <node id="103" />
    <node id="104" />
    <node id="105" />
    <node id="106" />
    <node id="107" />
    <node id="108" />
    <node id="109" />
    <node id="110" />
    <node id="111" />
    <node id="112" />
    <node id="113" />
    <node id="114" />
    <node id="115" />
    <node id="116" />
    <node id="117" />
    <node id="118" />
    <node id="119" />
    <node id="120" />
    <node id="121" />
    <node id="122" />
    <node id="123" />
    <node id="124" />
    <node id="125" />
    <node id="126" />
    <node id="127" />
    <node id="128" />
    <node id="129" />
    <node id="130" />
    <node id="131" />
    <node id="132" />
    <node id="133" />
    <node id="134" />
    <node id="135" />
    <node id="136" />
    <node id="137" />
    <node id="138" />
    <node id="139" />
    <node id="140" />
    <node id="141" />
    <node id="142" />
    <node id="143" />
    <node id="144" />
    <node id="145" />
    <node id="146" />
    <node id="147" />
    <node id="148" />
    <node id="149" />
    <node id="150" />
    <node id="151" />
    <node id="152" />
    <node id="153" />
    <node id="154" />
    <node id="155" />
    <node id="156" />
    <node id="157" />
    <node id="158" />
    <node id="159" />
    <node id="160" />
    <node id="161" />
    <node id="162" />
    <node id="163" />
    <node id="164" />
    <node id="165" />
    <node id="166" />
    <node id="167" />
    <node id="168" />
    <node id="169" />
    <node id="170" />
    <node id="171" />
    <node id="172" />
    <node id="173" />
    <node id="174" />
    <node id="175" />
    <node id="176" />
    <node id="177" />
    <node id="178" />
    <node id="179" />
    <node id="180" />
    <node id="181" />
    <node id="182" />
    <node id="183" />
    <node id="184" />
    <node id="185" />
    <node id="186" />
    <node id="187" />
    <node id="188" />
    <node id="189" />
    <node id="190" />
    <node id="191" />
    <node id="192" />
    <node id="193" />
    <node id="194" />
    <node id="195" />
    <node id="196" />
    <node id="197" />
    <node id="198" />
    <node id="199" />
    <node id="200" />
    <node id="201" />
    <node id="202" />
    <node id="203" />
    <node id="204" />
    <node id="205" />
    <node id="206" />
    <node id="207" />
    <node id="208" />
    <node id="209" />
    <node id="210" />
    <node id="211" />
    <node id="212" />
    <node id="213" />
    <node id="214" />
    <node id="215" />
    <node id="216" />
    <node id="217" />
    <node id="218" />
    <node id="219" />
    <node id="220" />
    <node id="221" />
    <node id="222" />
    <node id="223" />
    <node id="224" />
    <node id="225" />
    <node id="226" />
    <node id="227" />
    <node id="228" />
    <node id="229" />
    <node id="230" />
    <node id="231" />
    <node id="232" />
    <node id="233" />
    <node id="234" />
    <node id="235" />
    <node id="236" />
    <node id="237" />
    <node id="238" />
    <node id="239" />
    <node id="240" />
    <node id="241" />
    <node id="242" />
    <node id="243" />
    <node id="244" />
    <node id="245" />
    <node id="246" />
    <node id="247" />
    <node id="248" />
    <node id="249" />
    <node id="250" />
    <node id="251" />
    <node id="252" />
    <node id="253" />
    <node id="254" />
    <node id="255" />
    <node id="256" />
    <node id="257" />
    <node id="258" />
    <node id="259" />
    <node id="260" />
    <node id="261" />
    <node id="262" />
    <node id="263" />
    <node id="264" />
    <node id="265" />
    <node id="266" />
    <node id="267" />
    <node id="268" />
    <node id="269" />
    <node id="270" />
    <node id="271" />
    <node id="272" />
    <node id="273" />
    <node id="274" />
    <node id="275" />
    <node id="276" />
    <node id="277" />
    <node id="278" />
    <node id="279" />
    <node id="280" />
    <node id="281" />
    <node id="282" />
    <node id="283" />
    <node id="284" />
    <node id="285" />
    <node id="286" />
    <node id="287" />
    <node id="288" />
    <node id="289" />
    <node id="290" />
    <node id="291" />
    <node id="292" />
    <node id="293" />
    <node id="294" />
    <node id="295" />
    <node id="296" />
    <node id="297" />
    <node id="298" />
    <node id="299" />
    <node id="300" />
    <node id="301" />
    <node id="302" />
    <node id="303" />
    <node id="304" />
    <node id="305" />
    <node id="306" />
    <node id="307" />
    <node id="308" />
    <node id="309" />
    <node id="310" />
    <node id="311" />
    <node id="312" />
    <node id="313" />
    <node id="314" />
    <node id="315" />
    <node id="316" />
    <node id="317" />
    <node id="318" />
    <node id="319" />
    <node id="320" />
    <node id="321" />
    <node id="322" />
    <node id="323" />
    <node id="324" />
    <node id="325" />
    <node id="326" />
    <node id="327" />
    <node id="328" />
    <node id="329" />
    <node id="330" />
    <node id="331" />
    <node id="332" />
    <node id="333" />
    <node id="334" />
    <node id="335" />
    <node id="336" />
    <node id="337" />
    <node id="338" />
    <node id="339" />
    <node id="340" />
    <node id="341" />
    <node id="342" />
    <node id="343" />
    <node id="344" />
    <node id="345" />
    <node id="346" />
    <node id="347" />
    <node id="348" />
    <node id="349" />
    <edge source="1" target="98">
      <data key="d8">159</data>
    </edge>
    <edge source="1" target="5">
      <data key="d8">28</data>
    </edge>
    <edge source="1" target="6">
      <data key="d8">1</data>
    </edge>
    <edge source="1" target="44">
      <data key="d8">64</data>
    </edge>
    <edge source="1" target="90">
      <data key="d8">249</data>
    </edge>
    <edge source="1" target="38">
      <data key="d8">57</data>
    </edge>
    <edge source="1" target="37">
      <data key="d8">329</data>
    </edge>
    <edge source="2" target="98">
      <data key="d8">100</data>
    </edge>
    <edge source="2" target="99">
      <data key="d8">1142</data>
    </edge>
    <edge source="2" target="5">
      <data key="d8">4</data>
    </edge>
    <edge source="2" target="38">
      <data key="d8">2171</data>
    </edge>
    <edge source="2" target="39">
      <data key="d8">7</data>
    </edge>
    <edge source="2" target="91">
      <data key="d8">1349</data>
    </edge>
    <edge source="2" target="44">
      <data key="d8">39</data>
    </edge>
    <edge source="2" target="45">
      <data key="d8">498</data>
    </edge>
    <edge source="2" target="50">
      <data key="d8">4</data>
    </edge>
    <edge source="2" target="6">
      <data key="d8">172</data>
    </edge>
    <edge source="2" target="155">
      <data key="d8">5</data>
    </edge>
    <edge source="2" target="90">
      <data key="d8">137</data>
    </edge>
    <edge source="2" target="37">
      <data key="d8">233</data>
    </edge>
    <edge source="4" target="49">
      <data key="d8">4</data>
    </edge>
    <edge source="4" target="50">
      <data key="d8">4</data>
    </edge>
    <edge source="4" target="43">
      <data key="d8">210</data>
    </edge>
    <edge source="4" target="5">
      <data key="d8">8</data>
    </edge>
    <edge source="5" target="99">
      <data key="d8">50</data>
    </edge>
    <edge source="5" target="6">
      <data key="d8">143</data>
    </edge>
    <edge source="5" target="38">
      <data key="d8">14</data>
    </edge>
    <edge source="5" target="39">
      <data key="d8">2</data>
    </edge>
    <edge source="5" target="105">
      <data key="d8">27</data>
    </edge>
    <edge source="5" target="106">
      <data key="d8">10</data>
    </edge>
    <edge source="5" target="43">
      <data key="d8">69</data>
    </edge>
    <edge source="5" target="44">
      <data key="d8">1240</data>
    </edge>
    <edge source="5" target="45">
      <data key="d8">2</data>
    </edge>
    <edge source="5" target="49">
      <data key="d8">24</data>
    </edge>
    <edge source="5" target="50">
      <data key="d8">26</data>
    </edge>
    <edge source="5" target="163">
      <data key="d8">9</data>
    </edge>
    <edge source="5" target="98">
      <data key="d8">466</data>
    </edge>
    <edge source="5" target="90">
      <data key="d8">55</data>
    </edge>
    <edge source="5" target="37">
      <data key="d8">96</data>
    </edge>
    <edge source="6" target="7">
      <data key="d8">12</data>
    </edge>
    <edge source="6" target="163">
      <data key="d8">67</data>
    </edge>
    <edge source="6" target="37">
      <data key="d8">176</data>
    </edge>
    <edge source="6" target="38">
      <data key="d8">558</data>
    </edge>
    <edge source="6" target="39">
      <data key="d8">257</data>
    </edge>
    <edge source="6" target="43">
      <data key="d8">1</data>
    </edge>
    <edge source="6" target="44">
      <data key="d8">803</data>
    </edge>
    <edge source="6" target="45">
      <data key="d8">2966</data>
    </edge>
    <edge source="6" target="46">
      <data key="d8">177</data>
    </edge>
    <edge source="6" target="49">
      <data key="d8">1</data>
    </edge>
    <edge source="6" target="50">
      <data key="d8">35</data>
    </edge>
    <edge source="6" target="51">
      <data key="d8">49</data>
    </edge>
    <edge source="6" target="52">
      <data key="d8">33</data>
    </edge>
    <edge source="6" target="57">
      <data key="d8">5</data>
    </edge>
    <edge source="6" target="90">
      <data key="d8">79</data>
    </edge>
    <edge source="6" target="91">
      <data key="d8">150</data>
    </edge>
    <edge source="6" target="98">
      <data key="d8">380</data>
    </edge>
    <edge source="6" target="99">
      <data key="d8">784</data>
    </edge>
    <edge source="6" target="105">
      <data key="d8">1</data>
    </edge>
    <edge source="7" target="8">
      <data key="d8">7</data>
    </edge>
    <edge source="7" target="52">
      <data key="d8">127</data>
    </edge>
    <edge source="7" target="46">
      <data key="d8">487</data>
    </edge>
    <edge source="7" target="45">
      <data key="d8">2</data>
    </edge>
    <edge source="8" target="47">
      <data key="d8">13</data>
    </edge>
    <edge source="8" target="46">
      <data key="d8">12</data>
    </edge>
    <edge source="20" target="69">
      <data key="d8">16</data>
    </edge>
    <edge source="21" target="80">
      <data key="d8">15</data>
    </edge>
    <edge source="21" target="73">
      <data key="d8">81</data>
    </edge>
    <edge source="21" target="28">
      <data key="d8">82</data>
    </edge>
    <edge source="21" target="22">
      <data key="d8">73</data>
    </edge>
    <edge source="21" target="72">
      <data key="d8">38</data>
    </edge>
    <edge source="22" target="72">
      <data key="d8">21</data>
    </edge>
    <edge source="22" target="73">
      <data key="d8">855</data>
    </edge>
    <edge source="22" target="74">
      <data key="d8">17</data>
    </edge>
    <edge source="22" target="81">
      <data key="d8">44</data>
    </edge>
    <edge source="22" target="82">
      <data key="d8">8</data>
    </edge>
    <edge source="22" target="23">
      <data key="d8">346</data>
    </edge>
    <edge source="22" target="29">
      <data key="d8">984</data>
    </edge>
    <edge source="22" target="30">
      <data key="d8">2</data>
    </edge>
    <edge source="23" target="73">
      <data key="d8">3</data>
    </edge>
    <edge source="23" target="74">
      <data key="d8">42</data>
    </edge>
    <edge source="23" target="82">
      <data key="d8">30</data>
    </edge>
    <edge source="23" target="29">
      <data key="d8">32</data>
    </edge>
    <edge source="23" target="30">
      <data key="d8">139</data>
    </edge>
    <edge source="24" target="32">
      <data key="d8">1</data>
    </edge>
    <edge source="24" target="84">
      <data key="d8">1</data>
    </edge>
    <edge source="24" target="75">
      <data key="d8">7</data>
    </edge>
    <edge source="24" target="76">
      <data key="d8">1</data>
    </edge>
    <edge source="24" target="31">
      <data key="d8">34</data>
    </edge>
    <edge source="25" target="32">
      <data key="d8">391</data>
    </edge>
    <edge source="25" target="33">
      <data key="d8">15</data>
    </edge>
    <edge source="25" target="76">
      <data key="d8">128</data>
    </edge>
    <edge source="25" target="77">
      <data key="d8">18</data>
    </edge>
    <edge source="25" target="84">
      <data key="d8">1</data>
    </edge>
    <edge source="25" target="26">
      <data key="d8">336</data>
    </edge>
    <edge source="26" target="32">
      <data key="d8">362</data>
    </edge>
    <edge source="26" target="33">
      <data key="d8">651</data>
    </edge>
    <edge source="26" target="77">
      <data key="d8">488</data>
    </edge>
    <edge source="26" target="78">
      <data key="d8">3</data>
    </edge>
    <edge source="26" target="85">
      <data key="d8">1</data>
    </edge>
    <edge source="26" target="27">
      <data key="d8">2</data>
    </edge>
    <edge source="28" target="35">
      <data key="d8">104</data>
    </edge>
    <edge source="28" target="36">
      <data key="d8">40</data>
    </edge>
    <edge source="28" target="80">
      <data key="d8">163</data>
    </edge>
    <edge source="28" target="81">
      <data key="d8">175</data>
    </edge>
    <edge source="28" target="88">
      <data key="d8">6</data>
    </edge>
    <edge source="28" target="89">
      <data key="d8">41</data>
    </edge>
    <edge source="28" target="29">
      <data key="d8">209</data>
    </edge>
    <edge source="29" target="36">
      <data key="d8">226</data>
    </edge>
    <edge source="29" target="81">
      <data key="d8">1441</data>
    </edge>
    <edge source="29" target="73">
      <data key="d8">1404</data>
    </edge>
    <edge source="29" target="89">
      <data key="d8">9</data>
    </edge>
    <edge source="29" target="80">
      <data key="d8">6</data>
    </edge>
    <edge source="29" target="145">
      <data key="d8">68</data>
    </edge>
    <edge source="29" target="82">
      <data key="d8">33</data>
    </edge>
    <edge source="29" target="153">
      <data key="d8">5</data>
    </edge>
    <edge source="29" target="30">
      <data key="d8">249</data>
    </edge>
    <edge source="30" target="161">
      <data key="d8">1</data>
    </edge>
    <edge source="30" target="36">
      <data key="d8">46</data>
    </edge>
    <edge source="30" target="37">
      <data key="d8">300</data>
    </edge>
    <edge source="30" target="145">
      <data key="d8">3</data>
    </edge>
    <edge source="30" target="74">
      <data key="d8">21</data>
    </edge>
    <edge source="30" target="215">
      <data key="d8">83</data>
    </edge>
    <edge source="30" target="82">
      <data key="d8">370</data>
    </edge>
    <edge source="30" target="207">
      <data key="d8">94</data>
    </edge>
    <edge source="30" target="208">
      <data key="d8">92</data>
    </edge>
    <edge source="30" target="81">
      <data key="d8">19</data>
    </edge>
    <edge source="30" target="146">
      <data key="d8">200</data>
    </edge>
    <edge source="30" target="83">
      <data key="d8">1</data>
    </edge>
    <edge source="30" target="153">
      <data key="d8">31</data>
    </edge>
    <edge source="30" target="154">
      <data key="d8">229</data>
    </edge>
    <edge source="30" target="31">
      <data key="d8">420</data>
    </edge>
    <edge source="30" target="90">
      <data key="d8">472</data>
    </edge>
    <edge source="30" target="223">
      <data key="d8">1</data>
    </edge>
    <edge source="31" target="264">
      <data key="d8">59</data>
    </edge>
    <edge source="31" target="265">
      <data key="d8">255</data>
    </edge>
    <edge source="31" target="266">
      <data key="d8">274</data>
    </edge>
    <edge source="31" target="267">
      <data key="d8">274</data>
    </edge>
    <edge source="31" target="145">
      <data key="d8">216</data>
    </edge>
    <edge source="31" target="146">
      <data key="d8">714</data>
    </edge>
    <edge source="31" target="148">
      <data key="d8">154</data>
    </edge>
    <edge source="31" target="281">
      <data key="d8">2</data>
    </edge>
    <edge source="31" target="153">
      <data key="d8">143</data>
    </edge>
    <edge source="31" target="154">
      <data key="d8">1173</data>
    </edge>
    <edge source="31" target="156">
      <data key="d8">674</data>
    </edge>
    <edge source="31" target="282">
      <data key="d8">2</data>
    </edge>
    <edge source="31" target="32">
      <data key="d8">7</data>
    </edge>
    <edge source="31" target="161">
      <data key="d8">102</data>
    </edge>
    <edge source="31" target="91">
      <data key="d8">973</data>
    </edge>
    <edge source="31" target="37">
      <data key="d8">277</data>
    </edge>
    <edge source="31" target="38">
      <data key="d8">1027</data>
    </edge>
    <edge source="31" target="308">
      <data key="d8">127</data>
    </edge>
    <edge source="31" target="309">
      <data key="d8">274</data>
    </edge>
    <edge source="31" target="75">
      <data key="d8">3</data>
    </edge>
    <edge source="31" target="207">
      <data key="d8">984</data>
    </edge>
    <edge source="31" target="208">
      <data key="d8">553</data>
    </edge>
    <edge source="31" target="209">
      <data key="d8">97</data>
    </edge>
    <edge source="31" target="82">
      <data key="d8">706</data>
    </edge>
    <edge source="31" target="211">
      <data key="d8">47</data>
    </edge>
    <edge source="31" target="84">
      <data key="d8">36</data>
    </edge>
    <edge source="31" target="215">
      <data key="d8">638</data>
    </edge>
    <edge source="31" target="216">
      <data key="d8">310</data>
    </edge>
    <edge source="31" target="218">
      <data key="d8">444</data>
    </edge>
    <edge source="31" target="219">
      <data key="d8">152</data>
    </edge>
    <edge source="31" target="92">
      <data key="d8">726</data>
    </edge>
    <edge source="31" target="223">
      <data key="d8">102</data>
    </edge>
    <edge source="31" target="226">
      <data key="d8">2</data>
    </edge>
    <edge source="31" target="90">
      <data key="d8">1246</data>
    </edge>
    <edge source="31" target="81">
      <data key="d8">20</data>
    </edge>
    <edge source="31" target="210">
      <data key="d8">517</data>
    </edge>
    <edge source="31" target="83">
      <data key="d8">859</data>
    </edge>
    <edge source="32" target="33">
      <data key="d8">647</data>
    </edge>
    <edge source="32" target="148">
      <data key="d8">44</data>
    </edge>
    <edge source="32" target="39">
      <data key="d8">29</data>
    </edge>
    <edge source="32" target="75">
      <data key="d8">6</data>
    </edge>
    <edge source="32" target="76">
      <data key="d8">107</data>
    </edge>
    <edge source="32" target="77">
      <data key="d8">253</data>
    </edge>
    <edge source="32" target="84">
      <data key="d8">432</data>
    </edge>
    <edge source="32" target="85">
      <data key="d8">369</data>
    </edge>
    <edge source="33" target="34">
      <data key="d8">208</data>
    </edge>
    <edge source="33" target="40">
      <data key="d8">46</data>
    </edge>
    <edge source="33" target="148">
      <data key="d8">48</data>
    </edge>
    <edge source="33" target="77">
      <data key="d8">1351</data>
    </edge>
    <edge source="33" target="78">
      <data key="d8">12</data>
    </edge>
    <edge source="33" target="84">
      <data key="d8">107</data>
    </edge>
    <edge source="33" target="85">
      <data key="d8">1838</data>
    </edge>
    <edge source="33" target="86">
      <data key="d8">35</data>
    </edge>
    <edge source="33" target="93">
      <data key="d8">36</data>
    </edge>
    <edge source="34" target="40">
      <data key="d8">10</data>
    </edge>
    <edge source="34" target="93">
      <data key="d8">4</data>
    </edge>
    <edge source="34" target="85">
      <data key="d8">77</data>
    </edge>
    <edge source="34" target="41">
      <data key="d8">5</data>
    </edge>
    <edge source="35" target="36">
      <data key="d8">147</data>
    </edge>
    <edge source="35" target="80">
      <data key="d8">170</data>
    </edge>
    <edge source="35" target="81">
      <data key="d8">27</data>
    </edge>
    <edge source="35" target="88">
      <data key="d8">318</data>
    </edge>
    <edge source="35" target="89">
      <data key="d8">89</data>
    </edge>
    <edge source="36" target="37">
      <data key="d8">59</data>
    </edge>
    <edge source="36" target="81">
      <data key="d8">100</data>
    </edge>
    <edge source="36" target="43">
      <data key="d8">55</data>
    </edge>
    <edge source="36" target="44">
      <data key="d8">90</data>
    </edge>
    <edge source="36" target="82">
      <data key="d8">9</data>
    </edge>
    <edge source="36" target="80">
      <data key="d8">42</data>
    </edge>
    <edge source="36" target="145">
      <data key="d8">23</data>
    </edge>
    <edge source="36" target="50">
      <data key="d8">4</data>
    </edge>
    <edge source="36" target="88">
      <data key="d8">76</data>
    </edge>
    <edge source="36" target="89">
      <data key="d8">160</data>
    </edge>
    <edge source="37" target="145">
      <data key="d8">108</data>
    </edge>
    <edge source="37" target="146">
      <data key="d8">328</data>
    </edge>
    <edge source="37" target="153">
      <data key="d8">200</data>
    </edge>
    <edge source="37" target="154">
      <data key="d8">984</data>
    </edge>
    <edge source="37" target="156">
      <data key="d8">3</data>
    </edge>
    <edge source="37" target="38">
      <data key="d8">2775</data>
    </edge>
    <edge source="37" target="39">
      <data key="d8">371</data>
    </edge>
    <edge source="37" target="43">
      <data key="d8">196</data>
    </edge>
    <edge source="37" target="44">
      <data key="d8">3395</data>
    </edge>
    <edge source="37" target="45">
      <data key="d8">137</data>
    </edge>
    <edge source="37" target="49">
      <data key="d8">1</data>
    </edge>
    <edge source="37" target="50">
      <data key="d8">384</data>
    </edge>
    <edge source="37" target="207">
      <data key="d8">116</data>
    </edge>
    <edge source="37" target="208">
      <data key="d8">47</data>
    </edge>
    <edge source="37" target="81">
      <data key="d8">4</data>
    </edge>
    <edge source="37" target="82">
      <data key="d8">90</data>
    </edge>
    <edge source="37" target="215">
      <data key="d8">103</data>
    </edge>
    <edge source="37" target="90">
      <data key="d8">4080</data>
    </edge>
    <edge source="37" target="91">
      <data key="d8">363</data>
    </edge>
    <edge source="37" target="92">
      <data key="d8">29</data>
    </edge>
    <edge source="37" target="97">
      <data key="d8">150</data>
    </edge>
    <edge source="37" target="98">
      <data key="d8">733</data>
    </edge>
    <edge source="37" target="99">
      <data key="d8">66</data>
    </edge>
    <edge source="37" target="105">
      <data key="d8">79</data>
    </edge>
    <edge source="37" target="106">
      <data key="d8">8</data>
    </edge>
    <edge source="38" target="265">
      <data key="d8">1</data>
    </edge>
    <edge source="38" target="266">
      <data key="d8">116</data>
    </edge>
    <edge source="38" target="267">
      <data key="d8">116</data>
    </edge>
    <edge source="38" target="145">
      <data key="d8">238</data>
    </edge>
    <edge source="38" target="146">
      <data key="d8">307</data>
    </edge>
    <edge source="38" target="148">
      <data key="d8">193</data>
    </edge>
    <edge source="38" target="281">
      <data key="d8">2</data>
    </edge>
    <edge source="38" target="218">
      <data key="d8">452</data>
    </edge>
    <edge source="38" target="153">
      <data key="d8">415</data>
    </edge>
    <edge source="38" target="154">
      <data key="d8">1204</data>
    </edge>
    <edge source="38" target="155">
      <data key="d8">16</data>
    </edge>
    <edge source="38" target="156">
      <data key="d8">1538</data>
    </edge>
    <edge source="38" target="282">
      <data key="d8">2</data>
    </edge>
    <edge source="38" target="161">
      <data key="d8">3</data>
    </edge>
    <edge source="38" target="219">
      <data key="d8">240</data>
    </edge>
    <edge source="38" target="39">
      <data key="d8">1638</data>
    </edge>
    <edge source="38" target="43">
      <data key="d8">1</data>
    </edge>
    <edge source="38" target="44">
      <data key="d8">277</data>
    </edge>
    <edge source="38" target="45">
      <data key="d8">1688</data>
    </edge>
    <edge source="38" target="46">
      <data key="d8">121</data>
    </edge>
    <edge source="38" target="49">
      <data key="d8">1</data>
    </edge>
    <edge source="38" target="50">
      <data key="d8">57</data>
    </edge>
    <edge source="38" target="51">
      <data key="d8">90</data>
    </edge>
    <edge source="38" target="308">
      <data key="d8">1</data>
    </edge>
    <edge source="38" target="309">
      <data key="d8">116</data>
    </edge>
    <edge source="38" target="52">
      <data key="d8">62</data>
    </edge>
    <edge source="38" target="226">
      <data key="d8">2</data>
    </edge>
    <edge source="38" target="207">
      <data key="d8">345</data>
    </edge>
    <edge source="38" target="208">
      <data key="d8">63</data>
    </edge>
    <edge source="38" target="81">
      <data key="d8">3</data>
    </edge>
    <edge source="38" target="210">
      <data key="d8">556</data>
    </edge>
    <edge source="38" target="211">
      <data key="d8">109</data>
    </edge>
    <edge source="38" target="84">
      <data key="d8">6</data>
    </edge>
    <edge source="38" target="215">
      <data key="d8">276</data>
    </edge>
    <edge source="38" target="216">
      <data key="d8">54</data>
    </edge>
    <edge source="38" target="90">
      <data key="d8">2367</data>
    </edge>
    <edge source="38" target="91">
      <data key="d8">6579</data>
    </edge>
    <edge source="38" target="92">
      <data key="d8">2498</data>
    </edge>
    <edge source="38" target="223">
      <data key="d8">3</data>
    </edge>
    <edge source="38" target="98">
      <data key="d8">212</data>
    </edge>
    <edge source="38" target="99">
      <data key="d8">1621</data>
    </edge>
    <edge source="38" target="105">
      <data key="d8">2</data>
    </edge>
    <edge source="38" target="106">
      <data key="d8">1</data>
    </edge>
    <edge source="38" target="82">
      <data key="d8">34</data>
    </edge>
    <edge source="38" target="83">
      <data key="d8">80</data>
    </edge>
    <edge source="39" target="163">
      <data key="d8">3</data>
    </edge>
    <edge source="39" target="40">
      <data key="d8">26</data>
    </edge>
    <edge source="39" target="44">
      <data key="d8">74</data>
    </edge>
    <edge source="39" target="45">
      <data key="d8">2214</data>
    </edge>
    <edge source="39" target="46">
      <data key="d8">1804</data>
    </edge>
    <edge source="39" target="47">
      <data key="d8">2</data>
    </edge>
    <edge source="39" target="50">
      <data key="d8">23</data>
    </edge>
    <edge source="39" target="51">
      <data key="d8">396</data>
    </edge>
    <edge source="39" target="52">
      <data key="d8">309</data>
    </edge>
    <edge source="39" target="84">
      <data key="d8">2</data>
    </edge>
    <edge source="39" target="90">
      <data key="d8">52</data>
    </edge>
    <edge source="39" target="91">
      <data key="d8">324</data>
    </edge>
    <edge source="39" target="92">
      <data key="d8">155</data>
    </edge>
    <edge source="39" target="93">
      <data key="d8">2</data>
    </edge>
    <edge source="39" target="99">
      <data key="d8">486</data>
    </edge>
    <edge source="39" target="100">
      <data key="d8">4</data>
    </edge>
    <edge source="39" target="106">
      <data key="d8">419</data>
    </edge>
    <edge source="39" target="107">
      <data key="d8">6</data>
    </edge>
    <edge source="40" target="41">
      <data key="d8">89</data>
    </edge>
    <edge source="40" target="84">
      <data key="d8">5</data>
    </edge>
    <edge source="40" target="85">
      <data key="d8">47</data>
    </edge>
    <edge source="40" target="148">
      <data key="d8">5</data>
    </edge>
    <edge source="40" target="93">
      <data key="d8">158</data>
    </edge>
    <edge source="40" target="94">
      <data key="d8">7</data>
    </edge>
    <edge source="41" target="93">
      <data key="d8">65</data>
    </edge>
    <edge source="41" target="94">
      <data key="d8">25</data>
    </edge>
    <edge source="42" target="48">
      <data key="d8">86</data>
    </edge>
    <edge source="42" target="96">
      <data key="d8">1</data>
    </edge>
    <edge source="42" target="43">
      <data key="d8">4</data>
    </edge>
    <edge source="43" target="97">
      <data key="d8">131</data>
    </edge>
    <edge source="43" target="98">
      <data key="d8">181</data>
    </edge>
    <edge source="43" target="105">
      <data key="d8">160</data>
    </edge>
    <edge source="43" target="44">
      <data key="d8">2625</data>
    </edge>
    <edge source="43" target="45">
      <data key="d8">1</data>
    </edge>
    <edge source="43" target="48">
      <data key="d8">8</data>
    </edge>
    <edge source="43" target="49">
      <data key="d8">715</data>
    </edge>
    <edge source="43" target="50">
      <data key="d8">1661</data>
    </edge>
    <edge source="43" target="89">
      <data key="d8">1</data>
    </edge>
    <edge source="43" target="90">
      <data key="d8">90</data>
    </edge>
    <edge source="44" target="163">
      <data key="d8">95</data>
    </edge>
    <edge source="44" target="45">
      <data key="d8">1085</data>
    </edge>
    <edge source="44" target="49">
      <data key="d8">239</data>
    </edge>
    <edge source="44" target="50">
      <data key="d8">3694</data>
    </edge>
    <edge source="44" target="51">
      <data key="d8">116</data>
    </edge>
    <edge source="44" target="54">
      <data key="d8">44</data>
    </edge>
    <edge source="44" target="55">
      <data key="d8">67</data>
    </edge>
    <edge source="44" target="90">
      <data key="d8">329</data>
    </edge>
    <edge source="44" target="91">
      <data key="d8">69</data>
    </edge>
    <edge source="44" target="97">
      <data key="d8">218</data>
    </edge>
    <edge source="44" target="98">
      <data key="d8">2394</data>
    </edge>
    <edge source="44" target="99">
      <data key="d8">424</data>
    </edge>
    <edge source="44" target="105">
      <data key="d8">815</data>
    </edge>
    <edge source="44" target="106">
      <data key="d8">212</data>
    </edge>
    <edge source="45" target="163">
      <data key="d8">63</data>
    </edge>
    <edge source="45" target="46">
      <data key="d8">3908</data>
    </edge>
    <edge source="45" target="47">
      <data key="d8">100</data>
    </edge>
    <edge source="45" target="49">
      <data key="d8">1</data>
    </edge>
    <edge source="45" target="50">
      <data key="d8">75</data>
    </edge>
    <edge source="45" target="51">
      <data key="d8">2282</data>
    </edge>
    <edge source="45" target="52">
      <data key="d8">1374</data>
    </edge>
    <edge source="45" target="57">
      <data key="d8">55</data>
    </edge>
    <edge source="45" target="58">
      <data key="d8">2</data>
    </edge>
    <edge source="45" target="90">
      <data key="d8">49</data>
    </edge>
    <edge source="45" target="91">
      <data key="d8">364</data>
    </edge>
    <edge source="45" target="98">
      <data key="d8">235</data>
    </edge>
    <edge source="45" target="99">
      <data key="d8">3635</data>
    </edge>
    <edge source="45" target="100">
      <data key="d8">46</data>
    </edge>
    <edge source="45" target="105">
      <data key="d8">35</data>
    </edge>
    <edge source="45" target="106">
      <data key="d8">1969</data>
    </edge>
    <edge source="45" target="107">
      <data key="d8">30</data>
    </edge>
    <edge source="46" target="163">
      <data key="d8">3</data>
    </edge>
    <edge source="46" target="47">
      <data key="d8">1133</data>
    </edge>
    <edge source="46" target="50">
      <data key="d8">15</data>
    </edge>
    <edge source="46" target="51">
      <data key="d8">1871</data>
    </edge>
    <edge source="46" target="52">
      <data key="d8">3630</data>
    </edge>
    <edge source="46" target="53">
      <data key="d8">21</data>
    </edge>
    <edge source="46" target="55">
      <data key="d8">15</data>
    </edge>
    <edge source="46" target="56">
      <data key="d8">2</data>
    </edge>
    <edge source="46" target="57">
      <data key="d8">272</data>
    </edge>
    <edge source="46" target="91">
      <data key="d8">67</data>
    </edge>
    <edge source="46" target="92">
      <data key="d8">111</data>
    </edge>
    <edge source="46" target="99">
      <data key="d8">2000</data>
    </edge>
    <edge source="46" target="100">
      <data key="d8">1309</data>
    </edge>
    <edge source="46" target="105">
      <data key="d8">15</data>
    </edge>
    <edge source="46" target="106">
      <data key="d8">1483</data>
    </edge>
    <edge source="46" target="107">
      <data key="d8">22</data>
    </edge>
    <edge source="46" target="108">
      <data key="d8">1</data>
    </edge>
    <edge source="47" target="99">
      <data key="d8">226</data>
    </edge>
    <edge source="47" target="100">
      <data key="d8">195</data>
    </edge>
    <edge source="47" target="101">
      <data key="d8">27</data>
    </edge>
    <edge source="47" target="106">
      <data key="d8">45</data>
    </edge>
    <edge source="47" target="108">
      <data key="d8">3</data>
    </edge>
    <edge source="47" target="51">
      <data key="d8">80</data>
    </edge>
    <edge source="47" target="52">
      <data key="d8">830</data>
    </edge>
    <edge source="47" target="53">
      <data key="d8">116</data>
    </edge>
    <edge source="48" target="96">
      <data key="d8">1</data>
    </edge>
    <edge source="48" target="49">
      <data key="d8">73</data>
    </edge>
    <edge source="48" target="103">
      <data key="d8">43</data>
    </edge>
    <edge source="49" target="97">
      <data key="d8">9</data>
    </edge>
    <edge source="49" target="98">
      <data key="d8">38</data>
    </edge>
    <edge source="49" target="104">
      <data key="d8">332</data>
    </edge>
    <edge source="49" target="105">
      <data key="d8">365</data>
    </edge>
    <edge source="49" target="50">
      <data key="d8">2013</data>
    </edge>
    <edge source="49" target="54">
      <data key="d8">586</data>
    </edge>
    <edge source="50" target="51">
      <data key="d8">336</data>
    </edge>
    <edge source="50" target="52">
      <data key="d8">15</data>
    </edge>
    <edge source="50" target="54">
      <data key="d8">685</data>
    </edge>
    <edge source="50" target="55">
      <data key="d8">1017</data>
    </edge>
    <edge source="50" target="90">
      <data key="d8">10</data>
    </edge>
    <edge source="50" target="91">
      <data key="d8">5</data>
    </edge>
    <edge source="50" target="97">
      <data key="d8">4</data>
    </edge>
    <edge source="50" target="98">
      <data key="d8">426</data>
    </edge>
    <edge source="50" target="99">
      <data key="d8">14</data>
    </edge>
    <edge source="50" target="104">
      <data key="d8">113</data>
    </edge>
    <edge source="50" target="105">
      <data key="d8">1509</data>
    </edge>
    <edge source="50" target="106">
      <data key="d8">487</data>
    </edge>
    <edge source="51" target="98">
      <data key="d8">7</data>
    </edge>
    <edge source="51" target="99">
      <data key="d8">994</data>
    </edge>
    <edge source="51" target="105">
      <data key="d8">26</data>
    </edge>
    <edge source="51" target="106">
      <data key="d8">2892</data>
    </edge>
    <edge source="51" target="52">
      <data key="d8">2874</data>
    </edge>
    <edge source="51" target="53">
      <data key="d8">5</data>
    </edge>
    <edge source="51" target="55">
      <data key="d8">23</data>
    </edge>
    <edge source="51" target="56">
      <data key="d8">327</data>
    </edge>
    <edge source="51" target="57">
      <data key="d8">766</data>
    </edge>
    <edge source="51" target="58">
      <data key="d8">54</data>
    </edge>
    <edge source="51" target="91">
      <data key="d8">7</data>
    </edge>
    <edge source="52" target="163">
      <data key="d8">44</data>
    </edge>
    <edge source="52" target="53">
      <data key="d8">729</data>
    </edge>
    <edge source="52" target="55">
      <data key="d8">15</data>
    </edge>
    <edge source="52" target="56">
      <data key="d8">26</data>
    </edge>
    <edge source="52" target="57">
      <data key="d8">1367</data>
    </edge>
    <edge source="52" target="58">
      <data key="d8">160</data>
    </edge>
    <edge source="52" target="91">
      <data key="d8">2</data>
    </edge>
    <edge source="52" target="99">
      <data key="d8">1692</data>
    </edge>
    <edge source="52" target="100">
      <data key="d8">864</data>
    </edge>
    <edge source="52" target="105">
      <data key="d8">15</data>
    </edge>
    <edge source="52" target="106">
      <data key="d8">1679</data>
    </edge>
    <edge source="52" target="107">
      <data key="d8">697</data>
    </edge>
    <edge source="52" target="108">
      <data key="d8">2</data>
    </edge>
    <edge source="53" target="100">
      <data key="d8">5</data>
    </edge>
    <edge source="53" target="101">
      <data key="d8">8</data>
    </edge>
    <edge source="53" target="107">
      <data key="d8">2</data>
    </edge>
    <edge source="53" target="108">
      <data key="d8">71</data>
    </edge>
    <edge source="53" target="115">
      <data key="d8">2</data>
    </edge>
    <edge source="53" target="58">
      <data key="d8">87</data>
    </edge>
    <edge source="54" target="104">
      <data key="d8">150</data>
    </edge>
    <edge source="54" target="105">
      <data key="d8">196</data>
    </edge>
    <edge source="54" target="111">
      <data key="d8">97</data>
    </edge>
    <edge source="54" target="112">
      <data key="d8">45</data>
    </edge>
    <edge source="54" target="55">
      <data key="d8">596</data>
    </edge>
    <edge source="55" target="105">
      <data key="d8">409</data>
    </edge>
    <edge source="55" target="106">
      <data key="d8">210</data>
    </edge>
    <edge source="55" target="112">
      <data key="d8">905</data>
    </edge>
    <edge source="55" target="113">
      <data key="d8">97</data>
    </edge>
    <edge source="55" target="56">
      <data key="d8">232</data>
    </edge>
    <edge source="56" target="106">
      <data key="d8">250</data>
    </edge>
    <edge source="56" target="113">
      <data key="d8">556</data>
    </edge>
    <edge source="56" target="57">
      <data key="d8">1583</data>
    </edge>
    <edge source="57" target="99">
      <data key="d8">2</data>
    </edge>
    <edge source="57" target="106">
      <data key="d8">476</data>
    </edge>
    <edge source="57" target="107">
      <data key="d8">133</data>
    </edge>
    <edge source="57" target="113">
      <data key="d8">561</data>
    </edge>
    <edge source="57" target="114">
      <data key="d8">392</data>
    </edge>
    <edge source="57" target="58">
      <data key="d8">229</data>
    </edge>
    <edge source="58" target="99">
      <data key="d8">2</data>
    </edge>
    <edge source="58" target="106">
      <data key="d8">41</data>
    </edge>
    <edge source="58" target="107">
      <data key="d8">33</data>
    </edge>
    <edge source="58" target="108">
      <data key="d8">4</data>
    </edge>
    <edge source="58" target="114">
      <data key="d8">21</data>
    </edge>
    <edge source="58" target="115">
      <data key="d8">21</data>
    </edge>
    <edge source="61" target="67">
      <data key="d8">99</data>
    </edge>
    <edge source="61" target="124">
      <data key="d8">150</data>
    </edge>
    <edge source="61" target="125">
      <data key="d8">12</data>
    </edge>
    <edge source="62" target="63">
      <data key="d8">145</data>
    </edge>
    <edge source="62" target="131">
      <data key="d8">61</data>
    </edge>
    <edge source="62" target="68">
      <data key="d8">497</data>
    </edge>
    <edge source="62" target="125">
      <data key="d8">210</data>
    </edge>
    <edge source="62" target="69">
      <data key="d8">107</data>
    </edge>
    <edge source="63" target="64">
      <data key="d8">114</data>
    </edge>
    <edge source="63" target="132">
      <data key="d8">138</data>
    </edge>
    <edge source="63" target="69">
      <data key="d8">375</data>
    </edge>
    <edge source="63" target="70">
      <data key="d8">5</data>
    </edge>
    <edge source="63" target="125">
      <data key="d8">7</data>
    </edge>
    <edge source="63" target="126">
      <data key="d8">200</data>
    </edge>
    <edge source="63" target="127">
      <data key="d8">35</data>
    </edge>
    <edge source="64" target="128">
      <data key="d8">1</data>
    </edge>
    <edge source="64" target="65">
      <data key="d8">53</data>
    </edge>
    <edge source="64" target="132">
      <data key="d8">10</data>
    </edge>
    <edge source="64" target="69">
      <data key="d8">36</data>
    </edge>
    <edge source="64" target="70">
      <data key="d8">110</data>
    </edge>
    <edge source="64" target="71">
      <data key="d8">1</data>
    </edge>
    <edge source="64" target="126">
      <data key="d8">11</data>
    </edge>
    <edge source="64" target="127">
      <data key="d8">243</data>
    </edge>
    <edge source="65" target="128">
      <data key="d8">93</data>
    </edge>
    <edge source="65" target="71">
      <data key="d8">9</data>
    </edge>
    <edge source="65" target="127">
      <data key="d8">88</data>
    </edge>
    <edge source="66" target="72">
      <data key="d8">1</data>
    </edge>
    <edge source="66" target="129">
      <data key="d8">13</data>
    </edge>
    <edge source="66" target="67">
      <data key="d8">56</data>
    </edge>
    <edge source="67" target="129">
      <data key="d8">5</data>
    </edge>
    <edge source="67" target="131">
      <data key="d8">1004</data>
    </edge>
    <edge source="67" target="68">
      <data key="d8">24</data>
    </edge>
    <edge source="67" target="137">
      <data key="d8">234</data>
    </edge>
    <edge source="67" target="138">
      <data key="d8">276</data>
    </edge>
    <edge source="67" target="130">
      <data key="d8">1890</data>
    </edge>
    <edge source="67" target="74">
      <data key="d8">10</data>
    </edge>
    <edge source="67" target="73">
      <data key="d8">233</data>
    </edge>
    <edge source="67" target="124">
      <data key="d8">323</data>
    </edge>
    <edge source="67" target="125">
      <data key="d8">219</data>
    </edge>
    <edge source="68" target="130">
      <data key="d8">4</data>
    </edge>
    <edge source="68" target="131">
      <data key="d8">1152</data>
    </edge>
    <edge source="68" target="69">
      <data key="d8">440</data>
    </edge>
    <edge source="68" target="73">
      <data key="d8">3</data>
    </edge>
    <edge source="68" target="138">
      <data key="d8">426</data>
    </edge>
    <edge source="68" target="75">
      <data key="d8">325</data>
    </edge>
    <edge source="68" target="74">
      <data key="d8">1022</data>
    </edge>
    <edge source="68" target="125">
      <data key="d8">563</data>
    </edge>
    <edge source="69" target="131">
      <data key="d8">179</data>
    </edge>
    <edge source="69" target="132">
      <data key="d8">494</data>
    </edge>
    <edge source="69" target="133">
      <data key="d8">914</data>
    </edge>
    <edge source="69" target="70">
      <data key="d8">1174</data>
    </edge>
    <edge source="69" target="71">
      <data key="d8">1</data>
    </edge>
    <edge source="69" target="140">
      <data key="d8">12</data>
    </edge>
    <edge source="69" target="74">
      <data key="d8">1</data>
    </edge>
    <edge source="69" target="139">
      <data key="d8">25</data>
    </edge>
    <edge source="69" target="76">
      <data key="d8">101</data>
    </edge>
    <edge source="69" target="125">
      <data key="d8">202</data>
    </edge>
    <edge source="69" target="75">
      <data key="d8">908</data>
    </edge>
    <edge source="69" target="84">
      <data key="d8">1</data>
    </edge>
    <edge source="69" target="134">
      <data key="d8">2</data>
    </edge>
    <edge source="69" target="127">
      <data key="d8">215</data>
    </edge>
    <edge source="69" target="138">
      <data key="d8">1</data>
    </edge>
    <edge source="69" target="126">
      <data key="d8">47</data>
    </edge>
    <edge source="70" target="133">
      <data key="d8">1935</data>
    </edge>
    <edge source="70" target="75">
      <data key="d8">746</data>
    </edge>
    <edge source="70" target="132">
      <data key="d8">20</data>
    </edge>
    <edge source="70" target="134">
      <data key="d8">20</data>
    </edge>
    <edge source="70" target="71">
      <data key="d8">39</data>
    </edge>
    <edge source="70" target="140">
      <data key="d8">341</data>
    </edge>
    <edge source="70" target="139">
      <data key="d8">22</data>
    </edge>
    <edge source="70" target="76">
      <data key="d8">571</data>
    </edge>
    <edge source="70" target="77">
      <data key="d8">2</data>
    </edge>
    <edge source="70" target="141">
      <data key="d8">1</data>
    </edge>
    <edge source="70" target="127">
      <data key="d8">395</data>
    </edge>
    <edge source="71" target="203">
      <data key="d8">6</data>
    </edge>
    <edge source="71" target="196">
      <data key="d8">31</data>
    </edge>
    <edge source="71" target="197">
      <data key="d8">12</data>
    </edge>
    <edge source="71" target="134">
      <data key="d8">1224</data>
    </edge>
    <edge source="71" target="140">
      <data key="d8">6</data>
    </edge>
    <edge source="71" target="128">
      <data key="d8">112</data>
    </edge>
    <edge source="71" target="75">
      <data key="d8">10</data>
    </edge>
    <edge source="71" target="76">
      <data key="d8">10</data>
    </edge>
    <edge source="71" target="141">
      <data key="d8">29</data>
    </edge>
    <edge source="71" target="77">
      <data key="d8">46</data>
    </edge>
    <edge source="71" target="204">
      <data key="d8">5</data>
    </edge>
    <edge source="71" target="127">
      <data key="d8">263</data>
    </edge>
    <edge source="71" target="133">
      <data key="d8">1024</data>
    </edge>
    <edge source="72" target="80">
      <data key="d8">351</data>
    </edge>
    <edge source="72" target="136">
      <data key="d8">117</data>
    </edge>
    <edge source="72" target="73">
      <data key="d8">260</data>
    </edge>
    <edge source="72" target="144">
      <data key="d8">67</data>
    </edge>
    <edge source="72" target="81">
      <data key="d8">1</data>
    </edge>
    <edge source="73" target="130">
      <data key="d8">71</data>
    </edge>
    <edge source="73" target="81">
      <data key="d8">1881</data>
    </edge>
    <edge source="73" target="137">
      <data key="d8">293</data>
    </edge>
    <edge source="73" target="138">
      <data key="d8">302</data>
    </edge>
    <edge source="73" target="75">
      <data key="d8">56</data>
    </edge>
    <edge source="73" target="82">
      <data key="d8">428</data>
    </edge>
    <edge source="73" target="80">
      <data key="d8">274</data>
    </edge>
    <edge source="73" target="145">
      <data key="d8">98</data>
    </edge>
    <edge source="73" target="146">
      <data key="d8">25</data>
    </edge>
    <edge source="73" target="131">
      <data key="d8">31</data>
    </edge>
    <edge source="73" target="74">
      <data key="d8">702</data>
    </edge>
    <edge source="74" target="83">
      <data key="d8">1</data>
    </edge>
    <edge source="74" target="137">
      <data key="d8">69</data>
    </edge>
    <edge source="74" target="138">
      <data key="d8">1744</data>
    </edge>
    <edge source="74" target="75">
      <data key="d8">1190</data>
    </edge>
    <edge source="74" target="146">
      <data key="d8">79</data>
    </edge>
    <edge source="74" target="82">
      <data key="d8">654</data>
    </edge>
    <edge source="74" target="131">
      <data key="d8">811</data>
    </edge>
    <edge source="74" target="139">
      <data key="d8">115</data>
    </edge>
    <edge source="74" target="125">
      <data key="d8">145</data>
    </edge>
    <edge source="75" target="131">
      <data key="d8">322</data>
    </edge>
    <edge source="75" target="132">
      <data key="d8">677</data>
    </edge>
    <edge source="75" target="133">
      <data key="d8">1136</data>
    </edge>
    <edge source="75" target="134">
      <data key="d8">20</data>
    </edge>
    <edge source="75" target="137">
      <data key="d8">10</data>
    </edge>
    <edge source="75" target="138">
      <data key="d8">576</data>
    </edge>
    <edge source="75" target="139">
      <data key="d8">829</data>
    </edge>
    <edge source="75" target="140">
      <data key="d8">332</data>
    </edge>
    <edge source="75" target="146">
      <data key="d8">51</data>
    </edge>
    <edge source="75" target="147">
      <data key="d8">48</data>
    </edge>
    <edge source="75" target="76">
      <data key="d8">1024</data>
    </edge>
    <edge source="75" target="82">
      <data key="d8">156</data>
    </edge>
    <edge source="75" target="83">
      <data key="d8">146</data>
    </edge>
    <edge source="75" target="84">
      <data key="d8">24</data>
    </edge>
    <edge source="75" target="125">
      <data key="d8">38</data>
    </edge>
    <edge source="75" target="127">
      <data key="d8">37</data>
    </edge>
    <edge source="76" target="84">
      <data key="d8">623</data>
    </edge>
    <edge source="76" target="132">
      <data key="d8">44</data>
    </edge>
    <edge source="76" target="133">
      <data key="d8">463</data>
    </edge>
    <edge source="76" target="134">
      <data key="d8">19</data>
    </edge>
    <edge source="76" target="139">
      <data key="d8">297</data>
    </edge>
    <edge source="76" target="140">
      <data key="d8">1574</data>
    </edge>
    <edge source="76" target="77">
      <data key="d8">169</data>
    </edge>
    <edge source="76" target="83">
      <data key="d8">16</data>
    </edge>
    <edge source="76" target="148">
      <data key="d8">19</data>
    </edge>
    <edge source="77" target="140">
      <data key="d8">119</data>
    </edge>
    <edge source="77" target="141">
      <data key="d8">86</data>
    </edge>
    <edge source="77" target="78">
      <data key="d8">43</data>
    </edge>
    <edge source="77" target="84">
      <data key="d8">12</data>
    </edge>
    <edge source="77" target="149">
      <data key="d8">3</data>
    </edge>
    <edge source="77" target="86">
      <data key="d8">1</data>
    </edge>
    <edge source="77" target="93">
      <data key="d8">25</data>
    </edge>
    <edge source="77" target="85">
      <data key="d8">1729</data>
    </edge>
    <edge source="78" target="86">
      <data key="d8">23</data>
    </edge>
    <edge source="78" target="85">
      <data key="d8">59</data>
    </edge>
    <edge source="79" target="80">
      <data key="d8">1</data>
    </edge>
    <edge source="80" target="81">
      <data key="d8">1232</data>
    </edge>
    <edge source="80" target="144">
      <data key="d8">75</data>
    </edge>
    <edge source="80" target="145">
      <data key="d8">1</data>
    </edge>
    <edge source="80" target="87">
      <data key="d8">3</data>
    </edge>
    <edge source="80" target="88">
      <data key="d8">673</data>
    </edge>
    <edge source="80" target="89">
      <data key="d8">658</data>
    </edge>
    <edge source="80" target="136">
      <data key="d8">22</data>
    </edge>
    <edge source="81" target="137">
      <data key="d8">27</data>
    </edge>
    <edge source="81" target="145">
      <data key="d8">1136</data>
    </edge>
    <edge source="81" target="146">
      <data key="d8">630</data>
    </edge>
    <edge source="81" target="153">
      <data key="d8">211</data>
    </edge>
    <edge source="81" target="154">
      <data key="d8">1</data>
    </edge>
    <edge source="81" target="82">
      <data key="d8">1129</data>
    </edge>
    <edge source="81" target="83">
      <data key="d8">10</data>
    </edge>
    <edge source="81" target="88">
      <data key="d8">968</data>
    </edge>
    <edge source="81" target="89">
      <data key="d8">3512</data>
    </edge>
    <edge source="81" target="90">
      <data key="d8">32</data>
    </edge>
    <edge source="81" target="97">
      <data key="d8">68</data>
    </edge>
    <edge source="82" target="264">
      <data key="d8">556</data>
    </edge>
    <edge source="82" target="137">
      <data key="d8">128</data>
    </edge>
    <edge source="82" target="138">
      <data key="d8">109</data>
    </edge>
    <edge source="82" target="267">
      <data key="d8">1984</data>
    </edge>
    <edge source="82" target="271">
      <data key="d8">25</data>
    </edge>
    <edge source="82" target="272">
      <data key="d8">106</data>
    </edge>
    <edge source="82" target="145">
      <data key="d8">102</data>
    </edge>
    <edge source="82" target="146">
      <data key="d8">3814</data>
    </edge>
    <edge source="82" target="147">
      <data key="d8">421</data>
    </edge>
    <edge source="82" target="148">
      <data key="d8">36</data>
    </edge>
    <edge source="82" target="153">
      <data key="d8">944</data>
    </edge>
    <edge source="82" target="154">
      <data key="d8">3478</data>
    </edge>
    <edge source="82" target="155">
      <data key="d8">110</data>
    </edge>
    <edge source="82" target="156">
      <data key="d8">109</data>
    </edge>
    <edge source="82" target="161">
      <data key="d8">188</data>
    </edge>
    <edge source="82" target="219">
      <data key="d8">4</data>
    </edge>
    <edge source="82" target="164">
      <data key="d8">3</data>
    </edge>
    <edge source="82" target="308">
      <data key="d8">806</data>
    </edge>
    <edge source="82" target="309">
      <data key="d8">1855</data>
    </edge>
    <edge source="82" target="310">
      <data key="d8">15</data>
    </edge>
    <edge source="82" target="265">
      <data key="d8">2644</data>
    </edge>
    <edge source="82" target="266">
      <data key="d8">1840</data>
    </edge>
    <edge source="82" target="206">
      <data key="d8">1</data>
    </edge>
    <edge source="82" target="207">
      <data key="d8">3152</data>
    </edge>
    <edge source="82" target="208">
      <data key="d8">3123</data>
    </edge>
    <edge source="82" target="209">
      <data key="d8">1930</data>
    </edge>
    <edge source="82" target="210">
      <data key="d8">479</data>
    </edge>
    <edge source="82" target="211">
      <data key="d8">1</data>
    </edge>
    <edge source="82" target="215">
      <data key="d8">2187</data>
    </edge>
    <edge source="82" target="216">
      <data key="d8">1754</data>
    </edge>
    <edge source="82" target="218">
      <data key="d8">70</data>
    </edge>
    <edge source="82" target="91">
      <data key="d8">208</data>
    </edge>
    <edge source="82" target="92">
      <data key="d8">18</data>
    </edge>
    <edge source="82" target="223">
      <data key="d8">180</data>
    </edge>
    <edge source="82" target="97">
      <data key="d8">8</data>
    </edge>
    <edge source="82" target="90">
      <data key="d8">3243</data>
    </edge>
    <edge source="82" target="274">
      <data key="d8">15</data>
    </edge>
    <edge source="82" target="83">
      <data key="d8">1180</data>
    </edge>
    <edge source="82" target="89">
      <data key="d8">121</data>
    </edge>
    <edge source="83" target="264">
      <data key="d8">89</data>
    </edge>
    <edge source="83" target="265">
      <data key="d8">1052</data>
    </edge>
    <edge source="83" target="266">
      <data key="d8">3928</data>
    </edge>
    <edge source="83" target="267">
      <data key="d8">4813</data>
    </edge>
    <edge source="83" target="140">
      <data key="d8">16</data>
    </edge>
    <edge source="83" target="271">
      <data key="d8">1</data>
    </edge>
    <edge source="83" target="272">
      <data key="d8">302</data>
    </edge>
    <edge source="83" target="145">
      <data key="d8">22</data>
    </edge>
    <edge source="83" target="274">
      <data key="d8">153</data>
    </edge>
    <edge source="83" target="147">
      <data key="d8">2369</data>
    </edge>
    <edge source="83" target="148">
      <data key="d8">3060</data>
    </edge>
    <edge source="83" target="153">
      <data key="d8">264</data>
    </edge>
    <edge source="83" target="281">
      <data key="d8">1</data>
    </edge>
    <edge source="83" target="282">
      <data key="d8">1</data>
    </edge>
    <edge source="83" target="155">
      <data key="d8">2506</data>
    </edge>
    <edge source="83" target="156">
      <data key="d8">3985</data>
    </edge>
    <edge source="83" target="154">
      <data key="d8">2058</data>
    </edge>
    <edge source="83" target="161">
      <data key="d8">101</data>
    </edge>
    <edge source="83" target="91">
      <data key="d8">3952</data>
    </edge>
    <edge source="83" target="164">
      <data key="d8">24</data>
    </edge>
    <edge source="83" target="220">
      <data key="d8">1</data>
    </edge>
    <edge source="83" target="308">
      <data key="d8">183</data>
    </edge>
    <edge source="83" target="309">
      <data key="d8">4107</data>
    </edge>
    <edge source="83" target="310">
      <data key="d8">269</data>
    </edge>
    <edge source="83" target="146">
      <data key="d8">603</data>
    </edge>
    <edge source="83" target="207">
      <data key="d8">889</data>
    </edge>
    <edge source="83" target="208">
      <data key="d8">1292</data>
    </edge>
    <edge source="83" target="209">
      <data key="d8">1195</data>
    </edge>
    <edge source="83" target="211">
      <data key="d8">28</data>
    </edge>
    <edge source="83" target="84">
      <data key="d8">2551</data>
    </edge>
    <edge source="83" target="85">
      <data key="d8">538</data>
    </edge>
    <edge source="83" target="215">
      <data key="d8">552</data>
    </edge>
    <edge source="83" target="216">
      <data key="d8">1459</data>
    </edge>
    <edge source="83" target="217">
      <data key="d8">268</data>
    </edge>
    <edge source="83" target="218">
      <data key="d8">3527</data>
    </edge>
    <edge source="83" target="219">
      <data key="d8">98</data>
    </edge>
    <edge source="83" target="92">
      <data key="d8">1361</data>
    </edge>
    <edge source="83" target="93">
      <data key="d8">245</data>
    </edge>
    <edge source="83" target="223">
      <data key="d8">101</data>
    </edge>
    <edge source="83" target="226">
      <data key="d8">1</data>
    </edge>
    <edge source="83" target="90">
      <data key="d8">1166</data>
    </edge>
    <edge source="83" target="210">
      <data key="d8">4729</data>
    </edge>
    <edge source="84" target="132">
      <data key="d8">1</data>
    </edge>
    <edge source="84" target="266">
      <data key="d8">673</data>
    </edge>
    <edge source="84" target="267">
      <data key="d8">673</data>
    </edge>
    <edge source="84" target="140">
      <data key="d8">204</data>
    </edge>
    <edge source="84" target="147">
      <data key="d8">217</data>
    </edge>
    <edge source="84" target="148">
      <data key="d8">2168</data>
    </edge>
    <edge source="84" target="149">
      <data key="d8">17</data>
    </edge>
    <edge source="84" target="156">
      <data key="d8">197</data>
    </edge>
    <edge source="84" target="91">
      <data key="d8">116</data>
    </edge>
    <edge source="84" target="309">
      <data key="d8">673</data>
    </edge>
    <edge source="84" target="139">
      <data key="d8">10</data>
    </edge>
    <edge source="84" target="210">
      <data key="d8">700</data>
    </edge>
    <edge source="84" target="85">
      <data key="d8">1979</data>
    </edge>
    <edge source="84" target="218">
      <data key="d8">39</data>
    </edge>
    <edge source="84" target="219">
      <data key="d8">5</data>
    </edge>
    <edge source="84" target="92">
      <data key="d8">572</data>
    </edge>
    <edge source="84" target="93">
      <data key="d8">943</data>
    </edge>
    <edge source="84" target="211">
      <data key="d8">4</data>
    </edge>
    <edge source="85" target="141">
      <data key="d8">5</data>
    </edge>
    <edge source="85" target="148">
      <data key="d8">854</data>
    </edge>
    <edge source="85" target="149">
      <data key="d8">262</data>
    </edge>
    <edge source="85" target="150">
      <data key="d8">102</data>
    </edge>
    <edge source="85" target="156">
      <data key="d8">93</data>
    </edge>
    <edge source="85" target="157">
      <data key="d8">58</data>
    </edge>
    <edge source="85" target="86">
      <data key="d8">857</data>
    </edge>
    <edge source="85" target="91">
      <data key="d8">1</data>
    </edge>
    <edge source="85" target="92">
      <data key="d8">95</data>
    </edge>
    <edge source="85" target="93">
      <data key="d8">4254</data>
    </edge>
    <edge source="85" target="94">
      <data key="d8">945</data>
    </edge>
    <edge source="85" target="100">
      <data key="d8">2</data>
    </edge>
    <edge source="85" target="101">
      <data key="d8">576</data>
    </edge>
    <edge source="85" target="102">
      <data key="d8">5</data>
    </edge>
    <edge source="86" target="150">
      <data key="d8">95</data>
    </edge>
    <edge source="86" target="93">
      <data key="d8">134</data>
    </edge>
    <edge source="86" target="94">
      <data key="d8">110</data>
    </edge>
    <edge source="87" target="88">
      <data key="d8">29</data>
    </edge>
    <edge source="88" target="96">
      <data key="d8">686</data>
    </edge>
    <edge source="88" target="97">
      <data key="d8">42</data>
    </edge>
    <edge source="88" target="161">
      <data key="d8">2</data>
    </edge>
    <edge source="88" target="145">
      <data key="d8">124</data>
    </edge>
    <edge source="88" target="152">
      <data key="d8">968</data>
    </edge>
    <edge source="88" target="89">
      <data key="d8">2055</data>
    </edge>
    <edge source="88" target="153">
      <data key="d8">1255</data>
    </edge>
    <edge source="89" target="96">
      <data key="d8">15</data>
    </edge>
    <edge source="89" target="161">
      <data key="d8">3</data>
    </edge>
    <edge source="89" target="98">
      <data key="d8">3</data>
    </edge>
    <edge source="89" target="145">
      <data key="d8">806</data>
    </edge>
    <edge source="89" target="146">
      <data key="d8">157</data>
    </edge>
    <edge source="89" target="207">
      <data key="d8">38</data>
    </edge>
    <edge source="89" target="97">
      <data key="d8">1500</data>
    </edge>
    <edge source="89" target="153">
      <data key="d8">2083</data>
    </edge>
    <edge source="89" target="152">
      <data key="d8">1</data>
    </edge>
    <edge source="89" target="154">
      <data key="d8">91</data>
    </edge>
    <edge source="89" target="90">
      <data key="d8">439</data>
    </edge>
    <edge source="90" target="264">
      <data key="d8">967</data>
    </edge>
    <edge source="90" target="265">
      <data key="d8">2719</data>
    </edge>
    <edge source="90" target="266">
      <data key="d8">773</data>
    </edge>
    <edge source="90" target="267">
      <data key="d8">872</data>
    </edge>
    <edge source="90" target="271">
      <data key="d8">85</data>
    </edge>
    <edge source="90" target="272">
      <data key="d8">785</data>
    </edge>
    <edge source="90" target="145">
      <data key="d8">406</data>
    </edge>
    <edge source="90" target="146">
      <data key="d8">1056</data>
    </edge>
    <edge source="90" target="147">
      <data key="d8">13</data>
    </edge>
    <edge source="90" target="148">
      <data key="d8">1</data>
    </edge>
    <edge source="90" target="153">
      <data key="d8">2160</data>
    </edge>
    <edge source="90" target="154">
      <data key="d8">6840</data>
    </edge>
    <edge source="90" target="155">
      <data key="d8">346</data>
    </edge>
    <edge source="90" target="156">
      <data key="d8">359</data>
    </edge>
    <edge source="90" target="161">
      <data key="d8">158</data>
    </edge>
    <edge source="90" target="219">
      <data key="d8">35</data>
    </edge>
    <edge source="90" target="164">
      <data key="d8">5</data>
    </edge>
    <edge source="90" target="308">
      <data key="d8">1475</data>
    </edge>
    <edge source="90" target="309">
      <data key="d8">871</data>
    </edge>
    <edge source="90" target="310">
      <data key="d8">98</data>
    </edge>
    <edge source="90" target="207">
      <data key="d8">3159</data>
    </edge>
    <edge source="90" target="208">
      <data key="d8">1345</data>
    </edge>
    <edge source="90" target="209">
      <data key="d8">710</data>
    </edge>
    <edge source="90" target="210">
      <data key="d8">174</data>
    </edge>
    <edge source="90" target="215">
      <data key="d8">2731</data>
    </edge>
    <edge source="90" target="216">
      <data key="d8">2415</data>
    </edge>
    <edge source="90" target="218">
      <data key="d8">267</data>
    </edge>
    <edge source="90" target="91">
      <data key="d8">4611</data>
    </edge>
    <edge source="90" target="92">
      <data key="d8">264</data>
    </edge>
    <edge source="90" target="223">
      <data key="d8">148</data>
    </edge>
    <edge source="90" target="97">
      <data key="d8">20</data>
    </edge>
    <edge source="90" target="98">
      <data key="d8">962</data>
    </edge>
    <edge source="90" target="99">
      <data key="d8">66</data>
    </edge>
    <edge source="90" target="274">
      <data key="d8">98</data>
    </edge>
    <edge source="90" target="211">
      <data key="d8">1</data>
    </edge>
    <edge source="91" target="264">
      <data key="d8">299</data>
    </edge>
    <edge source="91" target="265">
      <data key="d8">1804</data>
    </edge>
    <edge source="91" target="266">
      <data key="d8">2617</data>
    </edge>
    <edge source="91" target="267">
      <data key="d8">3976</data>
    </edge>
    <edge source="91" target="271">
      <data key="d8">37</data>
    </edge>
    <edge source="91" target="272">
      <data key="d8">1304</data>
    </edge>
    <edge source="91" target="145">
      <data key="d8">246</data>
    </edge>
    <edge source="91" target="146">
      <data key="d8">113</data>
    </edge>
    <edge source="91" target="147">
      <data key="d8">94</data>
    </edge>
    <edge source="91" target="148">
      <data key="d8">599</data>
    </edge>
    <edge source="91" target="281">
      <data key="d8">3</data>
    </edge>
    <edge source="91" target="153">
      <data key="d8">911</data>
    </edge>
    <edge source="91" target="282">
      <data key="d8">3</data>
    </edge>
    <edge source="91" target="155">
      <data key="d8">5206</data>
    </edge>
    <edge source="91" target="156">
      <data key="d8">5885</data>
    </edge>
    <edge source="91" target="154">
      <data key="d8">4018</data>
    </edge>
    <edge source="91" target="161">
      <data key="d8">18</data>
    </edge>
    <edge source="91" target="164">
      <data key="d8">49</data>
    </edge>
    <edge source="91" target="220">
      <data key="d8">1</data>
    </edge>
    <edge source="91" target="309">
      <data key="d8">3399</data>
    </edge>
    <edge source="91" target="310">
      <data key="d8">852</data>
    </edge>
    <edge source="91" target="308">
      <data key="d8">743</data>
    </edge>
    <edge source="91" target="98">
      <data key="d8">98</data>
    </edge>
    <edge source="91" target="207">
      <data key="d8">887</data>
    </edge>
    <edge source="91" target="208">
      <data key="d8">628</data>
    </edge>
    <edge source="91" target="209">
      <data key="d8">896</data>
    </edge>
    <edge source="91" target="210">
      <data key="d8">3556</data>
    </edge>
    <edge source="91" target="211">
      <data key="d8">135</data>
    </edge>
    <edge source="91" target="215">
      <data key="d8">904</data>
    </edge>
    <edge source="91" target="216">
      <data key="d8">2248</data>
    </edge>
    <edge source="91" target="217">
      <data key="d8">457</data>
    </edge>
    <edge source="91" target="218">
      <data key="d8">4054</data>
    </edge>
    <edge source="91" target="219">
      <data key="d8">323</data>
    </edge>
    <edge source="91" target="92">
      <data key="d8">4021</data>
    </edge>
    <edge source="91" target="223">
      <data key="d8">16</data>
    </edge>
    <edge source="91" target="226">
      <data key="d8">3</data>
    </edge>
    <edge source="91" target="99">
      <data key="d8">1399</data>
    </edge>
    <edge source="91" target="100">
      <data key="d8">113</data>
    </edge>
    <edge source="91" target="274">
      <data key="d8">806</data>
    </edge>
    <edge source="92" target="264">
      <data key="d8">1</data>
    </edge>
    <edge source="92" target="265">
      <data key="d8">1</data>
    </edge>
    <edge source="92" target="266">
      <data key="d8">930</data>
    </edge>
    <edge source="92" target="267">
      <data key="d8">930</data>
    </edge>
    <edge source="92" target="145">
      <data key="d8">20</data>
    </edge>
    <edge source="92" target="146">
      <data key="d8">16</data>
    </edge>
    <edge source="92" target="148">
      <data key="d8">1151</data>
    </edge>
    <edge source="92" target="149">
      <data key="d8">42</data>
    </edge>
    <edge source="92" target="281">
      <data key="d8">3</data>
    </edge>
    <edge source="92" target="153">
      <data key="d8">62</data>
    </edge>
    <edge source="92" target="154">
      <data key="d8">172</data>
    </edge>
    <edge source="92" target="156">
      <data key="d8">3606</data>
    </edge>
    <edge source="92" target="282">
      <data key="d8">3</data>
    </edge>
    <edge source="92" target="161">
      <data key="d8">4</data>
    </edge>
    <edge source="92" target="219">
      <data key="d8">324</data>
    </edge>
    <edge source="92" target="164">
      <data key="d8">1</data>
    </edge>
    <edge source="92" target="308">
      <data key="d8">1</data>
    </edge>
    <edge source="92" target="309">
      <data key="d8">930</data>
    </edge>
    <edge source="92" target="101">
      <data key="d8">106</data>
    </edge>
    <edge source="92" target="207">
      <data key="d8">156</data>
    </edge>
    <edge source="92" target="208">
      <data key="d8">21</data>
    </edge>
    <edge source="92" target="211">
      <data key="d8">138</data>
    </edge>
    <edge source="92" target="215">
      <data key="d8">119</data>
    </edge>
    <edge source="92" target="216">
      <data key="d8">60</data>
    </edge>
    <edge source="92" target="218">
      <data key="d8">1228</data>
    </edge>
    <edge source="92" target="220">
      <data key="d8">1</data>
    </edge>
    <edge source="92" target="93">
      <data key="d8">577</data>
    </edge>
    <edge source="92" target="223">
      <data key="d8">4</data>
    </edge>
    <edge source="92" target="226">
      <data key="d8">3</data>
    </edge>
    <edge source="92" target="100">
      <data key="d8">514</data>
    </edge>
    <edge source="92" target="210">
      <data key="d8">1625</data>
    </edge>
    <edge source="93" target="148">
      <data key="d8">893</data>
    </edge>
    <edge source="93" target="149">
      <data key="d8">541</data>
    </edge>
    <edge source="93" target="156">
      <data key="d8">1157</data>
    </edge>
    <edge source="93" target="157">
      <data key="d8">2878</data>
    </edge>
    <edge source="93" target="158">
      <data key="d8">45</data>
    </edge>
    <edge source="93" target="163">
      <data key="d8">4</data>
    </edge>
    <edge source="93" target="164">
      <data key="d8">36</data>
    </edge>
    <edge source="93" target="165">
      <data key="d8">36</data>
    </edge>
    <edge source="93" target="94">
      <data key="d8">1957</data>
    </edge>
    <edge source="93" target="100">
      <data key="d8">71</data>
    </edge>
    <edge source="93" target="101">
      <data key="d8">2788</data>
    </edge>
    <edge source="93" target="102">
      <data key="d8">381</data>
    </edge>
    <edge source="94" target="101">
      <data key="d8">36</data>
    </edge>
    <edge source="94" target="102">
      <data key="d8">109</data>
    </edge>
    <edge source="94" target="149">
      <data key="d8">151</data>
    </edge>
    <edge source="94" target="157">
      <data key="d8">548</data>
    </edge>
    <edge source="94" target="158">
      <data key="d8">244</data>
    </edge>
    <edge source="94" target="166">
      <data key="d8">3</data>
    </edge>
    <edge source="96" target="263">
      <data key="d8">22</data>
    </edge>
    <edge source="96" target="264">
      <data key="d8">50</data>
    </edge>
    <edge source="96" target="265">
      <data key="d8">72</data>
    </edge>
    <edge source="96" target="271">
      <data key="d8">235</data>
    </edge>
    <edge source="96" target="272">
      <data key="d8">1328</data>
    </edge>
    <edge source="96" target="216">
      <data key="d8">155</data>
    </edge>
    <edge source="96" target="277">
      <data key="d8">55</data>
    </edge>
    <edge source="96" target="278">
      <data key="d8">892</data>
    </edge>
    <edge source="96" target="279">
      <data key="d8">956</data>
    </edge>
    <edge source="96" target="152">
      <data key="d8">959</data>
    </edge>
    <edge source="96" target="153">
      <data key="d8">2398</data>
    </edge>
    <edge source="96" target="154">
      <data key="d8">154</data>
    </edge>
    <edge source="96" target="156">
      <data key="d8">2</data>
    </edge>
    <edge source="96" target="160">
      <data key="d8">4323</data>
    </edge>
    <edge source="96" target="161">
      <data key="d8">4471</data>
    </edge>
    <edge source="96" target="162">
      <data key="d8">8</data>
    </edge>
    <edge source="96" target="163">
      <data key="d8">1</data>
    </edge>
    <edge source="96" target="164">
      <data key="d8">2</data>
    </edge>
    <edge source="96" target="168">
      <data key="d8">196</data>
    </edge>
    <edge source="96" target="308">
      <data key="d8">2</data>
    </edge>
    <edge source="96" target="314">
      <data key="d8">846</data>
    </edge>
    <edge source="96" target="225">
      <data key="d8">2</data>
    </edge>
    <edge source="96" target="340">
      <data key="d8">148</data>
    </edge>
    <edge source="96" target="215">
      <data key="d8">1638</data>
    </edge>
    <edge source="96" target="222">
      <data key="d8">178</data>
    </edge>
    <edge source="96" target="223">
      <data key="d8">2243</data>
    </edge>
    <edge source="96" target="224">
      <data key="d8">34</data>
    </edge>
    <edge source="96" target="97">
      <data key="d8">704</data>
    </edge>
    <edge source="96" target="226">
      <data key="d8">1</data>
    </edge>
    <edge source="96" target="103">
      <data key="d8">152</data>
    </edge>
    <edge source="96" target="104">
      <data key="d8">195</data>
    </edge>
    <edge source="97" target="152">
      <data key="d8">56</data>
    </edge>
    <edge source="97" target="153">
      <data key="d8">1179</data>
    </edge>
    <edge source="97" target="154">
      <data key="d8">142</data>
    </edge>
    <edge source="97" target="160">
      <data key="d8">14</data>
    </edge>
    <edge source="97" target="161">
      <data key="d8">1300</data>
    </edge>
    <edge source="97" target="162">
      <data key="d8">155</data>
    </edge>
    <edge source="97" target="168">
      <data key="d8">251</data>
    </edge>
    <edge source="97" target="207">
      <data key="d8">39</data>
    </edge>
    <edge source="97" target="215">
      <data key="d8">39</data>
    </edge>
    <edge source="97" target="98">
      <data key="d8">713</data>
    </edge>
    <edge source="97" target="103">
      <data key="d8">17</data>
    </edge>
    <edge source="97" target="104">
      <data key="d8">795</data>
    </edge>
    <edge source="97" target="105">
      <data key="d8">12</data>
    </edge>
    <edge source="98" target="153">
      <data key="d8">3</data>
    </edge>
    <edge source="98" target="154">
      <data key="d8">199</data>
    </edge>
    <edge source="98" target="161">
      <data key="d8">90</data>
    </edge>
    <edge source="98" target="162">
      <data key="d8">301</data>
    </edge>
    <edge source="98" target="163">
      <data key="d8">502</data>
    </edge>
    <edge source="98" target="168">
      <data key="d8">2</data>
    </edge>
    <edge source="98" target="169">
      <data key="d8">2</data>
    </edge>
    <edge source="98" target="99">
      <data key="d8">1016</data>
    </edge>
    <edge source="98" target="104">
      <data key="d8">446</data>
    </edge>
    <edge source="98" target="105">
      <data key="d8">1895</data>
    </edge>
    <edge source="98" target="106">
      <data key="d8">58</data>
    </edge>
    <edge source="99" target="162">
      <data key="d8">1</data>
    </edge>
    <edge source="99" target="163">
      <data key="d8">888</data>
    </edge>
    <edge source="99" target="169">
      <data key="d8">2</data>
    </edge>
    <edge source="99" target="100">
      <data key="d8">1976</data>
    </edge>
    <edge source="99" target="105">
      <data key="d8">289</data>
    </edge>
    <edge source="99" target="106">
      <data key="d8">2580</data>
    </edge>
    <edge source="99" target="107">
      <data key="d8">1535</data>
    </edge>
    <edge source="100" target="107">
      <data key="d8">1052</data>
    </edge>
    <edge source="100" target="164">
      <data key="d8">585</data>
    </edge>
    <edge source="100" target="165">
      <data key="d8">136</data>
    </edge>
    <edge source="100" target="108">
      <data key="d8">50</data>
    </edge>
    <edge source="100" target="171">
      <data key="d8">132</data>
    </edge>
    <edge source="100" target="172">
      <data key="d8">48</data>
    </edge>
    <edge source="100" target="163">
      <data key="d8">26</data>
    </edge>
    <edge source="100" target="156">
      <data key="d8">42</data>
    </edge>
    <edge source="100" target="101">
      <data key="d8">474</data>
    </edge>
    <edge source="101" target="266">
      <data key="d8">45</data>
    </edge>
    <edge source="101" target="267">
      <data key="d8">221</data>
    </edge>
    <edge source="101" target="268">
      <data key="d8">7</data>
    </edge>
    <edge source="101" target="274">
      <data key="d8">974</data>
    </edge>
    <edge source="101" target="275">
      <data key="d8">2</data>
    </edge>
    <edge source="101" target="148">
      <data key="d8">120</data>
    </edge>
    <edge source="101" target="149">
      <data key="d8">47</data>
    </edge>
    <edge source="101" target="280">
      <data key="d8">88</data>
    </edge>
    <edge source="101" target="281">
      <data key="d8">137</data>
    </edge>
    <edge source="101" target="282">
      <data key="d8">48</data>
    </edge>
    <edge source="101" target="156">
      <data key="d8">2754</data>
    </edge>
    <edge source="101" target="157">
      <data key="d8">4688</data>
    </edge>
    <edge source="101" target="158">
      <data key="d8">256</data>
    </edge>
    <edge source="101" target="163">
      <data key="d8">251</data>
    </edge>
    <edge source="101" target="164">
      <data key="d8">4566</data>
    </edge>
    <edge source="101" target="165">
      <data key="d8">7803</data>
    </edge>
    <edge source="101" target="166">
      <data key="d8">12</data>
    </edge>
    <edge source="101" target="171">
      <data key="d8">641</data>
    </edge>
    <edge source="101" target="172">
      <data key="d8">936</data>
    </edge>
    <edge source="101" target="178">
      <data key="d8">1</data>
    </edge>
    <edge source="101" target="309">
      <data key="d8">91</data>
    </edge>
    <edge source="101" target="310">
      <data key="d8">113</data>
    </edge>
    <edge source="101" target="315">
      <data key="d8">181</data>
    </edge>
    <edge source="101" target="316">
      <data key="d8">527</data>
    </edge>
    <edge source="101" target="317">
      <data key="d8">23</data>
    </edge>
    <edge source="101" target="323">
      <data key="d8">3</data>
    </edge>
    <edge source="101" target="324">
      <data key="d8">9</data>
    </edge>
    <edge source="101" target="210">
      <data key="d8">39</data>
    </edge>
    <edge source="101" target="211">
      <data key="d8">1</data>
    </edge>
    <edge source="101" target="218">
      <data key="d8">1683</data>
    </edge>
    <edge source="101" target="225">
      <data key="d8">633</data>
    </edge>
    <edge source="101" target="226">
      <data key="d8">2391</data>
    </edge>
    <edge source="101" target="227">
      <data key="d8">497</data>
    </edge>
    <edge source="101" target="228">
      <data key="d8">1</data>
    </edge>
    <edge source="101" target="102">
      <data key="d8">1432</data>
    </edge>
    <edge source="101" target="233">
      <data key="d8">337</data>
    </edge>
    <edge source="101" target="107">
      <data key="d8">62</data>
    </edge>
    <edge source="101" target="108">
      <data key="d8">744</data>
    </edge>
    <edge source="101" target="109">
      <data key="d8">1</data>
    </edge>
    <edge source="101" target="341">
      <data key="d8">176</data>
    </edge>
    <edge source="102" target="273">
      <data key="d8">7</data>
    </edge>
    <edge source="102" target="274">
      <data key="d8">61</data>
    </edge>
    <edge source="102" target="149">
      <data key="d8">9</data>
    </edge>
    <edge source="102" target="280">
      <data key="d8">1</data>
    </edge>
    <edge source="102" target="281">
      <data key="d8">223</data>
    </edge>
    <edge source="102" target="282">
      <data key="d8">186</data>
    </edge>
    <edge source="102" target="283">
      <data key="d8">13</data>
    </edge>
    <edge source="102" target="156">
      <data key="d8">39</data>
    </edge>
    <edge source="102" target="157">
      <data key="d8">534</data>
    </edge>
    <edge source="102" target="158">
      <data key="d8">70</data>
    </edge>
    <edge source="102" target="288">
      <data key="d8">116</data>
    </edge>
    <edge source="102" target="164">
      <data key="d8">42</data>
    </edge>
    <edge source="102" target="165">
      <data key="d8">1881</data>
    </edge>
    <edge source="102" target="166">
      <data key="d8">808</data>
    </edge>
    <edge source="102" target="171">
      <data key="d8">1</data>
    </edge>
    <edge source="102" target="172">
      <data key="d8">53</data>
    </edge>
    <edge source="102" target="315">
      <data key="d8">74</data>
    </edge>
    <edge source="102" target="316">
      <data key="d8">54</data>
    </edge>
    <edge source="102" target="322">
      <data key="d8">14</data>
    </edge>
    <edge source="102" target="323">
      <data key="d8">109</data>
    </edge>
    <edge source="102" target="218">
      <data key="d8">42</data>
    </edge>
    <edge source="102" target="226">
      <data key="d8">1057</data>
    </edge>
    <edge source="102" target="227">
      <data key="d8">1419</data>
    </edge>
    <edge source="102" target="228">
      <data key="d8">131</data>
    </edge>
    <edge source="102" target="233">
      <data key="d8">139</data>
    </edge>
    <edge source="102" target="108">
      <data key="d8">10</data>
    </edge>
    <edge source="102" target="109">
      <data key="d8">6</data>
    </edge>
    <edge source="102" target="341">
      <data key="d8">54</data>
    </edge>
    <edge source="103" target="161">
      <data key="d8">509</data>
    </edge>
    <edge source="103" target="162">
      <data key="d8">11</data>
    </edge>
    <edge source="103" target="230">
      <data key="d8">11</data>
    </edge>
    <edge source="103" target="231">
      <data key="d8">41</data>
    </edge>
    <edge source="103" target="104">
      <data key="d8">823</data>
    </edge>
    <edge source="103" target="169">
      <data key="d8">28</data>
    </edge>
    <edge source="103" target="167">
      <data key="d8">70</data>
    </edge>
    <edge source="103" target="224">
      <data key="d8">55</data>
    </edge>
    <edge source="103" target="110">
      <data key="d8">26</data>
    </edge>
    <edge source="103" target="111">
      <data key="d8">16</data>
    </edge>
    <edge source="103" target="168">
      <data key="d8">580</data>
    </edge>
    <edge source="103" target="237">
      <data key="d8">1</data>
    </edge>
    <edge source="103" target="174">
      <data key="d8">8</data>
    </edge>
    <edge source="103" target="175">
      <data key="d8">11</data>
    </edge>
    <edge source="103" target="223">
      <data key="d8">59</data>
    </edge>
    <edge source="104" target="238">
      <data key="d8">66</data>
    </edge>
    <edge source="104" target="161">
      <data key="d8">1030</data>
    </edge>
    <edge source="104" target="162">
      <data key="d8">146</data>
    </edge>
    <edge source="104" target="168">
      <data key="d8">2039</data>
    </edge>
    <edge source="104" target="169">
      <data key="d8">594</data>
    </edge>
    <edge source="104" target="175">
      <data key="d8">724</data>
    </edge>
    <edge source="104" target="176">
      <data key="d8">591</data>
    </edge>
    <edge source="104" target="223">
      <data key="d8">67</data>
    </edge>
    <edge source="104" target="224">
      <data key="d8">63</data>
    </edge>
    <edge source="104" target="230">
      <data key="d8">11</data>
    </edge>
    <edge source="104" target="105">
      <data key="d8">1383</data>
    </edge>
    <edge source="104" target="231">
      <data key="d8">123</data>
    </edge>
    <edge source="104" target="237">
      <data key="d8">1</data>
    </edge>
    <edge source="104" target="110">
      <data key="d8">11</data>
    </edge>
    <edge source="104" target="111">
      <data key="d8">381</data>
    </edge>
    <edge source="105" target="162">
      <data key="d8">7</data>
    </edge>
    <edge source="105" target="163">
      <data key="d8">77</data>
    </edge>
    <edge source="105" target="168">
      <data key="d8">427</data>
    </edge>
    <edge source="105" target="169">
      <data key="d8">514</data>
    </edge>
    <edge source="105" target="175">
      <data key="d8">165</data>
    </edge>
    <edge source="105" target="176">
      <data key="d8">111</data>
    </edge>
    <edge source="105" target="231">
      <data key="d8">3</data>
    </edge>
    <edge source="105" target="106">
      <data key="d8">750</data>
    </edge>
    <edge source="105" target="238">
      <data key="d8">3</data>
    </edge>
    <edge source="105" target="111">
      <data key="d8">142</data>
    </edge>
    <edge source="105" target="112">
      <data key="d8">209</data>
    </edge>
    <edge source="106" target="163">
      <data key="d8">28</data>
    </edge>
    <edge source="106" target="170">
      <data key="d8">3</data>
    </edge>
    <edge source="106" target="171">
      <data key="d8">1</data>
    </edge>
    <edge source="106" target="178">
      <data key="d8">1</data>
    </edge>
    <edge source="106" target="107">
      <data key="d8">2123</data>
    </edge>
    <edge source="106" target="113">
      <data key="d8">74</data>
    </edge>
    <edge source="106" target="114">
      <data key="d8">341</data>
    </edge>
    <edge source="107" target="163">
      <data key="d8">59</data>
    </edge>
    <edge source="107" target="164">
      <data key="d8">239</data>
    </edge>
    <edge source="107" target="165">
      <data key="d8">3</data>
    </edge>
    <edge source="107" target="170">
      <data key="d8">1</data>
    </edge>
    <edge source="107" target="171">
      <data key="d8">974</data>
    </edge>
    <edge source="107" target="172">
      <data key="d8">171</data>
    </edge>
    <edge source="107" target="178">
      <data key="d8">284</data>
    </edge>
    <edge source="107" target="233">
      <data key="d8">12</data>
    </edge>
    <edge source="107" target="108">
      <data key="d8">305</data>
    </edge>
    <edge source="107" target="113">
      <data key="d8">2</data>
    </edge>
    <edge source="107" target="114">
      <data key="d8">706</data>
    </edge>
    <edge source="107" target="115">
      <data key="d8">1</data>
    </edge>
    <edge source="107" target="234">
      <data key="d8">1</data>
    </edge>
    <edge source="108" target="226">
      <data key="d8">2</data>
    </edge>
    <edge source="108" target="165">
      <data key="d8">59</data>
    </edge>
    <edge source="108" target="233">
      <data key="d8">160</data>
    </edge>
    <edge source="108" target="234">
      <data key="d8">20</data>
    </edge>
    <edge source="108" target="171">
      <data key="d8">1214</data>
    </edge>
    <edge source="108" target="172">
      <data key="d8">1360</data>
    </edge>
    <edge source="108" target="109">
      <data key="d8">34</data>
    </edge>
    <edge source="108" target="178">
      <data key="d8">2</data>
    </edge>
    <edge source="108" target="115">
      <data key="d8">93</data>
    </edge>
    <edge source="108" target="164">
      <data key="d8">824</data>
    </edge>
    <edge source="108" target="114">
      <data key="d8">12</data>
    </edge>
    <edge source="109" target="173">
      <data key="d8">22</data>
    </edge>
    <edge source="110" target="111">
      <data key="d8">13</data>
    </edge>
    <edge source="110" target="174">
      <data key="d8">7</data>
    </edge>
    <edge source="111" target="112">
      <data key="d8">171</data>
    </edge>
    <edge source="111" target="170">
      <data key="d8">1</data>
    </edge>
    <edge source="111" target="237">
      <data key="d8">33</data>
    </edge>
    <edge source="111" target="175">
      <data key="d8">627</data>
    </edge>
    <edge source="111" target="176">
      <data key="d8">338</data>
    </edge>
    <edge source="111" target="168">
      <data key="d8">5</data>
    </edge>
    <edge source="111" target="116">
      <data key="d8">2</data>
    </edge>
    <edge source="111" target="238">
      <data key="d8">44</data>
    </edge>
    <edge source="111" target="169">
      <data key="d8">203</data>
    </edge>
    <edge source="111" target="117">
      <data key="d8">13</data>
    </edge>
    <edge source="112" target="113">
      <data key="d8">190</data>
    </edge>
    <edge source="112" target="168">
      <data key="d8">4</data>
    </edge>
    <edge source="112" target="169">
      <data key="d8">95</data>
    </edge>
    <edge source="112" target="170">
      <data key="d8">8</data>
    </edge>
    <edge source="112" target="237">
      <data key="d8">65</data>
    </edge>
    <edge source="112" target="238">
      <data key="d8">121</data>
    </edge>
    <edge source="112" target="175">
      <data key="d8">59</data>
    </edge>
    <edge source="112" target="176">
      <data key="d8">1213</data>
    </edge>
    <edge source="112" target="177">
      <data key="d8">66</data>
    </edge>
    <edge source="112" target="117">
      <data key="d8">57</data>
    </edge>
    <edge source="112" target="181">
      <data key="d8">38</data>
    </edge>
    <edge source="113" target="240">
      <data key="d8">54</data>
    </edge>
    <edge source="113" target="118">
      <data key="d8">57</data>
    </edge>
    <edge source="113" target="170">
      <data key="d8">6</data>
    </edge>
    <edge source="113" target="178">
      <data key="d8">793</data>
    </edge>
    <edge source="113" target="176">
      <data key="d8">81</data>
    </edge>
    <edge source="113" target="177">
      <data key="d8">533</data>
    </edge>
    <edge source="113" target="114">
      <data key="d8">910</data>
    </edge>
    <edge source="113" target="182">
      <data key="d8">53</data>
    </edge>
    <edge source="113" target="183">
      <data key="d8">2</data>
    </edge>
    <edge source="114" target="171">
      <data key="d8">80</data>
    </edge>
    <edge source="114" target="118">
      <data key="d8">6</data>
    </edge>
    <edge source="114" target="170">
      <data key="d8">3</data>
    </edge>
    <edge source="114" target="115">
      <data key="d8">203</data>
    </edge>
    <edge source="114" target="240">
      <data key="d8">61</data>
    </edge>
    <edge source="114" target="177">
      <data key="d8">161</data>
    </edge>
    <edge source="114" target="178">
      <data key="d8">1848</data>
    </edge>
    <edge source="114" target="179">
      <data key="d8">5</data>
    </edge>
    <edge source="114" target="182">
      <data key="d8">10</data>
    </edge>
    <edge source="114" target="183">
      <data key="d8">109</data>
    </edge>
    <edge source="114" target="119">
      <data key="d8">48</data>
    </edge>
    <edge source="115" target="171">
      <data key="d8">59</data>
    </edge>
    <edge source="115" target="172">
      <data key="d8">1</data>
    </edge>
    <edge source="115" target="178">
      <data key="d8">191</data>
    </edge>
    <edge source="115" target="179">
      <data key="d8">223</data>
    </edge>
    <edge source="116" target="180">
      <data key="d8">19</data>
    </edge>
    <edge source="116" target="117">
      <data key="d8">16</data>
    </edge>
    <edge source="117" target="180">
      <data key="d8">8</data>
    </edge>
    <edge source="117" target="181">
      <data key="d8">135</data>
    </edge>
    <edge source="118" target="182">
      <data key="d8">41</data>
    </edge>
    <edge source="118" target="119">
      <data key="d8">2</data>
    </edge>
    <edge source="119" target="178">
      <data key="d8">16</data>
    </edge>
    <edge source="119" target="183">
      <data key="d8">86</data>
    </edge>
    <edge source="119" target="182">
      <data key="d8">1</data>
    </edge>
    <edge source="120" target="121">
      <data key="d8">27</data>
    </edge>
    <edge source="120" target="184">
      <data key="d8">25</data>
    </edge>
    <edge source="120" target="185">
      <data key="d8">1</data>
    </edge>
    <edge source="120" target="188">
      <data key="d8">7</data>
    </edge>
    <edge source="120" target="125">
      <data key="d8">347</data>
    </edge>
    <edge source="120" target="126">
      <data key="d8">91</data>
    </edge>
    <edge source="121" target="125">
      <data key="d8">9</data>
    </edge>
    <edge source="121" target="185">
      <data key="d8">8</data>
    </edge>
    <edge source="121" target="122">
      <data key="d8">54</data>
    </edge>
    <edge source="121" target="189">
      <data key="d8">8</data>
    </edge>
    <edge source="121" target="126">
      <data key="d8">350</data>
    </edge>
    <edge source="121" target="127">
      <data key="d8">106</data>
    </edge>
    <edge source="122" target="126">
      <data key="d8">69</data>
    </edge>
    <edge source="122" target="127">
      <data key="d8">204</data>
    </edge>
    <edge source="124" target="193">
      <data key="d8">298</data>
    </edge>
    <edge source="124" target="130">
      <data key="d8">1254</data>
    </edge>
    <edge source="124" target="125">
      <data key="d8">223</data>
    </edge>
    <edge source="124" target="187">
      <data key="d8">188</data>
    </edge>
    <edge source="125" target="129">
      <data key="d8">241</data>
    </edge>
    <edge source="125" target="130">
      <data key="d8">815</data>
    </edge>
    <edge source="125" target="131">
      <data key="d8">5536</data>
    </edge>
    <edge source="125" target="260">
      <data key="d8">4</data>
    </edge>
    <edge source="125" target="136">
      <data key="d8">59</data>
    </edge>
    <edge source="125" target="137">
      <data key="d8">584</data>
    </edge>
    <edge source="125" target="138">
      <data key="d8">2201</data>
    </edge>
    <edge source="125" target="267">
      <data key="d8">1</data>
    </edge>
    <edge source="125" target="140">
      <data key="d8">192</data>
    </edge>
    <edge source="125" target="258">
      <data key="d8">12</data>
    </edge>
    <edge source="125" target="259">
      <data key="d8">4</data>
    </edge>
    <edge source="125" target="148">
      <data key="d8">4</data>
    </edge>
    <edge source="125" target="132">
      <data key="d8">84</data>
    </edge>
    <edge source="125" target="302">
      <data key="d8">8</data>
    </edge>
    <edge source="125" target="303">
      <data key="d8">4</data>
    </edge>
    <edge source="125" target="189">
      <data key="d8">105</data>
    </edge>
    <edge source="125" target="308">
      <data key="d8">16</data>
    </edge>
    <edge source="125" target="309">
      <data key="d8">2</data>
    </edge>
    <edge source="125" target="265">
      <data key="d8">14</data>
    </edge>
    <edge source="125" target="184">
      <data key="d8">25</data>
    </edge>
    <edge source="125" target="187">
      <data key="d8">11</data>
    </edge>
    <edge source="125" target="188">
      <data key="d8">671</data>
    </edge>
    <edge source="125" target="266">
      <data key="d8">2</data>
    </edge>
    <edge source="125" target="192">
      <data key="d8">106</data>
    </edge>
    <edge source="125" target="193">
      <data key="d8">163</data>
    </edge>
    <edge source="125" target="194">
      <data key="d8">1196</data>
    </edge>
    <edge source="125" target="199">
      <data key="d8">147</data>
    </edge>
    <edge source="125" target="200">
      <data key="d8">923</data>
    </edge>
    <edge source="125" target="201">
      <data key="d8">933</data>
    </edge>
    <edge source="125" target="202">
      <data key="d8">348</data>
    </edge>
    <edge source="125" target="203">
      <data key="d8">218</data>
    </edge>
    <edge source="125" target="207">
      <data key="d8">68</data>
    </edge>
    <edge source="125" target="208">
      <data key="d8">203</data>
    </edge>
    <edge source="125" target="209">
      <data key="d8">314</data>
    </edge>
    <edge source="125" target="210">
      <data key="d8">151</data>
    </edge>
    <edge source="125" target="195">
      <data key="d8">156</data>
    </edge>
    <edge source="125" target="126">
      <data key="d8">462</data>
    </edge>
    <edge source="126" target="131">
      <data key="d8">23</data>
    </edge>
    <edge source="126" target="132">
      <data key="d8">433</data>
    </edge>
    <edge source="126" target="189">
      <data key="d8">316</data>
    </edge>
    <edge source="126" target="195">
      <data key="d8">53</data>
    </edge>
    <edge source="126" target="185">
      <data key="d8">4</data>
    </edge>
    <edge source="126" target="188">
      <data key="d8">1</data>
    </edge>
    <edge source="126" target="190">
      <data key="d8">22</data>
    </edge>
    <edge source="126" target="127">
      <data key="d8">564</data>
    </edge>
    <edge source="127" target="128">
      <data key="d8">236</data>
    </edge>
    <edge source="127" target="132">
      <data key="d8">1293</data>
    </edge>
    <edge source="127" target="133">
      <data key="d8">3438</data>
    </edge>
    <edge source="127" target="134">
      <data key="d8">836</data>
    </edge>
    <edge source="127" target="140">
      <data key="d8">572</data>
    </edge>
    <edge source="127" target="141">
      <data key="d8">409</data>
    </edge>
    <edge source="127" target="189">
      <data key="d8">69</data>
    </edge>
    <edge source="127" target="190">
      <data key="d8">450</data>
    </edge>
    <edge source="127" target="195">
      <data key="d8">975</data>
    </edge>
    <edge source="127" target="196">
      <data key="d8">1303</data>
    </edge>
    <edge source="127" target="197">
      <data key="d8">173</data>
    </edge>
    <edge source="127" target="202">
      <data key="d8">20</data>
    </edge>
    <edge source="127" target="203">
      <data key="d8">1074</data>
    </edge>
    <edge source="127" target="204">
      <data key="d8">1008</data>
    </edge>
    <edge source="127" target="210">
      <data key="d8">61</data>
    </edge>
    <edge source="128" target="134">
      <data key="d8">195</data>
    </edge>
    <edge source="129" target="192">
      <data key="d8">840</data>
    </edge>
    <edge source="129" target="257">
      <data key="d8">7</data>
    </edge>
    <edge source="129" target="130">
      <data key="d8">2281</data>
    </edge>
    <edge source="129" target="131">
      <data key="d8">915</data>
    </edge>
    <edge source="129" target="188">
      <data key="d8">30</data>
    </edge>
    <edge source="129" target="193">
      <data key="d8">755</data>
    </edge>
    <edge source="129" target="136">
      <data key="d8">103</data>
    </edge>
    <edge source="129" target="137">
      <data key="d8">379</data>
    </edge>
    <edge source="129" target="258">
      <data key="d8">43</data>
    </edge>
    <edge source="129" target="199">
      <data key="d8">161</data>
    </edge>
    <edge source="129" target="194">
      <data key="d8">822</data>
    </edge>
    <edge source="129" target="200">
      <data key="d8">314</data>
    </edge>
    <edge source="129" target="302">
      <data key="d8">1</data>
    </edge>
    <edge source="129" target="201">
      <data key="d8">223</data>
    </edge>
    <edge source="129" target="251">
      <data key="d8">19</data>
    </edge>
    <edge source="129" target="252">
      <data key="d8">38</data>
    </edge>
    <edge source="129" target="138">
      <data key="d8">3</data>
    </edge>
    <edge source="130" target="258">
      <data key="d8">63</data>
    </edge>
    <edge source="130" target="131">
      <data key="d8">4259</data>
    </edge>
    <edge source="130" target="257">
      <data key="d8">1</data>
    </edge>
    <edge source="130" target="136">
      <data key="d8">22</data>
    </edge>
    <edge source="130" target="137">
      <data key="d8">1021</data>
    </edge>
    <edge source="130" target="138">
      <data key="d8">381</data>
    </edge>
    <edge source="130" target="302">
      <data key="d8">1</data>
    </edge>
    <edge source="130" target="201">
      <data key="d8">321</data>
    </edge>
    <edge source="130" target="187">
      <data key="d8">1</data>
    </edge>
    <edge source="130" target="188">
      <data key="d8">13</data>
    </edge>
    <edge source="130" target="192">
      <data key="d8">837</data>
    </edge>
    <edge source="130" target="193">
      <data key="d8">1931</data>
    </edge>
    <edge source="130" target="194">
      <data key="d8">1932</data>
    </edge>
    <edge source="130" target="199">
      <data key="d8">32</data>
    </edge>
    <edge source="130" target="200">
      <data key="d8">275</data>
    </edge>
    <edge source="130" target="252">
      <data key="d8">55</data>
    </edge>
    <edge source="131" target="258">
      <data key="d8">209</data>
    </edge>
    <edge source="131" target="259">
      <data key="d8">161</data>
    </edge>
    <edge source="131" target="132">
      <data key="d8">276</data>
    </edge>
    <edge source="131" target="136">
      <data key="d8">495</data>
    </edge>
    <edge source="131" target="265">
      <data key="d8">66</data>
    </edge>
    <edge source="131" target="138">
      <data key="d8">8361</data>
    </edge>
    <edge source="131" target="267">
      <data key="d8">3</data>
    </edge>
    <edge source="131" target="140">
      <data key="d8">517</data>
    </edge>
    <edge source="131" target="141">
      <data key="d8">8</data>
    </edge>
    <edge source="131" target="148">
      <data key="d8">5</data>
    </edge>
    <edge source="131" target="260">
      <data key="d8">161</data>
    </edge>
    <edge source="131" target="201">
      <data key="d8">3994</data>
    </edge>
    <edge source="131" target="302">
      <data key="d8">187</data>
    </edge>
    <edge source="131" target="303">
      <data key="d8">211</data>
    </edge>
    <edge source="131" target="308">
      <data key="d8">168</data>
    </edge>
    <edge source="131" target="309">
      <data key="d8">20</data>
    </edge>
    <edge source="131" target="137">
      <data key="d8">1448</data>
    </edge>
    <edge source="131" target="202">
      <data key="d8">1350</data>
    </edge>
    <edge source="131" target="188">
      <data key="d8">33</data>
    </edge>
    <edge source="131" target="266">
      <data key="d8">4</data>
    </edge>
    <edge source="131" target="192">
      <data key="d8">200</data>
    </edge>
    <edge source="131" target="193">
      <data key="d8">178</data>
    </edge>
    <edge source="131" target="194">
      <data key="d8">3364</data>
    </edge>
    <edge source="131" target="195">
      <data key="d8">80</data>
    </edge>
    <edge source="131" target="199">
      <data key="d8">596</data>
    </edge>
    <edge source="131" target="200">
      <data key="d8">2780</data>
    </edge>
    <edge source="131" target="203">
      <data key="d8">793</data>
    </edge>
    <edge source="131" target="207">
      <data key="d8">177</data>
    </edge>
    <edge source="131" target="208">
      <data key="d8">511</data>
    </edge>
    <edge source="131" target="209">
      <data key="d8">729</data>
    </edge>
    <edge source="131" target="210">
      <data key="d8">237</data>
    </edge>
    <edge source="131" target="189">
      <data key="d8">1</data>
    </edge>
    <edge source="132" target="259">
      <data key="d8">5</data>
    </edge>
    <edge source="132" target="260">
      <data key="d8">5</data>
    </edge>
    <edge source="132" target="133">
      <data key="d8">5008</data>
    </edge>
    <edge source="132" target="134">
      <data key="d8">130</data>
    </edge>
    <edge source="132" target="137">
      <data key="d8">182</data>
    </edge>
    <edge source="132" target="138">
      <data key="d8">109</data>
    </edge>
    <edge source="132" target="139">
      <data key="d8">1408</data>
    </edge>
    <edge source="132" target="140">
      <data key="d8">4115</data>
    </edge>
    <edge source="132" target="141">
      <data key="d8">867</data>
    </edge>
    <edge source="132" target="150">
      <data key="d8">24</data>
    </edge>
    <edge source="132" target="303">
      <data key="d8">5</data>
    </edge>
    <edge source="132" target="189">
      <data key="d8">19</data>
    </edge>
    <edge source="132" target="190">
      <data key="d8">38</data>
    </edge>
    <edge source="132" target="194">
      <data key="d8">29</data>
    </edge>
    <edge source="132" target="195">
      <data key="d8">1676</data>
    </edge>
    <edge source="132" target="196">
      <data key="d8">1728</data>
    </edge>
    <edge source="132" target="197">
      <data key="d8">64</data>
    </edge>
    <edge source="132" target="200">
      <data key="d8">184</data>
    </edge>
    <edge source="132" target="201">
      <data key="d8">279</data>
    </edge>
    <edge source="132" target="202">
      <data key="d8">309</data>
    </edge>
    <edge source="132" target="203">
      <data key="d8">2950</data>
    </edge>
    <edge source="132" target="207">
      <data key="d8">42</data>
    </edge>
    <edge source="132" target="208">
      <data key="d8">184</data>
    </edge>
    <edge source="132" target="209">
      <data key="d8">192</data>
    </edge>
    <edge source="132" target="211">
      <data key="d8">49</data>
    </edge>
    <edge source="132" target="218">
      <data key="d8">117</data>
    </edge>
    <edge source="132" target="210">
      <data key="d8">592</data>
    </edge>
    <edge source="132" target="204">
      <data key="d8">1689</data>
    </edge>
    <edge source="132" target="212">
      <data key="d8">45</data>
    </edge>
    <edge source="133" target="259">
      <data key="d8">5</data>
    </edge>
    <edge source="133" target="260">
      <data key="d8">5</data>
    </edge>
    <edge source="133" target="134">
      <data key="d8">4807</data>
    </edge>
    <edge source="133" target="137">
      <data key="d8">172</data>
    </edge>
    <edge source="133" target="138">
      <data key="d8">90</data>
    </edge>
    <edge source="133" target="139">
      <data key="d8">226</data>
    </edge>
    <edge source="133" target="140">
      <data key="d8">6091</data>
    </edge>
    <edge source="133" target="141">
      <data key="d8">1149</data>
    </edge>
    <edge source="133" target="150">
      <data key="d8">27</data>
    </edge>
    <edge source="133" target="303">
      <data key="d8">5</data>
    </edge>
    <edge source="133" target="190">
      <data key="d8">116</data>
    </edge>
    <edge source="133" target="195">
      <data key="d8">1518</data>
    </edge>
    <edge source="133" target="196">
      <data key="d8">3843</data>
    </edge>
    <edge source="133" target="197">
      <data key="d8">839</data>
    </edge>
    <edge source="133" target="200">
      <data key="d8">174</data>
    </edge>
    <edge source="133" target="201">
      <data key="d8">276</data>
    </edge>
    <edge source="133" target="202">
      <data key="d8">257</data>
    </edge>
    <edge source="133" target="207">
      <data key="d8">37</data>
    </edge>
    <edge source="133" target="208">
      <data key="d8">174</data>
    </edge>
    <edge source="133" target="209">
      <data key="d8">181</data>
    </edge>
    <edge source="133" target="210">
      <data key="d8">570</data>
    </edge>
    <edge source="133" target="211">
      <data key="d8">53</data>
    </edge>
    <edge source="133" target="212">
      <data key="d8">48</data>
    </edge>
    <edge source="133" target="203">
      <data key="d8">3813</data>
    </edge>
    <edge source="133" target="218">
      <data key="d8">115</data>
    </edge>
    <edge source="133" target="204">
      <data key="d8">2531</data>
    </edge>
    <edge source="134" target="196">
      <data key="d8">1129</data>
    </edge>
    <edge source="134" target="197">
      <data key="d8">1111</data>
    </edge>
    <edge source="134" target="140">
      <data key="d8">412</data>
    </edge>
    <edge source="134" target="203">
      <data key="d8">230</data>
    </edge>
    <edge source="134" target="204">
      <data key="d8">133</data>
    </edge>
    <edge source="134" target="141">
      <data key="d8">395</data>
    </edge>
    <edge source="134" target="195">
      <data key="d8">10</data>
    </edge>
    <edge source="134" target="190">
      <data key="d8">3</data>
    </edge>
    <edge source="136" target="192">
      <data key="d8">17</data>
    </edge>
    <edge source="136" target="193">
      <data key="d8">50</data>
    </edge>
    <edge source="136" target="258">
      <data key="d8">1</data>
    </edge>
    <edge source="136" target="199">
      <data key="d8">504</data>
    </edge>
    <edge source="136" target="138">
      <data key="d8">165</data>
    </edge>
    <edge source="136" target="200">
      <data key="d8">658</data>
    </edge>
    <edge source="136" target="257">
      <data key="d8">2</data>
    </edge>
    <edge source="136" target="194">
      <data key="d8">424</data>
    </edge>
    <edge source="136" target="145">
      <data key="d8">3</data>
    </edge>
    <edge source="136" target="144">
      <data key="d8">359</data>
    </edge>
    <edge source="136" target="201">
      <data key="d8">579</data>
    </edge>
    <edge source="136" target="137">
      <data key="d8">395</data>
    </edge>
    <edge source="136" target="251">
      <data key="d8">6</data>
    </edge>
    <edge source="136" target="188">
      <data key="d8">8</data>
    </edge>
    <edge source="137" target="265">
      <data key="d8">55</data>
    </edge>
    <edge source="137" target="138">
      <data key="d8">2506</data>
    </edge>
    <edge source="137" target="140">
      <data key="d8">657</data>
    </edge>
    <edge source="137" target="258">
      <data key="d8">1</data>
    </edge>
    <edge source="137" target="144">
      <data key="d8">154</data>
    </edge>
    <edge source="137" target="145">
      <data key="d8">1054</data>
    </edge>
    <edge source="137" target="146">
      <data key="d8">104</data>
    </edge>
    <edge source="137" target="148">
      <data key="d8">244</data>
    </edge>
    <edge source="137" target="149">
      <data key="d8">4</data>
    </edge>
    <edge source="137" target="150">
      <data key="d8">8</data>
    </edge>
    <edge source="137" target="308">
      <data key="d8">55</data>
    </edge>
    <edge source="137" target="309">
      <data key="d8">43</data>
    </edge>
    <edge source="137" target="201">
      <data key="d8">1587</data>
    </edge>
    <edge source="137" target="192">
      <data key="d8">3</data>
    </edge>
    <edge source="137" target="193">
      <data key="d8">99</data>
    </edge>
    <edge source="137" target="194">
      <data key="d8">172</data>
    </edge>
    <edge source="137" target="195">
      <data key="d8">47</data>
    </edge>
    <edge source="137" target="196">
      <data key="d8">145</data>
    </edge>
    <edge source="137" target="199">
      <data key="d8">5</data>
    </edge>
    <edge source="137" target="200">
      <data key="d8">2520</data>
    </edge>
    <edge source="137" target="202">
      <data key="d8">476</data>
    </edge>
    <edge source="137" target="204">
      <data key="d8">77</data>
    </edge>
    <edge source="137" target="141">
      <data key="d8">55</data>
    </edge>
    <edge source="137" target="208">
      <data key="d8">1217</data>
    </edge>
    <edge source="137" target="211">
      <data key="d8">14</data>
    </edge>
    <edge source="137" target="212">
      <data key="d8">2</data>
    </edge>
    <edge source="137" target="203">
      <data key="d8">666</data>
    </edge>
    <edge source="137" target="207">
      <data key="d8">795</data>
    </edge>
    <edge source="137" target="209">
      <data key="d8">1176</data>
    </edge>
    <edge source="137" target="210">
      <data key="d8">949</data>
    </edge>
    <edge source="138" target="260">
      <data key="d8">131</data>
    </edge>
    <edge source="138" target="266">
      <data key="d8">119</data>
    </edge>
    <edge source="138" target="139">
      <data key="d8">3237</data>
    </edge>
    <edge source="138" target="140">
      <data key="d8">833</data>
    </edge>
    <edge source="138" target="141">
      <data key="d8">28</data>
    </edge>
    <edge source="138" target="145">
      <data key="d8">5</data>
    </edge>
    <edge source="138" target="146">
      <data key="d8">1813</data>
    </edge>
    <edge source="138" target="147">
      <data key="d8">77</data>
    </edge>
    <edge source="138" target="148">
      <data key="d8">360</data>
    </edge>
    <edge source="138" target="153">
      <data key="d8">16</data>
    </edge>
    <edge source="138" target="302">
      <data key="d8">152</data>
    </edge>
    <edge source="138" target="303">
      <data key="d8">163</data>
    </edge>
    <edge source="138" target="308">
      <data key="d8">513</data>
    </edge>
    <edge source="138" target="309">
      <data key="d8">66</data>
    </edge>
    <edge source="138" target="265">
      <data key="d8">721</data>
    </edge>
    <edge source="138" target="202">
      <data key="d8">1714</data>
    </edge>
    <edge source="138" target="192">
      <data key="d8">6</data>
    </edge>
    <edge source="138" target="193">
      <data key="d8">3</data>
    </edge>
    <edge source="138" target="194">
      <data key="d8">621</data>
    </edge>
    <edge source="138" target="196">
      <data key="d8">74</data>
    </edge>
    <edge source="138" target="199">
      <data key="d8">21</data>
    </edge>
    <edge source="138" target="200">
      <data key="d8">2040</data>
    </edge>
    <edge source="138" target="201">
      <data key="d8">3995</data>
    </edge>
    <edge source="138" target="203">
      <data key="d8">1075</data>
    </edge>
    <edge source="138" target="204">
      <data key="d8">20</data>
    </edge>
    <edge source="138" target="206">
      <data key="d8">433</data>
    </edge>
    <edge source="138" target="207">
      <data key="d8">1916</data>
    </edge>
    <edge source="138" target="208">
      <data key="d8">2708</data>
    </edge>
    <edge source="138" target="209">
      <data key="d8">1852</data>
    </edge>
    <edge source="138" target="215">
      <data key="d8">13</data>
    </edge>
    <edge source="138" target="267">
      <data key="d8">442</data>
    </edge>
    <edge source="138" target="195">
      <data key="d8">22</data>
    </edge>
    <edge source="138" target="259">
      <data key="d8">131</data>
    </edge>
    <edge source="138" target="210">
      <data key="d8">1055</data>
    </edge>
    <edge source="138" target="258">
      <data key="d8">170</data>
    </edge>
    <edge source="139" target="265">
      <data key="d8">245</data>
    </edge>
    <edge source="139" target="266">
      <data key="d8">422</data>
    </edge>
    <edge source="139" target="267">
      <data key="d8">602</data>
    </edge>
    <edge source="139" target="140">
      <data key="d8">1266</data>
    </edge>
    <edge source="139" target="146">
      <data key="d8">234</data>
    </edge>
    <edge source="139" target="147">
      <data key="d8">546</data>
    </edge>
    <edge source="139" target="148">
      <data key="d8">797</data>
    </edge>
    <edge source="139" target="308">
      <data key="d8">91</data>
    </edge>
    <edge source="139" target="309">
      <data key="d8">275</data>
    </edge>
    <edge source="139" target="195">
      <data key="d8">287</data>
    </edge>
    <edge source="139" target="201">
      <data key="d8">301</data>
    </edge>
    <edge source="139" target="202">
      <data key="d8">554</data>
    </edge>
    <edge source="139" target="207">
      <data key="d8">90</data>
    </edge>
    <edge source="139" target="208">
      <data key="d8">282</data>
    </edge>
    <edge source="139" target="209">
      <data key="d8">282</data>
    </edge>
    <edge source="139" target="210">
      <data key="d8">604</data>
    </edge>
    <edge source="139" target="203">
      <data key="d8">72</data>
    </edge>
    <edge source="140" target="258">
      <data key="d8">11</data>
    </edge>
    <edge source="140" target="259">
      <data key="d8">48</data>
    </edge>
    <edge source="140" target="260">
      <data key="d8">48</data>
    </edge>
    <edge source="140" target="266">
      <data key="d8">544</data>
    </edge>
    <edge source="140" target="141">
      <data key="d8">1182</data>
    </edge>
    <edge source="140" target="144">
      <data key="d8">23</data>
    </edge>
    <edge source="140" target="145">
      <data key="d8">2</data>
    </edge>
    <edge source="140" target="146">
      <data key="d8">149</data>
    </edge>
    <edge source="140" target="148">
      <data key="d8">2120</data>
    </edge>
    <edge source="140" target="149">
      <data key="d8">94</data>
    </edge>
    <edge source="140" target="150">
      <data key="d8">189</data>
    </edge>
    <edge source="140" target="303">
      <data key="d8">48</data>
    </edge>
    <edge source="140" target="308">
      <data key="d8">70</data>
    </edge>
    <edge source="140" target="309">
      <data key="d8">512</data>
    </edge>
    <edge source="140" target="265">
      <data key="d8">230</data>
    </edge>
    <edge source="140" target="194">
      <data key="d8">49</data>
    </edge>
    <edge source="140" target="267">
      <data key="d8">1009</data>
    </edge>
    <edge source="140" target="196">
      <data key="d8">1055</data>
    </edge>
    <edge source="140" target="197">
      <data key="d8">57</data>
    </edge>
    <edge source="140" target="200">
      <data key="d8">978</data>
    </edge>
    <edge source="140" target="201">
      <data key="d8">1917</data>
    </edge>
    <edge source="140" target="202">
      <data key="d8">1573</data>
    </edge>
    <edge source="140" target="206">
      <data key="d8">112</data>
    </edge>
    <edge source="140" target="207">
      <data key="d8">523</data>
    </edge>
    <edge source="140" target="208">
      <data key="d8">1375</data>
    </edge>
    <edge source="140" target="209">
      <data key="d8">1608</data>
    </edge>
    <edge source="140" target="210">
      <data key="d8">2883</data>
    </edge>
    <edge source="140" target="212">
      <data key="d8">125</data>
    </edge>
    <edge source="140" target="203">
      <data key="d8">4994</data>
    </edge>
    <edge source="140" target="218">
      <data key="d8">114</data>
    </edge>
    <edge source="140" target="195">
      <data key="d8">672</data>
    </edge>
    <edge source="140" target="211">
      <data key="d8">384</data>
    </edge>
    <edge source="140" target="204">
      <data key="d8">1721</data>
    </edge>
    <edge source="141" target="260">
      <data key="d8">131</data>
    </edge>
    <edge source="141" target="142">
      <data key="d8">39</data>
    </edge>
    <edge source="141" target="259">
      <data key="d8">248</data>
    </edge>
    <edge source="141" target="148">
      <data key="d8">24</data>
    </edge>
    <edge source="141" target="149">
      <data key="d8">216</data>
    </edge>
    <edge source="141" target="150">
      <data key="d8">19</data>
    </edge>
    <edge source="141" target="303">
      <data key="d8">13</data>
    </edge>
    <edge source="141" target="266">
      <data key="d8">1</data>
    </edge>
    <edge source="141" target="190">
      <data key="d8">414</data>
    </edge>
    <edge source="141" target="195">
      <data key="d8">1575</data>
    </edge>
    <edge source="141" target="196">
      <data key="d8">1476</data>
    </edge>
    <edge source="141" target="197">
      <data key="d8">39</data>
    </edge>
    <edge source="141" target="200">
      <data key="d8">59</data>
    </edge>
    <edge source="141" target="201">
      <data key="d8">61</data>
    </edge>
    <edge source="141" target="202">
      <data key="d8">1065</data>
    </edge>
    <edge source="141" target="203">
      <data key="d8">3046</data>
    </edge>
    <edge source="141" target="204">
      <data key="d8">3227</data>
    </edge>
    <edge source="141" target="208">
      <data key="d8">55</data>
    </edge>
    <edge source="141" target="209">
      <data key="d8">55</data>
    </edge>
    <edge source="141" target="210">
      <data key="d8">98</data>
    </edge>
    <edge source="141" target="211">
      <data key="d8">39</data>
    </edge>
    <edge source="141" target="212">
      <data key="d8">2</data>
    </edge>
    <edge source="141" target="253">
      <data key="d8">14</data>
    </edge>
    <edge source="142" target="212">
      <data key="d8">1</data>
    </edge>
    <edge source="142" target="204">
      <data key="d8">40</data>
    </edge>
    <edge source="142" target="150">
      <data key="d8">20</data>
    </edge>
    <edge source="142" target="205">
      <data key="d8">41</data>
    </edge>
    <edge source="144" target="265">
      <data key="d8">50</data>
    </edge>
    <edge source="144" target="267">
      <data key="d8">2</data>
    </edge>
    <edge source="144" target="145">
      <data key="d8">1007</data>
    </edge>
    <edge source="144" target="148">
      <data key="d8">55</data>
    </edge>
    <edge source="144" target="152">
      <data key="d8">431</data>
    </edge>
    <edge source="144" target="153">
      <data key="d8">173</data>
    </edge>
    <edge source="144" target="154">
      <data key="d8">50</data>
    </edge>
    <edge source="144" target="308">
      <data key="d8">46</data>
    </edge>
    <edge source="144" target="309">
      <data key="d8">38</data>
    </edge>
    <edge source="144" target="199">
      <data key="d8">208</data>
    </edge>
    <edge source="144" target="200">
      <data key="d8">326</data>
    </edge>
    <edge source="144" target="201">
      <data key="d8">7</data>
    </edge>
    <edge source="144" target="203">
      <data key="d8">26</data>
    </edge>
    <edge source="144" target="206">
      <data key="d8">491</data>
    </edge>
    <edge source="144" target="207">
      <data key="d8">983</data>
    </edge>
    <edge source="144" target="209">
      <data key="d8">92</data>
    </edge>
    <edge source="144" target="210">
      <data key="d8">92</data>
    </edge>
    <edge source="144" target="208">
      <data key="d8">149</data>
    </edge>
    <edge source="145" target="258">
      <data key="d8">25</data>
    </edge>
    <edge source="145" target="201">
      <data key="d8">97</data>
    </edge>
    <edge source="145" target="265">
      <data key="d8">107</data>
    </edge>
    <edge source="145" target="266">
      <data key="d8">1</data>
    </edge>
    <edge source="145" target="267">
      <data key="d8">1</data>
    </edge>
    <edge source="145" target="146">
      <data key="d8">494</data>
    </edge>
    <edge source="145" target="148">
      <data key="d8">21</data>
    </edge>
    <edge source="145" target="152">
      <data key="d8">391</data>
    </edge>
    <edge source="145" target="153">
      <data key="d8">2812</data>
    </edge>
    <edge source="145" target="154">
      <data key="d8">844</data>
    </edge>
    <edge source="145" target="155">
      <data key="d8">2</data>
    </edge>
    <edge source="145" target="156">
      <data key="d8">23</data>
    </edge>
    <edge source="145" target="218">
      <data key="d8">9</data>
    </edge>
    <edge source="145" target="302">
      <data key="d8">13</data>
    </edge>
    <edge source="145" target="303">
      <data key="d8">2</data>
    </edge>
    <edge source="145" target="264">
      <data key="d8">3</data>
    </edge>
    <edge source="145" target="308">
      <data key="d8">107</data>
    </edge>
    <edge source="145" target="309">
      <data key="d8">31</data>
    </edge>
    <edge source="145" target="200">
      <data key="d8">691</data>
    </edge>
    <edge source="145" target="203">
      <data key="d8">8</data>
    </edge>
    <edge source="145" target="206">
      <data key="d8">557</data>
    </edge>
    <edge source="145" target="207">
      <data key="d8">3811</data>
    </edge>
    <edge source="145" target="208">
      <data key="d8">151</data>
    </edge>
    <edge source="145" target="210">
      <data key="d8">38</data>
    </edge>
    <edge source="145" target="215">
      <data key="d8">596</data>
    </edge>
    <edge source="145" target="209">
      <data key="d8">29</data>
    </edge>
    <edge source="146" target="264">
      <data key="d8">6</data>
    </edge>
    <edge source="146" target="265">
      <data key="d8">4610</data>
    </edge>
    <edge source="146" target="267">
      <data key="d8">4600</data>
    </edge>
    <edge source="146" target="272">
      <data key="d8">27</data>
    </edge>
    <edge source="146" target="274">
      <data key="d8">25</data>
    </edge>
    <edge source="146" target="147">
      <data key="d8">3842</data>
    </edge>
    <edge source="146" target="148">
      <data key="d8">1646</data>
    </edge>
    <edge source="146" target="217">
      <data key="d8">38</data>
    </edge>
    <edge source="146" target="153">
      <data key="d8">74</data>
    </edge>
    <edge source="146" target="154">
      <data key="d8">3352</data>
    </edge>
    <edge source="146" target="155">
      <data key="d8">202</data>
    </edge>
    <edge source="146" target="156">
      <data key="d8">20</data>
    </edge>
    <edge source="146" target="161">
      <data key="d8">106</data>
    </edge>
    <edge source="146" target="209">
      <data key="d8">5585</data>
    </edge>
    <edge source="146" target="308">
      <data key="d8">878</data>
    </edge>
    <edge source="146" target="309">
      <data key="d8">2935</data>
    </edge>
    <edge source="146" target="314">
      <data key="d8">5</data>
    </edge>
    <edge source="146" target="315">
      <data key="d8">5</data>
    </edge>
    <edge source="146" target="266">
      <data key="d8">3096</data>
    </edge>
    <edge source="146" target="203">
      <data key="d8">44</data>
    </edge>
    <edge source="146" target="206">
      <data key="d8">529</data>
    </edge>
    <edge source="146" target="207">
      <data key="d8">4548</data>
    </edge>
    <edge source="146" target="208">
      <data key="d8">9202</data>
    </edge>
    <edge source="146" target="210">
      <data key="d8">3750</data>
    </edge>
    <edge source="146" target="215">
      <data key="d8">1026</data>
    </edge>
    <edge source="146" target="216">
      <data key="d8">2166</data>
    </edge>
    <edge source="146" target="218">
      <data key="d8">15</data>
    </edge>
    <edge source="146" target="219">
      <data key="d8">1</data>
    </edge>
    <edge source="146" target="223">
      <data key="d8">106</data>
    </edge>
    <edge source="146" target="273">
      <data key="d8">11</data>
    </edge>
    <edge source="147" target="265">
      <data key="d8">2261</data>
    </edge>
    <edge source="147" target="266">
      <data key="d8">3113</data>
    </edge>
    <edge source="147" target="267">
      <data key="d8">5037</data>
    </edge>
    <edge source="147" target="272">
      <data key="d8">205</data>
    </edge>
    <edge source="147" target="273">
      <data key="d8">6</data>
    </edge>
    <edge source="147" target="148">
      <data key="d8">5399</data>
    </edge>
    <edge source="147" target="154">
      <data key="d8">1768</data>
    </edge>
    <edge source="147" target="155">
      <data key="d8">3130</data>
    </edge>
    <edge source="147" target="156">
      <data key="d8">1543</data>
    </edge>
    <edge source="147" target="218">
      <data key="d8">2248</data>
    </edge>
    <edge source="147" target="274">
      <data key="d8">368</data>
    </edge>
    <edge source="147" target="308">
      <data key="d8">139</data>
    </edge>
    <edge source="147" target="309">
      <data key="d8">2880</data>
    </edge>
    <edge source="147" target="207">
      <data key="d8">907</data>
    </edge>
    <edge source="147" target="208">
      <data key="d8">3676</data>
    </edge>
    <edge source="147" target="209">
      <data key="d8">4635</data>
    </edge>
    <edge source="147" target="215">
      <data key="d8">42</data>
    </edge>
    <edge source="147" target="216">
      <data key="d8">1621</data>
    </edge>
    <edge source="147" target="217">
      <data key="d8">537</data>
    </edge>
    <edge source="147" target="210">
      <data key="d8">6021</data>
    </edge>
    <edge source="148" target="260">
      <data key="d8">15</data>
    </edge>
    <edge source="148" target="267">
      <data key="d8">6815</data>
    </edge>
    <edge source="148" target="275">
      <data key="d8">4</data>
    </edge>
    <edge source="148" target="276">
      <data key="d8">4</data>
    </edge>
    <edge source="148" target="149">
      <data key="d8">542</data>
    </edge>
    <edge source="148" target="218">
      <data key="d8">1216</data>
    </edge>
    <edge source="148" target="154">
      <data key="d8">139</data>
    </edge>
    <edge source="148" target="155">
      <data key="d8">82</data>
    </edge>
    <edge source="148" target="156">
      <data key="d8">3261</data>
    </edge>
    <edge source="148" target="157">
      <data key="d8">416</data>
    </edge>
    <edge source="148" target="219">
      <data key="d8">266</data>
    </edge>
    <edge source="148" target="164">
      <data key="d8">3</data>
    </edge>
    <edge source="148" target="165">
      <data key="d8">3</data>
    </edge>
    <edge source="148" target="220">
      <data key="d8">11</data>
    </edge>
    <edge source="148" target="308">
      <data key="d8">276</data>
    </edge>
    <edge source="148" target="309">
      <data key="d8">4415</data>
    </edge>
    <edge source="148" target="310">
      <data key="d8">8</data>
    </edge>
    <edge source="148" target="265">
      <data key="d8">1960</data>
    </edge>
    <edge source="148" target="266">
      <data key="d8">4720</data>
    </edge>
    <edge source="148" target="211">
      <data key="d8">885</data>
    </edge>
    <edge source="148" target="200">
      <data key="d8">392</data>
    </edge>
    <edge source="148" target="201">
      <data key="d8">417</data>
    </edge>
    <edge source="148" target="202">
      <data key="d8">106</data>
    </edge>
    <edge source="148" target="311">
      <data key="d8">7</data>
    </edge>
    <edge source="148" target="204">
      <data key="d8">269</data>
    </edge>
    <edge source="148" target="206">
      <data key="d8">125</data>
    </edge>
    <edge source="148" target="207">
      <data key="d8">1451</data>
    </edge>
    <edge source="148" target="208">
      <data key="d8">3411</data>
    </edge>
    <edge source="148" target="209">
      <data key="d8">3412</data>
    </edge>
    <edge source="148" target="203">
      <data key="d8">452</data>
    </edge>
    <edge source="148" target="215">
      <data key="d8">1</data>
    </edge>
    <edge source="148" target="216">
      <data key="d8">139</data>
    </edge>
    <edge source="148" target="217">
      <data key="d8">1</data>
    </edge>
    <edge source="148" target="274">
      <data key="d8">141</data>
    </edge>
    <edge source="148" target="210">
      <data key="d8">10811</data>
    </edge>
    <edge source="149" target="259">
      <data key="d8">10</data>
    </edge>
    <edge source="149" target="260">
      <data key="d8">10</data>
    </edge>
    <edge source="149" target="265">
      <data key="d8">8</data>
    </edge>
    <edge source="149" target="267">
      <data key="d8">10</data>
    </edge>
    <edge source="149" target="150">
      <data key="d8">261</data>
    </edge>
    <edge source="149" target="156">
      <data key="d8">69</data>
    </edge>
    <edge source="149" target="157">
      <data key="d8">1104</data>
    </edge>
    <edge source="149" target="158">
      <data key="d8">238</data>
    </edge>
    <edge source="149" target="303">
      <data key="d8">10</data>
    </edge>
    <edge source="149" target="308">
      <data key="d8">8</data>
    </edge>
    <edge source="149" target="309">
      <data key="d8">8</data>
    </edge>
    <edge source="149" target="200">
      <data key="d8">4</data>
    </edge>
    <edge source="149" target="201">
      <data key="d8">4</data>
    </edge>
    <edge source="149" target="203">
      <data key="d8">570</data>
    </edge>
    <edge source="149" target="204">
      <data key="d8">697</data>
    </edge>
    <edge source="149" target="208">
      <data key="d8">18</data>
    </edge>
    <edge source="149" target="209">
      <data key="d8">18</data>
    </edge>
    <edge source="149" target="210">
      <data key="d8">440</data>
    </edge>
    <edge source="149" target="211">
      <data key="d8">750</data>
    </edge>
    <edge source="150" target="259">
      <data key="d8">169</data>
    </edge>
    <edge source="150" target="260">
      <data key="d8">169</data>
    </edge>
    <edge source="150" target="157">
      <data key="d8">6</data>
    </edge>
    <edge source="150" target="158">
      <data key="d8">22</data>
    </edge>
    <edge source="150" target="303">
      <data key="d8">169</data>
    </edge>
    <edge source="150" target="196">
      <data key="d8">2</data>
    </edge>
    <edge source="150" target="200">
      <data key="d8">8</data>
    </edge>
    <edge source="150" target="201">
      <data key="d8">8</data>
    </edge>
    <edge source="150" target="203">
      <data key="d8">393</data>
    </edge>
    <edge source="150" target="204">
      <data key="d8">567</data>
    </edge>
    <edge source="150" target="205">
      <data key="d8">37</data>
    </edge>
    <edge source="150" target="208">
      <data key="d8">8</data>
    </edge>
    <edge source="150" target="209">
      <data key="d8">8</data>
    </edge>
    <edge source="150" target="210">
      <data key="d8">8</data>
    </edge>
    <edge source="150" target="211">
      <data key="d8">510</data>
    </edge>
    <edge source="150" target="212">
      <data key="d8">405</data>
    </edge>
    <edge source="151" target="152">
      <data key="d8">14</data>
    </edge>
    <edge source="152" target="263">
      <data key="d8">10</data>
    </edge>
    <edge source="152" target="264">
      <data key="d8">27</data>
    </edge>
    <edge source="152" target="265">
      <data key="d8">34</data>
    </edge>
    <edge source="152" target="271">
      <data key="d8">3</data>
    </edge>
    <edge source="152" target="272">
      <data key="d8">34</data>
    </edge>
    <edge source="152" target="153">
      <data key="d8">3851</data>
    </edge>
    <edge source="152" target="154">
      <data key="d8">73</data>
    </edge>
    <edge source="152" target="156">
      <data key="d8">2</data>
    </edge>
    <edge source="152" target="160">
      <data key="d8">1504</data>
    </edge>
    <edge source="152" target="161">
      <data key="d8">814</data>
    </edge>
    <edge source="152" target="163">
      <data key="d8">1</data>
    </edge>
    <edge source="152" target="164">
      <data key="d8">2</data>
    </edge>
    <edge source="152" target="308">
      <data key="d8">2</data>
    </edge>
    <edge source="152" target="214">
      <data key="d8">391</data>
    </edge>
    <edge source="152" target="215">
      <data key="d8">345</data>
    </edge>
    <edge source="152" target="216">
      <data key="d8">73</data>
    </edge>
    <edge source="152" target="222">
      <data key="d8">15</data>
    </edge>
    <edge source="152" target="224">
      <data key="d8">2</data>
    </edge>
    <edge source="152" target="225">
      <data key="d8">2</data>
    </edge>
    <edge source="152" target="226">
      <data key="d8">1</data>
    </edge>
    <edge source="153" target="263">
      <data key="d8">114</data>
    </edge>
    <edge source="153" target="264">
      <data key="d8">1980</data>
    </edge>
    <edge source="153" target="265">
      <data key="d8">2248</data>
    </edge>
    <edge source="153" target="267">
      <data key="d8">55</data>
    </edge>
    <edge source="153" target="271">
      <data key="d8">1663</data>
    </edge>
    <edge source="153" target="154">
      <data key="d8">7254</data>
    </edge>
    <edge source="153" target="155">
      <data key="d8">478</data>
    </edge>
    <edge source="153" target="156">
      <data key="d8">895</data>
    </edge>
    <edge source="153" target="160">
      <data key="d8">3326</data>
    </edge>
    <edge source="153" target="161">
      <data key="d8">7597</data>
    </edge>
    <edge source="153" target="162">
      <data key="d8">1255</data>
    </edge>
    <edge source="153" target="163">
      <data key="d8">1185</data>
    </edge>
    <edge source="153" target="164">
      <data key="d8">1207</data>
    </edge>
    <edge source="153" target="168">
      <data key="d8">86</data>
    </edge>
    <edge source="153" target="274">
      <data key="d8">86</data>
    </edge>
    <edge source="153" target="307">
      <data key="d8">134</data>
    </edge>
    <edge source="153" target="308">
      <data key="d8">1879</data>
    </edge>
    <edge source="153" target="309">
      <data key="d8">48</data>
    </edge>
    <edge source="153" target="310">
      <data key="d8">14</data>
    </edge>
    <edge source="153" target="313">
      <data key="d8">371</data>
    </edge>
    <edge source="153" target="314">
      <data key="d8">289</data>
    </edge>
    <edge source="153" target="315">
      <data key="d8">56</data>
    </edge>
    <edge source="153" target="316">
      <data key="d8">56</data>
    </edge>
    <edge source="153" target="266">
      <data key="d8">34</data>
    </edge>
    <edge source="153" target="224">
      <data key="d8">1009</data>
    </edge>
    <edge source="153" target="219">
      <data key="d8">10</data>
    </edge>
    <edge source="153" target="226">
      <data key="d8">211</data>
    </edge>
    <edge source="153" target="206">
      <data key="d8">564</data>
    </edge>
    <edge source="153" target="207">
      <data key="d8">4171</data>
    </edge>
    <edge source="153" target="208">
      <data key="d8">31</data>
    </edge>
    <edge source="153" target="341">
      <data key="d8">56</data>
    </edge>
    <edge source="153" target="214">
      <data key="d8">163</data>
    </edge>
    <edge source="153" target="215">
      <data key="d8">7115</data>
    </edge>
    <edge source="153" target="216">
      <data key="d8">2702</data>
    </edge>
    <edge source="153" target="217">
      <data key="d8">258</data>
    </edge>
    <edge source="153" target="222">
      <data key="d8">26</data>
    </edge>
    <edge source="153" target="223">
      <data key="d8">948</data>
    </edge>
    <edge source="153" target="225">
      <data key="d8">753</data>
    </edge>
    <edge source="153" target="210">
      <data key="d8">74</data>
    </edge>
    <edge source="153" target="272">
      <data key="d8">1201</data>
    </edge>
    <edge source="153" target="218">
      <data key="d8">361</data>
    </edge>
    <edge source="154" target="263">
      <data key="d8">158</data>
    </edge>
    <edge source="154" target="264">
      <data key="d8">2077</data>
    </edge>
    <edge source="154" target="265">
      <data key="d8">8868</data>
    </edge>
    <edge source="154" target="266">
      <data key="d8">3610</data>
    </edge>
    <edge source="154" target="267">
      <data key="d8">4999</data>
    </edge>
    <edge source="154" target="273">
      <data key="d8">221</data>
    </edge>
    <edge source="154" target="271">
      <data key="d8">1133</data>
    </edge>
    <edge source="154" target="274">
      <data key="d8">743</data>
    </edge>
    <edge source="154" target="217">
      <data key="d8">2358</data>
    </edge>
    <edge source="154" target="155">
      <data key="d8">5582</data>
    </edge>
    <edge source="154" target="156">
      <data key="d8">3855</data>
    </edge>
    <edge source="154" target="218">
      <data key="d8">2070</data>
    </edge>
    <edge source="154" target="160">
      <data key="d8">259</data>
    </edge>
    <edge source="154" target="161">
      <data key="d8">2840</data>
    </edge>
    <edge source="154" target="162">
      <data key="d8">2191</data>
    </edge>
    <edge source="154" target="163">
      <data key="d8">2189</data>
    </edge>
    <edge source="154" target="164">
      <data key="d8">2076</data>
    </edge>
    <edge source="154" target="168">
      <data key="d8">25</data>
    </edge>
    <edge source="154" target="307">
      <data key="d8">12</data>
    </edge>
    <edge source="154" target="308">
      <data key="d8">3957</data>
    </edge>
    <edge source="154" target="309">
      <data key="d8">3760</data>
    </edge>
    <edge source="154" target="310">
      <data key="d8">87</data>
    </edge>
    <edge source="154" target="313">
      <data key="d8">28</data>
    </edge>
    <edge source="154" target="314">
      <data key="d8">217</data>
    </edge>
    <edge source="154" target="315">
      <data key="d8">91</data>
    </edge>
    <edge source="154" target="316">
      <data key="d8">52</data>
    </edge>
    <edge source="154" target="224">
      <data key="d8">834</data>
    </edge>
    <edge source="154" target="225">
      <data key="d8">955</data>
    </edge>
    <edge source="154" target="219">
      <data key="d8">35</data>
    </edge>
    <edge source="154" target="226">
      <data key="d8">190</data>
    </edge>
    <edge source="154" target="206">
      <data key="d8">53</data>
    </edge>
    <edge source="154" target="207">
      <data key="d8">3930</data>
    </edge>
    <edge source="154" target="208">
      <data key="d8">4877</data>
    </edge>
    <edge source="154" target="210">
      <data key="d8">2285</data>
    </edge>
    <edge source="154" target="341">
      <data key="d8">20</data>
    </edge>
    <edge source="154" target="215">
      <data key="d8">4437</data>
    </edge>
    <edge source="154" target="216">
      <data key="d8">13125</data>
    </edge>
    <edge source="154" target="223">
      <data key="d8">159</data>
    </edge>
    <edge source="154" target="209">
      <data key="d8">4460</data>
    </edge>
    <edge source="154" target="272">
      <data key="d8">5473</data>
    </edge>
    <edge source="154" target="211">
      <data key="d8">1</data>
    </edge>
    <edge source="155" target="263">
      <data key="d8">58</data>
    </edge>
    <edge source="155" target="264">
      <data key="d8">245</data>
    </edge>
    <edge source="155" target="265">
      <data key="d8">2174</data>
    </edge>
    <edge source="155" target="266">
      <data key="d8">3419</data>
    </edge>
    <edge source="155" target="267">
      <data key="d8">7149</data>
    </edge>
    <edge source="155" target="271">
      <data key="d8">18</data>
    </edge>
    <edge source="155" target="272">
      <data key="d8">1650</data>
    </edge>
    <edge source="155" target="156">
      <data key="d8">10144</data>
    </edge>
    <edge source="155" target="218">
      <data key="d8">7585</data>
    </edge>
    <edge source="155" target="161">
      <data key="d8">371</data>
    </edge>
    <edge source="155" target="162">
      <data key="d8">712</data>
    </edge>
    <edge source="155" target="163">
      <data key="d8">1104</data>
    </edge>
    <edge source="155" target="164">
      <data key="d8">1515</data>
    </edge>
    <edge source="155" target="210">
      <data key="d8">3296</data>
    </edge>
    <edge source="155" target="308">
      <data key="d8">552</data>
    </edge>
    <edge source="155" target="309">
      <data key="d8">5977</data>
    </edge>
    <edge source="155" target="310">
      <data key="d8">2359</data>
    </edge>
    <edge source="155" target="313">
      <data key="d8">3</data>
    </edge>
    <edge source="155" target="314">
      <data key="d8">7</data>
    </edge>
    <edge source="155" target="315">
      <data key="d8">142</data>
    </edge>
    <edge source="155" target="316">
      <data key="d8">93</data>
    </edge>
    <edge source="155" target="207">
      <data key="d8">128</data>
    </edge>
    <edge source="155" target="208">
      <data key="d8">1528</data>
    </edge>
    <edge source="155" target="209">
      <data key="d8">2717</data>
    </edge>
    <edge source="155" target="341">
      <data key="d8">4</data>
    </edge>
    <edge source="155" target="215">
      <data key="d8">176</data>
    </edge>
    <edge source="155" target="216">
      <data key="d8">4407</data>
    </edge>
    <edge source="155" target="217">
      <data key="d8">2416</data>
    </edge>
    <edge source="155" target="223">
      <data key="d8">9</data>
    </edge>
    <edge source="155" target="224">
      <data key="d8">315</data>
    </edge>
    <edge source="155" target="225">
      <data key="d8">475</data>
    </edge>
    <edge source="155" target="273">
      <data key="d8">31</data>
    </edge>
    <edge source="155" target="274">
      <data key="d8">3711</data>
    </edge>
    <edge source="156" target="260">
      <data key="d8">15</data>
    </edge>
    <edge source="156" target="341">
      <data key="d8">4</data>
    </edge>
    <edge source="156" target="263">
      <data key="d8">58</data>
    </edge>
    <edge source="156" target="264">
      <data key="d8">227</data>
    </edge>
    <edge source="156" target="265">
      <data key="d8">888</data>
    </edge>
    <edge source="156" target="266">
      <data key="d8">5638</data>
    </edge>
    <edge source="156" target="267">
      <data key="d8">11900</data>
    </edge>
    <edge source="156" target="271">
      <data key="d8">7</data>
    </edge>
    <edge source="156" target="272">
      <data key="d8">1076</data>
    </edge>
    <edge source="156" target="276">
      <data key="d8">5</data>
    </edge>
    <edge source="156" target="281">
      <data key="d8">72</data>
    </edge>
    <edge source="156" target="282">
      <data key="d8">13</data>
    </edge>
    <edge source="156" target="160">
      <data key="d8">2</data>
    </edge>
    <edge source="156" target="161">
      <data key="d8">753</data>
    </edge>
    <edge source="156" target="162">
      <data key="d8">1046</data>
    </edge>
    <edge source="156" target="163">
      <data key="d8">1442</data>
    </edge>
    <edge source="156" target="164">
      <data key="d8">5626</data>
    </edge>
    <edge source="156" target="210">
      <data key="d8">7634</data>
    </edge>
    <edge source="156" target="220">
      <data key="d8">21</data>
    </edge>
    <edge source="156" target="172">
      <data key="d8">230</data>
    </edge>
    <edge source="156" target="157">
      <data key="d8">3526</data>
    </edge>
    <edge source="156" target="308">
      <data key="d8">83</data>
    </edge>
    <edge source="156" target="309">
      <data key="d8">8826</data>
    </edge>
    <edge source="156" target="310">
      <data key="d8">4172</data>
    </edge>
    <edge source="156" target="311">
      <data key="d8">7</data>
    </edge>
    <edge source="156" target="313">
      <data key="d8">3</data>
    </edge>
    <edge source="156" target="314">
      <data key="d8">7</data>
    </edge>
    <edge source="156" target="315">
      <data key="d8">203</data>
    </edge>
    <edge source="156" target="316">
      <data key="d8">494</data>
    </edge>
    <edge source="156" target="323">
      <data key="d8">25</data>
    </edge>
    <edge source="156" target="324">
      <data key="d8">28</data>
    </edge>
    <edge source="156" target="275">
      <data key="d8">5</data>
    </edge>
    <edge source="156" target="203">
      <data key="d8">25</data>
    </edge>
    <edge source="156" target="207">
      <data key="d8">244</data>
    </edge>
    <edge source="156" target="208">
      <data key="d8">618</data>
    </edge>
    <edge source="156" target="209">
      <data key="d8">1440</data>
    </edge>
    <edge source="156" target="211">
      <data key="d8">985</data>
    </edge>
    <edge source="156" target="215">
      <data key="d8">227</data>
    </edge>
    <edge source="156" target="216">
      <data key="d8">2951</data>
    </edge>
    <edge source="156" target="217">
      <data key="d8">1757</data>
    </edge>
    <edge source="156" target="218">
      <data key="d8">14822</data>
    </edge>
    <edge source="156" target="219">
      <data key="d8">1224</data>
    </edge>
    <edge source="156" target="223">
      <data key="d8">13</data>
    </edge>
    <edge source="156" target="224">
      <data key="d8">631</data>
    </edge>
    <edge source="156" target="225">
      <data key="d8">805</data>
    </edge>
    <edge source="156" target="226">
      <data key="d8">912</data>
    </edge>
    <edge source="156" target="165">
      <data key="d8">2798</data>
    </edge>
    <edge source="156" target="273">
      <data key="d8">27</data>
    </edge>
    <edge source="156" target="274">
      <data key="d8">6848</data>
    </edge>
    <edge source="156" target="166">
      <data key="d8">41</data>
    </edge>
    <edge source="157" target="266">
      <data key="d8">166</data>
    </edge>
    <edge source="157" target="267">
      <data key="d8">327</data>
    </edge>
    <edge source="157" target="274">
      <data key="d8">172</data>
    </edge>
    <edge source="157" target="158">
      <data key="d8">1826</data>
    </edge>
    <edge source="157" target="163">
      <data key="d8">4</data>
    </edge>
    <edge source="157" target="164">
      <data key="d8">377</data>
    </edge>
    <edge source="157" target="165">
      <data key="d8">4673</data>
    </edge>
    <edge source="157" target="166">
      <data key="d8">736</data>
    </edge>
    <edge source="157" target="172">
      <data key="d8">124</data>
    </edge>
    <edge source="157" target="309">
      <data key="d8">241</data>
    </edge>
    <edge source="157" target="310">
      <data key="d8">171</data>
    </edge>
    <edge source="157" target="316">
      <data key="d8">23</data>
    </edge>
    <edge source="157" target="210">
      <data key="d8">180</data>
    </edge>
    <edge source="157" target="211">
      <data key="d8">7</data>
    </edge>
    <edge source="157" target="218">
      <data key="d8">436</data>
    </edge>
    <edge source="157" target="219">
      <data key="d8">208</data>
    </edge>
    <edge source="157" target="220">
      <data key="d8">144</data>
    </edge>
    <edge source="157" target="226">
      <data key="d8">2</data>
    </edge>
    <edge source="157" target="228">
      <data key="d8">1</data>
    </edge>
    <edge source="158" target="165">
      <data key="d8">391</data>
    </edge>
    <edge source="158" target="166">
      <data key="d8">232</data>
    </edge>
    <edge source="158" target="220">
      <data key="d8">168</data>
    </edge>
    <edge source="159" target="160">
      <data key="d8">1</data>
    </edge>
    <edge source="160" target="263">
      <data key="d8">38</data>
    </edge>
    <edge source="160" target="264">
      <data key="d8">79</data>
    </edge>
    <edge source="160" target="265">
      <data key="d8">109</data>
    </edge>
    <edge source="160" target="271">
      <data key="d8">327</data>
    </edge>
    <edge source="160" target="272">
      <data key="d8">2078</data>
    </edge>
    <edge source="160" target="277">
      <data key="d8">222</data>
    </edge>
    <edge source="160" target="278">
      <data key="d8">1424</data>
    </edge>
    <edge source="160" target="279">
      <data key="d8">1618</data>
    </edge>
    <edge source="160" target="161">
      <data key="d8">6468</data>
    </edge>
    <edge source="160" target="163">
      <data key="d8">1</data>
    </edge>
    <edge source="160" target="164">
      <data key="d8">2</data>
    </edge>
    <edge source="160" target="167">
      <data key="d8">28</data>
    </edge>
    <edge source="160" target="168">
      <data key="d8">3</data>
    </edge>
    <edge source="160" target="308">
      <data key="d8">4</data>
    </edge>
    <edge source="160" target="313">
      <data key="d8">2</data>
    </edge>
    <edge source="160" target="314">
      <data key="d8">1181</data>
    </edge>
    <edge source="160" target="321">
      <data key="d8">1</data>
    </edge>
    <edge source="160" target="225">
      <data key="d8">2</data>
    </edge>
    <edge source="160" target="340">
      <data key="d8">213</data>
    </edge>
    <edge source="160" target="214">
      <data key="d8">4</data>
    </edge>
    <edge source="160" target="215">
      <data key="d8">2179</data>
    </edge>
    <edge source="160" target="216">
      <data key="d8">266</data>
    </edge>
    <edge source="160" target="222">
      <data key="d8">1410</data>
    </edge>
    <edge source="160" target="223">
      <data key="d8">4232</data>
    </edge>
    <edge source="160" target="224">
      <data key="d8">140</data>
    </edge>
    <edge source="160" target="226">
      <data key="d8">1</data>
    </edge>
    <edge source="161" target="263">
      <data key="d8">104</data>
    </edge>
    <edge source="161" target="264">
      <data key="d8">1353</data>
    </edge>
    <edge source="161" target="265">
      <data key="d8">1279</data>
    </edge>
    <edge source="161" target="266">
      <data key="d8">6</data>
    </edge>
    <edge source="161" target="267">
      <data key="d8">8</data>
    </edge>
    <edge source="161" target="271">
      <data key="d8">2082</data>
    </edge>
    <edge source="161" target="272">
      <data key="d8">4553</data>
    </edge>
    <edge source="161" target="216">
      <data key="d8">2867</data>
    </edge>
    <edge source="161" target="277">
      <data key="d8">195</data>
    </edge>
    <edge source="161" target="278">
      <data key="d8">1701</data>
    </edge>
    <edge source="161" target="279">
      <data key="d8">1994</data>
    </edge>
    <edge source="161" target="285">
      <data key="d8">106</data>
    </edge>
    <edge source="161" target="237">
      <data key="d8">261</data>
    </edge>
    <edge source="161" target="162">
      <data key="d8">4720</data>
    </edge>
    <edge source="161" target="163">
      <data key="d8">1731</data>
    </edge>
    <edge source="161" target="164">
      <data key="d8">1699</data>
    </edge>
    <edge source="161" target="167">
      <data key="d8">36</data>
    </edge>
    <edge source="161" target="168">
      <data key="d8">6778</data>
    </edge>
    <edge source="161" target="169">
      <data key="d8">277</data>
    </edge>
    <edge source="161" target="175">
      <data key="d8">568</data>
    </edge>
    <edge source="161" target="176">
      <data key="d8">31</data>
    </edge>
    <edge source="161" target="307">
      <data key="d8">181</data>
    </edge>
    <edge source="161" target="308">
      <data key="d8">1073</data>
    </edge>
    <edge source="161" target="309">
      <data key="d8">6</data>
    </edge>
    <edge source="161" target="219">
      <data key="d8">2</data>
    </edge>
    <edge source="161" target="313">
      <data key="d8">1180</data>
    </edge>
    <edge source="161" target="314">
      <data key="d8">2861</data>
    </edge>
    <edge source="161" target="315">
      <data key="d8">26</data>
    </edge>
    <edge source="161" target="316">
      <data key="d8">26</data>
    </edge>
    <edge source="161" target="321">
      <data key="d8">124</data>
    </edge>
    <edge source="161" target="210">
      <data key="d8">8</data>
    </edge>
    <edge source="161" target="207">
      <data key="d8">787</data>
    </edge>
    <edge source="161" target="208">
      <data key="d8">170</data>
    </edge>
    <edge source="161" target="340">
      <data key="d8">216</data>
    </edge>
    <edge source="161" target="341">
      <data key="d8">26</data>
    </edge>
    <edge source="161" target="214">
      <data key="d8">12</data>
    </edge>
    <edge source="161" target="215">
      <data key="d8">8023</data>
    </edge>
    <edge source="161" target="217">
      <data key="d8">132</data>
    </edge>
    <edge source="161" target="222">
      <data key="d8">705</data>
    </edge>
    <edge source="161" target="223">
      <data key="d8">13553</data>
    </edge>
    <edge source="161" target="224">
      <data key="d8">5337</data>
    </edge>
    <edge source="161" target="225">
      <data key="d8">1040</data>
    </edge>
    <edge source="161" target="226">
      <data key="d8">264</data>
    </edge>
    <edge source="161" target="230">
      <data key="d8">1549</data>
    </edge>
    <edge source="161" target="231">
      <data key="d8">988</data>
    </edge>
    <edge source="161" target="274">
      <data key="d8">33</data>
    </edge>
    <edge source="161" target="238">
      <data key="d8">25</data>
    </edge>
    <edge source="161" target="218">
      <data key="d8">150</data>
    </edge>
    <edge source="162" target="263">
      <data key="d8">36</data>
    </edge>
    <edge source="162" target="264">
      <data key="d8">106</data>
    </edge>
    <edge source="162" target="265">
      <data key="d8">123</data>
    </edge>
    <edge source="162" target="267">
      <data key="d8">4</data>
    </edge>
    <edge source="162" target="271">
      <data key="d8">7</data>
    </edge>
    <edge source="162" target="272">
      <data key="d8">595</data>
    </edge>
    <edge source="162" target="274">
      <data key="d8">12</data>
    </edge>
    <edge source="162" target="278">
      <data key="d8">389</data>
    </edge>
    <edge source="162" target="279">
      <data key="d8">845</data>
    </edge>
    <edge source="162" target="285">
      <data key="d8">363</data>
    </edge>
    <edge source="162" target="163">
      <data key="d8">2214</data>
    </edge>
    <edge source="162" target="164">
      <data key="d8">1931</data>
    </edge>
    <edge source="162" target="167">
      <data key="d8">1</data>
    </edge>
    <edge source="162" target="168">
      <data key="d8">2653</data>
    </edge>
    <edge source="162" target="169">
      <data key="d8">1390</data>
    </edge>
    <edge source="162" target="175">
      <data key="d8">61</data>
    </edge>
    <edge source="162" target="176">
      <data key="d8">4</data>
    </edge>
    <edge source="162" target="308">
      <data key="d8">9</data>
    </edge>
    <edge source="162" target="310">
      <data key="d8">2</data>
    </edge>
    <edge source="162" target="313">
      <data key="d8">3</data>
    </edge>
    <edge source="162" target="314">
      <data key="d8">462</data>
    </edge>
    <edge source="162" target="315">
      <data key="d8">5</data>
    </edge>
    <edge source="162" target="316">
      <data key="d8">9</data>
    </edge>
    <edge source="162" target="321">
      <data key="d8">177</data>
    </edge>
    <edge source="162" target="226">
      <data key="d8">213</data>
    </edge>
    <edge source="162" target="340">
      <data key="d8">88</data>
    </edge>
    <edge source="162" target="341">
      <data key="d8">4</data>
    </edge>
    <edge source="162" target="215">
      <data key="d8">25</data>
    </edge>
    <edge source="162" target="216">
      <data key="d8">347</data>
    </edge>
    <edge source="162" target="217">
      <data key="d8">28</data>
    </edge>
    <edge source="162" target="218">
      <data key="d8">33</data>
    </edge>
    <edge source="162" target="223">
      <data key="d8">1942</data>
    </edge>
    <edge source="162" target="224">
      <data key="d8">3765</data>
    </edge>
    <edge source="162" target="225">
      <data key="d8">437</data>
    </edge>
    <edge source="162" target="230">
      <data key="d8">653</data>
    </edge>
    <edge source="162" target="231">
      <data key="d8">81</data>
    </edge>
    <edge source="162" target="237">
      <data key="d8">36</data>
    </edge>
    <edge source="162" target="238">
      <data key="d8">4</data>
    </edge>
    <edge source="163" target="263">
      <data key="d8">58</data>
    </edge>
    <edge source="163" target="264">
      <data key="d8">199</data>
    </edge>
    <edge source="163" target="265">
      <data key="d8">268</data>
    </edge>
    <edge source="163" target="267">
      <data key="d8">7</data>
    </edge>
    <edge source="163" target="271">
      <data key="d8">7</data>
    </edge>
    <edge source="163" target="272">
      <data key="d8">282</data>
    </edge>
    <edge source="163" target="273">
      <data key="d8">212</data>
    </edge>
    <edge source="163" target="274">
      <data key="d8">812</data>
    </edge>
    <edge source="163" target="281">
      <data key="d8">1055</data>
    </edge>
    <edge source="163" target="164">
      <data key="d8">4771</data>
    </edge>
    <edge source="163" target="165">
      <data key="d8">765</data>
    </edge>
    <edge source="163" target="169">
      <data key="d8">1</data>
    </edge>
    <edge source="163" target="170">
      <data key="d8">91</data>
    </edge>
    <edge source="163" target="171">
      <data key="d8">165</data>
    </edge>
    <edge source="163" target="172">
      <data key="d8">693</data>
    </edge>
    <edge source="163" target="310">
      <data key="d8">5</data>
    </edge>
    <edge source="163" target="313">
      <data key="d8">3</data>
    </edge>
    <edge source="163" target="314">
      <data key="d8">4</data>
    </edge>
    <edge source="163" target="315">
      <data key="d8">821</data>
    </edge>
    <edge source="163" target="316">
      <data key="d8">421</data>
    </edge>
    <edge source="163" target="288">
      <data key="d8">70</data>
    </edge>
    <edge source="163" target="322">
      <data key="d8">188</data>
    </edge>
    <edge source="163" target="323">
      <data key="d8">217</data>
    </edge>
    <edge source="163" target="308">
      <data key="d8">37</data>
    </edge>
    <edge source="163" target="226">
      <data key="d8">2660</data>
    </edge>
    <edge source="163" target="341">
      <data key="d8">278</data>
    </edge>
    <edge source="163" target="215">
      <data key="d8">21</data>
    </edge>
    <edge source="163" target="216">
      <data key="d8">679</data>
    </edge>
    <edge source="163" target="217">
      <data key="d8">47</data>
    </edge>
    <edge source="163" target="218">
      <data key="d8">54</data>
    </edge>
    <edge source="163" target="224">
      <data key="d8">323</data>
    </edge>
    <edge source="163" target="225">
      <data key="d8">3658</data>
    </edge>
    <edge source="163" target="232">
      <data key="d8">325</data>
    </edge>
    <edge source="163" target="233">
      <data key="d8">300</data>
    </edge>
    <edge source="163" target="234">
      <data key="d8">12</data>
    </edge>
    <edge source="163" target="240">
      <data key="d8">1</data>
    </edge>
    <edge source="164" target="263">
      <data key="d8">37</data>
    </edge>
    <edge source="164" target="264">
      <data key="d8">180</data>
    </edge>
    <edge source="164" target="265">
      <data key="d8">276</data>
    </edge>
    <edge source="164" target="266">
      <data key="d8">761</data>
    </edge>
    <edge source="164" target="267">
      <data key="d8">1882</data>
    </edge>
    <edge source="164" target="268">
      <data key="d8">7</data>
    </edge>
    <edge source="164" target="271">
      <data key="d8">5</data>
    </edge>
    <edge source="164" target="272">
      <data key="d8">276</data>
    </edge>
    <edge source="164" target="273">
      <data key="d8">19</data>
    </edge>
    <edge source="164" target="274">
      <data key="d8">2770</data>
    </edge>
    <edge source="164" target="275">
      <data key="d8">2</data>
    </edge>
    <edge source="164" target="281">
      <data key="d8">435</data>
    </edge>
    <edge source="164" target="280">
      <data key="d8">142</data>
    </edge>
    <edge source="164" target="282">
      <data key="d8">14</data>
    </edge>
    <edge source="164" target="288">
      <data key="d8">61</data>
    </edge>
    <edge source="164" target="165">
      <data key="d8">7291</data>
    </edge>
    <edge source="164" target="166">
      <data key="d8">16</data>
    </edge>
    <edge source="164" target="170">
      <data key="d8">69</data>
    </edge>
    <edge source="164" target="171">
      <data key="d8">4793</data>
    </edge>
    <edge source="164" target="172">
      <data key="d8">5708</data>
    </edge>
    <edge source="164" target="178">
      <data key="d8">10</data>
    </edge>
    <edge source="164" target="308">
      <data key="d8">60</data>
    </edge>
    <edge source="164" target="309">
      <data key="d8">1075</data>
    </edge>
    <edge source="164" target="310">
      <data key="d8">882</data>
    </edge>
    <edge source="164" target="283">
      <data key="d8">2</data>
    </edge>
    <edge source="164" target="315">
      <data key="d8">533</data>
    </edge>
    <edge source="164" target="316">
      <data key="d8">1203</data>
    </edge>
    <edge source="164" target="317">
      <data key="d8">23</data>
    </edge>
    <edge source="164" target="322">
      <data key="d8">61</data>
    </edge>
    <edge source="164" target="323">
      <data key="d8">81</data>
    </edge>
    <edge source="164" target="324">
      <data key="d8">25</data>
    </edge>
    <edge source="164" target="228">
      <data key="d8">8</data>
    </edge>
    <edge source="164" target="207">
      <data key="d8">3</data>
    </edge>
    <edge source="164" target="210">
      <data key="d8">418</data>
    </edge>
    <edge source="164" target="211">
      <data key="d8">8</data>
    </edge>
    <edge source="164" target="341">
      <data key="d8">445</data>
    </edge>
    <edge source="164" target="215">
      <data key="d8">17</data>
    </edge>
    <edge source="164" target="216">
      <data key="d8">619</data>
    </edge>
    <edge source="164" target="217">
      <data key="d8">117</data>
    </edge>
    <edge source="164" target="219">
      <data key="d8">52</data>
    </edge>
    <edge source="164" target="224">
      <data key="d8">415</data>
    </edge>
    <edge source="164" target="225">
      <data key="d8">3027</data>
    </edge>
    <edge source="164" target="226">
      <data key="d8">7873</data>
    </edge>
    <edge source="164" target="227">
      <data key="d8">54</data>
    </edge>
    <edge source="164" target="232">
      <data key="d8">8</data>
    </edge>
    <edge source="164" target="233">
      <data key="d8">2277</data>
    </edge>
    <edge source="164" target="234">
      <data key="d8">497</data>
    </edge>
    <edge source="164" target="240">
      <data key="d8">5</data>
    </edge>
    <edge source="164" target="218">
      <data key="d8">4799</data>
    </edge>
    <edge source="165" target="266">
      <data key="d8">58</data>
    </edge>
    <edge source="165" target="267">
      <data key="d8">300</data>
    </edge>
    <edge source="165" target="268">
      <data key="d8">7</data>
    </edge>
    <edge source="165" target="273">
      <data key="d8">35</data>
    </edge>
    <edge source="165" target="274">
      <data key="d8">1561</data>
    </edge>
    <edge source="165" target="275">
      <data key="d8">2</data>
    </edge>
    <edge source="165" target="280">
      <data key="d8">118</data>
    </edge>
    <edge source="165" target="281">
      <data key="d8">641</data>
    </edge>
    <edge source="165" target="282">
      <data key="d8">1139</data>
    </edge>
    <edge source="165" target="283">
      <data key="d8">905</data>
    </edge>
    <edge source="165" target="288">
      <data key="d8">223</data>
    </edge>
    <edge source="165" target="166">
      <data key="d8">3560</data>
    </edge>
    <edge source="165" target="171">
      <data key="d8">358</data>
    </edge>
    <edge source="165" target="172">
      <data key="d8">4651</data>
    </edge>
    <edge source="165" target="309">
      <data key="d8">124</data>
    </edge>
    <edge source="165" target="310">
      <data key="d8">179</data>
    </edge>
    <edge source="165" target="315">
      <data key="d8">567</data>
    </edge>
    <edge source="165" target="316">
      <data key="d8">961</data>
    </edge>
    <edge source="165" target="317">
      <data key="d8">23</data>
    </edge>
    <edge source="165" target="322">
      <data key="d8">49</data>
    </edge>
    <edge source="165" target="323">
      <data key="d8">186</data>
    </edge>
    <edge source="165" target="324">
      <data key="d8">9</data>
    </edge>
    <edge source="165" target="210">
      <data key="d8">46</data>
    </edge>
    <edge source="165" target="211">
      <data key="d8">1</data>
    </edge>
    <edge source="165" target="341">
      <data key="d8">474</data>
    </edge>
    <edge source="165" target="218">
      <data key="d8">2829</data>
    </edge>
    <edge source="165" target="219">
      <data key="d8">4</data>
    </edge>
    <edge source="165" target="225">
      <data key="d8">1644</data>
    </edge>
    <edge source="165" target="226">
      <data key="d8">6276</data>
    </edge>
    <edge source="165" target="227">
      <data key="d8">5143</data>
    </edge>
    <edge source="165" target="228">
      <data key="d8">1413</data>
    </edge>
    <edge source="165" target="233">
      <data key="d8">528</data>
    </edge>
    <edge source="165" target="234">
      <data key="d8">64</data>
    </edge>
    <edge source="165" target="240">
      <data key="d8">1</data>
    </edge>
    <edge source="166" target="273">
      <data key="d8">7</data>
    </edge>
    <edge source="166" target="274">
      <data key="d8">40</data>
    </edge>
    <edge source="166" target="280">
      <data key="d8">1</data>
    </edge>
    <edge source="166" target="281">
      <data key="d8">197</data>
    </edge>
    <edge source="166" target="282">
      <data key="d8">306</data>
    </edge>
    <edge source="166" target="283">
      <data key="d8">223</data>
    </edge>
    <edge source="166" target="288">
      <data key="d8">117</data>
    </edge>
    <edge source="166" target="171">
      <data key="d8">1</data>
    </edge>
    <edge source="166" target="172">
      <data key="d8">229</data>
    </edge>
    <edge source="166" target="173">
      <data key="d8">42</data>
    </edge>
    <edge source="166" target="315">
      <data key="d8">53</data>
    </edge>
    <edge source="166" target="316">
      <data key="d8">33</data>
    </edge>
    <edge source="166" target="322">
      <data key="d8">14</data>
    </edge>
    <edge source="166" target="323">
      <data key="d8">104</data>
    </edge>
    <edge source="166" target="341">
      <data key="d8">33</data>
    </edge>
    <edge source="166" target="218">
      <data key="d8">19</data>
    </edge>
    <edge source="166" target="220">
      <data key="d8">2</data>
    </edge>
    <edge source="166" target="226">
      <data key="d8">454</data>
    </edge>
    <edge source="166" target="227">
      <data key="d8">1179</data>
    </edge>
    <edge source="166" target="228">
      <data key="d8">296</data>
    </edge>
    <edge source="166" target="233">
      <data key="d8">139</data>
    </edge>
    <edge source="167" target="224">
      <data key="d8">15</data>
    </edge>
    <edge source="167" target="223">
      <data key="d8">150</data>
    </edge>
    <edge source="167" target="229">
      <data key="d8">19</data>
    </edge>
    <edge source="167" target="230">
      <data key="d8">465</data>
    </edge>
    <edge source="167" target="321">
      <data key="d8">92</data>
    </edge>
    <edge source="167" target="168">
      <data key="d8">1122</data>
    </edge>
    <edge source="167" target="236">
      <data key="d8">1</data>
    </edge>
    <edge source="167" target="237">
      <data key="d8">12</data>
    </edge>
    <edge source="167" target="174">
      <data key="d8">31</data>
    </edge>
    <edge source="167" target="175">
      <data key="d8">7</data>
    </edge>
    <edge source="167" target="272">
      <data key="d8">2</data>
    </edge>
    <edge source="167" target="278">
      <data key="d8">164</data>
    </edge>
    <edge source="167" target="279">
      <data key="d8">164</data>
    </edge>
    <edge source="167" target="314">
      <data key="d8">2</data>
    </edge>
    <edge source="167" target="285">
      <data key="d8">132</data>
    </edge>
    <edge source="167" target="231">
      <data key="d8">40</data>
    </edge>
    <edge source="168" target="264">
      <data key="d8">10</data>
    </edge>
    <edge source="168" target="265">
      <data key="d8">11</data>
    </edge>
    <edge source="168" target="271">
      <data key="d8">167</data>
    </edge>
    <edge source="168" target="272">
      <data key="d8">962</data>
    </edge>
    <edge source="168" target="278">
      <data key="d8">793</data>
    </edge>
    <edge source="168" target="279">
      <data key="d8">1311</data>
    </edge>
    <edge source="168" target="285">
      <data key="d8">544</data>
    </edge>
    <edge source="168" target="169">
      <data key="d8">3808</data>
    </edge>
    <edge source="168" target="170">
      <data key="d8">28</data>
    </edge>
    <edge source="168" target="175">
      <data key="d8">2619</data>
    </edge>
    <edge source="168" target="176">
      <data key="d8">977</data>
    </edge>
    <edge source="168" target="308">
      <data key="d8">11</data>
    </edge>
    <edge source="168" target="313">
      <data key="d8">41</data>
    </edge>
    <edge source="168" target="314">
      <data key="d8">977</data>
    </edge>
    <edge source="168" target="315">
      <data key="d8">28</data>
    </edge>
    <edge source="168" target="321">
      <data key="d8">692</data>
    </edge>
    <edge source="168" target="224">
      <data key="d8">3573</data>
    </edge>
    <edge source="168" target="207">
      <data key="d8">12</data>
    </edge>
    <edge source="168" target="340">
      <data key="d8">10</data>
    </edge>
    <edge source="168" target="215">
      <data key="d8">703</data>
    </edge>
    <edge source="168" target="216">
      <data key="d8">344</data>
    </edge>
    <edge source="168" target="222">
      <data key="d8">35</data>
    </edge>
    <edge source="168" target="223">
      <data key="d8">5105</data>
    </edge>
    <edge source="168" target="230">
      <data key="d8">3904</data>
    </edge>
    <edge source="168" target="231">
      <data key="d8">2286</data>
    </edge>
    <edge source="168" target="237">
      <data key="d8">363</data>
    </edge>
    <edge source="168" target="238">
      <data key="d8">281</data>
    </edge>
    <edge source="169" target="278">
      <data key="d8">10</data>
    </edge>
    <edge source="169" target="279">
      <data key="d8">10</data>
    </edge>
    <edge source="169" target="285">
      <data key="d8">5</data>
    </edge>
    <edge source="169" target="170">
      <data key="d8">504</data>
    </edge>
    <edge source="169" target="175">
      <data key="d8">1477</data>
    </edge>
    <edge source="169" target="176">
      <data key="d8">2298</data>
    </edge>
    <edge source="169" target="177">
      <data key="d8">53</data>
    </edge>
    <edge source="169" target="321">
      <data key="d8">8</data>
    </edge>
    <edge source="169" target="223">
      <data key="d8">350</data>
    </edge>
    <edge source="169" target="224">
      <data key="d8">502</data>
    </edge>
    <edge source="169" target="230">
      <data key="d8">556</data>
    </edge>
    <edge source="169" target="231">
      <data key="d8">1196</data>
    </edge>
    <edge source="169" target="237">
      <data key="d8">316</data>
    </edge>
    <edge source="169" target="238">
      <data key="d8">588</data>
    </edge>
    <edge source="169" target="232">
      <data key="d8">15</data>
    </edge>
    <edge source="170" target="171">
      <data key="d8">926</data>
    </edge>
    <edge source="170" target="175">
      <data key="d8">4</data>
    </edge>
    <edge source="170" target="176">
      <data key="d8">195</data>
    </edge>
    <edge source="170" target="177">
      <data key="d8">275</data>
    </edge>
    <edge source="170" target="178">
      <data key="d8">716</data>
    </edge>
    <edge source="170" target="225">
      <data key="d8">14</data>
    </edge>
    <edge source="170" target="232">
      <data key="d8">376</data>
    </edge>
    <edge source="170" target="233">
      <data key="d8">184</data>
    </edge>
    <edge source="170" target="237">
      <data key="d8">34</data>
    </edge>
    <edge source="170" target="238">
      <data key="d8">83</data>
    </edge>
    <edge source="170" target="239">
      <data key="d8">1</data>
    </edge>
    <edge source="170" target="240">
      <data key="d8">145</data>
    </edge>
    <edge source="171" target="273">
      <data key="d8">2</data>
    </edge>
    <edge source="171" target="274">
      <data key="d8">88</data>
    </edge>
    <edge source="171" target="280">
      <data key="d8">28</data>
    </edge>
    <edge source="171" target="281">
      <data key="d8">182</data>
    </edge>
    <edge source="171" target="282">
      <data key="d8">2</data>
    </edge>
    <edge source="171" target="283">
      <data key="d8">2</data>
    </edge>
    <edge source="171" target="288">
      <data key="d8">60</data>
    </edge>
    <edge source="171" target="172">
      <data key="d8">4408</data>
    </edge>
    <edge source="171" target="177">
      <data key="d8">110</data>
    </edge>
    <edge source="171" target="178">
      <data key="d8">3378</data>
    </edge>
    <edge source="171" target="179">
      <data key="d8">394</data>
    </edge>
    <edge source="171" target="315">
      <data key="d8">142</data>
    </edge>
    <edge source="171" target="316">
      <data key="d8">85</data>
    </edge>
    <edge source="171" target="322">
      <data key="d8">60</data>
    </edge>
    <edge source="171" target="323">
      <data key="d8">67</data>
    </edge>
    <edge source="171" target="341">
      <data key="d8">85</data>
    </edge>
    <edge source="171" target="225">
      <data key="d8">550</data>
    </edge>
    <edge source="171" target="226">
      <data key="d8">2814</data>
    </edge>
    <edge source="171" target="227">
      <data key="d8">69</data>
    </edge>
    <edge source="171" target="228">
      <data key="d8">8</data>
    </edge>
    <edge source="171" target="232">
      <data key="d8">278</data>
    </edge>
    <edge source="171" target="233">
      <data key="d8">5509</data>
    </edge>
    <edge source="171" target="239">
      <data key="d8">164</data>
    </edge>
    <edge source="171" target="240">
      <data key="d8">663</data>
    </edge>
    <edge source="171" target="234">
      <data key="d8">684</data>
    </edge>
    <edge source="172" target="235">
      <data key="d8">1</data>
    </edge>
    <edge source="172" target="273">
      <data key="d8">32</data>
    </edge>
    <edge source="172" target="274">
      <data key="d8">540</data>
    </edge>
    <edge source="172" target="280">
      <data key="d8">63</data>
    </edge>
    <edge source="172" target="281">
      <data key="d8">520</data>
    </edge>
    <edge source="172" target="282">
      <data key="d8">230</data>
    </edge>
    <edge source="172" target="283">
      <data key="d8">226</data>
    </edge>
    <edge source="172" target="288">
      <data key="d8">229</data>
    </edge>
    <edge source="172" target="173">
      <data key="d8">101</data>
    </edge>
    <edge source="172" target="178">
      <data key="d8">934</data>
    </edge>
    <edge source="172" target="179">
      <data key="d8">632</data>
    </edge>
    <edge source="172" target="315">
      <data key="d8">490</data>
    </edge>
    <edge source="172" target="316">
      <data key="d8">450</data>
    </edge>
    <edge source="172" target="322">
      <data key="d8">140</data>
    </edge>
    <edge source="172" target="323">
      <data key="d8">182</data>
    </edge>
    <edge source="172" target="341">
      <data key="d8">321</data>
    </edge>
    <edge source="172" target="218">
      <data key="d8">892</data>
    </edge>
    <edge source="172" target="225">
      <data key="d8">1579</data>
    </edge>
    <edge source="172" target="226">
      <data key="d8">4794</data>
    </edge>
    <edge source="172" target="227">
      <data key="d8">940</data>
    </edge>
    <edge source="172" target="228">
      <data key="d8">100</data>
    </edge>
    <edge source="172" target="233">
      <data key="d8">2149</data>
    </edge>
    <edge source="172" target="234">
      <data key="d8">1205</data>
    </edge>
    <edge source="172" target="240">
      <data key="d8">451</data>
    </edge>
    <edge source="172" target="241">
      <data key="d8">7</data>
    </edge>
    <edge source="173" target="179">
      <data key="d8">1</data>
    </edge>
    <edge source="173" target="235">
      <data key="d8">3</data>
    </edge>
    <edge source="174" target="236">
      <data key="d8">18</data>
    </edge>
    <edge source="174" target="237">
      <data key="d8">7</data>
    </edge>
    <edge source="174" target="175">
      <data key="d8">39</data>
    </edge>
    <edge source="175" target="272">
      <data key="d8">366</data>
    </edge>
    <edge source="175" target="278">
      <data key="d8">46</data>
    </edge>
    <edge source="175" target="279">
      <data key="d8">869</data>
    </edge>
    <edge source="175" target="285">
      <data key="d8">21</data>
    </edge>
    <edge source="175" target="286">
      <data key="d8">38</data>
    </edge>
    <edge source="175" target="176">
      <data key="d8">2748</data>
    </edge>
    <edge source="175" target="180">
      <data key="d8">13</data>
    </edge>
    <edge source="175" target="181">
      <data key="d8">11</data>
    </edge>
    <edge source="175" target="314">
      <data key="d8">470</data>
    </edge>
    <edge source="175" target="315">
      <data key="d8">38</data>
    </edge>
    <edge source="175" target="321">
      <data key="d8">471</data>
    </edge>
    <edge source="175" target="340">
      <data key="d8">14</data>
    </edge>
    <edge source="175" target="223">
      <data key="d8">1534</data>
    </edge>
    <edge source="175" target="224">
      <data key="d8">1551</data>
    </edge>
    <edge source="175" target="230">
      <data key="d8">1961</data>
    </edge>
    <edge source="175" target="231">
      <data key="d8">2348</data>
    </edge>
    <edge source="175" target="237">
      <data key="d8">975</data>
    </edge>
    <edge source="175" target="238">
      <data key="d8">932</data>
    </edge>
    <edge source="175" target="232">
      <data key="d8">1</data>
    </edge>
    <edge source="176" target="286">
      <data key="d8">40</data>
    </edge>
    <edge source="176" target="287">
      <data key="d8">60</data>
    </edge>
    <edge source="176" target="293">
      <data key="d8">42</data>
    </edge>
    <edge source="176" target="177">
      <data key="d8">751</data>
    </edge>
    <edge source="176" target="180">
      <data key="d8">40</data>
    </edge>
    <edge source="176" target="181">
      <data key="d8">599</data>
    </edge>
    <edge source="176" target="230">
      <data key="d8">119</data>
    </edge>
    <edge source="176" target="231">
      <data key="d8">670</data>
    </edge>
    <edge source="176" target="237">
      <data key="d8">794</data>
    </edge>
    <edge source="176" target="238">
      <data key="d8">3010</data>
    </edge>
    <edge source="176" target="239">
      <data key="d8">77</data>
    </edge>
    <edge source="176" target="232">
      <data key="d8">71</data>
    </edge>
    <edge source="177" target="286">
      <data key="d8">1</data>
    </edge>
    <edge source="177" target="292">
      <data key="d8">5</data>
    </edge>
    <edge source="177" target="293">
      <data key="d8">375</data>
    </edge>
    <edge source="177" target="294">
      <data key="d8">26</data>
    </edge>
    <edge source="177" target="178">
      <data key="d8">1715</data>
    </edge>
    <edge source="177" target="182">
      <data key="d8">330</data>
    </edge>
    <edge source="177" target="183">
      <data key="d8">10</data>
    </edge>
    <edge source="177" target="231">
      <data key="d8">1</data>
    </edge>
    <edge source="177" target="232">
      <data key="d8">192</data>
    </edge>
    <edge source="177" target="233">
      <data key="d8">169</data>
    </edge>
    <edge source="177" target="237">
      <data key="d8">9</data>
    </edge>
    <edge source="177" target="238">
      <data key="d8">212</data>
    </edge>
    <edge source="177" target="239">
      <data key="d8">1719</data>
    </edge>
    <edge source="177" target="240">
      <data key="d8">562</data>
    </edge>
    <edge source="177" target="244">
      <data key="d8">10</data>
    </edge>
    <edge source="177" target="245">
      <data key="d8">19</data>
    </edge>
    <edge source="178" target="288">
      <data key="d8">1</data>
    </edge>
    <edge source="178" target="294">
      <data key="d8">52</data>
    </edge>
    <edge source="178" target="179">
      <data key="d8">1377</data>
    </edge>
    <edge source="178" target="182">
      <data key="d8">1</data>
    </edge>
    <edge source="178" target="183">
      <data key="d8">335</data>
    </edge>
    <edge source="178" target="226">
      <data key="d8">36</data>
    </edge>
    <edge source="178" target="232">
      <data key="d8">515</data>
    </edge>
    <edge source="178" target="233">
      <data key="d8">1471</data>
    </edge>
    <edge source="178" target="239">
      <data key="d8">299</data>
    </edge>
    <edge source="178" target="240">
      <data key="d8">2986</data>
    </edge>
    <edge source="178" target="241">
      <data key="d8">79</data>
    </edge>
    <edge source="178" target="245">
      <data key="d8">58</data>
    </edge>
    <edge source="178" target="234">
      <data key="d8">133</data>
    </edge>
    <edge source="179" target="232">
      <data key="d8">11</data>
    </edge>
    <edge source="179" target="233">
      <data key="d8">343</data>
    </edge>
    <edge source="179" target="234">
      <data key="d8">37</data>
    </edge>
    <edge source="179" target="240">
      <data key="d8">341</data>
    </edge>
    <edge source="179" target="241">
      <data key="d8">63</data>
    </edge>
    <edge source="179" target="183">
      <data key="d8">1</data>
    </edge>
    <edge source="180" target="181">
      <data key="d8">19</data>
    </edge>
    <edge source="181" target="237">
      <data key="d8">7</data>
    </edge>
    <edge source="181" target="238">
      <data key="d8">142</data>
    </edge>
    <edge source="181" target="243">
      <data key="d8">31</data>
    </edge>
    <edge source="182" target="239">
      <data key="d8">52</data>
    </edge>
    <edge source="182" target="244">
      <data key="d8">25</data>
    </edge>
    <edge source="182" target="183">
      <data key="d8">1</data>
    </edge>
    <edge source="183" target="240">
      <data key="d8">81</data>
    </edge>
    <edge source="183" target="245">
      <data key="d8">29</data>
    </edge>
    <edge source="184" target="188">
      <data key="d8">59</data>
    </edge>
    <edge source="185" target="190">
      <data key="d8">6</data>
    </edge>
    <edge source="185" target="189">
      <data key="d8">21</data>
    </edge>
    <edge source="186" target="190">
      <data key="d8">1</data>
    </edge>
    <edge source="187" target="193">
      <data key="d8">111</data>
    </edge>
    <edge source="187" target="188">
      <data key="d8">34</data>
    </edge>
    <edge source="188" target="258">
      <data key="d8">48</data>
    </edge>
    <edge source="188" target="302">
      <data key="d8">32</data>
    </edge>
    <edge source="188" target="189">
      <data key="d8">402</data>
    </edge>
    <edge source="188" target="192">
      <data key="d8">51</data>
    </edge>
    <edge source="188" target="193">
      <data key="d8">179</data>
    </edge>
    <edge source="188" target="194">
      <data key="d8">2170</data>
    </edge>
    <edge source="188" target="195">
      <data key="d8">208</data>
    </edge>
    <edge source="188" target="199">
      <data key="d8">101</data>
    </edge>
    <edge source="188" target="200">
      <data key="d8">321</data>
    </edge>
    <edge source="188" target="201">
      <data key="d8">342</data>
    </edge>
    <edge source="188" target="253">
      <data key="d8">1</data>
    </edge>
    <edge source="188" target="247">
      <data key="d8">75</data>
    </edge>
    <edge source="188" target="252">
      <data key="d8">233</data>
    </edge>
    <edge source="189" target="194">
      <data key="d8">59</data>
    </edge>
    <edge source="189" target="253">
      <data key="d8">228</data>
    </edge>
    <edge source="189" target="195">
      <data key="d8">935</data>
    </edge>
    <edge source="189" target="190">
      <data key="d8">491</data>
    </edge>
    <edge source="189" target="248">
      <data key="d8">109</data>
    </edge>
    <edge source="189" target="196">
      <data key="d8">52</data>
    </edge>
    <edge source="189" target="254">
      <data key="d8">7</data>
    </edge>
    <edge source="190" target="191">
      <data key="d8">13</data>
    </edge>
    <edge source="190" target="195">
      <data key="d8">1402</data>
    </edge>
    <edge source="190" target="202">
      <data key="d8">10</data>
    </edge>
    <edge source="190" target="203">
      <data key="d8">770</data>
    </edge>
    <edge source="190" target="204">
      <data key="d8">896</data>
    </edge>
    <edge source="190" target="254">
      <data key="d8">5</data>
    </edge>
    <edge source="190" target="248">
      <data key="d8">5</data>
    </edge>
    <edge source="190" target="196">
      <data key="d8">1567</data>
    </edge>
    <edge source="190" target="249">
      <data key="d8">7</data>
    </edge>
    <edge source="190" target="253">
      <data key="d8">19</data>
    </edge>
    <edge source="190" target="197">
      <data key="d8">269</data>
    </edge>
    <edge source="191" target="197">
      <data key="d8">4</data>
    </edge>
    <edge source="192" target="194">
      <data key="d8">929</data>
    </edge>
    <edge source="192" target="193">
      <data key="d8">2000</data>
    </edge>
    <edge source="192" target="200">
      <data key="d8">900</data>
    </edge>
    <edge source="192" target="201">
      <data key="d8">274</data>
    </edge>
    <edge source="192" target="199">
      <data key="d8">382</data>
    </edge>
    <edge source="192" target="257">
      <data key="d8">10</data>
    </edge>
    <edge source="192" target="302">
      <data key="d8">1</data>
    </edge>
    <edge source="192" target="258">
      <data key="d8">56</data>
    </edge>
    <edge source="192" target="252">
      <data key="d8">48</data>
    </edge>
    <edge source="192" target="250">
      <data key="d8">17</data>
    </edge>
    <edge source="192" target="251">
      <data key="d8">83</data>
    </edge>
    <edge source="193" target="256">
      <data key="d8">56</data>
    </edge>
    <edge source="193" target="258">
      <data key="d8">74</data>
    </edge>
    <edge source="193" target="257">
      <data key="d8">297</data>
    </edge>
    <edge source="193" target="302">
      <data key="d8">1</data>
    </edge>
    <edge source="193" target="194">
      <data key="d8">2999</data>
    </edge>
    <edge source="193" target="199">
      <data key="d8">943</data>
    </edge>
    <edge source="193" target="200">
      <data key="d8">2475</data>
    </edge>
    <edge source="193" target="201">
      <data key="d8">639</data>
    </edge>
    <edge source="193" target="250">
      <data key="d8">93</data>
    </edge>
    <edge source="193" target="251">
      <data key="d8">655</data>
    </edge>
    <edge source="193" target="252">
      <data key="d8">77</data>
    </edge>
    <edge source="194" target="257">
      <data key="d8">458</data>
    </edge>
    <edge source="194" target="258">
      <data key="d8">2549</data>
    </edge>
    <edge source="194" target="259">
      <data key="d8">53</data>
    </edge>
    <edge source="194" target="264">
      <data key="d8">2</data>
    </edge>
    <edge source="194" target="265">
      <data key="d8">22</data>
    </edge>
    <edge source="194" target="260">
      <data key="d8">52</data>
    </edge>
    <edge source="194" target="297">
      <data key="d8">151</data>
    </edge>
    <edge source="194" target="298">
      <data key="d8">83</data>
    </edge>
    <edge source="194" target="301">
      <data key="d8">1</data>
    </edge>
    <edge source="194" target="302">
      <data key="d8">688</data>
    </edge>
    <edge source="194" target="303">
      <data key="d8">79</data>
    </edge>
    <edge source="194" target="308">
      <data key="d8">37</data>
    </edge>
    <edge source="194" target="309">
      <data key="d8">7</data>
    </edge>
    <edge source="194" target="195">
      <data key="d8">481</data>
    </edge>
    <edge source="194" target="199">
      <data key="d8">1364</data>
    </edge>
    <edge source="194" target="200">
      <data key="d8">3732</data>
    </edge>
    <edge source="194" target="201">
      <data key="d8">6304</data>
    </edge>
    <edge source="194" target="202">
      <data key="d8">359</data>
    </edge>
    <edge source="194" target="203">
      <data key="d8">129</data>
    </edge>
    <edge source="194" target="207">
      <data key="d8">39</data>
    </edge>
    <edge source="194" target="208">
      <data key="d8">337</data>
    </edge>
    <edge source="194" target="209">
      <data key="d8">86</data>
    </edge>
    <edge source="194" target="210">
      <data key="d8">3</data>
    </edge>
    <edge source="194" target="216">
      <data key="d8">4</data>
    </edge>
    <edge source="194" target="253">
      <data key="d8">121</data>
    </edge>
    <edge source="194" target="247">
      <data key="d8">2</data>
    </edge>
    <edge source="194" target="251">
      <data key="d8">893</data>
    </edge>
    <edge source="194" target="252">
      <data key="d8">3959</data>
    </edge>
    <edge source="195" target="259">
      <data key="d8">1104</data>
    </edge>
    <edge source="195" target="260">
      <data key="d8">8</data>
    </edge>
    <edge source="195" target="298">
      <data key="d8">13</data>
    </edge>
    <edge source="195" target="196">
      <data key="d8">4873</data>
    </edge>
    <edge source="195" target="197">
      <data key="d8">378</data>
    </edge>
    <edge source="195" target="200">
      <data key="d8">50</data>
    </edge>
    <edge source="195" target="201">
      <data key="d8">28</data>
    </edge>
    <edge source="195" target="202">
      <data key="d8">2494</data>
    </edge>
    <edge source="195" target="203">
      <data key="d8">4294</data>
    </edge>
    <edge source="195" target="204">
      <data key="d8">3576</data>
    </edge>
    <edge source="195" target="207">
      <data key="d8">33</data>
    </edge>
    <edge source="195" target="208">
      <data key="d8">49</data>
    </edge>
    <edge source="195" target="209">
      <data key="d8">62</data>
    </edge>
    <edge source="195" target="210">
      <data key="d8">329</data>
    </edge>
    <edge source="195" target="218">
      <data key="d8">26</data>
    </edge>
    <edge source="195" target="254">
      <data key="d8">10</data>
    </edge>
    <edge source="195" target="248">
      <data key="d8">41</data>
    </edge>
    <edge source="195" target="252">
      <data key="d8">1</data>
    </edge>
    <edge source="195" target="253">
      <data key="d8">2273</data>
    </edge>
    <edge source="196" target="259">
      <data key="d8">1012</data>
    </edge>
    <edge source="196" target="261">
      <data key="d8">39</data>
    </edge>
    <edge source="196" target="260">
      <data key="d8">732</data>
    </edge>
    <edge source="196" target="298">
      <data key="d8">7</data>
    </edge>
    <edge source="196" target="303">
      <data key="d8">5</data>
    </edge>
    <edge source="196" target="197">
      <data key="d8">2640</data>
    </edge>
    <edge source="196" target="200">
      <data key="d8">147</data>
    </edge>
    <edge source="196" target="201">
      <data key="d8">121</data>
    </edge>
    <edge source="196" target="202">
      <data key="d8">1129</data>
    </edge>
    <edge source="196" target="203">
      <data key="d8">5599</data>
    </edge>
    <edge source="196" target="204">
      <data key="d8">5048</data>
    </edge>
    <edge source="196" target="207">
      <data key="d8">46</data>
    </edge>
    <edge source="196" target="208">
      <data key="d8">147</data>
    </edge>
    <edge source="196" target="209">
      <data key="d8">162</data>
    </edge>
    <edge source="196" target="210">
      <data key="d8">524</data>
    </edge>
    <edge source="196" target="211">
      <data key="d8">2</data>
    </edge>
    <edge source="196" target="212">
      <data key="d8">2</data>
    </edge>
    <edge source="196" target="218">
      <data key="d8">68</data>
    </edge>
    <edge source="196" target="248">
      <data key="d8">6</data>
    </edge>
    <edge source="196" target="253">
      <data key="d8">1523</data>
    </edge>
    <edge source="196" target="254">
      <data key="d8">915</data>
    </edge>
    <edge source="196" target="255">
      <data key="d8">26</data>
    </edge>
    <edge source="197" target="259">
      <data key="d8">225</data>
    </edge>
    <edge source="197" target="204">
      <data key="d8">1150</data>
    </edge>
    <edge source="197" target="202">
      <data key="d8">247</data>
    </edge>
    <edge source="197" target="203">
      <data key="d8">224</data>
    </edge>
    <edge source="197" target="255">
      <data key="d8">81</data>
    </edge>
    <edge source="197" target="253">
      <data key="d8">295</data>
    </edge>
    <edge source="197" target="261">
      <data key="d8">15</data>
    </edge>
    <edge source="199" target="256">
      <data key="d8">156</data>
    </edge>
    <edge source="199" target="257">
      <data key="d8">57</data>
    </edge>
    <edge source="199" target="258">
      <data key="d8">341</data>
    </edge>
    <edge source="199" target="302">
      <data key="d8">287</data>
    </edge>
    <edge source="199" target="264">
      <data key="d8">1</data>
    </edge>
    <edge source="199" target="307">
      <data key="d8">1</data>
    </edge>
    <edge source="199" target="200">
      <data key="d8">3348</data>
    </edge>
    <edge source="199" target="201">
      <data key="d8">2180</data>
    </edge>
    <edge source="199" target="206">
      <data key="d8">661</data>
    </edge>
    <edge source="199" target="250">
      <data key="d8">7</data>
    </edge>
    <edge source="199" target="251">
      <data key="d8">113</data>
    </edge>
    <edge source="200" target="256">
      <data key="d8">462</data>
    </edge>
    <edge source="200" target="263">
      <data key="d8">14</data>
    </edge>
    <edge source="200" target="266">
      <data key="d8">4</data>
    </edge>
    <edge source="200" target="267">
      <data key="d8">4</data>
    </edge>
    <edge source="200" target="259">
      <data key="d8">53</data>
    </edge>
    <edge source="200" target="260">
      <data key="d8">53</data>
    </edge>
    <edge source="200" target="257">
      <data key="d8">2810</data>
    </edge>
    <edge source="200" target="301">
      <data key="d8">94</data>
    </edge>
    <edge source="200" target="302">
      <data key="d8">3351</data>
    </edge>
    <edge source="200" target="303">
      <data key="d8">323</data>
    </edge>
    <edge source="200" target="264">
      <data key="d8">586</data>
    </edge>
    <edge source="200" target="307">
      <data key="d8">219</data>
    </edge>
    <edge source="200" target="308">
      <data key="d8">1541</data>
    </edge>
    <edge source="200" target="309">
      <data key="d8">201</data>
    </edge>
    <edge source="200" target="265">
      <data key="d8">1587</data>
    </edge>
    <edge source="200" target="201">
      <data key="d8">11916</data>
    </edge>
    <edge source="200" target="202">
      <data key="d8">985</data>
    </edge>
    <edge source="200" target="203">
      <data key="d8">1071</data>
    </edge>
    <edge source="200" target="204">
      <data key="d8">77</data>
    </edge>
    <edge source="200" target="206">
      <data key="d8">521</data>
    </edge>
    <edge source="200" target="207">
      <data key="d8">3144</data>
    </edge>
    <edge source="200" target="208">
      <data key="d8">2437</data>
    </edge>
    <edge source="200" target="209">
      <data key="d8">1435</data>
    </edge>
    <edge source="200" target="210">
      <data key="d8">1295</data>
    </edge>
    <edge source="200" target="211">
      <data key="d8">14</data>
    </edge>
    <edge source="200" target="212">
      <data key="d8">2</data>
    </edge>
    <edge source="200" target="336">
      <data key="d8">1</data>
    </edge>
    <edge source="200" target="258">
      <data key="d8">5375</data>
    </edge>
    <edge source="200" target="250">
      <data key="d8">68</data>
    </edge>
    <edge source="200" target="251">
      <data key="d8">298</data>
    </edge>
    <edge source="200" target="252">
      <data key="d8">42</data>
    </edge>
    <edge source="201" target="258">
      <data key="d8">9009</data>
    </edge>
    <edge source="201" target="259">
      <data key="d8">847</data>
    </edge>
    <edge source="201" target="263">
      <data key="d8">2</data>
    </edge>
    <edge source="201" target="264">
      <data key="d8">407</data>
    </edge>
    <edge source="201" target="260">
      <data key="d8">421</data>
    </edge>
    <edge source="201" target="257">
      <data key="d8">1355</data>
    </edge>
    <edge source="201" target="301">
      <data key="d8">94</data>
    </edge>
    <edge source="201" target="302">
      <data key="d8">4492</data>
    </edge>
    <edge source="201" target="303">
      <data key="d8">1109</data>
    </edge>
    <edge source="201" target="307">
      <data key="d8">244</data>
    </edge>
    <edge source="201" target="308">
      <data key="d8">2157</data>
    </edge>
    <edge source="201" target="309">
      <data key="d8">690</data>
    </edge>
    <edge source="201" target="265">
      <data key="d8">2462</data>
    </edge>
    <edge source="201" target="266">
      <data key="d8">562</data>
    </edge>
    <edge source="201" target="267">
      <data key="d8">805</data>
    </edge>
    <edge source="201" target="202">
      <data key="d8">5941</data>
    </edge>
    <edge source="201" target="203">
      <data key="d8">2828</data>
    </edge>
    <edge source="201" target="204">
      <data key="d8">80</data>
    </edge>
    <edge source="201" target="206">
      <data key="d8">144</data>
    </edge>
    <edge source="201" target="207">
      <data key="d8">1678</data>
    </edge>
    <edge source="201" target="208">
      <data key="d8">4486</data>
    </edge>
    <edge source="201" target="209">
      <data key="d8">3196</data>
    </edge>
    <edge source="201" target="210">
      <data key="d8">2103</data>
    </edge>
    <edge source="201" target="211">
      <data key="d8">15</data>
    </edge>
    <edge source="201" target="212">
      <data key="d8">2</data>
    </edge>
    <edge source="201" target="216">
      <data key="d8">91</data>
    </edge>
    <edge source="201" target="252">
      <data key="d8">289</data>
    </edge>
    <edge source="202" target="258">
      <data key="d8">540</data>
    </edge>
    <edge source="202" target="265">
      <data key="d8">952</data>
    </edge>
    <edge source="202" target="259">
      <data key="d8">4532</data>
    </edge>
    <edge source="202" target="260">
      <data key="d8">1741</data>
    </edge>
    <edge source="202" target="298">
      <data key="d8">4</data>
    </edge>
    <edge source="202" target="302">
      <data key="d8">267</data>
    </edge>
    <edge source="202" target="303">
      <data key="d8">1195</data>
    </edge>
    <edge source="202" target="308">
      <data key="d8">1027</data>
    </edge>
    <edge source="202" target="309">
      <data key="d8">508</data>
    </edge>
    <edge source="202" target="266">
      <data key="d8">1269</data>
    </edge>
    <edge source="202" target="267">
      <data key="d8">887</data>
    </edge>
    <edge source="202" target="203">
      <data key="d8">6691</data>
    </edge>
    <edge source="202" target="204">
      <data key="d8">2665</data>
    </edge>
    <edge source="202" target="208">
      <data key="d8">1110</data>
    </edge>
    <edge source="202" target="209">
      <data key="d8">2292</data>
    </edge>
    <edge source="202" target="210">
      <data key="d8">1255</data>
    </edge>
    <edge source="202" target="211">
      <data key="d8">25</data>
    </edge>
    <edge source="202" target="212">
      <data key="d8">7</data>
    </edge>
    <edge source="202" target="253">
      <data key="d8">620</data>
    </edge>
    <edge source="203" target="258">
      <data key="d8">287</data>
    </edge>
    <edge source="203" target="259">
      <data key="d8">6634</data>
    </edge>
    <edge source="203" target="265">
      <data key="d8">341</data>
    </edge>
    <edge source="203" target="266">
      <data key="d8">865</data>
    </edge>
    <edge source="203" target="260">
      <data key="d8">10228</data>
    </edge>
    <edge source="203" target="261">
      <data key="d8">827</data>
    </edge>
    <edge source="203" target="302">
      <data key="d8">111</data>
    </edge>
    <edge source="203" target="303">
      <data key="d8">3530</data>
    </edge>
    <edge source="203" target="304">
      <data key="d8">2023</data>
    </edge>
    <edge source="203" target="305">
      <data key="d8">38</data>
    </edge>
    <edge source="203" target="308">
      <data key="d8">377</data>
    </edge>
    <edge source="203" target="309">
      <data key="d8">295</data>
    </edge>
    <edge source="203" target="310">
      <data key="d8">140</data>
    </edge>
    <edge source="203" target="267">
      <data key="d8">1122</data>
    </edge>
    <edge source="203" target="204">
      <data key="d8">14509</data>
    </edge>
    <edge source="203" target="206">
      <data key="d8">88</data>
    </edge>
    <edge source="203" target="207">
      <data key="d8">796</data>
    </edge>
    <edge source="203" target="208">
      <data key="d8">1504</data>
    </edge>
    <edge source="203" target="209">
      <data key="d8">2006</data>
    </edge>
    <edge source="203" target="210">
      <data key="d8">5426</data>
    </edge>
    <edge source="203" target="211">
      <data key="d8">4028</data>
    </edge>
    <edge source="203" target="212">
      <data key="d8">624</data>
    </edge>
    <edge source="203" target="218">
      <data key="d8">123</data>
    </edge>
    <edge source="203" target="253">
      <data key="d8">342</data>
    </edge>
    <edge source="204" target="259">
      <data key="d8">4309</data>
    </edge>
    <edge source="204" target="261">
      <data key="d8">1031</data>
    </edge>
    <edge source="204" target="265">
      <data key="d8">4</data>
    </edge>
    <edge source="204" target="267">
      <data key="d8">60</data>
    </edge>
    <edge source="204" target="260">
      <data key="d8">5887</data>
    </edge>
    <edge source="204" target="303">
      <data key="d8">2028</data>
    </edge>
    <edge source="204" target="304">
      <data key="d8">1325</data>
    </edge>
    <edge source="204" target="305">
      <data key="d8">38</data>
    </edge>
    <edge source="204" target="308">
      <data key="d8">4</data>
    </edge>
    <edge source="204" target="309">
      <data key="d8">4</data>
    </edge>
    <edge source="204" target="266">
      <data key="d8">230</data>
    </edge>
    <edge source="204" target="205">
      <data key="d8">193</data>
    </edge>
    <edge source="204" target="208">
      <data key="d8">85</data>
    </edge>
    <edge source="204" target="209">
      <data key="d8">268</data>
    </edge>
    <edge source="204" target="210">
      <data key="d8">418</data>
    </edge>
    <edge source="204" target="211">
      <data key="d8">2596</data>
    </edge>
    <edge source="204" target="212">
      <data key="d8">872</data>
    </edge>
    <edge source="204" target="268">
      <data key="d8">46</data>
    </edge>
    <edge source="204" target="253">
      <data key="d8">548</data>
    </edge>
    <edge source="205" target="212">
      <data key="d8">81</data>
    </edge>
    <edge source="206" target="257">
      <data key="d8">267</data>
    </edge>
    <edge source="206" target="258">
      <data key="d8">412</data>
    </edge>
    <edge source="206" target="263">
      <data key="d8">191</data>
    </edge>
    <edge source="206" target="264">
      <data key="d8">610</data>
    </edge>
    <edge source="206" target="265">
      <data key="d8">4394</data>
    </edge>
    <edge source="206" target="267">
      <data key="d8">99</data>
    </edge>
    <edge source="206" target="270">
      <data key="d8">2</data>
    </edge>
    <edge source="206" target="307">
      <data key="d8">443</data>
    </edge>
    <edge source="206" target="308">
      <data key="d8">3547</data>
    </edge>
    <edge source="206" target="309">
      <data key="d8">770</data>
    </edge>
    <edge source="206" target="266">
      <data key="d8">33</data>
    </edge>
    <edge source="206" target="207">
      <data key="d8">7413</data>
    </edge>
    <edge source="206" target="208">
      <data key="d8">5219</data>
    </edge>
    <edge source="206" target="209">
      <data key="d8">356</data>
    </edge>
    <edge source="206" target="210">
      <data key="d8">356</data>
    </edge>
    <edge source="206" target="214">
      <data key="d8">542</data>
    </edge>
    <edge source="206" target="215">
      <data key="d8">448</data>
    </edge>
    <edge source="206" target="336">
      <data key="d8">47</data>
    </edge>
    <edge source="207" target="257">
      <data key="d8">797</data>
    </edge>
    <edge source="207" target="258">
      <data key="d8">1088</data>
    </edge>
    <edge source="207" target="263">
      <data key="d8">809</data>
    </edge>
    <edge source="207" target="264">
      <data key="d8">4444</data>
    </edge>
    <edge source="207" target="265">
      <data key="d8">11911</data>
    </edge>
    <edge source="207" target="267">
      <data key="d8">2111</data>
    </edge>
    <edge source="207" target="271">
      <data key="d8">106</data>
    </edge>
    <edge source="207" target="272">
      <data key="d8">11</data>
    </edge>
    <edge source="207" target="274">
      <data key="d8">15</data>
    </edge>
    <edge source="207" target="277">
      <data key="d8">10</data>
    </edge>
    <edge source="207" target="278">
      <data key="d8">30</data>
    </edge>
    <edge source="207" target="218">
      <data key="d8">170</data>
    </edge>
    <edge source="207" target="301">
      <data key="d8">1</data>
    </edge>
    <edge source="207" target="302">
      <data key="d8">241</data>
    </edge>
    <edge source="207" target="303">
      <data key="d8">3</data>
    </edge>
    <edge source="207" target="307">
      <data key="d8">543</data>
    </edge>
    <edge source="207" target="308">
      <data key="d8">8761</data>
    </edge>
    <edge source="207" target="309">
      <data key="d8">1631</data>
    </edge>
    <edge source="207" target="310">
      <data key="d8">15</data>
    </edge>
    <edge source="207" target="313">
      <data key="d8">5</data>
    </edge>
    <edge source="207" target="314">
      <data key="d8">6</data>
    </edge>
    <edge source="207" target="266">
      <data key="d8">864</data>
    </edge>
    <edge source="207" target="319">
      <data key="d8">8</data>
    </edge>
    <edge source="207" target="336">
      <data key="d8">70</data>
    </edge>
    <edge source="207" target="209">
      <data key="d8">3807</data>
    </edge>
    <edge source="207" target="214">
      <data key="d8">128</data>
    </edge>
    <edge source="207" target="215">
      <data key="d8">7116</data>
    </edge>
    <edge source="207" target="216">
      <data key="d8">1236</data>
    </edge>
    <edge source="207" target="219">
      <data key="d8">35</data>
    </edge>
    <edge source="207" target="223">
      <data key="d8">707</data>
    </edge>
    <edge source="207" target="208">
      <data key="d8">12747</data>
    </edge>
    <edge source="207" target="210">
      <data key="d8">3014</data>
    </edge>
    <edge source="207" target="211">
      <data key="d8">1</data>
    </edge>
    <edge source="207" target="252">
      <data key="d8">1</data>
    </edge>
    <edge source="208" target="257">
      <data key="d8">497</data>
    </edge>
    <edge source="208" target="258">
      <data key="d8">911</data>
    </edge>
    <edge source="208" target="259">
      <data key="d8">479</data>
    </edge>
    <edge source="208" target="264">
      <data key="d8">828</data>
    </edge>
    <edge source="208" target="265">
      <data key="d8">18058</data>
    </edge>
    <edge source="208" target="266">
      <data key="d8">9490</data>
    </edge>
    <edge source="208" target="267">
      <data key="d8">12300</data>
    </edge>
    <edge source="208" target="272">
      <data key="d8">328</data>
    </edge>
    <edge source="208" target="273">
      <data key="d8">142</data>
    </edge>
    <edge source="208" target="274">
      <data key="d8">94</data>
    </edge>
    <edge source="208" target="280">
      <data key="d8">13</data>
    </edge>
    <edge source="208" target="218">
      <data key="d8">638</data>
    </edge>
    <edge source="208" target="219">
      <data key="d8">6</data>
    </edge>
    <edge source="208" target="210">
      <data key="d8">9430</data>
    </edge>
    <edge source="208" target="302">
      <data key="d8">156</data>
    </edge>
    <edge source="208" target="303">
      <data key="d8">286</data>
    </edge>
    <edge source="208" target="307">
      <data key="d8">473</data>
    </edge>
    <edge source="208" target="308">
      <data key="d8">10913</data>
    </edge>
    <edge source="208" target="309">
      <data key="d8">9693</data>
    </edge>
    <edge source="208" target="314">
      <data key="d8">34</data>
    </edge>
    <edge source="208" target="315">
      <data key="d8">64</data>
    </edge>
    <edge source="208" target="336">
      <data key="d8">54</data>
    </edge>
    <edge source="208" target="209">
      <data key="d8">17825</data>
    </edge>
    <edge source="208" target="211">
      <data key="d8">53</data>
    </edge>
    <edge source="208" target="212">
      <data key="d8">2</data>
    </edge>
    <edge source="208" target="215">
      <data key="d8">1267</data>
    </edge>
    <edge source="208" target="216">
      <data key="d8">5718</data>
    </edge>
    <edge source="208" target="217">
      <data key="d8">636</data>
    </edge>
    <edge source="208" target="223">
      <data key="d8">170</data>
    </edge>
    <edge source="209" target="258">
      <data key="d8">96</data>
    </edge>
    <edge source="209" target="265">
      <data key="d8">10903</data>
    </edge>
    <edge source="209" target="266">
      <data key="d8">10450</data>
    </edge>
    <edge source="209" target="272">
      <data key="d8">768</data>
    </edge>
    <edge source="209" target="274">
      <data key="d8">65</data>
    </edge>
    <edge source="209" target="280">
      <data key="d8">13</data>
    </edge>
    <edge source="209" target="260">
      <data key="d8">208</data>
    </edge>
    <edge source="209" target="218">
      <data key="d8">1819</data>
    </edge>
    <edge source="209" target="210">
      <data key="d8">11162</data>
    </edge>
    <edge source="209" target="303">
      <data key="d8">361</data>
    </edge>
    <edge source="209" target="308">
      <data key="d8">5105</data>
    </edge>
    <edge source="209" target="309">
      <data key="d8">8926</data>
    </edge>
    <edge source="209" target="314">
      <data key="d8">4</data>
    </edge>
    <edge source="209" target="315">
      <data key="d8">34</data>
    </edge>
    <edge source="209" target="267">
      <data key="d8">13472</data>
    </edge>
    <edge source="209" target="212">
      <data key="d8">8</data>
    </edge>
    <edge source="209" target="215">
      <data key="d8">18</data>
    </edge>
    <edge source="209" target="216">
      <data key="d8">4467</data>
    </edge>
    <edge source="209" target="217">
      <data key="d8">2555</data>
    </edge>
    <edge source="209" target="273">
      <data key="d8">78</data>
    </edge>
    <edge source="209" target="259">
      <data key="d8">1003</data>
    </edge>
    <edge source="209" target="211">
      <data key="d8">75</data>
    </edge>
    <edge source="210" target="258">
      <data key="d8">70</data>
    </edge>
    <edge source="210" target="260">
      <data key="d8">2008</data>
    </edge>
    <edge source="210" target="264">
      <data key="d8">2</data>
    </edge>
    <edge source="210" target="266">
      <data key="d8">15137</data>
    </edge>
    <edge source="210" target="272">
      <data key="d8">639</data>
    </edge>
    <edge source="210" target="274">
      <data key="d8">403</data>
    </edge>
    <edge source="210" target="275">
      <data key="d8">263</data>
    </edge>
    <edge source="210" target="276">
      <data key="d8">40</data>
    </edge>
    <edge source="210" target="281">
      <data key="d8">916</data>
    </edge>
    <edge source="210" target="282">
      <data key="d8">523</data>
    </edge>
    <edge source="210" target="283">
      <data key="d8">72</data>
    </edge>
    <edge source="210" target="303">
      <data key="d8">938</data>
    </edge>
    <edge source="210" target="304">
      <data key="d8">549</data>
    </edge>
    <edge source="210" target="308">
      <data key="d8">1485</data>
    </edge>
    <edge source="210" target="309">
      <data key="d8">14804</data>
    </edge>
    <edge source="210" target="310">
      <data key="d8">716</data>
    </edge>
    <edge source="210" target="311">
      <data key="d8">84</data>
    </edge>
    <edge source="210" target="267">
      <data key="d8">20883</data>
    </edge>
    <edge source="210" target="316">
      <data key="d8">2</data>
    </edge>
    <edge source="210" target="265">
      <data key="d8">4366</data>
    </edge>
    <edge source="210" target="324">
      <data key="d8">246</data>
    </edge>
    <edge source="210" target="268">
      <data key="d8">496</data>
    </edge>
    <edge source="210" target="211">
      <data key="d8">7831</data>
    </edge>
    <edge source="210" target="212">
      <data key="d8">48</data>
    </edge>
    <edge source="210" target="215">
      <data key="d8">129</data>
    </edge>
    <edge source="210" target="216">
      <data key="d8">2370</data>
    </edge>
    <edge source="210" target="217">
      <data key="d8">900</data>
    </edge>
    <edge source="210" target="218">
      <data key="d8">9081</data>
    </edge>
    <edge source="210" target="219">
      <data key="d8">3128</data>
    </edge>
    <edge source="210" target="220">
      <data key="d8">82</data>
    </edge>
    <edge source="210" target="223">
      <data key="d8">8</data>
    </edge>
    <edge source="210" target="323">
      <data key="d8">67</data>
    </edge>
    <edge source="210" target="226">
      <data key="d8">868</data>
    </edge>
    <edge source="210" target="227">
      <data key="d8">7</data>
    </edge>
    <edge source="210" target="273">
      <data key="d8">2</data>
    </edge>
    <edge source="210" target="259">
      <data key="d8">1061</data>
    </edge>
    <edge source="211" target="259">
      <data key="d8">1787</data>
    </edge>
    <edge source="211" target="260">
      <data key="d8">2859</data>
    </edge>
    <edge source="211" target="265">
      <data key="d8">32</data>
    </edge>
    <edge source="211" target="266">
      <data key="d8">2846</data>
    </edge>
    <edge source="211" target="267">
      <data key="d8">3471</data>
    </edge>
    <edge source="211" target="274">
      <data key="d8">9</data>
    </edge>
    <edge source="211" target="275">
      <data key="d8">47</data>
    </edge>
    <edge source="211" target="281">
      <data key="d8">38</data>
    </edge>
    <edge source="211" target="282">
      <data key="d8">4</data>
    </edge>
    <edge source="211" target="219">
      <data key="d8">2618</data>
    </edge>
    <edge source="211" target="303">
      <data key="d8">1556</data>
    </edge>
    <edge source="211" target="304">
      <data key="d8">565</data>
    </edge>
    <edge source="211" target="308">
      <data key="d8">32</data>
    </edge>
    <edge source="211" target="309">
      <data key="d8">2840</data>
    </edge>
    <edge source="211" target="310">
      <data key="d8">161</data>
    </edge>
    <edge source="211" target="323">
      <data key="d8">12</data>
    </edge>
    <edge source="211" target="324">
      <data key="d8">10</data>
    </edge>
    <edge source="211" target="212">
      <data key="d8">1864</data>
    </edge>
    <edge source="211" target="215">
      <data key="d8">1</data>
    </edge>
    <edge source="211" target="216">
      <data key="d8">1</data>
    </edge>
    <edge source="211" target="218">
      <data key="d8">939</data>
    </edge>
    <edge source="211" target="220">
      <data key="d8">399</data>
    </edge>
    <edge source="211" target="226">
      <data key="d8">47</data>
    </edge>
    <edge source="211" target="269">
      <data key="d8">99</data>
    </edge>
    <edge source="211" target="276">
      <data key="d8">37</data>
    </edge>
    <edge source="211" target="268">
      <data key="d8">809</data>
    </edge>
    <edge source="212" target="259">
      <data key="d8">458</data>
    </edge>
    <edge source="212" target="260">
      <data key="d8">459</data>
    </edge>
    <edge source="212" target="266">
      <data key="d8">47</data>
    </edge>
    <edge source="212" target="267">
      <data key="d8">50</data>
    </edge>
    <edge source="212" target="269">
      <data key="d8">75</data>
    </edge>
    <edge source="212" target="276">
      <data key="d8">6</data>
    </edge>
    <edge source="212" target="303">
      <data key="d8">337</data>
    </edge>
    <edge source="212" target="309">
      <data key="d8">41</data>
    </edge>
    <edge source="212" target="219">
      <data key="d8">85</data>
    </edge>
    <edge source="212" target="220">
      <data key="d8">229</data>
    </edge>
    <edge source="212" target="268">
      <data key="d8">1</data>
    </edge>
    <edge source="214" target="223">
      <data key="d8">264</data>
    </edge>
    <edge source="214" target="263">
      <data key="d8">98</data>
    </edge>
    <edge source="214" target="264">
      <data key="d8">14</data>
    </edge>
    <edge source="214" target="265">
      <data key="d8">15</data>
    </edge>
    <edge source="214" target="215">
      <data key="d8">1273</data>
    </edge>
    <edge source="214" target="271">
      <data key="d8">517</data>
    </edge>
    <edge source="214" target="272">
      <data key="d8">12</data>
    </edge>
    <edge source="214" target="222">
      <data key="d8">303</data>
    </edge>
    <edge source="214" target="340">
      <data key="d8">7</data>
    </edge>
    <edge source="214" target="270">
      <data key="d8">978</data>
    </edge>
    <edge source="214" target="278">
      <data key="d8">545</data>
    </edge>
    <edge source="214" target="279">
      <data key="d8">14</data>
    </edge>
    <edge source="214" target="308">
      <data key="d8">15</data>
    </edge>
    <edge source="214" target="314">
      <data key="d8">12</data>
    </edge>
    <edge source="214" target="277">
      <data key="d8">263</data>
    </edge>
    <edge source="215" target="263">
      <data key="d8">283</data>
    </edge>
    <edge source="215" target="264">
      <data key="d8">4735</data>
    </edge>
    <edge source="215" target="265">
      <data key="d8">5458</data>
    </edge>
    <edge source="215" target="267">
      <data key="d8">85</data>
    </edge>
    <edge source="215" target="270">
      <data key="d8">1581</data>
    </edge>
    <edge source="215" target="271">
      <data key="d8">6688</data>
    </edge>
    <edge source="215" target="272">
      <data key="d8">4589</data>
    </edge>
    <edge source="215" target="277">
      <data key="d8">1369</data>
    </edge>
    <edge source="215" target="278">
      <data key="d8">2792</data>
    </edge>
    <edge source="215" target="279">
      <data key="d8">682</data>
    </edge>
    <edge source="215" target="218">
      <data key="d8">321</data>
    </edge>
    <edge source="215" target="307">
      <data key="d8">330</data>
    </edge>
    <edge source="215" target="308">
      <data key="d8">4638</data>
    </edge>
    <edge source="215" target="309">
      <data key="d8">83</data>
    </edge>
    <edge source="215" target="310">
      <data key="d8">15</data>
    </edge>
    <edge source="215" target="313">
      <data key="d8">1233</data>
    </edge>
    <edge source="215" target="314">
      <data key="d8">2531</data>
    </edge>
    <edge source="215" target="315">
      <data key="d8">31</data>
    </edge>
    <edge source="215" target="316">
      <data key="d8">31</data>
    </edge>
    <edge source="215" target="266">
      <data key="d8">68</data>
    </edge>
    <edge source="215" target="319">
      <data key="d8">65</data>
    </edge>
    <edge source="215" target="224">
      <data key="d8">694</data>
    </edge>
    <edge source="215" target="225">
      <data key="d8">437</data>
    </edge>
    <edge source="215" target="219">
      <data key="d8">28</data>
    </edge>
    <edge source="215" target="340">
      <data key="d8">312</data>
    </edge>
    <edge source="215" target="341">
      <data key="d8">31</data>
    </edge>
    <edge source="215" target="216">
      <data key="d8">4793</data>
    </edge>
    <edge source="215" target="217">
      <data key="d8">165</data>
    </edge>
    <edge source="215" target="222">
      <data key="d8">132</data>
    </edge>
    <edge source="215" target="223">
      <data key="d8">8258</data>
    </edge>
    <edge source="215" target="226">
      <data key="d8">54</data>
    </edge>
    <edge source="215" target="274">
      <data key="d8">55</data>
    </edge>
    <edge source="216" target="263">
      <data key="d8">369</data>
    </edge>
    <edge source="216" target="264">
      <data key="d8">2631</data>
    </edge>
    <edge source="216" target="265">
      <data key="d8">11035</data>
    </edge>
    <edge source="216" target="266">
      <data key="d8">5400</data>
    </edge>
    <edge source="216" target="267">
      <data key="d8">6883</data>
    </edge>
    <edge source="216" target="271">
      <data key="d8">2195</data>
    </edge>
    <edge source="216" target="272">
      <data key="d8">15978</data>
    </edge>
    <edge source="216" target="273">
      <data key="d8">5078</data>
    </edge>
    <edge source="216" target="278">
      <data key="d8">2</data>
    </edge>
    <edge source="216" target="279">
      <data key="d8">244</data>
    </edge>
    <edge source="216" target="285">
      <data key="d8">2</data>
    </edge>
    <edge source="216" target="307">
      <data key="d8">286</data>
    </edge>
    <edge source="216" target="308">
      <data key="d8">5484</data>
    </edge>
    <edge source="216" target="309">
      <data key="d8">6316</data>
    </edge>
    <edge source="216" target="310">
      <data key="d8">85</data>
    </edge>
    <edge source="216" target="313">
      <data key="d8">1659</data>
    </edge>
    <edge source="216" target="314">
      <data key="d8">7483</data>
    </edge>
    <edge source="216" target="315">
      <data key="d8">5345</data>
    </edge>
    <edge source="216" target="316">
      <data key="d8">626</data>
    </edge>
    <edge source="216" target="341">
      <data key="d8">1063</data>
    </edge>
    <edge source="216" target="217">
      <data key="d8">12332</data>
    </edge>
    <edge source="216" target="219">
      <data key="d8">19</data>
    </edge>
    <edge source="216" target="280">
      <data key="d8">76</data>
    </edge>
    <edge source="216" target="223">
      <data key="d8">2265</data>
    </edge>
    <edge source="216" target="224">
      <data key="d8">3506</data>
    </edge>
    <edge source="216" target="225">
      <data key="d8">3503</data>
    </edge>
    <edge source="216" target="226">
      <data key="d8">302</data>
    </edge>
    <edge source="216" target="230">
      <data key="d8">21</data>
    </edge>
    <edge source="216" target="274">
      <data key="d8">5904</data>
    </edge>
    <edge source="216" target="218">
      <data key="d8">5313</data>
    </edge>
    <edge source="217" target="265">
      <data key="d8">1610</data>
    </edge>
    <edge source="217" target="266">
      <data key="d8">3133</data>
    </edge>
    <edge source="217" target="267">
      <data key="d8">4099</data>
    </edge>
    <edge source="217" target="272">
      <data key="d8">7244</data>
    </edge>
    <edge source="217" target="273">
      <data key="d8">5931</data>
    </edge>
    <edge source="217" target="281">
      <data key="d8">10</data>
    </edge>
    <edge source="217" target="280">
      <data key="d8">236</data>
    </edge>
    <edge source="217" target="308">
      <data key="d8">1506</data>
    </edge>
    <edge source="217" target="309">
      <data key="d8">4117</data>
    </edge>
    <edge source="217" target="310">
      <data key="d8">77</data>
    </edge>
    <edge source="217" target="314">
      <data key="d8">4058</data>
    </edge>
    <edge source="217" target="315">
      <data key="d8">5709</data>
    </edge>
    <edge source="217" target="316">
      <data key="d8">920</data>
    </edge>
    <edge source="217" target="279">
      <data key="d8">83</data>
    </edge>
    <edge source="217" target="341">
      <data key="d8">1491</data>
    </edge>
    <edge source="217" target="218">
      <data key="d8">5390</data>
    </edge>
    <edge source="217" target="223">
      <data key="d8">129</data>
    </edge>
    <edge source="217" target="224">
      <data key="d8">1550</data>
    </edge>
    <edge source="217" target="225">
      <data key="d8">2714</data>
    </edge>
    <edge source="217" target="226">
      <data key="d8">88</data>
    </edge>
    <edge source="217" target="274">
      <data key="d8">6862</data>
    </edge>
    <edge source="218" target="264">
      <data key="d8">2</data>
    </edge>
    <edge source="218" target="265">
      <data key="d8">488</data>
    </edge>
    <edge source="218" target="266">
      <data key="d8">7607</data>
    </edge>
    <edge source="218" target="267">
      <data key="d8">15305</data>
    </edge>
    <edge source="218" target="272">
      <data key="d8">2079</data>
    </edge>
    <edge source="218" target="274">
      <data key="d8">16721</data>
    </edge>
    <edge source="218" target="275">
      <data key="d8">1062</data>
    </edge>
    <edge source="218" target="281">
      <data key="d8">2372</data>
    </edge>
    <edge source="218" target="280">
      <data key="d8">97</data>
    </edge>
    <edge source="218" target="283">
      <data key="d8">200</data>
    </edge>
    <edge source="218" target="282">
      <data key="d8">1634</data>
    </edge>
    <edge source="218" target="324">
      <data key="d8">378</data>
    </edge>
    <edge source="218" target="220">
      <data key="d8">71</data>
    </edge>
    <edge source="218" target="308">
      <data key="d8">20</data>
    </edge>
    <edge source="218" target="309">
      <data key="d8">11448</data>
    </edge>
    <edge source="218" target="310">
      <data key="d8">4309</data>
    </edge>
    <edge source="218" target="313">
      <data key="d8">8</data>
    </edge>
    <edge source="218" target="314">
      <data key="d8">439</data>
    </edge>
    <edge source="218" target="315">
      <data key="d8">3289</data>
    </edge>
    <edge source="218" target="316">
      <data key="d8">5409</data>
    </edge>
    <edge source="218" target="317">
      <data key="d8">135</data>
    </edge>
    <edge source="218" target="323">
      <data key="d8">135</data>
    </edge>
    <edge source="218" target="268">
      <data key="d8">34</data>
    </edge>
    <edge source="218" target="341">
      <data key="d8">1380</data>
    </edge>
    <edge source="218" target="219">
      <data key="d8">3097</data>
    </edge>
    <edge source="218" target="223">
      <data key="d8">147</data>
    </edge>
    <edge source="218" target="224">
      <data key="d8">1055</data>
    </edge>
    <edge source="218" target="225">
      <data key="d8">1820</data>
    </edge>
    <edge source="218" target="226">
      <data key="d8">8173</data>
    </edge>
    <edge source="218" target="227">
      <data key="d8">22</data>
    </edge>
    <edge source="218" target="273">
      <data key="d8">1048</data>
    </edge>
    <edge source="218" target="276">
      <data key="d8">234</data>
    </edge>
    <edge source="219" target="266">
      <data key="d8">1301</data>
    </edge>
    <edge source="219" target="267">
      <data key="d8">1301</data>
    </edge>
    <edge source="219" target="268">
      <data key="d8">9</data>
    </edge>
    <edge source="219" target="275">
      <data key="d8">1733</data>
    </edge>
    <edge source="219" target="281">
      <data key="d8">1527</data>
    </edge>
    <edge source="219" target="282">
      <data key="d8">1096</data>
    </edge>
    <edge source="219" target="283">
      <data key="d8">158</data>
    </edge>
    <edge source="219" target="220">
      <data key="d8">1160</data>
    </edge>
    <edge source="219" target="274">
      <data key="d8">210</data>
    </edge>
    <edge source="219" target="309">
      <data key="d8">1301</data>
    </edge>
    <edge source="219" target="323">
      <data key="d8">74</data>
    </edge>
    <edge source="219" target="324">
      <data key="d8">296</data>
    </edge>
    <edge source="219" target="223">
      <data key="d8">2</data>
    </edge>
    <edge source="219" target="226">
      <data key="d8">1310</data>
    </edge>
    <edge source="219" target="227">
      <data key="d8">770</data>
    </edge>
    <edge source="219" target="228">
      <data key="d8">125</data>
    </edge>
    <edge source="219" target="276">
      <data key="d8">908</data>
    </edge>
    <edge source="220" target="266">
      <data key="d8">57</data>
    </edge>
    <edge source="220" target="267">
      <data key="d8">57</data>
    </edge>
    <edge source="220" target="269">
      <data key="d8">3</data>
    </edge>
    <edge source="220" target="275">
      <data key="d8">509</data>
    </edge>
    <edge source="220" target="281">
      <data key="d8">52</data>
    </edge>
    <edge source="220" target="282">
      <data key="d8">45</data>
    </edge>
    <edge source="220" target="283">
      <data key="d8">21</data>
    </edge>
    <edge source="220" target="309">
      <data key="d8">57</data>
    </edge>
    <edge source="220" target="324">
      <data key="d8">6</data>
    </edge>
    <edge source="220" target="226">
      <data key="d8">52</data>
    </edge>
    <edge source="220" target="227">
      <data key="d8">2</data>
    </edge>
    <edge source="220" target="228">
      <data key="d8">84</data>
    </edge>
    <edge source="220" target="276">
      <data key="d8">366</data>
    </edge>
    <edge source="222" target="229">
      <data key="d8">196</data>
    </edge>
    <edge source="222" target="230">
      <data key="d8">212</data>
    </edge>
    <edge source="222" target="279">
      <data key="d8">600</data>
    </edge>
    <edge source="222" target="224">
      <data key="d8">1</data>
    </edge>
    <edge source="222" target="271">
      <data key="d8">29</data>
    </edge>
    <edge source="222" target="272">
      <data key="d8">278</data>
    </edge>
    <edge source="222" target="340">
      <data key="d8">1</data>
    </edge>
    <edge source="222" target="277">
      <data key="d8">1187</data>
    </edge>
    <edge source="222" target="278">
      <data key="d8">1389</data>
    </edge>
    <edge source="222" target="313">
      <data key="d8">17</data>
    </edge>
    <edge source="222" target="314">
      <data key="d8">10</data>
    </edge>
    <edge source="222" target="223">
      <data key="d8">4050</data>
    </edge>
    <edge source="222" target="285">
      <data key="d8">19</data>
    </edge>
    <edge source="223" target="263">
      <data key="d8">50</data>
    </edge>
    <edge source="223" target="264">
      <data key="d8">1179</data>
    </edge>
    <edge source="223" target="265">
      <data key="d8">968</data>
    </edge>
    <edge source="223" target="266">
      <data key="d8">6</data>
    </edge>
    <edge source="223" target="267">
      <data key="d8">8</data>
    </edge>
    <edge source="223" target="270">
      <data key="d8">669</data>
    </edge>
    <edge source="223" target="271">
      <data key="d8">2805</data>
    </edge>
    <edge source="223" target="272">
      <data key="d8">7603</data>
    </edge>
    <edge source="223" target="274">
      <data key="d8">32</data>
    </edge>
    <edge source="223" target="277">
      <data key="d8">2329</data>
    </edge>
    <edge source="223" target="278">
      <data key="d8">8800</data>
    </edge>
    <edge source="223" target="279">
      <data key="d8">8489</data>
    </edge>
    <edge source="223" target="285">
      <data key="d8">1217</data>
    </edge>
    <edge source="223" target="237">
      <data key="d8">787</data>
    </edge>
    <edge source="223" target="307">
      <data key="d8">178</data>
    </edge>
    <edge source="223" target="308">
      <data key="d8">903</data>
    </edge>
    <edge source="223" target="309">
      <data key="d8">6</data>
    </edge>
    <edge source="223" target="313">
      <data key="d8">1211</data>
    </edge>
    <edge source="223" target="314">
      <data key="d8">5981</data>
    </edge>
    <edge source="223" target="315">
      <data key="d8">105</data>
    </edge>
    <edge source="223" target="316">
      <data key="d8">26</data>
    </edge>
    <edge source="223" target="319">
      <data key="d8">31</data>
    </edge>
    <edge source="223" target="320">
      <data key="d8">50</data>
    </edge>
    <edge source="223" target="321">
      <data key="d8">2452</data>
    </edge>
    <edge source="223" target="340">
      <data key="d8">1058</data>
    </edge>
    <edge source="223" target="341">
      <data key="d8">26</data>
    </edge>
    <edge source="223" target="224">
      <data key="d8">9380</data>
    </edge>
    <edge source="223" target="225">
      <data key="d8">567</data>
    </edge>
    <edge source="223" target="226">
      <data key="d8">40</data>
    </edge>
    <edge source="223" target="230">
      <data key="d8">5867</data>
    </edge>
    <edge source="223" target="231">
      <data key="d8">2588</data>
    </edge>
    <edge source="224" target="263">
      <data key="d8">9</data>
    </edge>
    <edge source="224" target="264">
      <data key="d8">113</data>
    </edge>
    <edge source="224" target="265">
      <data key="d8">45</data>
    </edge>
    <edge source="224" target="267">
      <data key="d8">35</data>
    </edge>
    <edge source="224" target="271">
      <data key="d8">129</data>
    </edge>
    <edge source="224" target="272">
      <data key="d8">4913</data>
    </edge>
    <edge source="224" target="273">
      <data key="d8">16</data>
    </edge>
    <edge source="224" target="274">
      <data key="d8">95</data>
    </edge>
    <edge source="224" target="278">
      <data key="d8">1095</data>
    </edge>
    <edge source="224" target="279">
      <data key="d8">6360</data>
    </edge>
    <edge source="224" target="285">
      <data key="d8">816</data>
    </edge>
    <edge source="224" target="286">
      <data key="d8">145</data>
    </edge>
    <edge source="224" target="307">
      <data key="d8">41</data>
    </edge>
    <edge source="224" target="308">
      <data key="d8">17</data>
    </edge>
    <edge source="224" target="309">
      <data key="d8">10</data>
    </edge>
    <edge source="224" target="310">
      <data key="d8">9</data>
    </edge>
    <edge source="224" target="313">
      <data key="d8">95</data>
    </edge>
    <edge source="224" target="314">
      <data key="d8">4833</data>
    </edge>
    <edge source="224" target="315">
      <data key="d8">394</data>
    </edge>
    <edge source="224" target="316">
      <data key="d8">75</data>
    </edge>
    <edge source="224" target="321">
      <data key="d8">1800</data>
    </edge>
    <edge source="224" target="340">
      <data key="d8">988</data>
    </edge>
    <edge source="224" target="341">
      <data key="d8">52</data>
    </edge>
    <edge source="224" target="280">
      <data key="d8">209</data>
    </edge>
    <edge source="224" target="225">
      <data key="d8">4775</data>
    </edge>
    <edge source="224" target="226">
      <data key="d8">586</data>
    </edge>
    <edge source="224" target="230">
      <data key="d8">3239</data>
    </edge>
    <edge source="224" target="231">
      <data key="d8">3008</data>
    </edge>
    <edge source="224" target="232">
      <data key="d8">6</data>
    </edge>
    <edge source="224" target="237">
      <data key="d8">667</data>
    </edge>
    <edge source="225" target="265">
      <data key="d8">7</data>
    </edge>
    <edge source="225" target="266">
      <data key="d8">2</data>
    </edge>
    <edge source="225" target="267">
      <data key="d8">112</data>
    </edge>
    <edge source="225" target="272">
      <data key="d8">396</data>
    </edge>
    <edge source="225" target="273">
      <data key="d8">1027</data>
    </edge>
    <edge source="225" target="274">
      <data key="d8">3548</data>
    </edge>
    <edge source="225" target="279">
      <data key="d8">1</data>
    </edge>
    <edge source="225" target="288">
      <data key="d8">209</data>
    </edge>
    <edge source="225" target="309">
      <data key="d8">73</data>
    </edge>
    <edge source="225" target="310">
      <data key="d8">23</data>
    </edge>
    <edge source="225" target="313">
      <data key="d8">8</data>
    </edge>
    <edge source="225" target="314">
      <data key="d8">116</data>
    </edge>
    <edge source="225" target="315">
      <data key="d8">3584</data>
    </edge>
    <edge source="225" target="316">
      <data key="d8">2284</data>
    </edge>
    <edge source="225" target="322">
      <data key="d8">445</data>
    </edge>
    <edge source="225" target="323">
      <data key="d8">534</data>
    </edge>
    <edge source="225" target="341">
      <data key="d8">1961</data>
    </edge>
    <edge source="225" target="280">
      <data key="d8">965</data>
    </edge>
    <edge source="225" target="226">
      <data key="d8">9272</data>
    </edge>
    <edge source="225" target="231">
      <data key="d8">101</data>
    </edge>
    <edge source="225" target="232">
      <data key="d8">762</data>
    </edge>
    <edge source="225" target="233">
      <data key="d8">989</data>
    </edge>
    <edge source="225" target="234">
      <data key="d8">53</data>
    </edge>
    <edge source="225" target="240">
      <data key="d8">2</data>
    </edge>
    <edge source="225" target="281">
      <data key="d8">3481</data>
    </edge>
    <edge source="226" target="266">
      <data key="d8">1426</data>
    </edge>
    <edge source="226" target="267">
      <data key="d8">2361</data>
    </edge>
    <edge source="226" target="268">
      <data key="d8">34</data>
    </edge>
    <edge source="226" target="272">
      <data key="d8">30</data>
    </edge>
    <edge source="226" target="273">
      <data key="d8">899</data>
    </edge>
    <edge source="226" target="274">
      <data key="d8">10065</data>
    </edge>
    <edge source="226" target="275">
      <data key="d8">775</data>
    </edge>
    <edge source="226" target="276">
      <data key="d8">372</data>
    </edge>
    <edge source="226" target="281">
      <data key="d8">12264</data>
    </edge>
    <edge source="226" target="280">
      <data key="d8">626</data>
    </edge>
    <edge source="226" target="283">
      <data key="d8">676</data>
    </edge>
    <edge source="226" target="282">
      <data key="d8">3211</data>
    </edge>
    <edge source="226" target="293">
      <data key="d8">1</data>
    </edge>
    <edge source="226" target="227">
      <data key="d8">5120</data>
    </edge>
    <edge source="226" target="309">
      <data key="d8">1434</data>
    </edge>
    <edge source="226" target="310">
      <data key="d8">88</data>
    </edge>
    <edge source="226" target="313">
      <data key="d8">7</data>
    </edge>
    <edge source="226" target="314">
      <data key="d8">7</data>
    </edge>
    <edge source="226" target="287">
      <data key="d8">2</data>
    </edge>
    <edge source="226" target="316">
      <data key="d8">6401</data>
    </edge>
    <edge source="226" target="317">
      <data key="d8">130</data>
    </edge>
    <edge source="226" target="288">
      <data key="d8">1827</data>
    </edge>
    <edge source="226" target="322">
      <data key="d8">1237</data>
    </edge>
    <edge source="226" target="323">
      <data key="d8">3797</data>
    </edge>
    <edge source="226" target="324">
      <data key="d8">572</data>
    </edge>
    <edge source="226" target="341">
      <data key="d8">2876</data>
    </edge>
    <edge source="226" target="315">
      <data key="d8">5839</data>
    </edge>
    <edge source="226" target="228">
      <data key="d8">679</data>
    </edge>
    <edge source="226" target="232">
      <data key="d8">71</data>
    </edge>
    <edge source="226" target="233">
      <data key="d8">6917</data>
    </edge>
    <edge source="226" target="234">
      <data key="d8">1075</data>
    </edge>
    <edge source="226" target="239">
      <data key="d8">2</data>
    </edge>
    <edge source="226" target="240">
      <data key="d8">179</data>
    </edge>
    <edge source="227" target="266">
      <data key="d8">12</data>
    </edge>
    <edge source="227" target="267">
      <data key="d8">12</data>
    </edge>
    <edge source="227" target="273">
      <data key="d8">24</data>
    </edge>
    <edge source="227" target="274">
      <data key="d8">321</data>
    </edge>
    <edge source="227" target="275">
      <data key="d8">257</data>
    </edge>
    <edge source="227" target="276">
      <data key="d8">169</data>
    </edge>
    <edge source="227" target="280">
      <data key="d8">8</data>
    </edge>
    <edge source="227" target="281">
      <data key="d8">3540</data>
    </edge>
    <edge source="227" target="282">
      <data key="d8">4663</data>
    </edge>
    <edge source="227" target="283">
      <data key="d8">1714</data>
    </edge>
    <edge source="227" target="288">
      <data key="d8">1080</data>
    </edge>
    <edge source="227" target="309">
      <data key="d8">12</data>
    </edge>
    <edge source="227" target="315">
      <data key="d8">433</data>
    </edge>
    <edge source="227" target="316">
      <data key="d8">285</data>
    </edge>
    <edge source="227" target="322">
      <data key="d8">143</data>
    </edge>
    <edge source="227" target="323">
      <data key="d8">1487</data>
    </edge>
    <edge source="227" target="324">
      <data key="d8">235</data>
    </edge>
    <edge source="227" target="341">
      <data key="d8">283</data>
    </edge>
    <edge source="227" target="228">
      <data key="d8">3195</data>
    </edge>
    <edge source="227" target="233">
      <data key="d8">1756</data>
    </edge>
    <edge source="227" target="234">
      <data key="d8">957</data>
    </edge>
    <edge source="227" target="240">
      <data key="d8">4</data>
    </edge>
    <edge source="228" target="274">
      <data key="d8">44</data>
    </edge>
    <edge source="228" target="276">
      <data key="d8">1</data>
    </edge>
    <edge source="228" target="280">
      <data key="d8">3</data>
    </edge>
    <edge source="228" target="281">
      <data key="d8">572</data>
    </edge>
    <edge source="228" target="282">
      <data key="d8">108</data>
    </edge>
    <edge source="228" target="283">
      <data key="d8">201</data>
    </edge>
    <edge source="228" target="288">
      <data key="d8">164</data>
    </edge>
    <edge source="228" target="315">
      <data key="d8">94</data>
    </edge>
    <edge source="228" target="316">
      <data key="d8">44</data>
    </edge>
    <edge source="228" target="322">
      <data key="d8">66</data>
    </edge>
    <edge source="228" target="323">
      <data key="d8">353</data>
    </edge>
    <edge source="228" target="324">
      <data key="d8">14</data>
    </edge>
    <edge source="228" target="341">
      <data key="d8">44</data>
    </edge>
    <edge source="228" target="233">
      <data key="d8">248</data>
    </edge>
    <edge source="228" target="234">
      <data key="d8">54</data>
    </edge>
    <edge source="228" target="235">
      <data key="d8">25</data>
    </edge>
    <edge source="229" target="230">
      <data key="d8">773</data>
    </edge>
    <edge source="229" target="236">
      <data key="d8">8</data>
    </edge>
    <edge source="229" target="237">
      <data key="d8">15</data>
    </edge>
    <edge source="229" target="284">
      <data key="d8">43</data>
    </edge>
    <edge source="230" target="272">
      <data key="d8">619</data>
    </edge>
    <edge source="230" target="277">
      <data key="d8">9</data>
    </edge>
    <edge source="230" target="278">
      <data key="d8">2962</data>
    </edge>
    <edge source="230" target="279">
      <data key="d8">4595</data>
    </edge>
    <edge source="230" target="284">
      <data key="d8">98</data>
    </edge>
    <edge source="230" target="285">
      <data key="d8">3910</data>
    </edge>
    <edge source="230" target="286">
      <data key="d8">1056</data>
    </edge>
    <edge source="230" target="314">
      <data key="d8">979</data>
    </edge>
    <edge source="230" target="315">
      <data key="d8">38</data>
    </edge>
    <edge source="230" target="320">
      <data key="d8">474</data>
    </edge>
    <edge source="230" target="321">
      <data key="d8">2809</data>
    </edge>
    <edge source="230" target="340">
      <data key="d8">24</data>
    </edge>
    <edge source="230" target="231">
      <data key="d8">4431</data>
    </edge>
    <edge source="230" target="237">
      <data key="d8">3161</data>
    </edge>
    <edge source="230" target="238">
      <data key="d8">508</data>
    </edge>
    <edge source="230" target="232">
      <data key="d8">9</data>
    </edge>
    <edge source="231" target="272">
      <data key="d8">513</data>
    </edge>
    <edge source="231" target="278">
      <data key="d8">89</data>
    </edge>
    <edge source="231" target="279">
      <data key="d8">1593</data>
    </edge>
    <edge source="231" target="280">
      <data key="d8">28</data>
    </edge>
    <edge source="231" target="285">
      <data key="d8">388</data>
    </edge>
    <edge source="231" target="286">
      <data key="d8">1355</data>
    </edge>
    <edge source="231" target="287">
      <data key="d8">8</data>
    </edge>
    <edge source="231" target="292">
      <data key="d8">26</data>
    </edge>
    <edge source="231" target="314">
      <data key="d8">790</data>
    </edge>
    <edge source="231" target="315">
      <data key="d8">62</data>
    </edge>
    <edge source="231" target="320">
      <data key="d8">52</data>
    </edge>
    <edge source="231" target="321">
      <data key="d8">958</data>
    </edge>
    <edge source="231" target="340">
      <data key="d8">22</data>
    </edge>
    <edge source="231" target="237">
      <data key="d8">2518</data>
    </edge>
    <edge source="231" target="238">
      <data key="d8">2353</data>
    </edge>
    <edge source="231" target="239">
      <data key="d8">8</data>
    </edge>
    <edge source="231" target="232">
      <data key="d8">1468</data>
    </edge>
    <edge source="232" target="281">
      <data key="d8">10</data>
    </edge>
    <edge source="232" target="285">
      <data key="d8">4</data>
    </edge>
    <edge source="232" target="286">
      <data key="d8">385</data>
    </edge>
    <edge source="232" target="287">
      <data key="d8">389</data>
    </edge>
    <edge source="232" target="288">
      <data key="d8">18</data>
    </edge>
    <edge source="232" target="315">
      <data key="d8">5</data>
    </edge>
    <edge source="232" target="322">
      <data key="d8">5</data>
    </edge>
    <edge source="232" target="323">
      <data key="d8">10</data>
    </edge>
    <edge source="232" target="233">
      <data key="d8">1195</data>
    </edge>
    <edge source="232" target="237">
      <data key="d8">69</data>
    </edge>
    <edge source="232" target="238">
      <data key="d8">679</data>
    </edge>
    <edge source="232" target="239">
      <data key="d8">524</data>
    </edge>
    <edge source="232" target="240">
      <data key="d8">967</data>
    </edge>
    <edge source="233" target="273">
      <data key="d8">268</data>
    </edge>
    <edge source="233" target="274">
      <data key="d8">764</data>
    </edge>
    <edge source="233" target="280">
      <data key="d8">395</data>
    </edge>
    <edge source="233" target="281">
      <data key="d8">4286</data>
    </edge>
    <edge source="233" target="282">
      <data key="d8">1596</data>
    </edge>
    <edge source="233" target="283">
      <data key="d8">15</data>
    </edge>
    <edge source="233" target="287">
      <data key="d8">187</data>
    </edge>
    <edge source="233" target="288">
      <data key="d8">3300</data>
    </edge>
    <edge source="233" target="289">
      <data key="d8">541</data>
    </edge>
    <edge source="233" target="293">
      <data key="d8">17</data>
    </edge>
    <edge source="233" target="294">
      <data key="d8">1</data>
    </edge>
    <edge source="233" target="315">
      <data key="d8">1541</data>
    </edge>
    <edge source="233" target="316">
      <data key="d8">443</data>
    </edge>
    <edge source="233" target="322">
      <data key="d8">933</data>
    </edge>
    <edge source="233" target="323">
      <data key="d8">1944</data>
    </edge>
    <edge source="233" target="324">
      <data key="d8">7</data>
    </edge>
    <edge source="233" target="341">
      <data key="d8">373</data>
    </edge>
    <edge source="233" target="234">
      <data key="d8">2868</data>
    </edge>
    <edge source="233" target="239">
      <data key="d8">224</data>
    </edge>
    <edge source="233" target="240">
      <data key="d8">3008</data>
    </edge>
    <edge source="233" target="241">
      <data key="d8">3</data>
    </edge>
    <edge source="234" target="235">
      <data key="d8">59</data>
    </edge>
    <edge source="234" target="273">
      <data key="d8">62</data>
    </edge>
    <edge source="234" target="274">
      <data key="d8">82</data>
    </edge>
    <edge source="234" target="280">
      <data key="d8">67</data>
    </edge>
    <edge source="234" target="281">
      <data key="d8">581</data>
    </edge>
    <edge source="234" target="282">
      <data key="d8">1469</data>
    </edge>
    <edge source="234" target="283">
      <data key="d8">85</data>
    </edge>
    <edge source="234" target="288">
      <data key="d8">381</data>
    </edge>
    <edge source="234" target="289">
      <data key="d8">1249</data>
    </edge>
    <edge source="234" target="295">
      <data key="d8">1</data>
    </edge>
    <edge source="234" target="315">
      <data key="d8">322</data>
    </edge>
    <edge source="234" target="316">
      <data key="d8">18</data>
    </edge>
    <edge source="234" target="322">
      <data key="d8">263</data>
    </edge>
    <edge source="234" target="323">
      <data key="d8">303</data>
    </edge>
    <edge source="234" target="324">
      <data key="d8">13</data>
    </edge>
    <edge source="234" target="341">
      <data key="d8">18</data>
    </edge>
    <edge source="234" target="240">
      <data key="d8">379</data>
    </edge>
    <edge source="234" target="241">
      <data key="d8">685</data>
    </edge>
    <edge source="235" target="289">
      <data key="d8">12</data>
    </edge>
    <edge source="235" target="290">
      <data key="d8">5</data>
    </edge>
    <edge source="236" target="237">
      <data key="d8">11</data>
    </edge>
    <edge source="237" target="272">
      <data key="d8">93</data>
    </edge>
    <edge source="237" target="278">
      <data key="d8">41</data>
    </edge>
    <edge source="237" target="279">
      <data key="d8">924</data>
    </edge>
    <edge source="237" target="285">
      <data key="d8">658</data>
    </edge>
    <edge source="237" target="286">
      <data key="d8">653</data>
    </edge>
    <edge source="237" target="291">
      <data key="d8">68</data>
    </edge>
    <edge source="237" target="292">
      <data key="d8">7</data>
    </edge>
    <edge source="237" target="293">
      <data key="d8">1</data>
    </edge>
    <edge source="237" target="314">
      <data key="d8">253</data>
    </edge>
    <edge source="237" target="320">
      <data key="d8">224</data>
    </edge>
    <edge source="237" target="321">
      <data key="d8">811</data>
    </edge>
    <edge source="237" target="340">
      <data key="d8">8</data>
    </edge>
    <edge source="237" target="238">
      <data key="d8">2040</data>
    </edge>
    <edge source="237" target="239">
      <data key="d8">1</data>
    </edge>
    <edge source="237" target="242">
      <data key="d8">1</data>
    </edge>
    <edge source="237" target="243">
      <data key="d8">6</data>
    </edge>
    <edge source="238" target="239">
      <data key="d8">841</data>
    </edge>
    <edge source="238" target="285">
      <data key="d8">120</data>
    </edge>
    <edge source="238" target="286">
      <data key="d8">690</data>
    </edge>
    <edge source="238" target="287">
      <data key="d8">121</data>
    </edge>
    <edge source="238" target="291">
      <data key="d8">21</data>
    </edge>
    <edge source="238" target="292">
      <data key="d8">1207</data>
    </edge>
    <edge source="238" target="293">
      <data key="d8">432</data>
    </edge>
    <edge source="238" target="243">
      <data key="d8">75</data>
    </edge>
    <edge source="239" target="280">
      <data key="d8">1</data>
    </edge>
    <edge source="239" target="281">
      <data key="d8">1</data>
    </edge>
    <edge source="239" target="287">
      <data key="d8">143</data>
    </edge>
    <edge source="239" target="288">
      <data key="d8">69</data>
    </edge>
    <edge source="239" target="292">
      <data key="d8">153</data>
    </edge>
    <edge source="239" target="293">
      <data key="d8">1289</data>
    </edge>
    <edge source="239" target="294">
      <data key="d8">134</data>
    </edge>
    <edge source="239" target="240">
      <data key="d8">969</data>
    </edge>
    <edge source="239" target="244">
      <data key="d8">213</data>
    </edge>
    <edge source="239" target="245">
      <data key="d8">13</data>
    </edge>
    <edge source="240" target="273">
      <data key="d8">31</data>
    </edge>
    <edge source="240" target="274">
      <data key="d8">36</data>
    </edge>
    <edge source="240" target="280">
      <data key="d8">59</data>
    </edge>
    <edge source="240" target="281">
      <data key="d8">193</data>
    </edge>
    <edge source="240" target="282">
      <data key="d8">8</data>
    </edge>
    <edge source="240" target="287">
      <data key="d8">182</data>
    </edge>
    <edge source="240" target="288">
      <data key="d8">225</data>
    </edge>
    <edge source="240" target="289">
      <data key="d8">7</data>
    </edge>
    <edge source="240" target="293">
      <data key="d8">193</data>
    </edge>
    <edge source="240" target="294">
      <data key="d8">701</data>
    </edge>
    <edge source="240" target="295">
      <data key="d8">1</data>
    </edge>
    <edge source="240" target="315">
      <data key="d8">53</data>
    </edge>
    <edge source="240" target="316">
      <data key="d8">1</data>
    </edge>
    <edge source="240" target="322">
      <data key="d8">24</data>
    </edge>
    <edge source="240" target="323">
      <data key="d8">21</data>
    </edge>
    <edge source="240" target="241">
      <data key="d8">151</data>
    </edge>
    <edge source="240" target="341">
      <data key="d8">1</data>
    </edge>
    <edge source="240" target="244">
      <data key="d8">1</data>
    </edge>
    <edge source="240" target="245">
      <data key="d8">191</data>
    </edge>
    <edge source="241" target="288">
      <data key="d8">2</data>
    </edge>
    <edge source="241" target="289">
      <data key="d8">306</data>
    </edge>
    <edge source="241" target="295">
      <data key="d8">33</data>
    </edge>
    <edge source="241" target="282">
      <data key="d8">94</data>
    </edge>
    <edge source="242" target="243">
      <data key="d8">3</data>
    </edge>
    <edge source="244" target="293">
      <data key="d8">71</data>
    </edge>
    <edge source="246" target="247">
      <data key="d8">2</data>
    </edge>
    <edge source="247" target="252">
      <data key="d8">70</data>
    </edge>
    <edge source="247" target="248">
      <data key="d8">12</data>
    </edge>
    <edge source="247" target="251">
      <data key="d8">4</data>
    </edge>
    <edge source="247" target="253">
      <data key="d8">16</data>
    </edge>
    <edge source="248" target="253">
      <data key="d8">166</data>
    </edge>
    <edge source="248" target="249">
      <data key="d8">5</data>
    </edge>
    <edge source="248" target="254">
      <data key="d8">46</data>
    </edge>
    <edge source="249" target="254">
      <data key="d8">7</data>
    </edge>
    <edge source="250" target="256">
      <data key="d8">12</data>
    </edge>
    <edge source="250" target="257">
      <data key="d8">20</data>
    </edge>
    <edge source="250" target="251">
      <data key="d8">58</data>
    </edge>
    <edge source="251" target="257">
      <data key="d8">98</data>
    </edge>
    <edge source="251" target="252">
      <data key="d8">665</data>
    </edge>
    <edge source="252" target="257">
      <data key="d8">311</data>
    </edge>
    <edge source="252" target="258">
      <data key="d8">1869</data>
    </edge>
    <edge source="252" target="259">
      <data key="d8">4</data>
    </edge>
    <edge source="252" target="264">
      <data key="d8">1</data>
    </edge>
    <edge source="252" target="297">
      <data key="d8">361</data>
    </edge>
    <edge source="252" target="298">
      <data key="d8">101</data>
    </edge>
    <edge source="252" target="301">
      <data key="d8">101</data>
    </edge>
    <edge source="252" target="302">
      <data key="d8">360</data>
    </edge>
    <edge source="252" target="303">
      <data key="d8">10</data>
    </edge>
    <edge source="252" target="253">
      <data key="d8">393</data>
    </edge>
    <edge source="253" target="259">
      <data key="d8">1164</data>
    </edge>
    <edge source="253" target="299">
      <data key="d8">1</data>
    </edge>
    <edge source="253" target="303">
      <data key="d8">96</data>
    </edge>
    <edge source="253" target="298">
      <data key="d8">418</data>
    </edge>
    <edge source="253" target="254">
      <data key="d8">288</data>
    </edge>
    <edge source="254" target="259">
      <data key="d8">209</data>
    </edge>
    <edge source="254" target="260">
      <data key="d8">757</data>
    </edge>
    <edge source="254" target="261">
      <data key="d8">101</data>
    </edge>
    <edge source="254" target="299">
      <data key="d8">17</data>
    </edge>
    <edge source="254" target="303">
      <data key="d8">86</data>
    </edge>
    <edge source="254" target="304">
      <data key="d8">67</data>
    </edge>
    <edge source="254" target="255">
      <data key="d8">114</data>
    </edge>
    <edge source="255" target="261">
      <data key="d8">11</data>
    </edge>
    <edge source="256" target="257">
      <data key="d8">392</data>
    </edge>
    <edge source="256" target="263">
      <data key="d8">118</data>
    </edge>
    <edge source="257" target="258">
      <data key="d8">2142</data>
    </edge>
    <edge source="257" target="263">
      <data key="d8">40</data>
    </edge>
    <edge source="257" target="265">
      <data key="d8">411</data>
    </edge>
    <edge source="257" target="301">
      <data key="d8">413</data>
    </edge>
    <edge source="257" target="302">
      <data key="d8">68</data>
    </edge>
    <edge source="257" target="264">
      <data key="d8">897</data>
    </edge>
    <edge source="257" target="307">
      <data key="d8">401</data>
    </edge>
    <edge source="257" target="308">
      <data key="d8">77</data>
    </edge>
    <edge source="258" target="260">
      <data key="d8">233</data>
    </edge>
    <edge source="258" target="263">
      <data key="d8">2</data>
    </edge>
    <edge source="258" target="266">
      <data key="d8">301</data>
    </edge>
    <edge source="258" target="267">
      <data key="d8">252</data>
    </edge>
    <edge source="258" target="259">
      <data key="d8">486</data>
    </edge>
    <edge source="258" target="297">
      <data key="d8">26</data>
    </edge>
    <edge source="258" target="301">
      <data key="d8">497</data>
    </edge>
    <edge source="258" target="302">
      <data key="d8">5814</data>
    </edge>
    <edge source="258" target="303">
      <data key="d8">713</data>
    </edge>
    <edge source="258" target="264">
      <data key="d8">776</data>
    </edge>
    <edge source="258" target="307">
      <data key="d8">403</data>
    </edge>
    <edge source="258" target="308">
      <data key="d8">1613</data>
    </edge>
    <edge source="258" target="309">
      <data key="d8">453</data>
    </edge>
    <edge source="258" target="265">
      <data key="d8">2488</data>
    </edge>
    <edge source="259" target="265">
      <data key="d8">747</data>
    </edge>
    <edge source="259" target="267">
      <data key="d8">1333</data>
    </edge>
    <edge source="259" target="273">
      <data key="d8">1</data>
    </edge>
    <edge source="259" target="260">
      <data key="d8">6661</data>
    </edge>
    <edge source="259" target="298">
      <data key="d8">133</data>
    </edge>
    <edge source="259" target="302">
      <data key="d8">103</data>
    </edge>
    <edge source="259" target="303">
      <data key="d8">5634</data>
    </edge>
    <edge source="259" target="304">
      <data key="d8">110</data>
    </edge>
    <edge source="259" target="308">
      <data key="d8">759</data>
    </edge>
    <edge source="259" target="309">
      <data key="d8">683</data>
    </edge>
    <edge source="259" target="310">
      <data key="d8">109</data>
    </edge>
    <edge source="259" target="266">
      <data key="d8">1813</data>
    </edge>
    <edge source="260" target="265">
      <data key="d8">198</data>
    </edge>
    <edge source="260" target="267">
      <data key="d8">1408</data>
    </edge>
    <edge source="260" target="261">
      <data key="d8">1276</data>
    </edge>
    <edge source="260" target="302">
      <data key="d8">103</data>
    </edge>
    <edge source="260" target="303">
      <data key="d8">4370</data>
    </edge>
    <edge source="260" target="304">
      <data key="d8">2357</data>
    </edge>
    <edge source="260" target="305">
      <data key="d8">48</data>
    </edge>
    <edge source="260" target="308">
      <data key="d8">233</data>
    </edge>
    <edge source="260" target="309">
      <data key="d8">227</data>
    </edge>
    <edge source="260" target="310">
      <data key="d8">519</data>
    </edge>
    <edge source="260" target="266">
      <data key="d8">802</data>
    </edge>
    <edge source="260" target="268">
      <data key="d8">55</data>
    </edge>
    <edge source="261" target="268">
      <data key="d8">136</data>
    </edge>
    <edge source="261" target="304">
      <data key="d8">113</data>
    </edge>
    <edge source="261" target="305">
      <data key="d8">38</data>
    </edge>
    <edge source="263" target="264">
      <data key="d8">2420</data>
    </edge>
    <edge source="263" target="265">
      <data key="d8">1578</data>
    </edge>
    <edge source="263" target="270">
      <data key="d8">425</data>
    </edge>
    <edge source="263" target="271">
      <data key="d8">408</data>
    </edge>
    <edge source="263" target="272">
      <data key="d8">252</data>
    </edge>
    <edge source="263" target="306">
      <data key="d8">14</data>
    </edge>
    <edge source="263" target="307">
      <data key="d8">49</data>
    </edge>
    <edge source="263" target="308">
      <data key="d8">942</data>
    </edge>
    <edge source="263" target="312">
      <data key="d8">115</data>
    </edge>
    <edge source="263" target="313">
      <data key="d8">2</data>
    </edge>
    <edge source="263" target="336">
      <data key="d8">6</data>
    </edge>
    <edge source="264" target="265">
      <data key="d8">9129</data>
    </edge>
    <edge source="264" target="266">
      <data key="d8">1</data>
    </edge>
    <edge source="264" target="267">
      <data key="d8">1</data>
    </edge>
    <edge source="264" target="270">
      <data key="d8">72</data>
    </edge>
    <edge source="264" target="271">
      <data key="d8">3414</data>
    </edge>
    <edge source="264" target="272">
      <data key="d8">998</data>
    </edge>
    <edge source="264" target="277">
      <data key="d8">43</data>
    </edge>
    <edge source="264" target="278">
      <data key="d8">134</data>
    </edge>
    <edge source="264" target="302">
      <data key="d8">64</data>
    </edge>
    <edge source="264" target="307">
      <data key="d8">2614</data>
    </edge>
    <edge source="264" target="308">
      <data key="d8">6004</data>
    </edge>
    <edge source="264" target="309">
      <data key="d8">1</data>
    </edge>
    <edge source="264" target="312">
      <data key="d8">70</data>
    </edge>
    <edge source="264" target="313">
      <data key="d8">661</data>
    </edge>
    <edge source="264" target="314">
      <data key="d8">5</data>
    </edge>
    <edge source="264" target="319">
      <data key="d8">41</data>
    </edge>
    <edge source="264" target="336">
      <data key="d8">16</data>
    </edge>
    <edge source="265" target="270">
      <data key="d8">4</data>
    </edge>
    <edge source="265" target="271">
      <data key="d8">3104</data>
    </edge>
    <edge source="265" target="274">
      <data key="d8">743</data>
    </edge>
    <edge source="265" target="278">
      <data key="d8">134</data>
    </edge>
    <edge source="265" target="279">
      <data key="d8">4</data>
    </edge>
    <edge source="265" target="280">
      <data key="d8">16</data>
    </edge>
    <edge source="265" target="302">
      <data key="d8">659</data>
    </edge>
    <edge source="265" target="303">
      <data key="d8">572</data>
    </edge>
    <edge source="265" target="307">
      <data key="d8">1066</data>
    </edge>
    <edge source="265" target="308">
      <data key="d8">22889</data>
    </edge>
    <edge source="265" target="309">
      <data key="d8">9553</data>
    </edge>
    <edge source="265" target="310">
      <data key="d8">35</data>
    </edge>
    <edge source="265" target="313">
      <data key="d8">327</data>
    </edge>
    <edge source="265" target="314">
      <data key="d8">1263</data>
    </edge>
    <edge source="265" target="315">
      <data key="d8">775</data>
    </edge>
    <edge source="265" target="316">
      <data key="d8">3</data>
    </edge>
    <edge source="265" target="266">
      <data key="d8">9526</data>
    </edge>
    <edge source="265" target="319">
      <data key="d8">41</data>
    </edge>
    <edge source="265" target="267">
      <data key="d8">11048</data>
    </edge>
    <edge source="265" target="273">
      <data key="d8">1489</data>
    </edge>
    <edge source="265" target="272">
      <data key="d8">7916</data>
    </edge>
    <edge source="265" target="336">
      <data key="d8">70</data>
    </edge>
    <edge source="265" target="277">
      <data key="d8">43</data>
    </edge>
    <edge source="266" target="267">
      <data key="d8">29046</data>
    </edge>
    <edge source="266" target="272">
      <data key="d8">2630</data>
    </edge>
    <edge source="266" target="274">
      <data key="d8">5501</data>
    </edge>
    <edge source="266" target="276">
      <data key="d8">52</data>
    </edge>
    <edge source="266" target="280">
      <data key="d8">125</data>
    </edge>
    <edge source="266" target="281">
      <data key="d8">1306</data>
    </edge>
    <edge source="266" target="282">
      <data key="d8">1057</data>
    </edge>
    <edge source="266" target="283">
      <data key="d8">107</data>
    </edge>
    <edge source="266" target="302">
      <data key="d8">60</data>
    </edge>
    <edge source="266" target="304">
      <data key="d8">28</data>
    </edge>
    <edge source="266" target="308">
      <data key="d8">6073</data>
    </edge>
    <edge source="266" target="309">
      <data key="d8">27541</data>
    </edge>
    <edge source="266" target="310">
      <data key="d8">1028</data>
    </edge>
    <edge source="266" target="314">
      <data key="d8">1129</data>
    </edge>
    <edge source="266" target="315">
      <data key="d8">1248</data>
    </edge>
    <edge source="266" target="316">
      <data key="d8">2</data>
    </edge>
    <edge source="266" target="324">
      <data key="d8">232</data>
    </edge>
    <edge source="266" target="303">
      <data key="d8">1022</data>
    </edge>
    <edge source="266" target="273">
      <data key="d8">3623</data>
    </edge>
    <edge source="266" target="323">
      <data key="d8">23</data>
    </edge>
    <edge source="266" target="275">
      <data key="d8">665</data>
    </edge>
    <edge source="266" target="268">
      <data key="d8">806</data>
    </edge>
    <edge source="267" target="268">
      <data key="d8">2355</data>
    </edge>
    <edge source="267" target="273">
      <data key="d8">2297</data>
    </edge>
    <edge source="267" target="275">
      <data key="d8">755</data>
    </edge>
    <edge source="267" target="276">
      <data key="d8">57</data>
    </edge>
    <edge source="267" target="281">
      <data key="d8">1385</data>
    </edge>
    <edge source="267" target="280">
      <data key="d8">43</data>
    </edge>
    <edge source="267" target="283">
      <data key="d8">107</data>
    </edge>
    <edge source="267" target="302">
      <data key="d8">52</data>
    </edge>
    <edge source="267" target="303">
      <data key="d8">1075</data>
    </edge>
    <edge source="267" target="304">
      <data key="d8">140</data>
    </edge>
    <edge source="267" target="308">
      <data key="d8">6119</data>
    </edge>
    <edge source="267" target="309">
      <data key="d8">30833</data>
    </edge>
    <edge source="267" target="310">
      <data key="d8">6687</data>
    </edge>
    <edge source="267" target="311">
      <data key="d8">239</data>
    </edge>
    <edge source="267" target="314">
      <data key="d8">1151</data>
    </edge>
    <edge source="267" target="315">
      <data key="d8">1512</data>
    </edge>
    <edge source="267" target="316">
      <data key="d8">916</data>
    </edge>
    <edge source="267" target="323">
      <data key="d8">23</data>
    </edge>
    <edge source="267" target="324">
      <data key="d8">232</data>
    </edge>
    <edge source="267" target="282">
      <data key="d8">1132</data>
    </edge>
    <edge source="267" target="341">
      <data key="d8">9</data>
    </edge>
    <edge source="267" target="274">
      <data key="d8">12268</data>
    </edge>
    <edge source="267" target="272">
      <data key="d8">3130</data>
    </edge>
    <edge source="267" target="317">
      <data key="d8">161</data>
    </edge>
    <edge source="268" target="269">
      <data key="d8">127</data>
    </edge>
    <edge source="268" target="274">
      <data key="d8">198</data>
    </edge>
    <edge source="268" target="275">
      <data key="d8">505</data>
    </edge>
    <edge source="268" target="276">
      <data key="d8">15</data>
    </edge>
    <edge source="268" target="309">
      <data key="d8">806</data>
    </edge>
    <edge source="268" target="310">
      <data key="d8">1</data>
    </edge>
    <edge source="268" target="311">
      <data key="d8">416</data>
    </edge>
    <edge source="268" target="317">
      <data key="d8">214</data>
    </edge>
    <edge source="269" target="276">
      <data key="d8">5</data>
    </edge>
    <edge source="270" target="278">
      <data key="d8">1595</data>
    </edge>
    <edge source="270" target="271">
      <data key="d8">3555</data>
    </edge>
    <edge source="270" target="272">
      <data key="d8">115</data>
    </edge>
    <edge source="270" target="306">
      <data key="d8">13</data>
    </edge>
    <edge source="270" target="340">
      <data key="d8">23</data>
    </edge>
    <edge source="270" target="277">
      <data key="d8">1168</data>
    </edge>
    <edge source="270" target="279">
      <data key="d8">57</data>
    </edge>
    <edge source="270" target="312">
      <data key="d8">631</data>
    </edge>
    <edge source="270" target="308">
      <data key="d8">4</data>
    </edge>
    <edge source="270" target="314">
      <data key="d8">55</data>
    </edge>
    <edge source="270" target="319">
      <data key="d8">3</data>
    </edge>
    <edge source="270" target="313">
      <data key="d8">227</data>
    </edge>
    <edge source="271" target="272">
      <data key="d8">4105</data>
    </edge>
    <edge source="271" target="277">
      <data key="d8">1117</data>
    </edge>
    <edge source="271" target="278">
      <data key="d8">3220</data>
    </edge>
    <edge source="271" target="279">
      <data key="d8">231</data>
    </edge>
    <edge source="271" target="307">
      <data key="d8">632</data>
    </edge>
    <edge source="271" target="308">
      <data key="d8">2328</data>
    </edge>
    <edge source="271" target="312">
      <data key="d8">731</data>
    </edge>
    <edge source="271" target="313">
      <data key="d8">4620</data>
    </edge>
    <edge source="271" target="314">
      <data key="d8">1732</data>
    </edge>
    <edge source="271" target="319">
      <data key="d8">118</data>
    </edge>
    <edge source="271" target="320">
      <data key="d8">70</data>
    </edge>
    <edge source="271" target="340">
      <data key="d8">115</data>
    </edge>
    <edge source="272" target="273">
      <data key="d8">5938</data>
    </edge>
    <edge source="272" target="274">
      <data key="d8">5475</data>
    </edge>
    <edge source="272" target="277">
      <data key="d8">356</data>
    </edge>
    <edge source="272" target="278">
      <data key="d8">3246</data>
    </edge>
    <edge source="272" target="279">
      <data key="d8">9585</data>
    </edge>
    <edge source="272" target="285">
      <data key="d8">34</data>
    </edge>
    <edge source="272" target="307">
      <data key="d8">72</data>
    </edge>
    <edge source="272" target="308">
      <data key="d8">4134</data>
    </edge>
    <edge source="272" target="309">
      <data key="d8">3337</data>
    </edge>
    <edge source="272" target="310">
      <data key="d8">35</data>
    </edge>
    <edge source="272" target="313">
      <data key="d8">2728</data>
    </edge>
    <edge source="272" target="314">
      <data key="d8">17289</data>
    </edge>
    <edge source="272" target="315">
      <data key="d8">6337</data>
    </edge>
    <edge source="272" target="316">
      <data key="d8">532</data>
    </edge>
    <edge source="272" target="320">
      <data key="d8">10</data>
    </edge>
    <edge source="272" target="321">
      <data key="d8">740</data>
    </edge>
    <edge source="272" target="340">
      <data key="d8">2301</data>
    </edge>
    <edge source="272" target="341">
      <data key="d8">1001</data>
    </edge>
    <edge source="272" target="280">
      <data key="d8">135</data>
    </edge>
    <edge source="273" target="274">
      <data key="d8">8528</data>
    </edge>
    <edge source="273" target="279">
      <data key="d8">127</data>
    </edge>
    <edge source="273" target="280">
      <data key="d8">2173</data>
    </edge>
    <edge source="273" target="281">
      <data key="d8">1439</data>
    </edge>
    <edge source="273" target="282">
      <data key="d8">1</data>
    </edge>
    <edge source="273" target="288">
      <data key="d8">78</data>
    </edge>
    <edge source="273" target="308">
      <data key="d8">1275</data>
    </edge>
    <edge source="273" target="309">
      <data key="d8">3312</data>
    </edge>
    <edge source="273" target="314">
      <data key="d8">3689</data>
    </edge>
    <edge source="273" target="315">
      <data key="d8">7693</data>
    </edge>
    <edge source="273" target="316">
      <data key="d8">309</data>
    </edge>
    <edge source="273" target="322">
      <data key="d8">18</data>
    </edge>
    <edge source="273" target="341">
      <data key="d8">1721</data>
    </edge>
    <edge source="274" target="275">
      <data key="d8">3478</data>
    </edge>
    <edge source="274" target="276">
      <data key="d8">218</data>
    </edge>
    <edge source="274" target="280">
      <data key="d8">2321</data>
    </edge>
    <edge source="274" target="281">
      <data key="d8">9374</data>
    </edge>
    <edge source="274" target="282">
      <data key="d8">2085</data>
    </edge>
    <edge source="274" target="288">
      <data key="d8">391</data>
    </edge>
    <edge source="274" target="308">
      <data key="d8">812</data>
    </edge>
    <edge source="274" target="309">
      <data key="d8">9970</data>
    </edge>
    <edge source="274" target="310">
      <data key="d8">4054</data>
    </edge>
    <edge source="274" target="283">
      <data key="d8">49</data>
    </edge>
    <edge source="274" target="314">
      <data key="d8">3692</data>
    </edge>
    <edge source="274" target="315">
      <data key="d8">13365</data>
    </edge>
    <edge source="274" target="316">
      <data key="d8">11808</data>
    </edge>
    <edge source="274" target="317">
      <data key="d8">1644</data>
    </edge>
    <edge source="274" target="279">
      <data key="d8">81</data>
    </edge>
    <edge source="274" target="322">
      <data key="d8">113</data>
    </edge>
    <edge source="274" target="323">
      <data key="d8">483</data>
    </edge>
    <edge source="274" target="324">
      <data key="d8">216</data>
    </edge>
    <edge source="274" target="341">
      <data key="d8">5671</data>
    </edge>
    <edge source="275" target="276">
      <data key="d8">1457</data>
    </edge>
    <edge source="275" target="281">
      <data key="d8">2459</data>
    </edge>
    <edge source="275" target="282">
      <data key="d8">2467</data>
    </edge>
    <edge source="275" target="283">
      <data key="d8">122</data>
    </edge>
    <edge source="275" target="309">
      <data key="d8">665</data>
    </edge>
    <edge source="275" target="311">
      <data key="d8">90</data>
    </edge>
    <edge source="275" target="316">
      <data key="d8">90</data>
    </edge>
    <edge source="275" target="317">
      <data key="d8">1914</data>
    </edge>
    <edge source="275" target="324">
      <data key="d8">119</data>
    </edge>
    <edge source="276" target="281">
      <data key="d8">621</data>
    </edge>
    <edge source="276" target="282">
      <data key="d8">605</data>
    </edge>
    <edge source="276" target="283">
      <data key="d8">108</data>
    </edge>
    <edge source="276" target="309">
      <data key="d8">52</data>
    </edge>
    <edge source="276" target="324">
      <data key="d8">46</data>
    </edge>
    <edge source="277" target="278">
      <data key="d8">3473</data>
    </edge>
    <edge source="277" target="279">
      <data key="d8">339</data>
    </edge>
    <edge source="277" target="284">
      <data key="d8">4</data>
    </edge>
    <edge source="277" target="285">
      <data key="d8">16</data>
    </edge>
    <edge source="277" target="308">
      <data key="d8">43</data>
    </edge>
    <edge source="277" target="314">
      <data key="d8">170</data>
    </edge>
    <edge source="277" target="319">
      <data key="d8">798</data>
    </edge>
    <edge source="277" target="320">
      <data key="d8">1</data>
    </edge>
    <edge source="277" target="340">
      <data key="d8">81</data>
    </edge>
    <edge source="278" target="279">
      <data key="d8">6980</data>
    </edge>
    <edge source="278" target="284">
      <data key="d8">2</data>
    </edge>
    <edge source="278" target="285">
      <data key="d8">2857</data>
    </edge>
    <edge source="278" target="286">
      <data key="d8">146</data>
    </edge>
    <edge source="278" target="308">
      <data key="d8">134</data>
    </edge>
    <edge source="278" target="313">
      <data key="d8">1061</data>
    </edge>
    <edge source="278" target="314">
      <data key="d8">1866</data>
    </edge>
    <edge source="278" target="319">
      <data key="d8">669</data>
    </edge>
    <edge source="278" target="320">
      <data key="d8">1125</data>
    </edge>
    <edge source="278" target="321">
      <data key="d8">1891</data>
    </edge>
    <edge source="278" target="340">
      <data key="d8">578</data>
    </edge>
    <edge source="279" target="280">
      <data key="d8">674</data>
    </edge>
    <edge source="279" target="285">
      <data key="d8">3557</data>
    </edge>
    <edge source="279" target="286">
      <data key="d8">4680</data>
    </edge>
    <edge source="279" target="287">
      <data key="d8">1</data>
    </edge>
    <edge source="279" target="308">
      <data key="d8">10</data>
    </edge>
    <edge source="279" target="309">
      <data key="d8">12</data>
    </edge>
    <edge source="279" target="313">
      <data key="d8">256</data>
    </edge>
    <edge source="279" target="314">
      <data key="d8">7894</data>
    </edge>
    <edge source="279" target="315">
      <data key="d8">743</data>
    </edge>
    <edge source="279" target="319">
      <data key="d8">4</data>
    </edge>
    <edge source="279" target="320">
      <data key="d8">1263</data>
    </edge>
    <edge source="279" target="321">
      <data key="d8">7452</data>
    </edge>
    <edge source="279" target="322">
      <data key="d8">246</data>
    </edge>
    <edge source="279" target="340">
      <data key="d8">2247</data>
    </edge>
    <edge source="279" target="344">
      <data key="d8">37</data>
    </edge>
    <edge source="280" target="281">
      <data key="d8">2273</data>
    </edge>
    <edge source="280" target="286">
      <data key="d8">174</data>
    </edge>
    <edge source="280" target="287">
      <data key="d8">460</data>
    </edge>
    <edge source="280" target="288">
      <data key="d8">679</data>
    </edge>
    <edge source="280" target="293">
      <data key="d8">1</data>
    </edge>
    <edge source="280" target="308">
      <data key="d8">17</data>
    </edge>
    <edge source="280" target="309">
      <data key="d8">110</data>
    </edge>
    <edge source="280" target="314">
      <data key="d8">92</data>
    </edge>
    <edge source="280" target="315">
      <data key="d8">1907</data>
    </edge>
    <edge source="280" target="316">
      <data key="d8">532</data>
    </edge>
    <edge source="280" target="322">
      <data key="d8">349</data>
    </edge>
    <edge source="280" target="323">
      <data key="d8">25</data>
    </edge>
    <edge source="280" target="341">
      <data key="d8">1349</data>
    </edge>
    <edge source="281" target="345">
      <data key="d8">6</data>
    </edge>
    <edge source="281" target="282">
      <data key="d8">5800</data>
    </edge>
    <edge source="281" target="283">
      <data key="d8">428</data>
    </edge>
    <edge source="281" target="346">
      <data key="d8">30</data>
    </edge>
    <edge source="281" target="288">
      <data key="d8">4330</data>
    </edge>
    <edge source="281" target="294">
      <data key="d8">67</data>
    </edge>
    <edge source="281" target="309">
      <data key="d8">1306</data>
    </edge>
    <edge source="281" target="287">
      <data key="d8">1</data>
    </edge>
    <edge source="281" target="316">
      <data key="d8">5014</data>
    </edge>
    <edge source="281" target="317">
      <data key="d8">410</data>
    </edge>
    <edge source="281" target="322">
      <data key="d8">1740</data>
    </edge>
    <edge source="281" target="323">
      <data key="d8">7299</data>
    </edge>
    <edge source="281" target="324">
      <data key="d8">1580</data>
    </edge>
    <edge source="281" target="341">
      <data key="d8">3046</data>
    </edge>
    <edge source="281" target="293">
      <data key="d8">1</data>
    </edge>
    <edge source="281" target="315">
      <data key="d8">6455</data>
    </edge>
    <edge source="282" target="283">
      <data key="d8">1877</data>
    </edge>
    <edge source="282" target="288">
      <data key="d8">753</data>
    </edge>
    <edge source="282" target="289">
      <data key="d8">1510</data>
    </edge>
    <edge source="282" target="309">
      <data key="d8">1057</data>
    </edge>
    <edge source="282" target="315">
      <data key="d8">102</data>
    </edge>
    <edge source="282" target="316">
      <data key="d8">112</data>
    </edge>
    <edge source="282" target="317">
      <data key="d8">281</data>
    </edge>
    <edge source="282" target="322">
      <data key="d8">7</data>
    </edge>
    <edge source="282" target="323">
      <data key="d8">779</data>
    </edge>
    <edge source="282" target="324">
      <data key="d8">1438</data>
    </edge>
    <edge source="282" target="341">
      <data key="d8">92</data>
    </edge>
    <edge source="283" target="288">
      <data key="d8">5</data>
    </edge>
    <edge source="283" target="309">
      <data key="d8">107</data>
    </edge>
    <edge source="283" target="315">
      <data key="d8">3</data>
    </edge>
    <edge source="283" target="322">
      <data key="d8">3</data>
    </edge>
    <edge source="283" target="323">
      <data key="d8">187</data>
    </edge>
    <edge source="283" target="324">
      <data key="d8">17</data>
    </edge>
    <edge source="284" target="285">
      <data key="d8">156</data>
    </edge>
    <edge source="285" target="344">
      <data key="d8">26</data>
    </edge>
    <edge source="285" target="286">
      <data key="d8">2186</data>
    </edge>
    <edge source="285" target="291">
      <data key="d8">129</data>
    </edge>
    <edge source="285" target="292">
      <data key="d8">33</data>
    </edge>
    <edge source="285" target="314">
      <data key="d8">34</data>
    </edge>
    <edge source="285" target="320">
      <data key="d8">770</data>
    </edge>
    <edge source="285" target="321">
      <data key="d8">2269</data>
    </edge>
    <edge source="285" target="322">
      <data key="d8">145</data>
    </edge>
    <edge source="285" target="327">
      <data key="d8">339</data>
    </edge>
    <edge source="286" target="287">
      <data key="d8">368</data>
    </edge>
    <edge source="286" target="292">
      <data key="d8">285</data>
    </edge>
    <edge source="286" target="314">
      <data key="d8">5</data>
    </edge>
    <edge source="286" target="320">
      <data key="d8">646</data>
    </edge>
    <edge source="286" target="321">
      <data key="d8">4512</data>
    </edge>
    <edge source="286" target="322">
      <data key="d8">240</data>
    </edge>
    <edge source="286" target="327">
      <data key="d8">91</data>
    </edge>
    <edge source="286" target="328">
      <data key="d8">1284</data>
    </edge>
    <edge source="286" target="329">
      <data key="d8">2</data>
    </edge>
    <edge source="286" target="344">
      <data key="d8">143</data>
    </edge>
    <edge source="287" target="288">
      <data key="d8">621</data>
    </edge>
    <edge source="287" target="322">
      <data key="d8">86</data>
    </edge>
    <edge source="287" target="293">
      <data key="d8">128</data>
    </edge>
    <edge source="287" target="294">
      <data key="d8">10</data>
    </edge>
    <edge source="287" target="328">
      <data key="d8">1</data>
    </edge>
    <edge source="287" target="329">
      <data key="d8">44</data>
    </edge>
    <edge source="288" target="289">
      <data key="d8">333</data>
    </edge>
    <edge source="288" target="293">
      <data key="d8">43</data>
    </edge>
    <edge source="288" target="294">
      <data key="d8">174</data>
    </edge>
    <edge source="288" target="295">
      <data key="d8">35</data>
    </edge>
    <edge source="288" target="315">
      <data key="d8">608</data>
    </edge>
    <edge source="288" target="316">
      <data key="d8">291</data>
    </edge>
    <edge source="288" target="322">
      <data key="d8">297</data>
    </edge>
    <edge source="288" target="323">
      <data key="d8">2001</data>
    </edge>
    <edge source="288" target="324">
      <data key="d8">36</data>
    </edge>
    <edge source="288" target="329">
      <data key="d8">18</data>
    </edge>
    <edge source="288" target="330">
      <data key="d8">520</data>
    </edge>
    <edge source="288" target="331">
      <data key="d8">53</data>
    </edge>
    <edge source="288" target="341">
      <data key="d8">252</data>
    </edge>
    <edge source="289" target="290">
      <data key="d8">35</data>
    </edge>
    <edge source="289" target="331">
      <data key="d8">73</data>
    </edge>
    <edge source="289" target="324">
      <data key="d8">285</data>
    </edge>
    <edge source="289" target="295">
      <data key="d8">249</data>
    </edge>
    <edge source="291" target="292">
      <data key="d8">45</data>
    </edge>
    <edge source="292" target="293">
      <data key="d8">210</data>
    </edge>
    <edge source="293" target="294">
      <data key="d8">203</data>
    </edge>
    <edge source="293" target="334">
      <data key="d8">3</data>
    </edge>
    <edge source="294" target="323">
      <data key="d8">60</data>
    </edge>
    <edge source="294" target="295">
      <data key="d8">23</data>
    </edge>
    <edge source="294" target="330">
      <data key="d8">10</data>
    </edge>
    <edge source="297" target="298">
      <data key="d8">62</data>
    </edge>
    <edge source="297" target="302">
      <data key="d8">54</data>
    </edge>
    <edge source="298" target="303">
      <data key="d8">40</data>
    </edge>
    <edge source="299" target="304">
      <data key="d8">11</data>
    </edge>
    <edge source="301" target="302">
      <data key="d8">214</data>
    </edge>
    <edge source="301" target="307">
      <data key="d8">23</data>
    </edge>
    <edge source="302" target="303">
      <data key="d8">610</data>
    </edge>
    <edge source="302" target="307">
      <data key="d8">1</data>
    </edge>
    <edge source="302" target="308">
      <data key="d8">1162</data>
    </edge>
    <edge source="302" target="309">
      <data key="d8">400</data>
    </edge>
    <edge source="303" target="304">
      <data key="d8">206</data>
    </edge>
    <edge source="303" target="308">
      <data key="d8">621</data>
    </edge>
    <edge source="303" target="309">
      <data key="d8">635</data>
    </edge>
    <edge source="303" target="310">
      <data key="d8">115</data>
    </edge>
    <edge source="304" target="310">
      <data key="d8">161</data>
    </edge>
    <edge source="304" target="305">
      <data key="d8">28</data>
    </edge>
    <edge source="304" target="309">
      <data key="d8">1</data>
    </edge>
    <edge source="305" target="311">
      <data key="d8">3</data>
    </edge>
    <edge source="306" target="312">
      <data key="d8">34</data>
    </edge>
    <edge source="307" target="308">
      <data key="d8">304</data>
    </edge>
    <edge source="307" target="312">
      <data key="d8">1</data>
    </edge>
    <edge source="307" target="313">
      <data key="d8">643</data>
    </edge>
    <edge source="308" target="309">
      <data key="d8">7118</data>
    </edge>
    <edge source="308" target="310">
      <data key="d8">3</data>
    </edge>
    <edge source="308" target="313">
      <data key="d8">412</data>
    </edge>
    <edge source="308" target="314">
      <data key="d8">1380</data>
    </edge>
    <edge source="308" target="315">
      <data key="d8">766</data>
    </edge>
    <edge source="308" target="319">
      <data key="d8">41</data>
    </edge>
    <edge source="308" target="336">
      <data key="d8">101</data>
    </edge>
    <edge source="309" target="310">
      <data key="d8">3898</data>
    </edge>
    <edge source="309" target="314">
      <data key="d8">1878</data>
    </edge>
    <edge source="309" target="315">
      <data key="d8">2829</data>
    </edge>
    <edge source="309" target="316">
      <data key="d8">379</data>
    </edge>
    <edge source="309" target="324">
      <data key="d8">232</data>
    </edge>
    <edge source="309" target="323">
      <data key="d8">23</data>
    </edge>
    <edge source="310" target="311">
      <data key="d8">295</data>
    </edge>
    <edge source="310" target="315">
      <data key="d8">53</data>
    </edge>
    <edge source="310" target="316">
      <data key="d8">614</data>
    </edge>
    <edge source="310" target="317">
      <data key="d8">191</data>
    </edge>
    <edge source="311" target="317">
      <data key="d8">282</data>
    </edge>
    <edge source="312" target="313">
      <data key="d8">556</data>
    </edge>
    <edge source="313" target="314">
      <data key="d8">2043</data>
    </edge>
    <edge source="313" target="320">
      <data key="d8">470</data>
    </edge>
    <edge source="313" target="321">
      <data key="d8">16</data>
    </edge>
    <edge source="314" target="315">
      <data key="d8">5467</data>
    </edge>
    <edge source="314" target="316">
      <data key="d8">191</data>
    </edge>
    <edge source="314" target="320">
      <data key="d8">62</data>
    </edge>
    <edge source="314" target="321">
      <data key="d8">1619</data>
    </edge>
    <edge source="314" target="340">
      <data key="d8">2621</data>
    </edge>
    <edge source="314" target="341">
      <data key="d8">522</data>
    </edge>
    <edge source="314" target="344">
      <data key="d8">20</data>
    </edge>
    <edge source="315" target="316">
      <data key="d8">6213</data>
    </edge>
    <edge source="315" target="321">
      <data key="d8">14</data>
    </edge>
    <edge source="315" target="322">
      <data key="d8">2110</data>
    </edge>
    <edge source="315" target="323">
      <data key="d8">1748</data>
    </edge>
    <edge source="315" target="340">
      <data key="d8">49</data>
    </edge>
    <edge source="315" target="341">
      <data key="d8">6156</data>
    </edge>
    <edge source="315" target="342">
      <data key="d8">72</data>
    </edge>
    <edge source="315" target="344">
      <data key="d8">11</data>
    </edge>
    <edge source="315" target="345">
      <data key="d8">2</data>
    </edge>
    <edge source="316" target="317">
      <data key="d8">681</data>
    </edge>
    <edge source="316" target="322">
      <data key="d8">62</data>
    </edge>
    <edge source="316" target="323">
      <data key="d8">917</data>
    </edge>
    <edge source="316" target="324">
      <data key="d8">26</data>
    </edge>
    <edge source="316" target="341">
      <data key="d8">4242</data>
    </edge>
    <edge source="316" target="342">
      <data key="d8">57</data>
    </edge>
    <edge source="317" target="324">
      <data key="d8">176</data>
    </edge>
    <edge source="319" target="320">
      <data key="d8">3</data>
    </edge>
    <edge source="320" target="321">
      <data key="d8">1243</data>
    </edge>
    <edge source="320" target="322">
      <data key="d8">10</data>
    </edge>
    <edge source="320" target="328">
      <data key="d8">131</data>
    </edge>
    <edge source="320" target="327">
      <data key="d8">55</data>
    </edge>
    <edge source="321" target="322">
      <data key="d8">384</data>
    </edge>
    <edge source="321" target="328">
      <data key="d8">1402</data>
    </edge>
    <edge source="321" target="340">
      <data key="d8">19</data>
    </edge>
    <edge source="321" target="344">
      <data key="d8">381</data>
    </edge>
    <edge source="322" target="323">
      <data key="d8">1946</data>
    </edge>
    <edge source="322" target="328">
      <data key="d8">17</data>
    </edge>
    <edge source="322" target="329">
      <data key="d8">194</data>
    </edge>
    <edge source="322" target="330">
      <data key="d8">229</data>
    </edge>
    <edge source="322" target="341">
      <data key="d8">280</data>
    </edge>
    <edge source="322" target="342">
      <data key="d8">34</data>
    </edge>
    <edge source="322" target="344">
      <data key="d8">5</data>
    </edge>
    <edge source="322" target="345">
      <data key="d8">314</data>
    </edge>
    <edge source="322" target="346">
      <data key="d8">2</data>
    </edge>
    <edge source="323" target="346">
      <data key="d8">90</data>
    </edge>
    <edge source="323" target="324">
      <data key="d8">353</data>
    </edge>
    <edge source="323" target="330">
      <data key="d8">560</data>
    </edge>
    <edge source="323" target="341">
      <data key="d8">409</data>
    </edge>
    <edge source="323" target="342">
      <data key="d8">52</data>
    </edge>
    <edge source="323" target="345">
      <data key="d8">169</data>
    </edge>
    <edge source="327" target="328">
      <data key="d8">144</data>
    </edge>
    <edge source="328" target="329">
      <data key="d8">75</data>
    </edge>
    <edge source="328" target="333">
      <data key="d8">2</data>
    </edge>
    <edge source="328" target="344">
      <data key="d8">106</data>
    </edge>
    <edge source="329" target="330">
      <data key="d8">110</data>
    </edge>
    <edge source="329" target="334">
      <data key="d8">2</data>
    </edge>
    <edge source="330" target="331">
      <data key="d8">69</data>
    </edge>
    <edge source="330" target="345">
      <data key="d8">29</data>
    </edge>
    <edge source="333" target="334">
      <data key="d8">3</data>
    </edge>
    <edge source="340" target="341">
      <data key="d8">1</data>
    </edge>
    <edge source="340" target="344">
      <data key="d8">2</data>
    </edge>
    <edge source="341" target="342">
      <data key="d8">43</data>
    </edge>
    <edge source="341" target="345">
      <data key="d8">13</data>
    </edge>
    <edge source="342" target="346">
      <data key="d8">1</data>
    </edge>
    <edge source="345" target="346">
      <data key="d8">1</data>
    </edge>
  </graph>
</graphml>
