# Supplementary material
Source: ML conference proceedings conference paper supplement (https://proceedings.neurips.cc/paper_files/paper/2021/hash/0919b5c38396c3f0c41f1112d538e42c-Abstract.html)
Supplement: Supplementary file 1 [file 0919b5c38396c3f0c41f1112d538e42c-Supplemental.zip › supplementary material/ICE/real_data/result/home_game.csv]

rmse	method	host
0.0529719660186713	USVT	USVT
0.0688822429621731	NS	USVT
0.0532785762070256	ICE	USVT
0.0667580233426376	USVT	NS
0.0553262861332759	NS	NS
0.0451415332159693	ICE	NS
0.0753958330117422	USVT	ICE
0.0667157105317542	NS	ICE
0.0472672166015039	ICE	ICE
