# Supplementary material
Source: ML conference proceedings conference paper supplement (https://proceedings.neurips.cc/paper_files/paper/2021/hash/0919b5c38396c3f0c41f1112d538e42c-Abstract.html)
Supplement: Supplementary file 1 [file 0919b5c38396c3f0c41f1112d538e42c-Supplemental.zip › supplementary material/ICE/real_data/result/link_pre.csv]

tp	fp	method
1	1	ICE
0.989179404408073	0.247216158132194	ICE
0.98499829623415	0.234103362828645	ICE
0.965799919972972	0.172247905948069	ICE
0.955840746028749	0.161968342907994	ICE
0.934436119449177	0.12569862726654	ICE
0.905850771001366	0.102467989688334	ICE
0.897102035083483	0.0978371393101687	ICE
0.87103358505359	0.0807388444901111	ICE
0.857051626458673	0.0773122350093707	ICE
0.837137143074814	0.0664656077006259	ICE
0.81544909836312	0.0554307722271976	ICE
0.81099338920659	0.0541894913607979	ICE
0.795324889137866	0.0471335545623945	ICE
0.790341983290894	0.0459453251720717	ICE
0.768137812822174	0.0389198846945868	ICE
0.754257962051065	0.0344376690794374	ICE
0.746921967734972	0.0330544025907902	ICE
0.726403472876523	0.0280487448860921	ICE
0.723807711678486	0.0275957995302018	ICE
0.701248564317651	0.0237115435428839	ICE
0.677227813344019	0.0203297404345368	ICE
0.676711934788213	0.0202595247237829	ICE
0.657964366270488	0.0179145936199448	ICE
0.654796391159485	0.0178446936517158	ICE
0.634433579719411	0.0154442098139451	ICE
0.618398996459856	0.0134848417635289	ICE
0.617619609150445	0.0134151189118642	ICE
0.597218111231693	0.0115222755111181	ICE
0.595905775273688	0.0114699833723697	ICE
0.579095629320141	0.0103850541277173	ICE
0.563155055693162	0.00936944154152425	ICE
0.559419907609512	0.00903663261323446	ICE
0.545786003034002	0.00803850872397555	ICE
0.54394165810542	0.00803850872397555	ICE
0.523318338313933	0.00714477128356162	ICE
0.507075122104987	0.00660240827873076	ICE
0.506287720530184	0.00655011613998229	ICE
0.487254399748568	0.00563990852606084	ICE
0.485679596598962	0.00560504710022852	ICE
0.467317742146281	0.0052538639662087	ICE
0.452471852958136	0.00478034485850957	ICE
0.452471852958136	0.00478034485850957	ICE
0.433561169651603	0.00420230121104634	ICE
0.433036235268401	0.00415000907229786	ICE
0.409757944412673	0.00367724135478242	ICE
0.39742526956072	0.00341552267680457	ICE
0.395063064836311	0.00341552267680457	ICE
0.376011540912534	0.00292441748885366	ICE
0.37496167214613	0.0029069867759375	ICE
0.362967137809646	0.00273102037158033	ICE
0.346026862809204	0.00243290056093408	ICE
0.346026862809204	0.00243290056093408	ICE
0.332123403496	0.00211879738335129	ICE
0.330811067537994	0.00211879738335129	ICE
0.312848103080344	0.00182128810092259	ICE
0.302398070642263	0.00171666937055622	ICE
0.301085734684258	0.00171666937055622	ICE
0.286570745104809	0.00136413406556563	ICE
0.286045810721607	0.00136413406556563	ICE
0.272824117550594	0.00122457099640738	ICE
0.260802686123099	0.000961251061461881	ICE
0.258165083719706	0.000926135450302275	ICE
0.24421779563158	0.000838259110562062	ICE
0.243167926865176	0.000838259110562062	ICE
0.224363268478457	0.000646180526548304	ICE
0.207801470572765	0.000558746383895026	ICE
0.207014068997962	0.000558746383895026	ICE
0.190771817655526	0.000418657927965486	ICE
0.190246883272324	0.000418657927965486	ICE
0.176346610265503	0.000348942142699474	ICE
0.156599232606901	0.000244540963883559	ICE
0.156599232606901	0.000244540963883559	ICE
0.141679783381389	0.00020951448361911	ICE
0.140892381806586	0.00020951448361911	ICE
0.118079645036356	0.000121843299729272	ICE
0.100780981462869	6.98497833021861e-05	ICE
0.100518514271268	6.98497833021861e-05	ICE
0.0806177118799129	1.75192711983181e-05	ICE
0.0798303103051098	1.75192711983181e-05	ICE
0.0649219458753937	1.75192711983181e-05	ICE
0.0477627394974823	0	ICE
0.0477627394974823	0	ICE
0.0404207573521416	0	ICE
0.0404207573521416	0	ICE
0.0293199570355977	0	ICE
0.0290693304691817	0	ICE
0.0198785657085738	0	ICE
0.0132401266704628	0	ICE
0.0132401266704628	0	ICE
0.00796394826917418	0	ICE
0.00397751694024702	0	ICE
0.00397751694024702	0	ICE
0.00237854493548121	0	ICE
0.00237854493548121	0	ICE
0.000812530569909498	0	ICE
0.000547278580519578	0	ICE
0.000547278580519578	0	ICE
0	0	ICE
0	0	ICE
0	0	ICE
0	0	ICE
1	1	NS
0.994472895629541	0.593384775700746	NS
0.982138686371189	0.408713887088066	NS
0.958898640176421	0.263386760370597	NS
0.924765557198952	0.190589516824858	NS
0.887817597446954	0.147414586573697	NS
0.860049886007558	0.120416224374394	NS
0.840130495256832	0.101387384074783	NS
0.816612121025975	0.086325905714929	NS
0.796069522025728	0.0744881406573136	NS
0.776548575064635	0.0655249534445339	NS
0.762581457787365	0.0572478007531711	NS
0.745247254529145	0.050048948112672	NS
0.725019932391729	0.0452190691853157	NS
0.711682255644759	0.0405312611828018	NS
0.69739314491946	0.0361383128369618	NS
0.685122947358354	0.0328824095200596	NS
0.671682826522469	0.0296604051793793	NS
0.657827770826167	0.0268596092243104	NS
0.643088510087162	0.024093050597488	NS
0.627649311994269	0.0218678670625343	NS
0.615041505754755	0.0195742255937481	NS
0.603980281436108	0.0174552993425229	NS
0.590266579265677	0.0155996631332	NS
0.574942084464918	0.0140091138115427	NS
0.560909650887659	0.0127317569998658	NS
0.547157309957703	0.0115386962207354	NS
0.534685223096249	0.0103474213526865	NS
0.522574962104437	0.00926208012856507	NS
0.509127515544016	0.00842005844900944	NS
0.498007060195052	0.00750850787637626	NS
0.482532189894713	0.00675465317069521	NS
0.470443804948378	0.00601829583846516	NS
0.458033815364609	0.00525038401182544	NS
0.444587961215326	0.00474426537861878	NS
0.428219827031462	0.00423859050429196	NS
0.415610257810496	0.0038537778464264	NS
0.399810757905794	0.00348684659632005	NS
0.389688714314842	0.00327639821093125	NS
0.375112392702374	0.00304849335470355	NS
0.359344222471902	0.00273243189079943	NS
0.345148755390773	0.00241730381905063	NS
0.329362247214785	0.00211886567476866	NS
0.315479917567164	0.0018564694522629	NS
0.299382325130537	0.00166417032394559	NS
0.280728539359053	0.00150657819893936	NS
0.262723350396874	0.00129681969531069	NS
0.24487594142341	0.0010683393912609	NS
0.230383197334215	0.000963142639996589	NS
0.220070871893686	0.00084052188708216	NS
0.203932651896142	0.000717589967740522	NS
0.192325623341462	0.000524077080488561	NS
0.179934883051775	0.000437245660185261	NS
0.169734331105966	0.00036691619860618	NS
0.159289870266246	0.000244527542669336	NS
0.149705997756947	0.000192058287356542	NS
0.1385821018773	0.000139538626251442	NS
0.130122644557939	0.000122068325762274	NS
0.120928414965932	0.000104598025273105	NS
0.114857164479122	8.70418454978244e-05	NS
0.107776185405037	5.23706722898751e-05	NS
0.100911644716154	3.4774332328587e-05	NS
0.0936008225072247	1.74703004891684e-05	NS
0.0841419137473379	1.74703004891684e-05	NS
0.0809614716252886	0	NS
0.0743677282976639	0	NS
0.0703851072720052	0	NS
0.062518975957332	0	NS
0.0576981666484481	0	NS
0.0521053066247137	0	NS
0.0468399654278175	0	NS
0.0458285568212688	0	NS
0.0410448715895469	0	NS
0.0363772808523584	0	NS
0.0305464348575976	0	NS
0.0260522403911658	0	NS
0.0224117980082682	0	NS
0.0194942558010213	0	NS
0.0160731900876271	0	NS
0.013439952457931	0	NS
0.0108146679347576	0	NS
0.0089687563705982	0	NS
0.00630117755877444	0	NS
0.0052684631894844	0	NS
0.00397342098136349	0	NS
0.00211229485570584	0	NS
0.00183832225296612	0	NS
0.00102453760098038	0	NS
0.000515631748563075	0	NS
0.00026246719160105	0	NS
0.00026246719160105	0	NS
0.00026246719160105	0	NS
0.00026246719160105	0	NS
0	0	NS
0	0	NS
0	0	NS
0	0	NS
0	0	NS
0	0	NS
0	0	NS
0	0	NS
0	0	NS
1	1	USVT
0.996437012867677	0.457174204415859	USVT
0.922771881625567	0.275437001107197	USVT
0.876503485284566	0.222984908899161	USVT
0.847156775903309	0.19004981570264	USVT
0.829039969229743	0.165076081728816	USVT
0.810802071667069	0.146621816463449	USVT
0.794737858600661	0.131168857781932	USVT
0.780102035034964	0.118304849934969	USVT
0.766355391000235	0.107174558996835	USVT
0.754763581135414	0.0977056043950109	USVT
0.744815241176583	0.0898991523028488	USVT
0.734046856447372	0.0830153188146274	USVT
0.721465204427037	0.0773968645873359	USVT
0.711723349489848	0.0716018981631944	USVT
0.701163785099229	0.065924489730434	USVT
0.694583788755904	0.0610231144482987	USVT
0.687147934757587	0.0568572679637384	USVT
0.680067834565491	0.0526213777563052	USVT
0.671637952446145	0.0490156027163246	USVT
0.663223814412408	0.0452361599306355	USVT
0.657171581424389	0.0417152489151773	USVT
0.647942074043966	0.0390371255090961	USVT
0.639810175539121	0.0366362303901293	USVT
0.632946358437845	0.0343067598876512	USVT
0.623215320439259	0.0313968331641341	USVT
0.614280733865061	0.0291915344844823	USVT
0.607447954034544	0.0264240913313501	USVT
0.597699058176739	0.0243604021700959	USVT
0.591115668410221	0.0226483614158008	USVT
0.584055371844144	0.0206861988333368	USVT
0.578017033136037	0.0190777741976163	USVT
0.570097312632593	0.0175382635685864	USVT
0.56399041471094	0.0160473384104121	USVT
0.556090958028415	0.0146654258683781	USVT
0.54732294858837	0.0134065195210339	USVT
0.53949063630097	0.0122884193327915	USVT
0.531560584071256	0.0112904550523484	USVT
0.521265727027362	0.010241321840891	USVT
0.510489762858842	0.00941855201359378	USVT
0.502277245611307	0.00871717048062518	USVT
0.492046319830798	0.00789411693724772	USVT
0.479595979389505	0.00703716770237404	USVT
0.470600388415171	0.00633644204020962	USVT
0.458670497818221	0.00572272065979358	USVT
0.446683267081362	0.00512671317932071	USVT
0.436436701397693	0.00460109220693383	USVT
0.424617810514266	0.00423406178070142	USVT
0.415652923439831	0.00383139384590309	USVT
0.402508667410579	0.00339258092954104	USVT
0.392529492780372	0.00299037562733209	USVT
0.380406884701955	0.00264065725908915	USVT
0.370368322576613	0.00232628405736411	USVT
0.355546801804689	0.00211665660714938	USVT
0.339870034323593	0.00187212512847398	USVT
0.327798590133507	0.00164566940949154	USVT
0.316410549381837	0.00145302960922614	USVT
0.304612727581537	0.00131278219822116	USVT
0.291247448666437	0.00119024758080286	USVT
0.278621114757749	0.00103220016089609	USVT
0.268236715925596	0.000892183247608603	USVT
0.252397625557744	0.000752111049412444	USVT
0.241122897304813	0.000577795103704999	USVT
0.227967729544782	0.000437525580463131	USVT
0.217919296372097	0.00036735009888688	USVT
0.208461161895472	0.000332344636270503	USVT
0.200738472033163	0.000279864124607088	USVT
0.18890588090971	0.000227781587879327	USVT
0.17654489131427	0.000192794695187888	USVT
0.165496635481736	0.000157789232571511	USVT
0.155153318565003	0.000105292451817893	USVT
0.145413634246815	8.79253104493625e-05	USVT
0.13569224057033	5.28216798999522e-05	USVT
0.126628233417213	5.28216798999522e-05	USVT
0.11869973046597	5.28216798999522e-05	USVT
0.107859103676826	5.28216798999522e-05	USVT
0.101226631721484	3.52655001246713e-05	USVT
0.0962261661678786	1.75192711983181e-05	USVT
0.0912487857552191	1.75192711983181e-05	USVT
0.0862238181142685	1.75192711983181e-05	USVT
0.0806251993911813	1.75192711983181e-05	USVT
0.0750548711610236	1.75192711983181e-05	USVT
0.0700134277011837	0	USVT
0.0636855788685099	0	USVT
0.0597459725599212	0	USVT
0.0573978230307785	0	USVT
0.0528640835661057	0	USVT
0.0502206802676487	0	USVT
0.0481167483685641	0	USVT
0.0460387004963493	0	USVT
0.0425861148118768	0	USVT
0.0391980261440822	0	USVT
0.0383920031663602	0	USVT
0.0346826345702425	0	USVT
0.032594956405787	0	USVT
0.0299361114608561	0	USVT
0.0286147990658525	0	USVT
0.0236953953621519	0	USVT
0.0213445478465617	0	USVT
0.0200243997934815	0	USVT
0.0165590120105279	0	USVT
0	0	USVT
