# Supplementary material
Source: ML conference proceedings conference paper supplement (https://proceedings.neurips.cc/paper_files/paper/2021/hash/0919b5c38396c3f0c41f1112d538e42c-Abstract.html)
Supplement: Supplementary file 1 [file 0919b5c38396c3f0c41f1112d538e42c-Supplemental.zip › supplementary material/ICE/simulation/data/gp1_P_1.csv]

V1	V2	V3	V4	V5	V6	V7	V8	V9	V10	V11	V12	V13	V14	V15	V16	V17	V18	V19	V20	V21	V22	V23	V24	V25	V26	V27	V28	V29	V30	V31	V32	V33	V34	V35	V36	V37	V38	V39	V40	V41	V42	V43	V44	V45	V46	V47	V48	V49	V50
0.888880987685048	0.888869135994512	0.888849383484218	0.888821730615056	0.888786178032255	0.888742726565367	0.888691377228243	0.888632131219009	0.888564989920033	0.888489954897891	0.888407027903322	0.888316210871186	0.88821750592041	0.888110915353936	0.887996441658657	0.887874087505355	0.887743855748628	0.887605749426817	0.887459771761926	0.887305926159537	0.887144216208721	0.886974645681943	0.886797218534961	0.886611938906729	0.886418811119279	0.886217839677614	0.886009029269586	0.885792384765773	0.885567911219353	0.885335613865967	0.885095498123585	0.884847569592359	0.88459183405448	0.884328297474018	0.884056965996774	0.883777845950109	0.883490943842781	0.883196266364772	0.88289382038711	0.882583612961689	0.882265651321079	0.881939942878335	0.881606495226802	0.881265316139913	0.88091641357098	0.880559795652983	0.880195470698355	0.87982344719876	0.879443733824867	0.879056339426115
0.888869135994512	0.888857284442246	0.8888375321624	0.888809879615859	0.888774327447847	0.888730876487911	0.888679527749893	0.88862028243191	0.88855314191632	0.888478107769685	0.888395181742731	0.888304365770302	0.88820566197131	0.888099072648677	0.887984600289278	0.887862247563872	0.887732017327037	0.887593912617089	0.887447936656007	0.887294092849345	0.887132384786147	0.886962816238846	0.886785391163173	0.886600113698046	0.886406988165464	0.886206019070393	0.88599721110065	0.885780569126774	0.885556098201903	0.885323803561636	0.885083690623901	0.884835764988806	0.884580032438494	0.88431649893699	0.884045170630046	0.883766053844972	0.883479155090475	0.883184481056484	0.882882038613973	0.882571834814778	0.882253876891413	0.881928172256875	0.881594728504447	0.881253553407501	0.880904654919284	0.880548041172712	0.880183720480154	0.879811701333204	0.879431992402461	0.879044602537296
0.888849383484218	0.8888375321624	0.888817780266628	0.888790128257783	0.888754576781081	0.888711126666056	0.888659778926538	0.888600534760628	0.888533395550666	0.888458362863194	0.888375438448914	0.888284624242646	0.888185922363273	0.888079335113687	0.887964864980731	0.887842514635129	0.88771228693142	0.887574184907882	0.887428211786451	0.887274370972637	0.887112666055434	0.88694310080723	0.8867656791837	0.88658040532371	0.8863872835492	0.886186318365081	0.885977514459103	0.885760876701744	0.885536410146075	0.885304120027626	0.885064011764253	0.884816090955991	0.884560363384906	0.884296835014945	0.884025511991778	0.883746400642633	0.883459507476129	0.883164839182108	0.882862402631452	0.882552204875905	0.882234253147883	0.881908554860287	0.881575117606298	0.881233949159186	0.880885057472091	0.880528450677823	0.880164137088638	0.879792125196018	0.879412423670448	0.879025041361179
0.888821730615056	0.888809879615859	0.888790128257783	0.888762477001701	0.888726926492816	0.888683477560648	0.888632131219009	0.888572888665976	0.888505751283865	0.888430720639189	0.888347798482617	0.888256986748935	0.888158287556986	0.888051703209621	0.887937236193636	0.887814889179706	0.887684665022319	0.887546566759696	0.887400597613713	0.887246760989819	0.887085060476942	0.886915499847399	0.886738083056795	0.886552814243916	0.886359697730627	0.886158738021751	0.885949939804956	0.885733307950628	0.885508847511745	0.885276563723741	0.885036462004372	0.884788547953569	0.884532827353292	0.884269306167378	0.883997990541383	0.883718886802417	0.88343200145898	0.883137341200789	0.882834912898599	0.882524723604024	0.882206780549347	0.881881091147328	0.881547662991011	0.881206503853518	0.880857621687844	0.880501024626646	0.880136720982026	0.879764719245308	0.879385028086815	0.878997656355634
0.888786178032255	0.888774327447847	0.888754576781081	0.888726926492816	0.888691377228243	0.888647929816859	0.888596585272454	0.888537344793077	0.888470209761011	0.888395181742731	0.888312262488867	0.888221453934157	0.888122758197395	0.888016177581378	0.887901714572843	0.887779371842403	0.887649152244476	0.887511058817213	0.887365094782415	0.887211263545447	0.887049568695156	0.886880014003768	0.886702603426793	0.886517341102922	0.886324231353916	0.886123278684492	0.885914487782206	0.88569786351733	0.885473410942721	0.88524113529369	0.885001041987863	0.884753136625039	0.884497424987041	0.884233913037564	0.883962606922017	0.883683512967361	0.883396637681941	0.883101987755314	0.882799570058072	0.882489391641661	0.88217145973819	0.881845781760245	0.881512365300687	0.881171218132452	0.880822348208346	0.880465763660831	0.880101472801809	0.879729484122403	0.879349806292727	0.878962448161655
0.888742726565367	0.888730876487911	0.888711126666056	0.888683477560648	0.888647929816859	0.888604484264163	0.88855314191632	0.888493903971346	0.888426771811481	0.888351747003157	0.888268831296954	0.888178026627552	0.888079335113687	0.887972759058087	0.887858300947418	0.887735963452216	0.887605749426817	0.887467661909284	0.887321704121324	0.887167879468206	0.88700619153867	0.886836644104836	0.886659241122099	0.886473986729029	0.886280885247263	0.886079941181387	0.885871159218823	0.885654544229699	0.885430101266728	0.885197835565068	0.88495775254219	0.884709857797728	0.884454157113338	0.884190656452542	0.88391936196057	0.8836402799642	0.883353416971588	0.883058779672096	0.882756374936115	0.882446209814887	0.882128291540309	0.881802627524752	0.881469225360854	0.881128092821326	0.880779237858741	0.880422668605323	0.880058393372731	0.87968642065184	0.879306759112509	0.878919417603353
0.888691377228243	0.888679527749893	0.888659778926538	0.888632131219009	0.888596585272454	0.88855314191632	0.888501802164332	0.888442567214466	0.888375438448914	0.888300417434056	0.88821750592041	0.888126705842593	0.888028019319266	0.88792144865308	0.887806996330616	0.887684665022319	0.887554457582428	0.887416377048901	0.887270426643336	0.887116609770886	0.886954930020169	0.886785391163173	0.886607997155161	0.886422752134561	0.886229660422861	0.886028726524495	0.885819955126722	0.885603351099506	0.885378919495385	0.885146665549339	0.884906594678652	0.884658712482767	0.884403024743141	0.884139537423092	0.88386825666764	0.883589188803344	0.883302340338135	0.883007717961148	0.882705328542537	0.8823951791333	0.882077276965087	0.88175162945001	0.88141824418045	0.881077128928845	0.880728291647497	0.880371740468347	0.880007483702769	0.879635529841342	0.879255887553625	0.878868565687929
0.888632131219009	0.88862028243191	0.888600534760628	0.888572888665976	0.888537344793077	0.888493903971346	0.888442567214466	0.888383335720366	0.888316210871186	0.888241194233243	0.888158287556986	0.888067492776957	0.887968812011732	0.887862247563872	0.887747801919861	0.887625477750039	0.887495277908531	0.887357205433177	0.887211263545447	0.887057455650361	0.886895785336394	0.886726256375388	0.886548872722448	0.886363638515838	0.886170558076878	0.885969635909821	0.885760876701744	0.885544285322418	0.88531986682418	0.885087626441804	0.884847569592359	0.884599701875068	0.884344029071159	0.884080557143713	0.883809292237506	0.883530240678847	0.88324340897541	0.882948803816062	0.882646432070687	0.882336300790001	0.882018417205367	0.881692788728605	0.881359422951788	0.881018327647051	0.880669510766375	0.880312980441379	0.879948744983104	0.87957681288179	0.879197192806652	0.878809893605645
0.888564989920033	0.88855314191632	0.888533395550666	0.888505751283865	0.888470209761011	0.888426771811481	0.888375438448914	0.888316210871186	0.888249090460375	0.888174078782727	0.888091177588615	0.888000388812492	0.887901714572843	0.887795157172125	0.88768071909671	0.887558403016819	0.887428211786451	0.887290148443309	0.887144216208721	0.886990418487553	0.886828758868122	0.886659241122099	0.886481869204413	0.886296647253144	0.886103579589418	0.885902670717288	0.885693925323619	0.885477348277964	0.885252944632436	0.885020719621573	0.884780678662201	0.884532827353292	0.884277171475815	0.884013716992584	0.883742470048098	0.883463436968382	0.883176624260819	0.882882038613973	0.88257968689742	0.882269576161558	0.881951713637426	0.881626106736507	0.881292763050535	0.880951690351292	0.8806028965904	0.880246389899112	0.879882178588092	0.879510271147197	0.879130676245248	0.878743402729802
0.888489954897891	0.888478107769685	0.888458362863194	0.888430720639189	0.888395181742731	0.888351747003157	0.888300417434056	0.888241194233243	0.888174078782727	0.888099072648677	0.888016177581378	0.887925395515189	0.887826728568486	0.887720179043612	0.887605749426817	0.887483442388187	0.88735326078158	0.887215207644547	0.887069286198255	0.886915499847399	0.886753852180119	0.886584346967897	0.886406988165464	0.886221779910694	0.886028726524495	0.885827832510697	0.88561910255593	0.885402541529503	0.885178154483277	0.884945946651526	0.884705923450807	0.88445809047981	0.884202453519214	0.883939018531534	0.883667791660961	0.883388779233203	0.883101987755314	0.882807423915524	0.882505094583063	0.882195006807973	0.88187716782093	0.881551585033044	0.881218266035666	0.880877218600185	0.880528450677823	0.880171970399422	0.879807786075226	0.879435906194663	0.879056339426115	0.878669094616691
0.888407027903322	0.888395181742731	0.888375438448914	0.888347798482617	0.888312262488867	0.888268831296954	0.88821750592041	0.888158287556986	0.888091177588615	0.888016177581378	0.887933289285466	0.887842514635129	0.887743855748628	0.887637314928179	0.887522894659894	0.887400597613713	0.887270426643336	0.887132384786147	0.886986475263135	0.886832701478808	0.886671067021106	0.886501575661304	0.886324231353916	0.886139038236586	0.885946000629983	0.885745123037689	0.885536410146075	0.88531986682418	0.885095498123585	0.884863309278276	0.884623305704508	0.884375493000663	0.884119876947098	0.883856463505998	0.883585258821213	0.8833062692181	0.883019501203351	0.882724961464827	0.882422656871372	0.88211259447264	0.881794781498901	0.881469225360854	0.881135933649428	0.880794914135577	0.880446174770081	0.880089723683327	0.879725569185096	0.87935371976434	0.878974184088958	0.878586971005562
0.888316210871186	0.888304365770302	0.888284624242646	0.888256986748935	0.888221453934157	0.888178026627552	0.888126705842593	0.888067492776957	0.888000388812492	0.887925395515189	0.887842514635129	0.887751748106447	0.887653098047277	0.887546566759696	0.887432156729665	0.887309870626963	0.887179711305118	0.88704168180133	0.886895785336394	0.886742025314613	0.88658040532371	0.886410929134731	0.88623360070195	0.886048424162762	0.885855403837576	0.885654544229699	0.885445850025219	0.88522932609288	0.885004977483957	0.884772809432119	0.884532827353292	0.884285036845518	0.884029443688804	0.883766053844972	0.883494873457499	0.883215908851358	0.882929166532845	0.882634653189412	0.882332375689488	0.882022341082295	0.881704556597664	0.881379029645842	0.881045767817293	0.880704778882498	0.880356070791751	0.879999651674941	0.879635529841342	0.879263713779385	0.878884212156439	0.878497033818573
0.88821750592041	0.88820566197131	0.888185922363273	0.888158287556986	0.888122758197395	0.888079335113687	0.888028019319266	0.887968812011732	0.887901714572843	0.887826728568486	0.887743855748628	0.887653098047277	0.887554457582428	0.887447936656007	0.887333537753812	0.887211263545447	0.887081116884253	0.88694310080723	0.886797218534961	0.886643473471527	0.886481869204413	0.886312409504419	0.886135098325559	0.885949939804956	0.885756938262733	0.885556098201903	0.885347424308243	0.885130921450179	0.884906594678652	0.884674449226985	0.884434490510749	0.884186724127615	0.88393115585721	0.883667791660961	0.883396637681941	0.883117700244702	0.882830985855113	0.882536501200182	0.882234253147883	0.881924248746973	0.881606495226802	0.881280999997127	0.880947770647907	0.880606814949109	0.880258140850497	0.879901756481421	0.879537670150602	0.879165890345907	0.878786425734127	0.878399285160741
0.888110915353936	0.888099072648677	0.888079335113687	0.888051703209621	0.888016177581378	0.887972759058087	0.88792144865308	0.887862247563872	0.887795157172125	0.887720179043612	0.887637314928179	0.887546566759696	0.887447936656007	0.887341426918876	0.887227040033924	0.887104778670567	0.886974645681943	0.886836644104836	0.886690777159602	0.886537048250079	0.886375460963499	0.886206019070393	0.886028726524495	0.885843587462633	0.885650606204626	0.885449787253162	0.88524113529369	0.885024655194286	0.884800352005534	0.884568230960383	0.884328297474018	0.884080557143713	0.883825015748681	0.883561679249925	0.88329055379008	0.883011645693246	0.882724961464827	0.882430507791353	0.882128291540309	0.881818319759946	0.881500599679097	0.881175138706987	0.880841944433034	0.880501024626646	0.880152387237018	0.879796040392915	0.879431992402461	0.879060251752914	0.878680827110441	0.878293727319885
0.887996441658657	0.887984600289278	0.887964864980731	0.887937236193636	0.887901714572843	0.887858300947418	0.887806996330616	0.887747801919861	0.88768071909671	0.887605749426817	0.887522894659894	0.887432156729665	0.887333537753812	0.887227040033924	0.887112666055434	0.886990418487553	0.886860300183202	0.886722314178936	0.886576463694862	0.886422752134561	0.886261183084991	0.886091760316395	0.885914487782206	0.885729369618937	0.885536410146075	0.885335613865967	0.885126985463702	0.884910529806986	0.884686251946014	0.884454157113338	0.884214250723727	0.883966538374027	0.883711025843008	0.883447719091218	0.883176624260819	0.882897747675427	0.882611095839947	0.882316675440398	0.882014493343733	0.881704556597664	0.881386872430469	0.881061448250802	0.880728291647497	0.880387410389363	0.880038812424983	0.879682505882496	0.879318499069383	0.878946800472248	0.878567418756589	0.878180362766563
0.887874087505355	0.887862247563872	0.887842514635129	0.887814889179706	0.887779371842403	0.887735963452216	0.887684665022319	0.887625477750039	0.887558403016819	0.887483442388187	0.887400597613713	0.887309870626963	0.887211263545447	0.887104778670567	0.886990418487553	0.8868681856654	0.886738083056795	0.886600113698046	0.886454280809	0.886300587792957	0.886139038236586	0.885969635909821	0.885792384765773	0.885607288940617	0.885414352753489	0.885213580706367	0.885004977483957	0.884788547953569	0.884564297164985	0.884332230350328	0.884092352923926	0.883844670482165	0.883589188803344	0.88332591384752	0.883054851756354	0.882776008852944	0.882489391641661	0.882195006807973	0.881892861218273	0.881582961919692	0.881265316139913	0.880939931286983	0.880606814949109	0.880265974894462	0.87991741907097	0.879561155606101	0.879197192806652	0.878825539158526	0.878446203326504	0.878059194154014
0.887743855748628	0.887732017327037	0.88771228693142	0.887684665022319	0.887649152244476	0.887605749426817	0.887554457582428	0.887495277908531	0.887428211786451	0.88735326078158	0.887270426643336	0.887179711305118	0.887081116884253	0.886974645681943	0.886860300183202	0.886738083056795	0.886607997155161	0.886470045514346	0.886324231353916	0.886170558076878	0.886009029269586	0.885839648701651	0.885662420325838	0.885477348277964	0.885284436876789	0.885083690623901	0.884875114203599	0.884658712482767	0.884434490510749	0.884202453519214	0.883962606922017	0.883714956315057	0.883459507476129	0.883196266364772	0.882925239122109	0.882646432070687	0.882359851714309	0.882065504737859	0.881763398007129	0.881453538568635	0.881135933649428	0.880810590656903	0.880477517178606	0.880136720982026	0.879788210014392	0.879431992402461	0.879068076452299	0.878696470649064	0.878317183656774	0.877930224318079
0.887605749426817	0.887593912617089	0.887574184907882	0.887546566759696	0.887511058817213	0.887467661909284	0.887416377048901	0.887357205433177	0.887290148443309	0.887215207644547	0.887132384786147	0.88704168180133	0.88694310080723	0.886836644104836	0.886722314178936	0.886600113698046	0.886470045514346	0.8863321126636	0.886186318365081	0.88603266602148	0.885871159218823	0.885701801726372	0.88552459749653	0.885339550664732	0.885146665549339	0.884945946651526	0.884737398655158	0.884521026426672	0.884296835014945	0.884064829651164	0.883825015748681	0.883577398902881	0.883321984891023	0.883058779672096	0.882787789386653	0.882509020356658	0.88222247908531	0.881928172256875	0.881626106736507	0.881316289570068	0.880998727983938	0.880673429384827	0.880340401359571	0.879999651674941	0.879651188277424	0.879295019293022	0.878931153027026	0.878559597963803	0.878180362766563	0.877793456277132
0.887459771761926	0.887447936656007	0.887428211786451	0.887400597613713	0.887365094782415	0.887321704121324	0.887270426643336	0.887211263545447	0.887144216208721	0.887069286198255	0.886986475263135	0.886895785336394	0.886797218534961	0.886690777159602	0.886576463694862	0.886454280809	0.886324231353916	0.886186318365081	0.886040545061452	0.885886914845392	0.885725431302577	0.885556098201903	0.885378919495385	0.885193899318059	0.885001041987863	0.884800352005534	0.88459183405448	0.884375493000663	0.884151333892468	0.88391936196057	0.883679582617796	0.88343200145898	0.883176624260819	0.882913456981717	0.882642505761629	0.882363776921898	0.882077276965087	0.881783012574806	0.881480990615538	0.881171218132452	0.88085370235122	0.880528450677823	0.880195470698355	0.879854770178819	0.879506357064923	0.879150239481867	0.878786425734127	0.878414924305231	0.878035743857537	0.877648893231995
0.887305926159537	0.887294092849345	0.887274370972637	0.887246760989819	0.887211263545447	0.887167879468206	0.887116609770886	0.887057455650361	0.886990418487553	0.886915499847399	0.886832701478808	0.886742025314613	0.886643473471527	0.886537048250079	0.886422752134561	0.886300587792957	0.886170558076878	0.88603266602148	0.885886914845392	0.885733307950628	0.885571848922495	0.885402541529503	0.885225389723263	0.885040397638382	0.884847569592359	0.884646910085466	0.884438423800631	0.884222115603314	0.883997990541383	0.883766053844972	0.883526310926352	0.88327876737978	0.88302342898136	0.882760301688879	0.882489391641661	0.882210705160395	0.881924248746973	0.881630029084315	0.881328053036194	0.881018327647051	0.880700860141811	0.880375657925687	0.880042728583987	0.87970207988191	0.87935371976434	0.878997656355634	0.878633897959404	0.878262453058298	0.877883330313773	0.877496538565859
0.887144216208721	0.887132384786147	0.887112666055434	0.887085060476942	0.887049568695156	0.88700619153867	0.886954930020169	0.886895785336394	0.886828758868122	0.886753852180119	0.886671067021106	0.88658040532371	0.886481869204413	0.886375460963499	0.886261183084991	0.886139038236586	0.886009029269586	0.885871159218823	0.885725431302577	0.885571848922495	0.885410415663499	0.88524113529369	0.885064011764253	0.884879049209351	0.884686251946014	0.884485624474028	0.884277171475815	0.884060897816312	0.883836808542836	0.883604908884958	0.883365204254363	0.883117700244702	0.882862402631452	0.882599317371756	0.88232845060427	0.882049808649	0.881763398007129	0.881469225360854	0.881167297573201	0.880857621687844	0.880540204928923	0.880215054700845	0.879882178588092	0.879541584355016	0.879193279945635	0.878837273483419	0.878473573271075	0.878102187790323	0.877723125701672	0.877336395844187
0.886974645681943	0.886962816238846	0.88694310080723	0.886915499847399	0.886880014003768	0.886836644104836	0.886785391163173	0.886726256375388	0.886659241122099	0.886584346967897	0.886501575661304	0.886410929134731	0.886312409504419	0.886206019070393	0.886091760316395	0.885969635909821	0.885839648701651	0.885701801726372	0.885556098201903	0.885402541529503	0.88524113529369	0.885071883262139	0.884894789385587	0.884709857797728	0.884517092815103	0.88431649893699	0.884108080845279	0.883891843404354	0.883667791660961	0.883435930844078	0.883196266364772	0.882948803816062	0.882693548972767	0.882430507791353	0.882159686409779	0.881881091147328	0.881594728504447	0.881300605162569	0.880998727983938	0.880689104011426	0.880371740468347	0.880046644758264	0.87971382446479	0.879373287351393	0.879025041361179	0.878669094616691	0.878305455419682	0.877934132250902	0.877555133769866	0.877168468814626
0.886797218534961	0.886785391163173	0.8867656791837	0.886738083056795	0.886702603426793	0.886659241122099	0.886607997155161	0.886548872722448	0.886481869204413	0.886406988165464	0.886324231353916	0.88623360070195	0.886135098325559	0.886028726524495	0.885914487782206	0.885792384765773	0.885662420325838	0.88552459749653	0.885378919495385	0.885225389723263	0.885064011764253	0.884894789385587	0.884717726537532	0.884532827353292	0.884340096148899	0.884139537423092	0.88393115585721	0.883714956315057	0.883490943842781	0.883259123668737	0.883019501203351	0.882772082038977	0.882516871949745	0.882253876891413	0.881983103001209	0.881704556597664	0.88141824418045	0.881124172430202	0.880822348208346	0.880512778556913	0.880195470698355	0.879870432035348	0.879537670150602	0.879197192806652	0.878849007945656	0.878493123689182	0.878129548337988	0.877758290371808	0.877379358449116	0.876992761406902
0.886611938906729	0.886600113698046	0.88658040532371	0.886552814243916	0.886517341102922	0.886473986729029	0.886422752134561	0.886363638515838	0.886296647253144	0.886221779910694	0.886139038236586	0.886048424162762	0.885949939804956	0.885843587462633	0.885729369618937	0.885607288940617	0.885477348277964	0.885339550664732	0.885193899318059	0.885040397638382	0.884879049209351	0.884709857797728	0.884532827353292	0.884347962008737	0.884155266079557	0.883954744063937	0.883746400642633	0.883530240678847	0.8833062692181	0.8830744914881	0.882834912898599	0.882587539041257	0.882332375689488	0.882069428798308	0.881798704504181	0.881520209124853	0.881233949159186	0.880939931286983	0.880638162368815	0.880328649445834	0.880011399739592	0.87968642065184	0.87935371976434	0.879013304838658	0.878665183815958	0.878309364816791	0.877945856140877	0.877574666266886	0.877195803852207	0.87680927773272
0.886418811119279	0.886406988165464	0.8863872835492	0.886359697730627	0.886324231353916	0.886280885247263	0.886229660422861	0.886170558076878	0.886103579589418	0.886028726524495	0.885946000629983	0.885855403837576	0.885756938262733	0.885650606204626	0.885536410146075	0.885414352753489	0.885284436876789	0.885146665549339	0.885001041987863	0.884847569592359	0.884686251946014	0.884517092815103	0.884340096148899	0.884155266079557	0.883962606922017	0.883762123173882	0.883553819515302	0.883337700808852	0.883113772099398	0.882882038613973	0.882642505761629	0.8823951791333	0.882140064501652	0.88187716782093	0.881606495226802	0.881328053036194	0.881041847747123	0.880747886038526	0.880446174770081	0.880136720982026	0.879819531894971	0.879494614909705	0.879161977607002	0.878821627747416	0.878473573271075	0.878117822297471	0.877754383125241	0.877383264231944	0.87700447427384	0.876618022085652
0.886217839677614	0.886206019070393	0.886186318365081	0.886158738021751	0.886123278684492	0.886079941181387	0.886028726524495	0.885969635909821	0.885902670717288	0.885827832510697	0.885745123037689	0.885654544229699	0.885556098201903	0.885449787253162	0.885335613865967	0.885213580706367	0.885083690623901	0.884945946651526	0.884800352005534	0.884646910085466	0.884485624474028	0.88431649893699	0.884139537423092	0.883954744063937	0.883762123173882	0.883561679249925	0.883353416971588	0.883137341200789	0.882913456981717	0.882681769540698	0.882442284286057	0.882195006807973	0.881939942878335	0.881677098450583	0.881406479659555	0.881128092821326	0.880841944433034	0.880548041172712	0.880246389899112	0.879936997651516	0.879619871649557	0.879295019293022	0.878962448161655	0.878622166014959	0.878274180791984	0.877918500611116	0.877555133769866	0.877184088744641	0.876805374190519	0.876418998941023
0.886009029269586	0.88599721110065	0.885977514459103	0.885949939804956	0.885914487782206	0.885871159218823	0.885819955126722	0.885760876701744	0.885693925323619	0.88561910255593	0.885536410146075	0.885445850025219	0.885347424308243	0.88524113529369	0.885126985463702	0.885004977483957	0.884875114203599	0.884737398655158	0.88459183405448	0.884438423800631	0.884277171475815	0.884108080845279	0.88393115585721	0.883746400642633	0.883553819515302	0.883353416971588	0.883145197690356	0.882929166532845	0.882705328542537	0.882473688945028	0.882234253147883	0.881987026740499	0.881732015493954	0.881469225360854	0.881198662475177	0.880920333152109	0.880634243887875	0.880340401359571	0.880038812424983	0.879729484122403	0.879412423670448	0.879087638467861	0.87875513609332	0.878414924305231	0.878067011041525	0.877711404419441	0.877348112735318	0.876977144464363	0.876598508260431	0.876212212955794
0.885792384765773	0.885780569126774	0.885760876701744	0.885733307950628	0.88569786351733	0.885654544229699	0.885603351099506	0.885544285322418	0.885477348277964	0.885402541529503	0.88531986682418	0.88522932609288	0.885130921450179	0.885024655194286	0.884910529806986	0.884788547953569	0.884658712482767	0.884521026426672	0.884375493000663	0.884222115603314	0.884060897816312	0.883891843404354	0.883714956315057	0.883530240678847	0.883337700808852	0.883137341200789	0.882929166532845	0.882713181665552	0.882489391641661	0.882257801686006	0.882018417205367	0.881771243788328	0.881516287205126	0.881253553407501	0.880983048528536	0.880704778882498	0.880418750964665	0.880124971451158	0.87982344719876	0.879514185244738	0.879197192806652	0.878872477282165	0.878540046248844	0.878199907463961	0.877852068864282	0.877496538565859	0.877133324863811	0.876762436232103	0.87638388132332	0.875997668968433
0.885567911219353	0.885556098201903	0.885536410146075	0.885508847511745	0.885473410942721	0.885430101266728	0.885378919495385	0.88531986682418	0.885252944632436	0.885178154483277	0.885095498123585	0.885004977483957	0.884906594678652	0.884800352005534	0.884686251946014	0.884564297164985	0.884434490510749	0.884296835014945	0.884151333892468	0.883997990541383	0.883836808542836	0.883667791660961	0.883490943842781	0.8833062692181	0.883113772099398	0.882913456981717	0.882705328542537	0.882489391641661	0.882265651321079	0.882034112804837	0.881794781498901	0.881547662991011	0.881292763050535	0.881030087628314	0.880759642856505	0.880481435048419	0.880195470698355	0.879901756481421	0.879600299253366	0.87929110605039	0.878974184088958	0.878649540765613	0.878317183656774	0.877977120518532	0.877629359286452	0.87727390807535	0.876910775179086	0.876539969070334	0.876161498400361	0.875775371998795
0.885335613865967	0.885323803561636	0.885304120027626	0.885276563723741	0.88524113529369	0.885197835565068	0.885146665549339	0.885087626441804	0.885020719621573	0.884945946651526	0.884863309278276	0.884772809432119	0.884674449226985	0.884568230960383	0.884454157113338	0.884332230350328	0.884202453519214	0.884064829651164	0.88391936196057	0.883766053844972	0.883604908884958	0.883435930844078	0.883259123668737	0.8830744914881	0.882882038613973	0.882681769540698	0.882473688945028	0.882257801686006	0.882034112804837	0.881802627524752	0.881563351250873	0.881316289570068	0.881061448250802	0.880798833242988	0.880528450677823	0.880250306867632	0.879964408305694	0.879670761666076	0.87936937380345	0.879060251752914	0.878743402729802	0.878418834129494	0.87808655352722	0.877746568677854	0.877398887515711	0.877043518154333	0.876680468886271	0.876309748182867	0.875931364694025	0.875545327247978
0.885095498123585	0.885083690623901	0.885064011764253	0.885036462004372	0.885001041987863	0.88495775254219	0.884906594678652	0.884847569592359	0.884780678662201	0.884705923450807	0.884623305704508	0.884532827353292	0.884434490510749	0.884328297474018	0.884214250723727	0.884092352923926	0.883962606922017	0.883825015748681	0.883679582617796	0.883526310926352	0.883365204254363	0.883196266364772	0.883019501203351	0.882834912898599	0.882642505761629	0.882442284286057	0.882234253147883	0.882018417205367	0.881794781498901	0.881563351250873	0.881324131865533	0.881077128928845	0.880822348208346	0.880559795652983	0.880289477392964	0.880011399739592	0.879725569185096	0.879431992402461	0.879130676245248	0.878821627747416	0.878504854123127	0.878180362766563	0.877848161251722	0.877508257332218	0.877160658941077	0.876805374190519	0.876442411371748	0.876071778954724	0.875693485587941	0.875307540098191
0.884847569592359	0.884835764988806	0.884816090955991	0.884788547953569	0.884753136625039	0.884709857797728	0.884658712482767	0.884599701875068	0.884532827353292	0.88445809047981	0.884375493000663	0.884285036845518	0.884186724127615	0.884080557143713	0.883966538374027	0.883844670482165	0.883714956315057	0.883577398902881	0.88343200145898	0.88327876737978	0.883117700244702	0.882948803816062	0.882772082038977	0.882587539041257	0.8823951791333	0.882195006807973	0.881987026740499	0.881771243788328	0.881547662991011	0.881316289570068	0.881077128928845	0.880830186652378	0.880575468507237	0.880312980441379	0.880042728583987	0.879764719245308	0.879478958916488	0.879185454269393	0.878884212156439	0.878575239610405	0.878258543844246	0.877934132250902	0.877602012403102	0.877262192053159	0.876914679132765	0.876559481752777	0.876196608203005	0.875826066951984	0.87544786664675	0.875062016112611
0.88459183405448	0.884580032438494	0.884560363384906	0.884532827353292	0.884497424987041	0.884454157113338	0.884403024743141	0.884344029071159	0.884277171475815	0.884202453519214	0.884119876947098	0.884029443688804	0.88393115585721	0.883825015748681	0.883711025843008	0.883589188803344	0.883459507476129	0.883321984891023	0.883176624260819	0.88302342898136	0.882862402631452	0.882693548972767	0.882516871949745	0.882332375689488	0.882140064501652	0.881939942878335	0.881732015493954	0.881516287205126	0.881292763050535	0.881061448250802	0.880822348208346	0.880575468507237	0.880320814913055	0.880058393372731	0.879788210014392	0.879510271147197	0.879224583261169	0.878931153027026	0.878629987295997	0.878321093099647	0.878004477649684	0.877680148337769	0.877348112735318	0.877008378593302	0.876660953842038	0.876305846590978	0.87594306512849	0.87557261792164	0.875194513615963	0.874808761035228
0.884328297474018	0.88431649893699	0.884296835014945	0.884269306167378	0.884233913037564	0.884190656452542	0.884139537423092	0.884080557143713	0.884013716992584	0.883939018531534	0.883856463505998	0.883766053844972	0.883667791660961	0.883561679249925	0.883447719091218	0.88332591384752	0.883196266364772	0.883058779672096	0.882913456981717	0.882760301688879	0.882599317371756	0.882430507791353	0.882253876891413	0.882069428798308	0.88187716782093	0.881677098450583	0.881469225360854	0.881253553407501	0.881030087628314	0.880798833242988	0.880559795652983	0.880312980441379	0.880058393372731	0.879796040392915	0.879525927628966	0.879248061388924	0.878962448161655	0.878669094616691	0.87836800760404	0.878059194154014	0.877742661477035	0.877418416963444	0.877086468183309	0.876746822886214	0.876399489001059	0.876044474635845	0.875681788077458	0.875311437791448	0.874933432421798	0.8745477807907
0.884056965996774	0.884045170630046	0.884025511991778	0.883997990541383	0.883962606922017	0.88391936196057	0.88386825666764	0.883809292237506	0.883742470048098	0.883667791660961	0.883585258821213	0.883494873457499	0.883396637681941	0.88329055379008	0.883176624260819	0.883054851756354	0.882925239122109	0.882787789386653	0.882642505761629	0.882489391641661	0.88232845060427	0.882159686409779	0.881983103001209	0.881798704504181	0.881606495226802	0.881406479659555	0.881198662475177	0.880983048528536	0.880759642856505	0.880528450677823	0.880289477392964	0.880042728583987	0.879788210014392	0.879525927628966	0.879255887553625	0.878978096095249	0.87869255974152	0.878399285160741	0.878098279201668	0.87778954889332	0.877473101444795	0.877148944245077	0.876817084862839	0.876477531046242	0.876130290722725	0.875775371998795	0.875412783159811	0.875042532669761	0.874664629171033	0.874279081484188
0.883777845950109	0.883766053844972	0.883746400642633	0.883718886802417	0.883683512967361	0.8836402799642	0.883589188803344	0.883530240678847	0.883463436968382	0.883388779233203	0.8833062692181	0.883215908851358	0.883117700244702	0.883011645693246	0.882897747675427	0.882776008852944	0.882646432070687	0.882509020356658	0.882363776921898	0.882210705160395	0.882049808649	0.881881091147328	0.881704556597664	0.881520209124853	0.881328053036194	0.881128092821326	0.880920333152109	0.880704778882498	0.880481435048419	0.880250306867632	0.880011399739592	0.879764719245308	0.879510271147197	0.879248061388924	0.878978096095249	0.878700381571867	0.878414924305231	0.878121730962391	0.877820808390805	0.877512163618165	0.877195803852207	0.876871736480516	0.876539969070334	0.876200509368352	0.87585336530051	0.875498544971776	0.875136056665937	0.874765908845373	0.874388110150833	0.874002669401198
0.883490943842781	0.883479155090475	0.883459507476129	0.88343200145898	0.883396637681941	0.883353416971588	0.883302340338135	0.88324340897541	0.883176624260819	0.883101987755314	0.883019501203351	0.882929166532845	0.882830985855113	0.882724961464827	0.882611095839947	0.882489391641661	0.882359851714309	0.88222247908531	0.882077276965087	0.881924248746973	0.881763398007129	0.881594728504447	0.88141824418045	0.881233949159186	0.881041847747123	0.880841944433034	0.880634243887875	0.880418750964665	0.880195470698355	0.879964408305694	0.879725569185096	0.879478958916488	0.879224583261169	0.878962448161655	0.87869255974152	0.878414924305231	0.878129548337988	0.877836438505543	0.877535601654025	0.877227044809762	0.876910775179086	0.876586800148146	0.87625512728271	0.875915764327962	0.875568719208295	0.875214000027098	0.87485161506654	0.87448157278735	0.874103881828587	0.873718551007408
0.883196266364772	0.883184481056484	0.883164839182108	0.883137341200789	0.883101987755314	0.883058779672096	0.883007717961148	0.882948803816062	0.882882038613973	0.882807423915524	0.882724961464827	0.882634653189412	0.882536501200182	0.882430507791353	0.882316675440398	0.882195006807973	0.882065504737859	0.881928172256875	0.881783012574806	0.881630029084315	0.881469225360854	0.881300605162569	0.881124172430202	0.880939931286983	0.880747886038526	0.880548041172712	0.880340401359571	0.880124971451158	0.879901756481421	0.879670761666076	0.879431992402461	0.879185454269393	0.878931153027026	0.878669094616691	0.878399285160741	0.878121730962391	0.877836438505543	0.877543414454621	0.877242665654388	0.876934199129767	0.876618022085652	0.876294141906714	0.875962566157208	0.875623302580767	0.875276359100196	0.87492174381726	0.874559465012469	0.874189531144853	0.873811950851735	0.873426732948501
0.88289382038711	0.882882038613973	0.882862402631452	0.882834912898599	0.882799570058072	0.882756374936115	0.882705328542537	0.882646432070687	0.88257968689742	0.882505094583063	0.882422656871372	0.882332375689488	0.882234253147883	0.882128291540309	0.882014493343733	0.881892861218273	0.881763398007129	0.881626106736507	0.881480990615538	0.881328053036194	0.881167297573201	0.880998727983938	0.880822348208346	0.880638162368815	0.880446174770081	0.880246389899112	0.880038812424983	0.87982344719876	0.879600299253366	0.87936937380345	0.879130676245248	0.878884212156439	0.878629987295997	0.87836800760404	0.878098279201668	0.877820808390805	0.877535601654025	0.877242665654388	0.876942007235253	0.876633633420102	0.876317551412349	0.875993768595151	0.875662292531208	0.87532313096256	0.874976291810383	0.874621783174776	0.87425961333454	0.873889790746964	0.873512324047588	0.873127222049982
0.882583612961689	0.882571834814778	0.882552204875905	0.882524723604024	0.882489391641661	0.882446209814887	0.8823951791333	0.882336300790001	0.882269576161558	0.882195006807973	0.88211259447264	0.882022341082295	0.881924248746973	0.881818319759946	0.881704556597664	0.881582961919692	0.881453538568635	0.881316289570068	0.881171218132452	0.881018327647051	0.880857621687844	0.880689104011426	0.880512778556913	0.880328649445834	0.880136720982026	0.879936997651516	0.879729484122403	0.879514185244738	0.87929110605039	0.879060251752914	0.878821627747416	0.878575239610405	0.878321093099647	0.878059194154014	0.87778954889332	0.877512163618165	0.877227044809762	0.876934199129767	0.876633633420102	0.876325354702768	0.876009370179665	0.875685687232391	0.875354313422052	0.875015256489055	0.874668524352904	0.874314125111985	0.873952067043352	0.873582358602502	0.87320500842315	0.872820025316997
0.882265651321079	0.882253876891413	0.882234253147883	0.882206780549347	0.88217145973819	0.882128291540309	0.882077276965087	0.882018417205367	0.881951713637426	0.88187716782093	0.881794781498901	0.881704556597664	0.881606495226802	0.881500599679097	0.881386872430469	0.881265316139913	0.881135933649428	0.880998727983938	0.88085370235122	0.880700860141811	0.880540204928923	0.880371740468347	0.880195470698355	0.880011399739592	0.879819531894971	0.879619871649557	0.879412423670448	0.879197192806652	0.878974184088958	0.878743402729802	0.878504854123127	0.878258543844246	0.878004477649684	0.877742661477035	0.877473101444795	0.877195803852207	0.876910775179086	0.876618022085652	0.876317551412349	0.876009370179665	0.875693485587941	0.87536990501718	0.875038636026854	0.874699686355695	0.87435306392149	0.873998776820872	0.8736368333291	0.873267241899836	0.872890011164922	0.872505149934144
0.881939942878335	0.881928172256875	0.881908554860287	0.881881091147328	0.881845781760245	0.881802627524752	0.88175162945001	0.881692788728605	0.881626106736507	0.881551585033044	0.881469225360854	0.881379029645842	0.881280999997127	0.881175138706987	0.881061448250802	0.880939931286983	0.880810590656903	0.880673429384827	0.880528450677823	0.880375657925687	0.880215054700845	0.880046644758264	0.879870432035348	0.87968642065184	0.879494614909705	0.879295019293022	0.879087638467861	0.878872477282165	0.878649540765613	0.878418834129494	0.878180362766563	0.877934132250902	0.877680148337769	0.877418416963444	0.877148944245077	0.876871736480516	0.876586800148146	0.876294141906714	0.875993768595151	0.875685687232391	0.87536990501718	0.875046429327888	0.874715267722309	0.874376427937458	0.874029917889366	0.873675745672868	0.873313919561382	0.872944448006693	0.872567339638719	0.872182603265286
0.881606495226802	0.881594728504447	0.881575117606298	0.881547662991011	0.881512365300687	0.881469225360854	0.88141824418045	0.881359422951788	0.881292763050535	0.881218266035666	0.881135933649428	0.881045767817293	0.880947770647907	0.880841944433034	0.880728291647497	0.880606814949109	0.880477517178606	0.880340401359571	0.880195470698355	0.880042728583987	0.879882178588092	0.87971382446479	0.879537670150602	0.87935371976434	0.879161977607002	0.878962448161655	0.87875513609332	0.878540046248844	0.878317183656774	0.87808655352722	0.877848161251722	0.877602012403102	0.877348112735318	0.877086468183309	0.876817084862839	0.876539969070334	0.87625512728271	0.875962566157208	0.875662292531208	0.875354313422052	0.875038636026854	0.874715267722309	0.874384216064493	0.874045488788666	0.873699093809056	0.873345039218657	0.872983333289005	0.872613984469956	0.872237001389464	0.871852392853344
0.881265316139913	0.881253553407501	0.881233949159186	0.881206503853518	0.881171218132452	0.881128092821326	0.881077128928845	0.881018327647051	0.880951690351292	0.880877218600185	0.880794914135577	0.880704778882498	0.880606814949109	0.880501024626646	0.880387410389363	0.880265974894462	0.880136720982026	0.879999651674941	0.879854770178819	0.87970207988191	0.879541584355016	0.879373287351393	0.879197192806652	0.879013304838658	0.878821627747416	0.878622166014959	0.878414924305231	0.878199907463961	0.877977120518532	0.877746568677854	0.877508257332218	0.877262192053159	0.877008378593302	0.876746822886214	0.876477531046242	0.876200509368352	0.875915764327962	0.875623302580767	0.87532313096256	0.875015256489055	0.874699686355695	0.874376427937458	0.874045488788666	0.873706876642775	0.873360599412176	0.873006665187973	0.872645082239775	0.872275859015468	0.871899004140992	0.871514526420104
0.88091641357098	0.880904654919284	0.880885057472091	0.880857621687844	0.880822348208346	0.880779237858741	0.880728291647497	0.880669510766375	0.8806028965904	0.880528450677823	0.880446174770081	0.880356070791751	0.880258140850497	0.880152387237018	0.880038812424983	0.87991741907097	0.879788210014392	0.879651188277424	0.879506357064923	0.87935371976434	0.879193279945635	0.879025041361179	0.878849007945656	0.878665183815958	0.878473573271075	0.878274180791984	0.878067011041525	0.877852068864282	0.877629359286452	0.877398887515711	0.877160658941077	0.876914679132765	0.876660953842038	0.876399489001059	0.876130290722725	0.87585336530051	0.875568719208295	0.875276359100196	0.874976291810383	0.874668524352904	0.87435306392149	0.874029917889366	0.873699093809056	0.873360599412176	0.873014442609228	0.87266063148939	0.872299174320298	0.871930079547821	0.871553355795838	0.871169011866002
0.880559795652983	0.880548041172712	0.880528450677823	0.880501024626646	0.880465763660831	0.880422668605323	0.880371740468347	0.880312980441379	0.880246389899112	0.880171970399422	0.880089723683327	0.879999651674941	0.879901756481421	0.879796040392915	0.879682505882496	0.879561155606101	0.879431992402461	0.879295019293022	0.879150239481867	0.878997656355634	0.878837273483419	0.878669094616691	0.878493123689182	0.878309364816791	0.878117822297471	0.877918500611116	0.877711404419441	0.877496538565859	0.87727390807535	0.877043518154333	0.876805374190519	0.876559481752777	0.876305846590978	0.876044474635845	0.875775371998795	0.875498544971776	0.875214000027098	0.87492174381726	0.874621783174776	0.874314125111985	0.873998776820872	0.873675745672868	0.873345039218657	0.873006665187973	0.87266063148939	0.872306946210115	0.871945617615763	0.871576654150143	0.871200064435027	0.870815857269916
0.880195470698355	0.880183720480154	0.880164137088638	0.880136720982026	0.880101472801809	0.880058393372731	0.880007483702769	0.879948744983104	0.879882178588092	0.879807786075226	0.879725569185096	0.879635529841342	0.879537670150602	0.879431992402461	0.879318499069383	0.879197192806652	0.879068076452299	0.878931153027026	0.878786425734127	0.878633897959404	0.878473573271075	0.878305455419682	0.878129548337988	0.877945856140877	0.877754383125241	0.877555133769866	0.877348112735318	0.877133324863811	0.876910775179086	0.876680468886271	0.876442411371748	0.876196608203005	0.87594306512849	0.875681788077458	0.875412783159811	0.875136056665937	0.87485161506654	0.874559465012469	0.87425961333454	0.873952067043352	0.8736368333291	0.873313919561382	0.872983333289005	0.872645082239775	0.872299174320298	0.871945617615763	0.871584420389725	0.871215591083884	0.870839138317858	0.870455070888949
0.87982344719876	0.879811701333204	0.879792125196018	0.879764719245308	0.879729484122403	0.87968642065184	0.879635529841342	0.87957681288179	0.879510271147197	0.879435906194663	0.87935371976434	0.879263713779385	0.879165890345907	0.879060251752914	0.878946800472248	0.878825539158526	0.878696470649064	0.878559597963803	0.878414924305231	0.878262453058298	0.878102187790323	0.877934132250902	0.877758290371808	0.877574666266886	0.877383264231944	0.877184088744641	0.876977144464363	0.876762436232103	0.876539969070334	0.876309748182867	0.876071778954724	0.875826066951984	0.87557261792164	0.875311437791448	0.875042532669761	0.874765908845373	0.87448157278735	0.874189531144853	0.873889790746964	0.873582358602502	0.873267241899836	0.872944448006693	0.872613984469956	0.872275859015468	0.871930079547821	0.871576654150143	0.871215591083884	0.87084689878859	0.870470585881677	0.870086661158202
0.879443733824867	0.879431992402461	0.879412423670448	0.879385028086815	0.879349806292727	0.879306759112509	0.879255887553625	0.879197192806652	0.879130676245248	0.879056339426115	0.878974184088958	0.878884212156439	0.878786425734127	0.878680827110441	0.878567418756589	0.878446203326504	0.878317183656774	0.878180362766563	0.878035743857537	0.877883330313773	0.877723125701672	0.877555133769866	0.877379358449116	0.877195803852207	0.87700447427384	0.876805374190519	0.876598508260431	0.87638388132332	0.876161498400361	0.875931364694025	0.875693485587941	0.87544786664675	0.875194513615963	0.874933432421798	0.874664629171033	0.874388110150833	0.874103881828587	0.873811950851735	0.873512324047588	0.87320500842315	0.872890011164922	0.872567339638719	0.872237001389464	0.871899004140992	0.871553355795838	0.871200064435027	0.870839138317858	0.870470585881677	0.870094415741655	0.869710636690553
0.879056339426115	0.879044602537296	0.879025041361179	0.878997656355634	0.878962448161655	0.878919417603353	0.878868565687929	0.878809893605645	0.878743402729802	0.878669094616691	0.878586971005562	0.878497033818573	0.878399285160741	0.878293727319885	0.878180362766563	0.878059194154014	0.877930224318079	0.877793456277132	0.877648893231995	0.877496538565859	0.877336395844187	0.877168468814626	0.876992761406902	0.87680927773272	0.876618022085652	0.876418998941023	0.876212212955794	0.875997668968433	0.875775371998795	0.875545327247978	0.875307540098191	0.875062016112611	0.874808761035228	0.8745477807907	0.874279081484188	0.874002669401198	0.873718551007408	0.873426732948501	0.873127222049982	0.872820025316997	0.872505149934144	0.872182603265286	0.871852392853344	0.871514526420104	0.871169011866002	0.870815857269916	0.870455070888949	0.870086661158202	0.869710636690553	0.869327006276419
0.878661273030484	0.878649540765613	0.878629987295997	0.878602613079381	0.878567418756589	0.87852440515151	0.878473573271075	0.878414924305231	0.878348459626908	0.878274180791984	0.878192089539241	0.878102187790323	0.878004477649684	0.877898961404529	0.877785641524758	0.877664520662896	0.877535601654025	0.877398887515711	0.877254381447919	0.87710208683293	0.876942007235253	0.876774146401529	0.876598508260431	0.87641509692256	0.876223916680334	0.876024972007876	0.875818267560897	0.875603808176565	0.875381598873384	0.875151644851053	0.874913951490334	0.874668524352904	0.874415369181209	0.874154491898308	0.873885898607718	0.873609595593249	0.873325589318836	0.873033886428366	0.8727344937455	0.872427418273491	0.872112667194997	0.871790247871885	0.871460167845037	0.871122434834145	0.870777056737506	0.870424041631807	0.870063397771908	0.869695133590621	0.869319257698484	0.868935778883524
0.878258543844246	0.878246816293614	0.878227270680979	0.878199907463961	0.87816472728321	0.878121730962391	0.878070919508159	0.878012294110136	0.877945856140877	0.877871607155836	0.87778954889332	0.877699683274449	0.877602012403102	0.877496538565859	0.877383264231944	0.877262192053159	0.877133324863811	0.87699666568064	0.876852217702736	0.876699984311456	0.876539969070334	0.876372175724984	0.876196608203005	0.876013270613871	0.875822167248826	0.875623302580767	0.875416681264126	0.875202308134748	0.874980188209758	0.87475032668743	0.874512728947047	0.87426740054876	0.874014347233436	0.873753574922507	0.87348508971781	0.873208897901426	0.872925005935512	0.872633420462123	0.872334148303042	0.872027196459589	0.871712572112442	0.871390282621435	0.871060335525368	0.870722738541799	0.870377499566842	0.870024626674947	0.869664128118692	0.869296012328551	0.868920287912675	0.868536963656653
0.877848161251722	0.877836438505543	0.877816900900245	0.87778954889332	0.877754383125241	0.877711404419441	0.877660613782298	0.877602012403102	0.877535601654025	0.877461383090088	0.877379358449116	0.877289529651691	0.877191898801108	0.877086468183309	0.876973240266831	0.876852217702736	0.876723403324541	0.876586800148146	0.876442411371748	0.876290240375761	0.876130290722724	0.875962566157208	0.875787070605712	0.875603808176565	0.875412783159811	0.875214000027098	0.875007463431556	0.874793178207677	0.874571149371183	0.874341382118894	0.874103881828587	0.873858654058853	0.873605704548953	0.873345039218657	0.873076664168092	0.872800585677577	0.872516810207451	0.872225344397906	0.871926195068808	0.871619369219508	0.871304874028661	0.870982716854033	0.870652905232299	0.870315446878842	0.869970349687548	0.869617621730591	0.869257271258217	0.868889306698519	0.868513736657214	0.868130569917407
0.877430134815033	0.877418416963444	0.877398887515711	0.877371546929195	0.877336395844187	0.877293435083888	0.877242665654388	0.877184088744641	0.877117705726429	0.877043518154333	0.876961527765682	0.876871736480516	0.876774146401529	0.876668759814017	0.876555579185815	0.876434607167231	0.876305846590978	0.876169300472097	0.876024972007876	0.87587286457777	0.875712981743302	0.875545327247978	0.87536990501718	0.875186719158067	0.874995773959462	0.874797073891737	0.874590623606698	0.874376427937458	0.874154491898308	0.873924820684585	0.873687419672531	0.87344229441915	0.873189450662064	0.87292889431935	0.87266063148939	0.872384668450707	0.872101011661792	0.871809667760934	0.871510643566045	0.87120394607447	0.870889582462805	0.870567560086704	0.870237886480677	0.869900569357891	0.869555616609963	0.869203036306745	0.868842836696106	0.868475026203715	0.868099613432804	0.867716607163948
0.87700447427384	0.876992761406902	0.876973240266831	0.876945911310857	0.876910775179086	0.87686783269448	0.876817084862839	0.876758532872773	0.876692178095667	0.876618022085652	0.876536066579555	0.87644631349686	0.876348764939653	0.876243423192568	0.876130290722725	0.876009370179665	0.875880664395281	0.875744176383741	0.875599909341406	0.87544786664675	0.875288051860267	0.875120468724374	0.874945121163316	0.87476201328306	0.874571149371183	0.874372533896761	0.874166171510248	0.873952067043352	0.873730225508907	0.873500652100739	0.873263352193526	0.873018331342655	0.872765595284076	0.872505149934144	0.872237001389464	0.871961155926726	0.871677620002539	0.871386400253254	0.871087503494791	0.870780936722452	0.870466707110735	0.870144822013141	0.869815288961977	0.869478115668152	0.869133310020968	0.868780880087911	0.868420834114434	0.868053180523728	0.867677927916503	0.867295085070748
0.876571189545085	0.876559481752777	0.876539969070334	0.87651265195485	0.876477531046242	0.876434607167231	0.87638388132332	0.876325354702768	0.876259028676558	0.876184904798361	0.876102984804493	0.876013270613871	0.875915764327962	0.875810468230727	0.875697384788557	0.875576516650213	0.87544786664675	0.875311437791448	0.875167233279724	0.875015256489055	0.874855510978882	0.874688000490518	0.874512728947047	0.874329700453223	0.874138919295354	0.873940389941194	0.873734117039822	0.873520105421514	0.873298360097621	0.873068886260429	0.872831689283024	0.872586774719146	0.872334148303042	0.872073815949312	0.87180578375275	0.871530057988183	0.871246645110299	0.870955551753479	0.870656784731612	0.870350351037919	0.870036257844761	0.869714512503449	0.869385122544043	0.86904809567515	0.868703439783719	0.868351162934827	0.86799127337146	0.867623779514293	0.867248689961459	0.86686601348832
0.876130290722725	0.876118588094946	0.87609908401996	0.876071778954724	0.876036673538963	0.875993768595151	0.87594306512849	0.875884564326882	0.875818267560897	0.875744176383741	0.875662292531208	0.87557261792164	0.875475154655873	0.87536990501718	0.875256871471214	0.875136056665937	0.875007463431556	0.874871094780443	0.874726953907055	0.874575044187854	0.874415369181209	0.874247932627307	0.874072738448054	0.873889790746964	0.873699093809056	0.873500652100739	0.873294470269688	0.873080553144725	0.872858905735688	0.872629533233298	0.872392441009016	0.872147634614908	0.871895119783486	0.871634902427564	0.871366988640092	0.871091384693999	0.870808097042019	0.870517132316523	0.870218497329336	0.86991219907156	0.869598244713379	0.869276641603872	0.868947397270814	0.868610519420469	0.86826601593739	0.867913894884197	0.867554164501369	0.867186833207015	0.866811909596649	0.866429402442955
0.875681788077458	0.875670090704025	0.875650595386189	0.875623302580767	0.875588212927289	0.875545327247978	0.875494646547728	0.875436172014078	0.87536990501718	0.875295847109765	0.875214000027098	0.875124365686932	0.875026946189461	0.87492174381726	0.874808761035228	0.874688000490518	0.874559465012469	0.874423157612532	0.874279081484188	0.874127240002861	0.873967636725833	0.873800275392144	0.873625159922497	0.87344229441915	0.873251683165808	0.873053330627508	0.8728472414505	0.872633420462123	0.872411872670676	0.872182603265286	0.871945617615763	0.871700921272465	0.871448519966141	0.871188419607786	0.870920626288473	0.870645146279199	0.870361986030709	0.870071152173329	0.869772651516783	0.869466491050013	0.869152677940991	0.868831219536525	0.86850212336206	0.868165397121479	0.86782104869689	0.86746908614842	0.867109517713993	0.866742351809105	0.866367597026603	0.865985262136449
0.875225692056453	0.875214000027098	0.875194513615963	0.875167233279724	0.875132159657713	0.875089293571896	0.875038636026854	0.874980188209758	0.874913951490334	0.874839927420828	0.874758117735965	0.874668524352904	0.874571149371183	0.874465995072669	0.87435306392149	0.874232358563976	0.874103881828587	0.873967636725833	0.8738236264482	0.873671854370061	0.873512324047588	0.873345039218657	0.873170003802746	0.872987221900833	0.872796697795286	0.872598435949748	0.872392441009016	0.872178717798923	0.871957271326202	0.871728106778355	0.871491229523514	0.871246645110299	0.870994359267666	0.870734377904756	0.870466707110735	0.870191353154632	0.869908322485169	0.869617621730591	0.869319257698484	0.869013237375594	0.868699567927639	0.868378256699116	0.868049311213102	0.867712739171054	0.867368548452597	0.867016747115316	0.866657343394535	0.866290345703095	0.865915762631129	0.865533602945826
0.87476201328306	0.87475032668743	0.874730849332406	0.874703581674522	0.874668524352904	0.87462567818926	0.874575044187854	0.874516623535479	0.874450417601429	0.874376427937458	0.874294656277742	0.874205104538833	0.874107774819604	0.874002669401198	0.873889790746964	0.873769141502393	0.873640724495047	0.873504542734484	0.873360599412176	0.873208897901426	0.873049441757279	0.872882234716423	0.872707280697092	0.872524583798962	0.872334148303042	0.872135978671554	0.871930079547821	0.87171645575614	0.871495112301652	0.871266054370208	0.871029287328231	0.870784816722574	0.870532648280367	0.870272787908867	0.870005241695299	0.869730015906691	0.869447116989707	0.869156551570475	0.868858326454405	0.868552448626009	0.868238925248714	0.867917763664664	0.867588971394529	0.867252556137297	0.866908525770067	0.866556888347838	0.86619765210329	0.865830825446564	0.865456416965029	0.865074435423055
0.874290762556534	0.874279081484188	0.87425961333454	0.874232358563976	0.874197317811418	0.874154491898308	0.874103881828587	0.874045488788666	0.873979314147397	0.873905359456036	0.8738236264482	0.873734117039822	0.8736368333291	0.873531777596442	0.873418952304403	0.873298360097621	0.873170003802746	0.873033886428366	0.872890011164922	0.872738381384632	0.872579000641389	0.872411872670676	0.872237001389464	0.872054390896103	0.871864045470217	0.871665969572588	0.871460167845037	0.871246645110299	0.871025406371896	0.870796456814001	0.870559801801298	0.870315446878842	0.870063397771908	0.869803660385837	0.869536240805878	0.869261145297026	0.868978380303852	0.868687952450328	0.868389868539655	0.868084135554071	0.867770760654673	0.867449751181214	0.867121114651913	0.866784858763249	0.866440991389752	0.866089520583791	0.865730454575358	0.865363801771845	0.864989570757813	0.864607770294765
0.873811950851735	0.873800275392144	0.873780816596989	0.873753574922507	0.873718551007408	0.873675745672868	0.873625159922497	0.87356679494232	0.873500652100739	0.873426732948501	0.873345039218657	0.873255572826512	0.873158335869575	0.873053330627508	0.872940559562058	0.872820025316997	0.872691730718046	0.872555678772807	0.872411872670676	0.872260315782761	0.872101011661792	0.871933964042024	0.871759176839139	0.871576654150144	0.871386400253254	0.871188419607786	0.870982716854033	0.870769296813145	0.870548164486996	0.870319325058051	0.87008278388923	0.869838546523758	0.869586618685023	0.869327006276419	0.869059715381187	0.868784752262254	0.86850212336206	0.868211835302392	0.867913894884197	0.867608309087408	0.867295085070748	0.866974230171542	0.866645751905517	0.866309657966599	0.865965956226707	0.865614654735537	0.865255761720348	0.864889285585736	0.864515234913408	0.864133618461951
0.873325589318836	0.873313919561382	0.873294470269688	0.873267241899836	0.873232235090328	0.873189450662064	0.87313888961832	0.873080553144725	0.873014442609228	0.872940559562058	0.872858905735688	0.872769483044786	0.872672293586163	0.872567339638719	0.872454623663382	0.872334148303042	0.872205916382478	0.87206993090829	0.871926195068808	0.871774712234016	0.871615485955457	0.871448519966141	0.871273818180443	0.871091384693999	0.870901223783596	0.870703339907059	0.870497737703131	0.870284421991347	0.870063397771908	0.869834670225544	0.869598244713379	0.86935412677678	0.869102322137218	0.868842836696106	0.868575676534645	0.868300847913657	0.868018357273422	0.8677282112335	0.867430416592552	0.867124980328164	0.866811909596649	0.866491211732861	0.866162894249996	0.865826964839385	0.865483431370293	0.865132301889699	0.864773584622083	0.864407287969201	0.864033420509859	0.863651990999678
0.872831689283024	0.872820025316997	0.872800585677577	0.872773370820694	0.872738381384632	0.872695618190013	0.872645082239775	0.872586774719146	0.872520696995609	0.872446850618872	0.872365237320818	0.872275859015468	0.872178717798923	0.872073815949312	0.871961155926726	0.871840740373162	0.871712572112442	0.871576654150143	0.871432989673518	0.871281582051406	0.871122434834145	0.870955551753479	0.870780936722452	0.87059859383531	0.870408527367388	0.870210741774996	0.870005241695299	0.869792031946194	0.869571117526181	0.869342503614227	0.86910619556963	0.868862198931871	0.868610519420469	0.868351162934827	0.868084135554071	0.867809443536889	0.867527093321359	0.867237091524782	0.866939444943496	0.866634160552699	0.866321245506259	0.866000707136518	0.865672552954098	0.865336790647696	0.864993428083877	0.86464247330686	0.864283934538301	0.863917820177072	0.863544138799027	0.863162899156778
0.872330262244188	0.872318604158784	0.872299174320298	0.872271973184503	0.872237001389464	0.87219425975552	0.872143749285266	0.872085471163518	0.872019426757293	0.871945617615763	0.871864045470217	0.871774712234016	0.871677620002539	0.87157277105313	0.871460167845037	0.871339813019343	0.871211709398898	0.871075859988245	0.870932267973537	0.870780936722452	0.870621869784104	0.870455070888949	0.870280543948682	0.870098293056136	0.869908322485169	0.869710636690553	0.86950524030785	0.869292138153293	0.869071335223653	0.868842836696106	0.868606647928096	0.868362774457186	0.868111222000915	0.867851996456641	0.867585103901383	0.86731055059166	0.867028342963316	0.866738487631353	0.866440991389752	0.866135861211284	0.865823104247332	0.865502727827686	0.865174739460355	0.864839146831358	0.864495957804519	0.864145180421252	0.863786822900345	0.863420893637736	0.863047401206285	0.862666354355544
0.871821319876613	0.871809667760934	0.871790247871885	0.871763060665078	0.871728106778355	0.871685387031769	0.871634902427564	0.871576654150143	0.871510643566045	0.871436872223899	0.871355341854389	0.871266054370208	0.871169011866002	0.871064216618318	0.870951671085542	0.870831377907835	0.870703339907059	0.870567560086704	0.870424041631807	0.870272787908867	0.870113802465755	0.869947089031619	0.869772651516783	0.869590494012644	0.869400620791562	0.869203036306745	0.868997745192128	0.868784752262254	0.868564062512136	0.868335681117134	0.868099613432804	0.867855864994766	0.867604441518546	0.867345348899424	0.867078593212282	0.866804180711431	0.866522117830449	0.866232411182004	0.865935067557679	0.865630093927786	0.865317497441177	0.864997285425056	0.864669465384774	0.864334045003632	0.863991032142668	0.863640434840449	0.863282261312849	0.862916519952827	0.862543219330202	0.862162368191417
0.871304874028661	0.871293227971714	0.871273818180443	0.871246645110299	0.871211709398898	0.871169011866002	0.871118553513497	0.871060335525368	0.870994359267666	0.870920626288473	0.870839138317858	0.870749897267832	0.870652905232299	0.870548164486996	0.870435677489437	0.870315446878842	0.870187475476071	0.870051766283545	0.869908322485169	0.869757147446244	0.869598244713379	0.869431618014392	0.869257271258217	0.869075208534793	0.868885434114956	0.868687952450328	0.868482768173193	0.868269886096373	0.868049311213102	0.86782104869689	0.867585103901383	0.867341482360222	0.867090189786888	0.866831232074557	0.866564615295935	0.866290345703095	0.866008429727311	0.865718873978883	0.865421685246959	0.86511687049935	0.864804436882345	0.864484391720515	0.864156742516516	0.863821496950887	0.86347866288184	0.863128248345047	0.862770261553425	0.862404710896909	0.862031604942227	0.861650952432668
0.870780936722452	0.870769296813145	0.870749897267832	0.870722738541799	0.870687821272433	0.870645146279199	0.870594714563623	0.870536527309263	0.870470585881677	0.870396891828388	0.870315446878842	0.87022625294436	0.870129312118089	0.870024626674947	0.869912199071559	0.869792031946194	0.869664128118692	0.86952849059039	0.869385122544043	0.869234027343735	0.869075208534793	0.868908669843688	0.868734415177941	0.868552448626009	0.868362774457186	0.868165397121479	0.867960321249495	0.867747551652313	0.867527093321359	0.867298951428266	0.867063131324738	0.866819638542407	0.866568478792683	0.866309657966599	0.866043182134656	0.865769057546655	0.86548729063153	0.865197887997175	0.864900856430268	0.864596202896082	0.864283934538301	0.863964058678826	0.863636582817576	0.863301514632285	0.862958861978296	0.862608632888343	0.862250835572339	0.861885478417151	0.861512569986369	0.861132119020077
0.870249520153533	0.870237886480677	0.870218497329336	0.870191353154632	0.870156454593716	0.870113802465755	0.870063397771908	0.870005241695299	0.869939335600986	0.869865681035926	0.869784279728931	0.869695133590621	0.869598244713379	0.869493615371286	0.869381248020068	0.869261145297026	0.869133310020968	0.868997745192128	0.868854453992095	0.868703439783719	0.868544706111025	0.868378256699116	0.868204095454077	0.868022226462865	0.867832653993203	0.867635382493464	0.867430416592552	0.867217761099778	0.866997421004727	0.86676940147713	0.866533707866722	0.866290345703095	0.866039320695555	0.865780638732962	0.865514305883577	0.865240328394895	0.864958712693477	0.864669465384774	0.864372593252956	0.86406810326072	0.863756002549106	0.863436298437305	0.863108998422457	0.862774110179451	0.862431641560716	0.862081600596006	0.861723995492185	0.861358834633002	0.860986126578866	0.860605880066608
0.869710636690553	0.869699009342856	0.869679630733335	0.869652501316942	0.869617621730591	0.869574992793145	0.869524615505391	0.869466491050013	0.869400620791562	0.869327006276419	0.869245649232753	0.869156551570475	0.869059715381187	0.868955142938127	0.868842836696106	0.868722799291444	0.868595033541898	0.868459542446588	0.868316329185916	0.868165397121479	0.868006749795981	0.86784039093314	0.867666324437582	0.867484554394741	0.867295085070748	0.867097920912316	0.86689306654662	0.866680526781175	0.866460306603703	0.866232411182004	0.865996845863811	0.865753616176649	0.865502727827686	0.865244186703581	0.864977998870319	0.864704170573055	0.86442270823594	0.864133618461951	0.863836908032709	0.863532583908298	0.863220653227075	0.862901123305481	0.862574001637836	0.862239295896141	0.861897013929868	0.861547163765747	0.861189753607548	0.860824791835859	0.860452287007855	0.860072247857069
0.869164298874921	0.869152677940991	0.869133310020968	0.86910619556963	0.869071335223653	0.869028729801591	0.868978380303852	0.868920287912675	0.868854453992095	0.868780880087911	0.868699567927639	0.868610519420469	0.868513736657214	0.868409221910253	0.86829697763347	0.868177006462188	0.868049311213102	0.867913894884197	0.867770760654673	0.867619911884856	0.867461352116112	0.867295085070748	0.867121114651913	0.866939444943496	0.866750080210011	0.866553024896488	0.866348283628348	0.866135861211284	0.865915762631129	0.86568799305372	0.865452557824761	0.86520946246968	0.864958712693477	0.864700314380573	0.864434273594649	0.864160596578485	0.863879289753787	0.863590359721018	0.863293813259217	0.862989657325815	0.862677899056448	0.862358545764766	0.862031604942227	0.861697084257904	0.861354991558269	0.861005334866982	0.860648122384675	0.860283362488727	0.859911063733035	0.859531234847785
0.868610519420469	0.86859890498881	0.868579547905788	0.868552448626009	0.868517607785905	0.868475026203715	0.868424704879465	0.868366644994941	0.868300847913657	0.868227315180819	0.868146048523281	0.868057049849502	0.867960321249495	0.867855864994766	0.867743683538261	0.867623779514293	0.867496155738474	0.867360815207643	0.867217761099778	0.867066996773917	0.866908525770067	0.866742351809105	0.866568478792683	0.866386910803119	0.86619765210329	0.866000707136518	0.865796080526445	0.865583777076916	0.865363801771845	0.86513615977508	0.864900856430268	0.864657897260708	0.864407287969201	0.8641490344379	0.863883142728146	0.86360961908031	0.863328469913618	0.863039701825985	0.862743321593828	0.862439336171889	0.862127752693043	0.861808578468108	0.861481820985642	0.861147487911744	0.860805587089843	0.860456126540488	0.860099114461125	0.859734559225879	0.859362469385323	0.858982853666246
0.868049311213102	0.868037703372113	0.868018357273422	0.86799127337146	0.867956452302411	0.867913894884197	0.867863602116455	0.867805575180513	0.867739815439353	0.867666324437582	0.867585103901383	0.867496155738474	0.867399482038054	0.867295085070748	0.867182967288546	0.867063131324738	0.86693557999384	0.866800316291525	0.866657343394535	0.8665066646606	0.866348283628348	0.866182204017208	0.866008429727311	0.865826964839385	0.865637813614646	0.86544098049468	0.865236470101329	0.865024287236561	0.864804436882345	0.864576924200513	0.864341754532623	0.864098933399817	0.863848466502665	0.863590359721018	0.863324619113847	0.863051250919079	0.862770261553425	0.862481657612213	0.862185445869204	0.861881633276412	0.861570226963911	0.861251234239647	0.860924662589237	0.860590519675765	0.860248813339573	0.859899551598054	0.859542742645425	0.85917839485251	0.858806516766508	0.858427117110766
0.867480687310448	0.86746908614842	0.867449751181214	0.867422682863079	0.867387881829949	0.867345348899424	0.867295085070748	0.867237091524782	0.867171369623972	0.867097920912316	0.867016747115316	0.866927850139938	0.866831232074557	0.866726895188904	0.866614841934001	0.866495074942098	0.866367597026603	0.866232411182004	0.866089520583791	0.865938928588367	0.865780638732962	0.865614654735537	0.86544098049468	0.865259620089507	0.865070577779548	0.864873858004633	0.864669465384774	0.86445740472004	0.864237680990424	0.864010299355716	0.863775265155357	0.863532583908298	0.863282261312849	0.863024303246528	0.862758715765901	0.862485505106415	0.862204677682234	0.861916240086062	0.861620199088967	0.861316561640195	0.861005334866982	0.860686526074362	0.860360142744968	0.860026192538826	0.859684683293152	0.859335623022135	0.858979019916718	0.858614882344379	0.858243218848897	0.857864038150126
0.866904660941501	0.86689306654662	0.86687374285787	0.866846690329319	0.866811909596649	0.86676940147713	0.866719166969609	0.866661207254474	0.866595523693628	0.866522117830449	0.866440991389752	0.866352146277738	0.86625558458195	0.866151308571208	0.866039320695555	0.865919623586188	0.865792220055388	0.865657113096445	0.865514305883577	0.865363801771845	0.86520560429706	0.865039717175693	0.86486614430477	0.864684889761772	0.864495957804519	0.864299352871062	0.864095079579557	0.863883142728146	0.863663547294824	0.863436298437305	0.863201401492885	0.862958861978296	0.862708685589555	0.862450878201816	0.862185445869204	0.861912394824657	0.861631731479751	0.861343462424535	0.861047594427342	0.860744134434615	0.86043308957071	0.860114467137712	0.859788274615225	0.85945451966018	0.85911321010662	0.858764353965486	0.858407959424403	0.858044034847456	0.857672588774958	0.857293629923221
0.866321245506259	0.866309657966599	0.866290345703095	0.866263309169632	0.866228549001632	0.866186066016036	0.866135861211284	0.866077935767289	0.866012291045398	0.865938928588367	0.865857850120309	0.865769057546655	0.865672552954098	0.86556833861054	0.865456416965029	0.865336790647696	0.86520946246968	0.865074435423055	0.864931712680751	0.864781297596466	0.864623193704575	0.86445740472004	0.864283934538301	0.864102787235183	0.863913967066773	0.863717478469317	0.863513326059092	0.863301514632285	0.863082049164865	0.862854934812445	0.862620176910144	0.862377780972445	0.862127752693043	0.861870097944692	0.861604822779047	0.861331933426497	0.861051436296001	0.860763337974911	0.860467645228794	0.860164365001246	0.859853504413709	0.859535070765273	0.859209071532479	0.858875514369114	0.858534407106005	0.858185757750806	0.857829574487776	0.85746586567756	0.857094639856958	0.856715905738693
0.865730454575358	0.865718873978883	0.86569957328723	0.865672552954098	0.865637813614646	0.865595356085482	0.865545181364634	0.86548729063153	0.865421685246959	0.865348366753041	0.865267336873183	0.86517859751203	0.865082150755419	0.864977998870319	0.86486614430477	0.864746589687821	0.864619337829455	0.864484391720515	0.864341754532623	0.864191429618098	0.864033420509859	0.863867730921336	0.863694364746366	0.863513326059092	0.863324619113847	0.863128248345047	0.862924218367064	0.862712533974106	0.862493200140087	0.862266222018489	0.862031604942227	0.861789354423505	0.861539476153663	0.861281976003024	0.861016860020738	0.860744134434615	0.860463805650957	0.860175880254386	0.859880365007661	0.8595772668515	0.859266592904385	0.858948350462376	0.858622546998904	0.858289190164574	0.857948287786956	0.857599847870367	0.857243878595658	0.856880388319987	0.856509385576594	0.856130879074563
0.865132301889699	0.865120728324261	0.865101439350877	0.865074435423055	0.865039717175693	0.864997285425056	0.864947141168759	0.864889285585736	0.864823720036211	0.864750446061661	0.864669465384774	0.864580779909403	0.864484391720515	0.864380303084132	0.864268516447277	0.8641490344379	0.864021859864812	0.863886995717609	0.863744445166591	0.863594211562674	0.863436298437305	0.863270709502362	0.863097448650056	0.862916519952827	0.862727927663231	0.862531676213827	0.862327770217059	0.862116214465129	0.861897013929868	0.861670173762601	0.861435699294009	0.861193596033984	0.860943869671482	0.860686526074362	0.860421571289237	0.860149011541302	0.859868853234168	0.85958110294969	0.859285767447783	0.858982853666246	0.858672368720565	0.858354319903726	0.858028714686012	0.857695560714804	0.857354865814368	0.857006637985643	0.856650885406025	0.85628761642914	0.85591683958462	0.855538563577864
0.864526801360072	0.864515234913408	0.864495957804519	0.864468970486723	0.864434273594649	0.864391867944218	0.864341754532623	0.864283934538301	0.864218409320902	0.864145180421252	0.864064249561311	0.863975618644127	0.863879289753787	0.863775265155357	0.863663547294824	0.863544138799027	0.863417042475592	0.863282261312849	0.863139798479756	0.862989657325815	0.862831841380975	0.862666354355544	0.862493200140087	0.862312382805316	0.862123906601986	0.86192777596078	0.861723995492185	0.861512569986369	0.861293504413055	0.861066803921382	0.860832473839768	0.860590519675765	0.860340947115908	0.860083762025566	0.859818970448777	0.859546578608089	0.859266592904385	0.858979019916718	0.858683866402123	0.858381139295438	0.858070845709117	0.857752992933031	0.857427588434274	0.857094639856958	0.856754155022004	0.85640614192693	0.856050608745629	0.855687563828151	0.85531701570047	0.854938973064254
0.863913967066773	0.863902407826505	0.863883142728146	0.863856172224821	0.863821496950887	0.863779117721917	0.863729035534676	0.863671251567097	0.863605767178249	0.863532583908298	0.863451703478467	0.86336312779099	0.863266858929062	0.863162899156778	0.863051250919079	0.862931916841678	0.862804899730997	0.862670202574088	0.862527828538549	0.862377780972445	0.862220063404214	0.862054679542572	0.861881633276412	0.861700928674701	0.861512569986369	0.861316561640195	0.861112908244686	0.860901614587951	0.860682685637577	0.860456126540488	0.860221942622808	0.859980139389719	0.859730722525308	0.859473697892417	0.859209071532479	0.858936849665357	0.858657038689175	0.858369645180143	0.858074675892381	0.857772137757731	0.857462037885569	0.857144383562616	0.856819182252733	0.856486441596722	0.856146169412116	0.855798373692965	0.855443062609617	0.855080244508497	0.854709927911877	0.854332121517641
0.863293813259217	0.863282261312849	0.86326300837086	0.863236054886178	0.863201401492885	0.8631590490062	0.863108998422457	0.863051250919079	0.862985807854543	0.86291267076835	0.862831841380975	0.862743321593828	0.862647113489199	0.862543219330202	0.862431641560716	0.862312382805316	0.862185445869204	0.862050833738136	0.861908549578334	0.86175859673641	0.861600978739267	0.861435699294009	0.861262762287839	0.861082171787955	0.860893932041438	0.86069804747514	0.860494522695561	0.860283362488727	0.860064571820058	0.859838155834236	0.859604119855065	0.859362469385323	0.85911321010662	0.858856347879235	0.858591888741965	0.858319838911955	0.858040204784532	0.857752992933031	0.857458210108614	0.85715586324009	0.856845959433722	0.856528505973036	0.856203510318621	0.855870980107926	0.855530923155051	0.855183347450537	0.854828261161139	0.854465672629612	0.854095590374478	0.853718023089789
0.862666354355544	0.862654809790463	0.862635569150486	0.862608632888343	0.862574001637836	0.862531676213827	0.862481657612213	0.862423947009898	0.862358545764766	0.862285455415637	0.862204677682234	0.862116214465129	0.862020067845699	0.861916240086062	0.861804733629023	0.861685551098002	0.86155869529697	0.861424169210367	0.861281976003024	0.861132119020077	0.86097460178688	0.860809428008903	0.860636601571637	0.860456126540488	0.860268007160665	0.860072247857069	0.859868853234168	0.859657828075877	0.859439177345424	0.859212906185221	0.858979019916718	0.858737524040264	0.858488424234956	0.858231726358482	0.857967436446967	0.857695560714804	0.857416105554489	0.857129077536442	0.856834483408836	0.856532330097403	0.856222624705255	0.855905374512683	0.855580586976962	0.855248269732147	0.854908430588863	0.854561077534094	0.854206218730959	0.853843862518496	0.853474017411427	0.85309669209993
0.862031604942227	0.862020067845699	0.862000839653176	0.861973920817186	0.86193931197125	0.861897013929868	0.861847027688492	0.861789354423505	0.861723995492185	0.861650952432668	0.861570226963911	0.861481820985642	0.861385736578308	0.861281976003024	0.861170541701504	0.861051436296001	0.860924662589237	0.860790223564321	0.860648122384675	0.860498362393944	0.860340947115908	0.860175880254386	0.860003165693135	0.859822807495746	0.859634809905535	0.859439177345424	0.859235914417827	0.859025025904518	0.858806516766508	0.858580392143909	0.858346657355791	0.858105317900041	0.857856379453211	0.857599847870367	0.857335729184928	0.857064029608502	0.856784755530715	0.856497913519041	0.856203510318621	0.855901552852076	0.855592048219325	0.855275003697386	0.854950426740177	0.854618324978317	0.854278706218912	0.853931578445344	0.853576949817053	0.853214828669311	0.852845223512997	0.85246814303436
0.861389579773663	0.861378050232832	0.861358834633002	0.861331933426497	0.861297347246553	0.861255076907301	0.861205123403748	0.861147487911744	0.861082171787955	0.861009176569827	0.86092850397554	0.860840155903966	0.860744134434615	0.86064044182758	0.860529080523475	0.860410053143373	0.860283362488727	0.860149011541302	0.860007003463092	0.859857341596232	0.85970002946291	0.859535070765273	0.859362469385323	0.859182229384815	0.858994355005144	0.858798850667233	0.858595720971413	0.858384970697295	0.858166604803644	0.857940628428241	0.857707046887749	0.85746586567756	0.857217090471654	0.856960727122441	0.856696781660599	0.856425260294916	0.856146169412116	0.855859515576688	0.855565305530703	0.855263546193636	0.854954244662171	0.854637408210011	0.85431304428768	0.853981160522315	0.85364176471746	0.853294864852853	0.852940469084207	0.852578585742984	0.85220922333617	0.851832390546039
0.860740293771769	0.860728771873656	0.860709569011553	0.860682685637577	0.860648122384675	0.860605880066608	0.860555959677926	0.860498362393944	0.86043308957071	0.860360142744968	0.860279523634112	0.860191234136149	0.860095276329639	0.859991652473643	0.859880365007661	0.859761416551567	0.859634809905535	0.859500548049968	0.859358634145413	0.859209071532479	0.859051863731742	0.858887014443655	0.858714527548444	0.858534407106005	0.858346657355791	0.858151282716701	0.857948287786956	0.857737677343978	0.857519456344258	0.857293629923221	0.857060203395089	0.856819182252733	0.856570572167526	0.856314378989189	0.856050608745629	0.855779267642779	0.855500362064424	0.85521389857203	0.854919883904566	0.854618324978317	0.854309228886696	0.853992602900051	0.853668454465467	0.853336791206559	0.852997620923266	0.852650951591637	0.852296791363611	0.851935148566796	0.851566031704236	0.851189449454181
0.860083762025566	0.860072247857069	0.86005305787752	0.860026192538826	0.859991652473643	0.859949438495355	0.859899551598054	0.859841992956512	0.85977676392615	0.859703866043	0.859623301023665	0.859535070765273	0.859439177345424	0.859335623022135	0.859224410233776	0.859105541599011	0.858979019916718	0.858844848165921	0.858703029505703	0.858553567275128	0.858396464993142	0.858231726358482	0.858059355249578	0.857879355724444	0.857691732020567	0.857496488554796	0.857293629923221	0.857083160901046	0.85686508644246	0.856639411680504	0.85640614192693	0.856165282672056	0.85591683958462	0.855660818511618	0.855397225478156	0.855126066687273	0.854847348519783	0.854561077534094	0.854267260466031	0.853965904228653	0.853657015912062	0.853340602783211	0.853016672285705	0.852685232039594	0.852346289841168	0.851999853662744	0.851645931652442	0.851284532133965	0.850915663606373	0.850539334743842
0.859419999790766	0.859408493438656	0.859389316486276	0.859362469385323	0.859327952768158	0.859285767447783	0.859235914417827	0.85917839485251	0.85911321010662	0.859040361715471	0.858959851394863	0.858871681041036	0.858775852730616	0.858672368720565	0.858561231448112	0.858442443530692	0.858316007765874	0.858181927131286	0.858040204784532	0.857890844063108	0.857733848484313	0.857569221745149	0.857396967722227	0.857217090471654	0.857029594228932	0.856834483408836	0.856631762605294	0.856421436591269	0.856203510318621	0.855977988917977	0.855744877698591	0.855504182148198	0.855255907932866	0.855000060896839	0.854736647062382	0.854465672629612	0.854187143976333	0.853901067657859	0.853607450406834	0.853306299133052	0.852997620923266	0.852681423040992	0.852357712926312	0.852026498195672	0.851687786641669	0.851341586232841	0.850987905113444	0.850626751603234	0.850258134197232	0.849882061565497
0.858749022489345	0.858737524040264	0.858718360259457	0.858691531598407	0.858657038689175	0.858614882344379	0.858565063557175	0.858507583501231	0.858442443530692	0.858369645180143	0.858289190164574	0.858201080379325	0.858105317900041	0.85800190498261	0.857890844063108	0.857772137757731	0.85764578886272	0.857511800354291	0.85737017538855	0.857220917301411	0.857064029608502	0.856899516005071	0.856727380365888	0.856547626745134	0.856360259376298	0.856165282672056	0.855962701224155	0.855752519803284	0.85553474335895	0.855309377019337	0.85507642609117	0.854835896059572	0.854587792587909	0.854332121517641	0.854068888868158	0.853798100836621	0.853519763797787	0.85323388430384	0.852940469084207	0.852639525045379	0.852331059270718	0.852015079020264	0.851691591730536	0.85136060501433	0.851022126660509	0.850676164633785	0.850322727074509	0.849961822298438	0.849593458796513	0.849217645234622
0.858070845709117	0.858059355249578	0.858040204784532	0.858013394765244	0.857978925823472	0.857936798771446	0.857887014601846	0.857829574487776	0.857764479782733	0.857691732020567	0.857611332915444	0.857523284361797	0.857427588434274	0.857324247387683	0.857213263656931	0.857094639856958	0.856968378782664	0.856834483408836	0.856692956890065	0.856543802560662	0.856387023934568	0.856222624705255	0.856050608745629	0.855870980107926	0.855683743023595	0.855488901903192	0.855286461336252	0.85507642609117	0.854858801115068	0.854633591533661	0.854400802651115	0.854160439949909	0.853912509090678	0.853657015912062	0.853393966430547	0.853123366840299	0.852845223512997	0.852559542997656	0.852266332020449	0.851965597484523	0.851657346469813	0.851341586232841	0.851018324206522	0.850687567999959	0.850349325398236	0.8500036043622	0.849650413028244	0.849289759708085	0.848921652888533	0.848546101231258
0.857385485203296	0.857374002819684	0.857354865814368	0.857328074638397	0.857293629923221	0.857251532480677	0.857201783302964	0.857144383562616	0.857079334612473	0.857006637985643	0.856926295395459	0.856838308735435	0.856742680079212	0.856639411680504	0.856528505973036	0.856409965570477	0.856283793266371	0.85614999203406	0.856008565026602	0.855859515576688	0.855702847196549	0.855538563577864	0.855366668591654	0.855187166288181	0.855000060896839	0.854805356826034	0.854603058663068	0.85439317117401	0.854175699303573	0.853950648174973	0.853718023089789	0.853477829527825	0.853230073146952	0.85297475978296	0.852711895449395	0.852441486337396	0.852163538815526	0.851878059429596	0.851585054902487	0.851284532133965	0.850976498200496	0.850660960355044	0.850337926026879	0.85000740282137	0.849669398519777	0.849323921079035	0.848970978631538	0.848610579484914	0.848242732121795	0.847867445199584
0.856692956890065	0.856681482668629	0.856662359266794	0.856635587135385	0.856601166905545	0.856559099388711	0.856509385576594	0.856452026641154	0.856387023934568	0.856314378989189	0.856234093517511	0.856146169412116	0.856050608745629	0.855947413770657	0.855836586919727	0.855718130805227	0.855592048219325	0.855458342133904	0.85531701570047	0.855168072250077	0.855011515293227	0.854847348519783	0.85467557579886	0.854496201178728	0.854309228886696	0.854114663328999	0.853912509090678	0.853702770935454	0.853485453805601	0.853260562821805	0.853028103283032	0.852788080666379	0.852540500626923	0.852285368997569	0.852022691788891	0.851752475188967	0.851474725563206	0.851189449454181	0.850896653581442	0.850596344841337	0.850288530306822	0.849973217227263	0.849650413028244	0.849320125311356	0.848982361853992	0.848637130609131	0.848284439705123	0.847924297445458	0.847556712308544	0.847181692947469
0.855993276852125	0.855981810878983	0.855962701224155	0.855935948338243	0.855901552852076	0.855859515576688	0.855809837503298	0.855752519803284	0.855687563828151	0.855614971109492	0.85553474335895	0.855446882468167	0.855351390508737	0.855248269732147	0.855137522569718	0.855019151632537	0.854893159711385	0.854759549776665	0.854618324978317	0.854469488645737	0.85431304428768	0.854148995592171	0.853977346426401	0.853798100836621	0.853611263048034	0.853416837464679	0.853214828669311	0.853005241423275	0.852788080666379	0.852563351516754	0.852331059270718	0.852091209402632	0.851843807564749	0.851588859587057	0.851326371477123	0.851056349419927	0.850778799777695	0.850493729089719	0.850201144072184	0.84990105161798	0.849593458796513	0.849278372853514	0.848955801210834	0.848625751466246	0.848288231393234	0.847943248940776	0.847590812233128	0.847230929569601	0.846863609424329	0.846488860446037
0.855286461336252	0.855275003697386	0.855255907932866	0.855229174493069	0.855194804008507	0.855152797289805	0.855103155327686	0.85504587929294	0.854980970536391	0.854908430588863	0.854828261161139	0.854740464143911	0.854645041607731	0.854541995802955	0.85443132915968	0.85431304428768	0.854187143976333	0.854053631194547	0.853912509090678	0.853763780992443	0.853607450406834	0.853443521020015	0.853271996697231	0.853092881482693	0.852906179599475	0.852711895449395	0.852510033612896	0.852300598848921	0.852083596094782	0.851859030466029	0.851626907256303	0.851387231937198	0.851140010158109	0.850885247746076	0.850622950705626	0.850353125218609	0.850075777644025	0.849790914517856	0.849498542552881	0.849198668638492	0.84889129984051	0.848576443400984	0.848254106737997	0.847924297445458	0.847587023292898	0.847242292225249	0.846890112362632	0.846530492000127	0.846163439607548	0.845788963829208
0.854572526752839	0.854561077534094	0.854541995802955	0.854515282009572	0.854480936784135	0.854438960936859	0.854389355457963	0.854332121517641	0.854267260466031	0.85419477383318	0.854114663328999	0.854026930843221	0.853931578445344	0.85382860838458	0.853718023089789	0.853599825169419	0.853474017411427	0.853340602783211	0.853199584431524	0.853050965682388	0.852894750041008	0.852730941191673	0.852559542997656	0.852380559501106	0.852193994922945	0.851999853662744	0.85179814029861	0.851588859587057	0.851372016462876	0.851147616039002	0.850915663606373	0.850676164633785	0.850429124767744	0.850174549832309	0.849912445828933	0.849642818936299	0.849365675510152	0.849081022083121	0.848788865364543	0.848489212240277	0.848182069772513	0.847867445199584	0.847545345935758	0.847215779571042	0.846878753870966	0.846534276776375	0.846182356403206	0.845823001042264	0.845456219158995	0.845082019393251
0.853851489675439	0.85384004896252	0.853820981407606	0.853794287460613	0.853759967751408	0.853718023089789	0.853668454465467	0.853611263048034	0.853546450186934	0.853474017411427	0.853393966430547	0.853306299133052	0.853211017587378	0.853108124041579	0.852997620923266	0.852879510839543	0.852753796576935	0.85262048110131	0.852479567557801	0.852331059270718	0.85217495974346	0.852011272658417	0.851840001876869	0.851661151438885	0.851474725563206	0.851280728647136	0.851079165266418	0.85087004017511	0.850653358305454	0.850429124767744	0.850197344850184	0.849958024018742	0.849711167917002	0.849456782366009	0.84919487336411	0.848925447086787	0.848648509886492	0.848364068292467	0.848072129010567	0.84777269892308	0.847465785088529	0.847151394741483	0.846829535292361	0.846500214327219	0.846163439607548	0.845819219070058	0.845467560826456	0.845108473163227	0.8447419645414	0.844368043596317
0.853123366840299	0.853111934718774	0.853092881482693	0.85306620758174	0.853031913645453	0.85299000048321	0.852940469084207	0.852883320617428	0.852818556431617	0.852746178055238	0.852666187196434	0.852578585742984	0.852483375762247	0.852380559501106	0.852270139385911	0.852152118022409	0.852026498195672	0.851893282870027	0.851752475188967	0.851604078475072	0.851448096229914	0.851284532133965	0.851113390046493	0.850934674005458	0.850748388227402	0.850554537107334	0.850353125218609	0.850144157312801	0.849927638319579	0.849703573346565	0.849471967679198	0.849232826780588	0.848986156291367	0.848731962029534	0.848470249990294	0.848201026345895	0.847924297445458	0.847640069814803	0.847348350156269	0.847049145348528	0.846742462446398	0.846428308680649	0.846106691457801	0.845777618359921	0.845441097144417	0.845097135743817	0.844745742265556	0.844386924991749	0.844020692378963	0.843647053057981
0.852388175145892	0.852376751701186	0.852357712926312	0.852331059270718	0.852296791363611	0.852254910013945	0.852205416210394	0.852148311121328	0.852083596094782	0.852011272658417	0.851931342519477	0.851843807564749	0.851748669860503	0.851645931652442	0.851535595365637	0.851417663604466	0.851292139152534	0.851159024972606	0.851018324206522	0.85087004017511	0.850714176378098	0.850550736494018	0.850379724380103	0.850201144072184	0.85001499978458	0.84982129590998	0.849620037019324	0.84941122786168	0.84919487336411	0.848970978631538	0.84873954894661	0.848500589769547	0.848254106737997	0.848000105666878	0.847738592548222	0.847469573551008	0.847193055020992	0.846909043480532	0.846617545628413	0.846318568339656	0.846012118665332	0.845698203832371	0.845376831243353	0.845048008476316	0.844711743284535	0.844368043596317	0.844016917514778	0.843658373317615	0.843292419456885	0.842919064558763
0.851645931652442	0.851634516969837	0.851615492798306	0.851588859587057	0.851554617964964	0.851512768740549	0.851463312901963	0.851406251616954	0.851341586232841	0.85126931827647	0.851189449454181	0.851101981651755	0.851006916934364	0.850904257546516	0.850794005911994	0.850676164633785	0.850550736494018	0.850417724453878	0.850277131653531	0.850128961412038	0.849973217227263	0.849809902775777	0.849639021912756	0.84946057867188	0.84927457726522	0.849081022083121	0.848879917694085	0.848671268844642	0.848455080459225	0.84823135764003	0.848000105666878	0.847761329997071	0.847515036265241	0.847261230283196	0.846999918039758	0.846731105700603	0.846454799608084	0.846171006281066	0.845879732414738	0.845580984880432	0.845274770725434	0.84496109717279	0.844639971621103	0.844311401644332	0.843975394991585	0.843631959586896	0.843281103529016	0.842922835091183	0.842557162720891	0.842184095039662
0.850896653581442	0.850885247746076	0.850866238319782	0.850839625751528	0.850805410669848	0.850763593882832	0.850714176378098	0.850657159322767	0.850592544063433	0.850520332126124	0.85044052521626	0.850353125218609	0.850258134197232	0.850155554395431	0.850045388235684	0.849927638319579	0.849802307427746	0.849669398519777	0.849528914734148	0.849380859388132	0.849225235977709	0.849062048177468	0.84889129984051	0.848712994998339	0.848527137860754	0.848333732815733	0.848132784429311	0.847924297445458	0.847708276785947	0.847484727550217	0.847253655015237	0.847015064635359	0.846768962042166	0.846515353044323	0.84625424362741	0.845985639953763	0.845709548362301	0.845425975368352	0.845134927663477	0.844836412115279	0.844530435767219	0.844217005838417	0.843896129723458	0.843567814992184	0.843232069389483	0.842888900835079	0.84253831742331	0.842180327422904	0.841814939276751	0.841442161601668
0.850140358315174	0.850128961412038	0.850109966872633	0.850083375145682	0.850049186859377	0.85000740282137	0.849958024018742	0.84990105161798	0.849836486964946	0.849764331584839	0.849684587182153	0.84959725564063	0.84950233902321	0.849399839571975	0.849289759708085	0.849172102031714	0.849046869321978	0.84891406453686	0.848773690813127	0.848625751466246	0.848470249990294	0.848307190057857	0.848136575519939	0.847958410405845	0.84777269892308	0.847579445457228	0.847378654571835	0.847170331008281	0.846954479685652	0.846731105700603	0.846500214327219	0.846261811016872	0.846015901398067	0.845762491276289	0.845501586633845	0.845233193629696	0.84495731859929	0.844673968054385	0.844383148682871	0.844084867348587	0.843779131091126	0.843465947125647	0.843145322842671	0.842817265807877	0.842481783761897	0.842138884620094	0.841788576472351	0.841430867582839	0.841065766389794	0.840693281505278
0.849377063396213	0.849365675510152	0.849346695999041	0.849320125311356	0.849285964074946	0.849244213097017	0.84919487336411	0.84913794604207	0.849073432476021	0.849001334190323	0.848921652888533	0.848834390453361	0.84873954894661	0.848637130609131	0.848527137860754	0.848409573300222	0.848284439705123	0.848151740031813	0.848011477415334	0.847863655169327	0.847708276785947	0.847545345935758	0.847374866467641	0.847196842408684	0.847011277964072	0.846818177516972	0.846617545628413	0.846409387037159	0.846193706659583	0.845970509589525	0.84573980109816	0.845501586633845	0.845255871821976	0.845002662464829	0.8447419645414	0.844473784207243	0.844198127794297	0.843915001810715	0.843624412940679	0.843326368044223	0.843020874157035	0.842707938490268	0.84238756843034	0.842059771538726	0.841724555551754	0.841381928380386	0.841031898109999	0.840674473000164	0.840309661484413	0.839937472170007
0.848606786526934	0.848595407742644	0.848576443400984	0.848549893950181	0.848515760017737	0.84847404241041	0.848424742114192	0.848367860294282	0.848303398295057	0.84823135764003	0.848151740031813	0.848064547352068	0.847969781661457	0.847867445199584	0.847757540384932	0.847640069814803	0.847515036265241	0.847382442690957	0.847242292225249	0.847094588179918	0.846939334045172	0.846776533489536	0.846606190359746	0.846428308680649	0.846242892655086	0.846049946663784	0.845849475265227	0.845641483195541	0.845425975368352	0.845202956874663	0.844972432982702	0.844734409137787	0.84448889096217	0.844235884254885	0.843975394991585	0.84370742932438	0.843431993581667	0.843149094267954	0.842858738063681	0.842560931825035	0.84225568258376	0.841942997546964	0.841622884096919	0.841295349790853	0.840960402360746	0.840618049713113	0.840268299928783	0.839911161262677	0.839546642143576	0.839174751173891
0.847829545569015	0.847818175971039	0.847799226939735	0.84777269892308	0.847738592548222	0.847696908621467	0.847647648128254	0.847590812233128	0.847526402279712	0.847454419790664	0.847374866467641	0.847287744191249	0.847193055020992	0.847090801195215	0.846980985131048	0.846863609424329	0.846738676849545	0.846606190359746	0.846466153086471	0.846318568339656	0.846163439607548	0.846000770556609	0.845830565031411	0.845652827054534	0.845467560826456	0.845274770725434	0.845074461307388	0.844866637305771	0.844651303631442	0.844428465372531	0.844198127794297	0.843960296338983	0.843714976625667	0.843462174450107	0.84320189578458	0.84293414677772	0.842658933754342	0.842376263215275	0.842086141837177	0.841788576472351	0.841483574148557	0.841171142068817	0.840851287611213	0.840524018328687	0.840189341948826	0.839847266373652	0.8394977996794	0.839140950116294	0.838776726108319	0.838405136252984
0.847045358542923	0.847033998215654	0.847015064635359	0.84698855824976	0.846954479685652	0.846912829748881	0.846863609424329	0.846806819875882	0.846742462446398	0.846670538657674	0.846591050210401	0.846503998984117	0.846409387037159	0.846307216606604	0.846197490108205	0.846080210136332	0.845955379463894	0.845823001042264	0.845683078001203	0.845535613648767	0.845380611471221	0.845218075132941	0.845048008476316	0.844870415521636	0.84468530046699	0.844492667688144	0.844292521738424	0.844084867348587	0.843869709426696	0.843647053057981	0.843416903504697	0.843179266205986	0.84293414677772	0.842681551012347	0.842421484878736	0.842153954522005	0.841878966263358	0.841596526599904	0.841306642204482	0.841009319925473	0.840704566786613	0.840392389986796	0.840072796899875	0.839745795074459	0.839411392233702	0.839069596275086	0.838720415270206	0.838363857464545	0.83799993127724	0.837628645300851
0.84625424362741	0.846242892655086	0.846223974666196	0.846197490108205	0.846163439607548	0.846121823969612	0.846072644178712	0.846015901398067	0.845951596969768	0.845879732414738	0.845800309432694	0.845713329902097	0.845618795880104	0.845516709602508	0.845407073483679	0.845289890116497	0.845165162272281	0.84503289290071	0.844893085129749	0.844745742265556	0.844590867792393	0.844428465372531	0.844258538846152	0.844081092231236	0.843896129723458	0.843703655696069	0.843503674699773	0.843296191462608	0.843081210889811	0.842858738063681	0.842628778243446	0.842391336865109	0.842146419541307	0.841894032061147	0.841634180390053	0.841366870669596	0.841092109217329	0.840809902526608	0.840520257266413	0.840223180281165	0.839918678590535	0.83960675938925	0.839287430046891	0.838960698107692	0.838626571290327	0.838285057487697	0.837936164766712	0.837579901368061	0.837216275705989	0.83684529636806
0.845456219158995	0.8454448776257	0.845425975368352	0.845399512834158	0.845365490649189	0.845323909618365	0.845274770725434	0.845218075132941	0.845153824182199	0.845082019393251	0.845002662464829	0.844915755274307	0.844821299877649	0.844719298509355	0.844609753582394	0.844492667688144	0.844368043596317	0.844235884254885	0.844096192789995	0.843948972505889	0.843794226884807	0.843631959586896	0.843462174450107	0.843284875490089	0.843100066900078	0.842907753050784	0.842707938490268	0.842500627943818	0.842285826313816	0.842063538679607	0.841833770297357	0.841596526599904	0.841351813196613	0.841099635873221	0.840840000591671	0.840572913489955	0.840298380881936	0.84001640925718	0.839727005280774	0.839430175793137	0.839125927809836	0.83881426852139	0.838495205293066	0.838168745664679	0.837834897350382	0.837493668238449	0.837145066391056	0.836789100044056	0.836425777606753	0.836055107661662
0.844651303631442	0.844639971621103	0.844621085235172	0.844594644920597	0.844560651303082	0.844519105187077	0.844470007555753	0.844413359570976	0.844349162573274	0.844277418081802	0.844198127794297	0.844111293587035	0.844016917514778	0.843915001810715	0.843805548886405	0.843688561331708	0.843564041914714	0.843431993581667	0.843292419456885	0.843145322842671	0.842990707219226	0.84282857624455	0.842658933754342	0.842481783761897	0.842297130457989	0.842104978210764	0.84190533156561	0.84169819524504	0.841483574148557	0.841261473352519	0.841031898109999	0.840794853850642	0.840550346180512	0.840298380881936	0.840038963913348	0.839772101409122	0.8394977996794	0.839216065209919	0.838926904661832	0.838630324871521	0.838326332850409	0.838014935784763	0.837696141035498	0.837369956137966	0.837036388801754	0.836695446910463	0.836347138521491	0.835991471865808	0.835628455347728	0.83525809754467
0.843839515695232	0.843828193291616	0.843809322916716	0.843782905017213	0.843748940218443	0.84370742932438	0.843658373317615	0.843601773359327	0.843537630789252	0.843465947125647	0.843386724065247	0.843299963483216	0.843205667433103	0.843103838146777	0.842994478034369	0.842877589684209	0.842753175862749	0.842621239514489	0.842481783761897	0.842334811905322	0.842180327422904	0.842018333970476	0.841848835381465	0.841671835666786	0.841487339014731	0.841295349790853	0.841095872537845	0.840888911975417	0.840674473000164	0.840452560685429	0.840223180281165	0.839986337213789	0.839742037086032	0.839490285676783	0.839231088940929	0.838964453009193	0.838690384187958	0.838408888959097	0.838119973979792	0.837823646082348	0.837519912274002	0.837208779736733	0.836890255827056	0.836564348075822	0.836231064188006	0.835890412042491	0.835542399691853	0.83518703536213	0.834824327452597	0.83445428453553
0.843020874157035	0.843009561443751	0.842990707219226	0.842964311929875	0.842930376200661	0.842888900835079	0.842839886815132	0.842783335301306	0.842719247632539	0.84264762532618	0.84256847007795	0.842481783761897	0.84238756843034	0.842285826313816	0.842176559821018	0.842059771538726	0.841935464231741	0.841803640842802	0.841664304492511	0.841517458479243	0.841363106279056	0.841201251545597	0.841031898109999	0.840855049980775	0.840670711343708	0.840478886561736	0.840279580174832	0.840072796899875	0.839858541630524	0.839636819437077	0.83940763556634	0.839170995441469	0.838926904661832	0.838675369002845	0.838416394415817	0.838149987027782	0.83787615314133	0.837594899234434	0.837306231960264	0.837010158147011	0.836706684797688	0.83639581908994	0.836077568375846	0.835751940181708	0.835418942207848	0.835078582328386	0.834730868591028	0.834375809216835	0.834013412599995	0.833643687307591
0.842195397979168	0.842184095039662	0.842165257104589	0.842138884620094	0.842104978210764	0.842063538679607	0.842014567008038	0.841958064355841	0.841894032061147	0.84182247164039	0.841743384788269	0.8416567733777	0.841562639459766	0.841460985263658	0.841351813196613	0.841235125843854	0.841110925968509	0.840979216511543	0.840840000591671	0.840693281505278	0.84053906272632	0.840377347906237	0.840208140873845	0.840031445635232	0.839847266373652	0.839655607449401	0.839456473399704	0.839249868938585	0.839035798956737	0.83881426852139	0.838585282876164	0.838348847440931	0.838104967811659	0.837853649760262	0.837594899234434	0.837328722357487	0.837055125428183	0.836774114920554	0.836485697483725	0.836189879941731	0.835886669293321	0.835576072711768	0.83525809754467	0.83493275131374	0.834600041714598	0.834259976616562	0.833912564062418	0.833557812268203	0.833195729622972	0.832826324688565
0.841363106279056	0.841351813196613	0.841332991689797	0.841306642204482	0.841272765364872	0.841231361973491	0.841182433011152	0.841125979636936	0.841062003188156	0.840990505180325	0.840911487307109	0.840824951440283	0.84073089962968	0.840629334103133	0.840520257266413	0.840403671703164	0.840279580174832	0.840147985620587	0.840008891157244	0.839862300079174	0.839708215858215	0.839546642143576	0.839377582761738	0.839201041716341	0.839017023188081	0.838825531534594	0.838626571290327	0.838420147166423	0.838206264050583	0.837984927006936	0.837756141275891	0.837519912274002	0.837276245593809	0.837025147003685	0.836766622447679	0.836500678045347	0.836227320091584	0.835946555056447	0.835658389584976	0.835362830497012	0.835059884787001	0.834749559623802	0.834431862350488	0.834106800484142	0.833774381715641	0.83343461390945	0.833087505103393	0.832733063508436	0.832371297508451	0.832002215659987
0.840524018328687	0.840512735186426	0.840493930246397	0.8404676039542	0.840433756933657	0.840392389986796	0.840343504093828	0.84028710041312	0.840223180281165	0.840151745212542	0.840072796899875	0.839986337213789	0.839892368202854	0.839790892093533	0.839681911290116	0.839565428374656	0.8394414461069	0.839309967424206	0.839170995441469	0.839024533451032	0.838870584922592	0.838709153503109	0.838540243016702	0.838363857464545	0.838180001024754	0.837988678052273	0.837789893078751	0.837583650812422	0.837369956137966	0.837148814116382	0.836920229984842	0.836684209156546	0.836440757220574	0.836189879941731	0.835931583260382	0.835665873292293	0.835392756328457	0.835112238834919	0.834824327452597	0.834529028997097	0.834226350458521	0.833916299001276	0.833598881963869	0.833274106858705	0.832941981371878	0.832602513362953	0.832255710864748	0.831901582083109	0.831540135396679	0.831171379356664
0.839678153554052	0.839666880434926	0.839648092199939	0.839621789294412	0.839587972341782	0.839546642143576	0.8394977996794	0.8394414461069	0.839377582761738	0.839306211157552	0.839227332985917	0.839140950116294	0.839047064595981	0.838945678650056	0.838836794681315	0.838720415270206	0.83859654317476	0.838465181330509	0.838326332850409	0.838180001024754	0.838026189321083	0.837864901384085	0.837696141035498	0.837519912274002	0.837336219275112	0.837145066391056	0.836946458150659	0.836740399259217	0.836526894598365	0.83630594922594	0.836077568375846	0.835841757457902	0.835598522057695	0.835347867936427	0.835089801030748	0.834824327452597	0.834551453489029	0.834271185602041	0.83398353042839	0.833688494779409	0.833386085640817	0.833076310172525	0.832759175708434	0.832434689756229	0.832102859997175	0.831763694285893	0.831417200650148	0.831063387290619	0.830702262580672	0.830333835066123
0.838825531534594	0.83881426852139	0.838795497129418	0.838769217803723	0.838735431167348	0.83869413802132	0.838645339344629	0.838589036294197	0.838525230204846	0.838453922589268	0.838375115137973	0.838288809719251	0.838195008379115	0.838093713341247	0.837984927006936	0.837868651955009	0.837744890941764	0.83761364690089	0.837474922943389	0.837328722357487	0.837175048608543	0.837013905338956	0.83684529636806	0.836669225692021	0.836485697483725	0.836294716092662	0.836096286044807	0.835890412042491	0.835677098964274	0.835456351864806	0.83522817597469	0.834992576700334	0.834749559623802	0.834499130502656	0.8342412952698	0.833976060033311	0.83370343107627	0.833423414856588	0.833136018006823	0.832841247333997	0.832539109819406	0.832229612618424	0.831912763060303	0.831588568647966	0.831257037057803	0.830918176139449	0.830571993915567	0.830218498581625	0.829857698505661	0.829489602228053
0.837966172002641	0.837954919177975	0.837936164766712	0.837909909213613	0.83787615314133	0.837834897350382	0.837786142819138	0.837729890703787	0.837666142338309	0.837594899234434	0.837516163081604	0.837429935746924	0.837336219275112	0.83723501588844	0.837126327986675	0.837010158147011	0.836886509123997	0.836755383849463	0.836616785432436	0.836470717159057	0.836317182492487	0.836156185072811	0.835987728716939	0.8358118174185	0.835628455347728	0.83543764685135	0.835239396452463	0.835033708850408	0.834820588920641	0.834600041714598	0.834372072459551	0.834136686558465	0.833893889589847	0.833643687307591	0.833386085640817	0.833121090693706	0.832848708745331	0.832568946249477	0.832281809834467	0.831987306302974	0.831685442631828	0.831376225971826	0.831059663647529	0.830735763157056	0.830404532171878	0.830065978536596	0.82972011026873	0.829366935558484	0.829006462768524	0.82863870043374
0.837100094842841	0.837088852289158	0.837070114996011	0.837043883407878	0.837010158147011	0.836968940013418	0.836920229984842	0.836864029216734	0.836800339042219	0.836729160972064	0.836650496694627	0.836564348075822	0.836470717159057	0.836369606165184	0.836261017492432	0.836144953716348	0.836021417589716	0.835890412042491	0.835751940181708	0.835606005291403	0.835452610832518	0.835291760442806	0.835123457936731	0.834947707305359	0.834764512716251	0.834573878513345	0.834375809216835	0.834170309523045	0.8339573843043	0.83373703860879	0.833509277660428	0.833274106858705	0.833031531778541	0.832781558170126	0.832524191958763	0.832259439244704	0.831987306302974	0.831707799583199	0.831420925709427	0.831126691479942	0.83082510386707	0.83051617001699	0.830199897249529	0.829876293057959	0.829545365108786	0.829207121241538	0.828861569468537	0.828508717974684	0.828148575117221	0.8277811494255
0.836227320091584	0.836216087891158	0.836197367853249	0.836171160422047	0.836137466219402	0.836096286044807	0.836047620875374	0.835991471865808	0.835927840348375	0.835856727832863	0.835778136006544	0.835692066734125	0.835598522057695	0.835497504196671	0.835389015547735	0.835273058684767	0.835149636358775	0.835018751497817	0.834880407206922	0.834734606768002	0.834581353639759	0.834420651457594	0.834252504033502	0.834076915355965	0.833893889589847	0.83370343107627	0.833505544332501	0.83330023405182	0.833087505103393	0.832867362532135	0.83263981155857	0.832404857578684	0.832162506163776	0.831912763060303	0.831655634189716	0.831391125648301	0.831119243707	0.830839994811244	0.830553385580767	0.830259422809424	0.829958113464999	0.829649464689011	0.829333483796511	0.82901017827588	0.828679555788618	0.828341624169128	0.827996391424497	0.827643865734269	0.827284055450216	0.826916969096104
0.835347867936427	0.835336646171358	0.835317943525517	0.835291760442806	0.83525809754467	0.83521695563008	0.835168335675512	0.835112238834919	0.835048666439698	0.834977619998654	0.834899101197959	0.834813111901105	0.834719654148849	0.834618730159162	0.834510342327161	0.83439449322505	0.834271185602041	0.834140422384282	0.834002206674775	0.833856541753289	0.83370343107627	0.833542878276743	0.833374887164212	0.833199461724555	0.833016606119911	0.832826324688565	0.832628621944829	0.832423502578913	0.832210971456794	0.831991033620087	0.831763694285893	0.831528958846665	0.83128683287005	0.831037322098734	0.830780432450287	0.83051617001699	0.830244541065669	0.829965552037522	0.829679209547931	0.829385520386284	0.829084491515781	0.828776130073239	0.828460443368894	0.828137438886191	0.827807124281581	0.827469507384298	0.827124596196143	0.82677239889126	0.826412923815902	0.826046179488199
0.834461758715509	0.834450547467722	0.834431862350488	0.834405703807419	0.834372072459551	0.83433096910533	0.834282394720588	0.834226350458521	0.83416283764965	0.834091857801787	0.834013412599995	0.833927503906539	0.833834133760835	0.833733304379393	0.833625018155755	0.833509277660428	0.833386085640817	0.833255445021141	0.833117358902359	0.832971830562078	0.832818863454466	0.832658461210153	0.83249062763613	0.832315366715648	0.832132682608098	0.831942579648902	0.831745062349392	0.831540135396679	0.831327803653527	0.831108072158217	0.830880946124402	0.830646430940968	0.830404532171878	0.830155255556017	0.829898607007035	0.829634592613177	0.829363218637118	0.829084491515781	0.828798417860161	0.82850500445514	0.828204258259293	0.827896186404696	0.827580796196725	0.827258095113848	0.826928090807421	0.826590791101464	0.826246203992449	0.82589433764907	0.825535200412012	0.825168800793722
0.833569012916961	0.833557812268203	0.833539144815821	0.833513011003133	0.833479411450761	0.833438346956623	0.833389818495903	0.833333827221031	0.833270374461644	0.833199461724555	0.833121090693706	0.833035263230127	0.832941981371878	0.832841247333997	0.832733063508436	0.832617432463994	0.832494356946248	0.832363839877476	0.832225884356573	0.832080493658966	0.831927671236526	0.831767420717467	0.831599745906246	0.83142465078346	0.831242139505733	0.831052216405598	0.830854885991378	0.830650152947062	0.830438022132172	0.830218498581625	0.829991587505597	0.829757294289375	0.829515624493206	0.829266583852142	0.82901017827588	0.828746413848593	0.828475296828766	0.828196833649014	0.827911030915906	0.827617895409777	0.827317434084539	0.827009654067485	0.826694562659088	0.826372167332799	0.82604247573483	0.825705495683947	0.825361235171242	0.825009702359914	0.824650905585035	0.824284853353314
0.832669651178313	0.832658461210153	0.83263981155857	0.832613702666583	0.832580135154402	0.832539109819406	0.83249062763613	0.83243468975623	0.832371297508451	0.832300452398598	0.832222156109484	0.832136410500891	0.832043217609513	0.831942579648902	0.831834499009407	0.831718978258105	0.83159602013873	0.831465627571599	0.831327803653527	0.831182551657744	0.831029875033801	0.830869777407476	0.830702262580672	0.830527334531309	0.830344997413217	0.830155255556017	0.829958113464999	0.829753575821001	0.829541647480273	0.829322333474344	0.829095639009879	0.828861569468537	0.828620130406818	0.828371327555904	0.828115166821508	0.827851654283695	0.827580796196725	0.827302598988867	0.827017069262226	0.826724213792552	0.826424039529052	0.826116553594195	0.825801763283512	0.825479676065388	0.825150299580853	0.824813641643369	0.824469710238606	0.824118513524218	0.823760059829615	0.823394357655721
0.831763694285893	0.831752515079719	0.831733883364582	0.831707799583199	0.831674264355361	0.831633278477909	0.831584842924718	0.831528958846665	0.831465627571599	0.831394850604303	0.831316629626455	0.831230966496576	0.831137863249985	0.831037322098734	0.830929345431555	0.830813935813787	0.830691095987307	0.830560828870454	0.830423137557945	0.830278025320793	0.830125495606212	0.829965552037522	0.829798198414047	0.829623438711012	0.829441277079426	0.829251717845974	0.829054765512888	0.828850424757826	0.82863870043374	0.82841959756874	0.828193121365952	0.827959277203376	0.827718070633729	0.827469507384298	0.827213593356769	0.82695033462707	0.826679737445198	0.826401808235039	0.826116553594195	0.825823980293792	0.825524095278294	0.825216905665304	0.824902418745366	0.824580641981759	0.824251583010287	0.823915249639061	0.823571649848282	0.823220791790015	0.822862683787956	0.822497334337199
0.830851163174223	0.830839994811244	0.830821381167895	0.830795322686594	0.830761819986708	0.830720873864534	0.830672485293283	0.830616655423047	0.830553385580767	0.830482677270201	0.830404532171878	0.830318952143051	0.830225939217648	0.830125495606212	0.830017623695843	0.829902326050127	0.829779605409068	0.829649464689011	0.829511906982558	0.829366935558484	0.829214553861647	0.829054765512888	0.828887574308932	0.828712984222282	0.828530999401108	0.828341624169128	0.828144863025494	0.827940720644655	0.827729201876239	0.827510311744907	0.827284055450216	0.827050438366475	0.82680946604259	0.826561144201912	0.826305478742075	0.82604247573483	0.825772141425874	0.825494482234676	0.825209504754294	0.824917215751194	0.824617622165054	0.82431073110857	0.823996549867259	0.823675085899251	0.823346346835075	0.823010340477452	0.822667074801064	0.82231655795234	0.821958798249215	0.821593804180903
0.829932078925409	0.829920921486648	0.829902326050127	0.829876293057959	0.829842823129083	0.829801917059251	0.829753575821001	0.829697800563634	0.829634592613177	0.829563953472353	0.829485884820533	0.82940038851369	0.829307466584352	0.829207121241538	0.829099354870702	0.828984170033663	0.828861569468537	0.828731556089657	0.828594132987492	0.828449303428563	0.828297070855348	0.828137438886191	0.827970411315195	0.82779599211212	0.827614185422269	0.827424995566374	0.827228427040473	0.827024484515788	0.826813172838589	0.82659449703006	0.82636846228616	0.826135073977476	0.82589433764907	0.825646259020326	0.825390843984789	0.825128098609998	0.824858029137318	0.824580641981759	0.824295943731802	0.824003941149209	0.823704641168833	0.823398050898424	0.823084177618429	0.822763028781782	0.8224346120137	0.82209893511146	0.821756006044188	0.821405832952622	0.821048424148893	0.820683788116281
0.829006462768524	0.828995316334821	0.82897673923986	0.828950731925444	0.828917295010084	0.828876429288979	0.828828135733991	0.828772415493622	0.828709269892979	0.82863870043374	0.828560708794107	0.828475296828766	0.828382466568829	0.82828222022178	0.828174560171415	0.828059488977771	0.827937009377058	0.827807124281581	0.827669836779659	0.827525150135538	0.827373067789301	0.827213593356769	0.827046730629403	0.826872483574197	0.826690856333563	0.826501853225222	0.826305478742075	0.826101737552085	0.825890634498138	0.825672174597915	0.825446363043743	0.825213205202456	0.824972706615242	0.824724872997485	0.824469710238606	0.824207224401899	0.823937421724355	0.823660308616495	0.823375891662179	0.823084177618429	0.822785173415234	0.822478886155354	0.822165323114124	0.821844491739242	0.821516399650562	0.821181054639881	0.820838464670714	0.820488637878067	0.820131582568215	0.819767307218457
0.828074336078992	0.828063200731001	0.828044642112019	0.828018660663541	0.827985257003644	0.827944431926968	0.827896186404696	0.827840521584524	0.827777438790629	0.827706939523636	0.827629025460573	0.827543698454821	0.827450960536071	0.827350813910256	0.827243260959499	0.827128304242041	0.827005946492172	0.826876190620151	0.82673903971213	0.82659449703006	0.826442566011608	0.826283250270055	0.826116553594195	0.825942479948233	0.825761033471669	0.825572218479184	0.82537603946052	0.82517250108035	0.824961608178152	0.82474336576807	0.824517779038774	0.824284853353314	0.824044594248968	0.823797007437088	0.823542098802938	0.823279874405531	0.823010340477452	0.822733503424688	0.822449369826447	0.822157946434968	0.821859240175336	0.821553258145282	0.821240007614985	0.820919496026863	0.820591730995367	0.820256720306763	0.81991447191891	0.819564993961039	0.819208294733516	0.818844382707611
0.827135720377957	0.827124596196143	0.827106056187248	0.827080100792455	0.827046730629403	0.827005946492172	0.826957749351256	0.826902140353539	0.826839120822264	0.826768692256992	0.826690856333563	0.826605614904051	0.826512969996706	0.826412923815902	0.826305478742075	0.826190637331656	0.826068402316995	0.825938776606293	0.825801763283512	0.825657365608294	0.825505587015869	0.825346431116954	0.825179901697659	0.825006002719375	0.824824738318664	0.824636112807144	0.82444013067137	0.824236796572702	0.82402611534718	0.823808092005382	0.823582731732289	0.823350039887137	0.823110022003264	0.822862683787956	0.822608031122286	0.822346070060948	0.822076806832086	0.82180024783712	0.821516399650562	0.821225269019834	0.820926862865074	0.820621188278941	0.820308252526418	0.819988063044601	0.819660627442491	0.819325953500779	0.818984049171625	0.81863492257843	0.818278582015609	0.817915035948353
0.826190637331656	0.826179524396295	0.826161003131279	0.826135073977476	0.826101737552085	0.826060994648618	0.826012846236877	0.825957293462929	0.82589433764907	0.825823980293792	0.825746223071741	0.825661067833664	0.825568516606366	0.825468571592647	0.825361235171242	0.825246509896755	0.825124398499585	0.824994903885853	0.824858029137318	0.824713777511291	0.824562152440546	0.824403157533216	0.824236796572702	0.824063073517561	0.823881992501392	0.823693557832728	0.823497773994907	0.82329464564595	0.823084177618429	0.822866374919332	0.822641242729919	0.822408786405579	0.822169011475678	0.821921923643405	0.821667528785605	0.821405832952622	0.821136842368121	0.820860563428916	0.820577002704788	0.820286166938298	0.819988063044601	0.819682698111243	0.819370079397966	0.819050214336502	0.818723110530358	0.818388775754605	0.818047217955654	0.817698445251035	0.817342465929159	0.816979288449089
0.825239108750779	0.825228007141957	0.825209504754294	0.825183602028341	0.825150299580853	0.82510959820477	0.825061498869197	0.825006002719375	0.824943111076648	0.82487282543843	0.82479514747816	0.824710079045253	0.824617622165054	0.824517779038774	0.824410552043436	0.824295943731802	0.824173956832304	0.824044594248968	0.823907859061329	0.823763754524351	0.823612284068327	0.823453451298792	0.823287259996413	0.823113714116887	0.822932817790832	0.822744575323665	0.822548991195486	0.822346070060948	0.822135816749128	0.821918236263391	0.821693333781249	0.821461114654215	0.821221584407648	0.820974748740606	0.820720613525676	0.820459184808812	0.820190468809167	0.81991447191891	0.819631200703053	0.81934066189926	0.819042862417658	0.818737809340641	0.818425509922669	0.818105971590064	0.817779201940797	0.817445208744272	0.817103999941107	0.81675558364291	0.816399968132043	0.816037161861391
0.824281156589834	0.824270066387444	0.824251583010287	0.824225706898595	0.824192438668674	0.82415177911289	0.824103729199643	0.824048290073342	0.823985463054373	0.823915249639061	0.823837651499629	0.82375267048415	0.823660308616495	0.823560568096278	0.823453451298792	0.823338960774944	0.823217099251183	0.823087869629421	0.822951274986955	0.822807318576378	0.82265600382549	0.822497334337199	0.822331313889419	0.822157946434968	0.821977236101453	0.821789187191153	0.821593804180903	0.82139109172196	0.821181054639881	0.820963697934379	0.820739026779186	0.820507046521906	0.820267762683863	0.820021180959949	0.819767307218457	0.81950614750092	0.819237708021938	0.818961995169002	0.818679015502316	0.818388775754605	0.81809128283093	0.817786543808491	0.817474565936425	0.8171553566356	0.816828923498404	0.816495274288533	0.816154416940764	0.815806359560736	0.815451110424712	0.815088677979349
0.823316802946494	0.823305724230234	0.823287259996413	0.823261410684939	0.823228176911669	0.823187559468387	0.823139559322783	0.823084177618429	0.823021415674743	0.822951274986955	0.82287375722606	0.822788864238779	0.822696598047499	0.822596960850221	0.822489955020496	0.822375583107363	0.822253847835267	0.822124752103995	0.821988298988584	0.821844491739242	0.821693333781249	0.82153482871487	0.821368980315245	0.821195792532285	0.821015269490566	0.820827415489204	0.820632235001741	0.820429732676015	0.820219913334029	0.820002781971818	0.819778343759304	0.819546604040151	0.819307568331616	0.81906124232439	0.818807631882441	0.818546743042843	0.818278582015609	0.818003155183514	0.817720469101913	0.817430530498556	0.817133346273399	0.816828923498404	0.816517269417342	0.816198391445586	0.815872297169897	0.815538994348214	0.81519849090943	0.814850794953166	0.814495914749539	0.814133858738929
0.822346070060948	0.822335002910322	0.82231655795234	0.822290735626587	0.822257536548464	0.822216961509169	0.822169011475678	0.822113687590719	0.822050991172734	0.821980923715847	0.821903486889821	0.821818682540008	0.821726512687302	0.82162697952808	0.821520085434136	0.821405832952622	0.821284224805971	0.821155263891822	0.821018953282937	0.820875296227117	0.820724296147108	0.820565956640505	0.820400281479654	0.820227274611539	0.820046940157677	0.819859282413998	0.819664305850725	0.819462015112247	0.819252415016991	0.81903551055728	0.818811306899196	0.818579809382434	0.818341023520151	0.818094954998805	0.817841609678002	0.817580993590325	0.817313112941161	0.817037974108533	0.81675558364291	0.816465948267028	0.816169074875693	0.815864970535593	0.815553642485089	0.815235098134013	0.814909345063459	0.814576391025562	0.814236243943284	0.81388891191018	0.813534403190174	0.81317272621732
0.821368980315245	0.821357924809558	0.821339499259592	0.821313704104601	0.821280539959529	0.821240007614985	0.821192108037224	0.821136842368121	0.821074211925137	0.821004218201282	0.820926862865074	0.820842147760489	0.820750074906916	0.820650646499089	0.820543864907039	0.820429732676015	0.820308252526418	0.820179427353725	0.820043260228405	0.819899754395833	0.819748913276199	0.819590740464412	0.819425239729998	0.819252415016991	0.819072270443827	0.818884810303223	0.818690039062059	0.818487961361248	0.818278582015609	0.818061906013728	0.817837938517817	0.81760668486357	0.817368150560009	0.817122341289329	0.816869262906741	0.816608921440297	0.816341323090727	0.816066474231261	0.815784381407446	0.815495051336963	0.81519849090943	0.814894707186217	0.814583707400234	0.814265498955731	0.813940089428085	0.813607486563588	0.813267698279219	0.812920732662424	0.812566597970883	0.812205302632274
0.82038555623263	0.820374512450992	0.820356106440884	0.820330338641234	0.820297209666522	0.820256720306763	0.820208871527486	0.820153664469708	0.8200911004499	0.820021180959949	0.819943907667118	0.819859282413998	0.819767307218457	0.819667984273582	0.819561315947617	0.819447304783898	0.819325953500779	0.819197264991558	0.81906124232439	0.818917888742209	0.818767207662627	0.818609202677846	0.81844387755455	0.818271236233801	0.81809128283093	0.817904021635416	0.817709457110768	0.817507593894398	0.817298436797488	0.817081990804859	0.816858261074822	0.816627252939037	0.816388971902363	0.816143423642698	0.815890614010819	0.815630549030217	0.815363234896927	0.815088677979349	0.814806884818069	0.814517862125673	0.814221616786554	0.81391815585672	0.813607486563588	0.813289616305782	0.812964552652922	0.812632303345404	0.812292876294184	0.811946279580548	0.811592521455887	0.811231610341451
0.819395820476881	0.819384788498197	0.819366402159459	0.81934066189926	0.819307568331616	0.819267122245942	0.819219324607037	0.819164176555052	0.819101679405459	0.819031834649015	0.818954643951718	0.818870109154764	0.818778232274489	0.818679015502316	0.818572461204693	0.818458571923026	0.818337350373606	0.818208799447534	0.818072922210638	0.817929721903386	0.817779201940797	0.817621365912341	0.817456217581841	0.817283760887363	0.817103999941107	0.816916939029292	0.816722582612029	0.816520935323201	0.816312001970329	0.816095787534433	0.815872297169897	0.815641536204317	0.815403510138354	0.815158224645576	0.814905685572294	0.814645898937402	0.814378870932202	0.814104607920229	0.813823116437069	0.813534403190174	0.81323847505867	0.812935339093162	0.812625002515534	0.81230747271874	0.811982757266594	0.811650863893558	0.811311800504514	0.810965575174543	0.810612196148694	0.810251671841745
0.818399795851628	0.818388775754605	0.81837040921841	0.818344696681303	0.818311638756829	0.818271236233801	0.81822349007628	0.818168401423546	0.818105971590064	0.818036202065453	0.817959094514437	0.817874650776802	0.817782872867343	0.817683762975807	0.817577323466832	0.817463556879879	0.817342465929159	0.817214053503561	0.817078322666564	0.816935276656157	0.816784918884741	0.816627252939037	0.816462282579983	0.816290011742626	0.816110444536013	0.815923585243075	0.8157294383205	0.815528008398616	0.815319300281251	0.815103318945601	0.814880069542089	0.814649557394217	0.814411787998416	0.814166767023888	0.813914500312448	0.813654993878355	0.813388253908144	0.813114286760445	0.812833098965806	0.812544697226508	0.812249088416368	0.811946279580548	0.811636277935355	0.81131909086803	0.81099472593654	0.810663190869361	0.810324493565259	0.809978642093062	0.809625644691429	0.809265509768614
0.817397505299686	0.817386497162825	0.817368150560009	0.817342465929159	0.817309443883348	0.817269085210781	0.817221390874776	0.817166362013733	0.817103999941107	0.817034306145366	0.816957282289952	0.816872930213231	0.816781251928445	0.816682249623651	0.816575925661663	0.816462282579983	0.816341323090727	0.816213050080554	0.816077466610578	0.815934575916287	0.815784381407446	0.815626886668006	0.815462095455997	0.815290011703425	0.815110639516159	0.814923983173817	0.814730047129641	0.814528836010372	0.814320354616121	0.814104607920229	0.813881601069128	0.813651339382194	0.813413828351596	0.81316907364214	0.812917081091107	0.812657856708089	0.812391406674812	0.81211773734497	0.811836855244034	0.81154876706907	0.81125347968855	0.810951000142151	0.810641335640559	0.810324493565259	0.810000481468326	0.809669307072208	0.809330978269506	0.808985503122747	0.808632889864153	0.808273146895405
0.816388971902363	0.816377975803961	0.816359649265018	0.816333992723113	0.816301006790843	0.8162606922558	0.816213050080554	0.816158081402621	0.816095787534433	0.816026169963302	0.815949230351376	0.815864970535593	0.815773392527628	0.815674498513837	0.815568290855196	0.815454772087231	0.815333944919949	0.815205812237761	0.8150703770994	0.814927642737831	0.814777612560167	0.814620290147564	0.814455679255125	0.814283783811791	0.814104607920229	0.81391815585672	0.813724432071031	0.813523441186292	0.813315187998867	0.813099677478214	0.812876914766742	0.812646905179672	0.812409654204879	0.812165167502738	0.811913450905963	0.811654510419441	0.811388352220059	0.811114982656531	0.810834408249215	0.810546635689925	0.810251671841745	0.809949523738826	0.809640198586192	0.809323703759527	0.809000046804971	0.808669235438898	0.808331277547697	0.807986181187547	0.807633954584184	0.807274606132667
0.815374218878779	0.815363234896927	0.815344928552005	0.815319300281251	0.81528635069678	0.815246080585568	0.81519849090943	0.815143582804991	0.815081357583654	0.815011816731566	0.81493496190957	0.814850794953166	0.81475931787245	0.814660532852064	0.814554442251132	0.814441048603191	0.814320354616121	0.814192363172071	0.81405707732737	0.813914500312448	0.813764635531739	0.813607486563588	0.813443057160146	0.813271351247268	0.813092372924394	0.812906126464443	0.81271261631368	0.8125118470916	0.81230382359079	0.812088550776794	0.811866033787972	0.811636277935355	0.811399288702493	0.811155071745297	0.81090363289188	0.810644978142389	0.810379113668834	0.810106045814914	0.809825781095834	0.809538326198119	0.809243687979421	0.808941873468326	0.808632889864153	0.808316744536744	0.807993445026255	0.807662999042943	0.80732541446694	0.806980699348027	0.806628861905407	0.806269910527467
0.814353269585167	0.814342297797748	0.814324011776651	0.814298411958768	0.814265498955731	0.814225273553894	0.814177736714311	0.81412288957271	0.814060733439458	0.813991269799527	0.813914500312448	0.813830426812268	0.813739051307495	0.813640375981045	0.813534403190174	0.813421135466416	0.813300575515509	0.81317272621732	0.81303759062576	0.812895171968702	0.812745473647885	0.812588499238818	0.812424252490681	0.812252737326216	0.812073957841617	0.811887918306411	0.811694623163341	0.811494077028233	0.811286284689872	0.81107125110986	0.810848981422476	0.810619480934532	0.810382755125219	0.810138809645951	0.809887650320205	0.809629283143354	0.809363714282496	0.809090950076276	0.808810997034707	0.808523861838985	0.808229551341292	0.807928072564608	0.807619432702502	0.807303639118932	0.806980699348027	0.806650621093879	0.806313412230316	0.805969080800677	0.805617635017582	0.805259083262694
0.81332614751418	0.813315187998867	0.813296922431048	0.813271351247268	0.81323847505867	0.813198294650982	0.813150810984495	0.813096025194029	0.813033938588909	0.812964552652922	0.812887869044277	0.812803889595561	0.81271261631368	0.812614051379809	0.812508197149325	0.812395056151743	0.812274631090643	0.812146924843595	0.812011940462073	0.811869681171373	0.811720150370518	0.811563351632163	0.811399288702493	0.811227965501117	0.811049386120954	0.810863554828119	0.810670476061802	0.810470154434137	0.810262594730078	0.810047801907254	0.809825781095834	0.80959653759838	0.809360076889692	0.809116404616653	0.80886552659807	0.808607448824508	0.808342177458113	0.808069718832441	0.807790079452278	0.807503265993446	0.807209285302622	0.806908144397134	0.806599850464761	0.806284410863531	0.805961833121505	0.805632124936563	0.805295294176183	0.804951348877214	0.804600297245644	0.804242147656366
0.812292876294184	0.812281929128439	0.812263684143	0.81223814177406	0.812205302632274	0.812165167502738	0.81211773734497	0.812063013292881	0.812000996654742	0.811931688913149	0.811855091724981	0.811771206921349	0.811680036507548	0.811581582662999	0.811475847741187	0.811362834269593	0.811242544949623	0.811114982656531	0.810980150439338	0.810838051520744	0.810688689297037	0.810532067337996	0.810368189386789	0.810197059359868	0.810018681346854	0.809833059610425	0.809640198586192	0.80944010288257	0.809232777280651	0.809018226734067	0.808796456368844	0.808567471483262	0.808331277547697	0.808087880204472	0.807837285267687	0.807579498723063	0.807314526727759	0.807042375610206	0.806763051869919	0.806476562177315	0.806182913373519	0.805882112470166	0.805574166649207	0.805259083262694	0.804936869832575	0.804607534050474	0.804271083777472	0.803927527043879	0.803576872049005	0.80321912716092
0.81125347968855	0.811242544949623	0.811224320675311	0.811198807301455	0.811166005438215	0.811125915870051	0.811078539555706	0.81102387762817	0.810961931394657	0.810892702336563	0.810816192109422	0.810732402542864	0.810641335640559	0.810542993580162	0.810437378713252	0.810324493565259	0.810204340835401	0.8100769233966	0.809942244295405	0.809800306751901	0.80965111415962	0.809494670085446	0.809330978269506	0.809160042625074	0.808981867238448	0.808796456368844	0.808603814448267	0.808403946081387	0.808196856045407	0.80798254928993	0.807761030936811	0.807532306280014	0.807296380785465	0.807053260090885	0.806802950005641	0.806545456510568	0.806280785757807	0.806008944070622	0.805729937943224	0.805443774040581	0.805150459198226	0.804850000422064	0.804542404888171	0.804227679942582	0.803905833101085	0.803576872049005	0.803240804640977	0.802897638900728	0.802547383020839	0.802190045362509
0.810207981594942	0.810197059359868	0.810178855925073	0.810153371726044	0.810120607372441	0.810080563648086	0.810033241510937	0.809978642093062	0.809916766700606	0.809847616813756	0.809771194086695	0.809687500347558	0.80959653759838	0.809498308015037	0.809392813947185	0.809280057918194	0.809160042625074	0.809032770938399	0.808898245902227	0.808756470734011	0.808607448824508	0.808451183737681	0.8082876792106	0.808116939153333	0.807938967648835	0.807753768952833	0.807561347493699	0.807361707872332	0.807154854862018	0.806940793408301	0.806719528628834	0.806491065813239	0.806255410422952	0.806012568091066	0.805762544622173	0.805505345992195	0.805240978348213	0.80496944800829	0.804690761461291	0.804404925366698	0.804111946554413	0.803811832024567	0.803504588947318	0.803190224662643	0.802868746680126	0.802540162678744	0.802204480506645	0.80186170818092	0.801511853887374	0.801154925980287
0.809156406044597	0.809145496390195	0.809127313922948	0.809101859077984	0.809069132464463	0.809029134865561	0.808981867238448	0.808927330714261	0.80886552659807	0.808796456368844	0.808720121679405	0.808636524356383	0.808545666400164	0.808447549984833	0.808342177458113	0.808229551341292	0.808109674329162	0.80798254928993	0.807848179265146	0.807706567469611	0.807557717291286	0.807401632291196	0.807238316203327	0.807067772934522	0.806890006564366	0.806705021345071	0.806512821701356	0.806313412230316	0.806106797701294	0.805892983055746	0.805671973407093	0.805443774040581	0.805208390413126	0.804965828153161	0.804716093060468	0.804459191106019	0.804195128431799	0.803923911350634	0.803645546346006	0.803360040071867	0.803067399352452	0.802767631182075	0.802460742724934	0.802146741314902	0.801825634455318	0.801497429818764	0.801162135246854	0.800819758749997	0.800470308507172	0.800113792865691
0.8080987772016	0.808087880204472	0.808069718832441	0.808044293520275	0.808011604876628	0.807971653684026	0.807924440898847	0.807869967651289	0.80780823524534	0.807739245158741	0.807662999042944	0.807579498723063	0.807488746197825	0.80739074363951	0.80728549339389	0.807172997980165	0.807053260090885	0.806926282591878	0.806792068522166	0.806650621093879	0.806501943692163	0.806346039875082	0.806182913373519	0.806012568091066	0.805835008103916	0.805650237660741	0.805458261182578	0.805259083262694	0.805052708666461	0.804839142331214	0.804618389366116	0.804390455052004	0.804155344841244	0.80391306435757	0.803663619395925	0.803407015922294	0.803143260073532	0.802872358157186	0.802594316651318	0.802309142204314	0.802016841634697	0.801717421930926	0.801410890251196	0.801097253923233	0.800776520444083	0.800448697479893	0.800113792865691	0.79977181460516	0.799422770870405	0.799066670001718
0.807035119362156	0.807024235098685	0.807006094949174	0.806980699348027	0.806948048903389	0.806908144397134	0.806860986784837	0.806806577195755	0.806744916932783	0.806676007472428	0.806599850464761	0.80651644773337	0.806425801275309	0.806327913261042	0.80622278603438	0.806110422112412	0.805990824185436	0.805863995116881	0.805729937943224	0.805588655873906	0.805440152291237	0.805284430750301	0.805121494978853	0.804951348877214	0.804773996518158	0.804589442146795	0.80439769018045	0.804198745208538	0.803992611992428	0.803779295465312	0.803558800732057	0.803331133069065	0.803096297924116	0.802854300916216	0.802605147835432	0.802348844642726	0.802085397469787	0.801814812618848	0.801537096562511	0.801252255943557	0.800960297574756	0.80066122843867	0.800355055687449	0.80004178664263	0.799721428794922	0.799393989803987	0.799059477498226	0.798717899874544	0.798369265098126	0.798013581502195
0.805965456953857	0.805954585500205	0.805936466700151	0.805911100987729	0.805878488970575	0.805838631429902	0.805791529320483	0.805737183770619	0.805675596082112	0.805606767730222	0.80553070036363	0.805447395804386	0.805356856047863	0.805259083262694	0.805154079790713	0.805041848146886	0.804922391019242	0.804795711268794	0.804661811929458	0.804520696207965	0.804372367483769	0.804216829308953	0.804054085408122	0.803884139678304	0.803706996188829	0.803522659181219	0.803331133069065	0.803132422437898	0.80292653204506	0.802713466819565	0.80249323186196	0.802265832444177	0.80203127400938	0.801789562171812	0.801540702716629	0.801284701599738	0.801021564947622	0.800751299057165	0.800473910395471	0.800189405599675	0.799897791476754	0.799599075003331	0.799293263325471	0.798980363758476	0.798660383786673	0.798333331063197	0.797999213409772	0.797658038816481	0.797309815441537	0.796954551611046
0.804889814534939	0.804878955967048	0.804860858643015	0.804835522996508	0.804802949634646	0.804763139337979	0.804716093060468	0.804661811929458	0.804600297245644	0.804531550483034	0.804455573288908	0.804372367483769	0.804281935061294	0.804184278188273	0.80407939920455	0.803967300622954	0.803847985129228	0.803721455581954	0.803587715012465	0.803446766624766	0.803298613795435	0.803143260073532	0.802980709180492	0.802810965010022	0.802634031627989	0.802449913272301	0.802258614352787	0.802060139451068	0.80185449332043	0.801641680885683	0.801421707243019	0.801194577659872	0.800960297574756	0.800718872597119	0.800470308507172	0.80021461125573	0.799951786964036	0.799681841923585	0.799404782595945	0.799120615612567	0.798829347774595	0.798530986052672	0.798225537586732	0.797913009685801	0.79759340982778	0.797266745659231	0.796933024995154	0.796592255818762	0.796244446281249	0.795889604701553
0.803808216793542	0.803797371187129	0.803779295465312	0.803753990061387	0.803721455581954	0.803681692806895	0.803634702689357	0.803580486355717	0.803519045105558	0.803450380411627	0.803374493919793	0.803291387449001	0.803201062991221	0.803103522711387	0.802998768947339	0.802886804209754	0.802767631182075	0.80264125272043	0.802507671853559	0.802366891782716	0.802218915881587	0.802063747696185	0.801901390944755	0.801731849517661	0.80155512747728	0.801371229057881	0.801180158665506	0.80098192087784	0.800776520444083	0.800563962284811	0.800344251491836	0.800117393328055	0.799883393227307	0.799642256794206	0.799393989803987	0.799138598202337	0.798876088105222	0.798606465798712	0.798329737738799	0.798045910551212	0.797754991031222	0.797456986143447	0.797151903021652	0.796839748968541	0.796520531455545	0.796194258122607	0.795860936777959	0.795520575397894	0.79517318212654	0.794818765275615
0.802720688546958	0.802709855977515	0.802691801983731	0.802666526998531	0.802634031627989	0.802594316651318	0.802547383020839	0.80249323186196	0.802431864473143	0.802363282325864	0.802287487064573	0.802204480506645	0.802114264642331	0.802016841634697	0.801912213819566	0.801800383705446	0.801681353973463	0.80155512747728	0.801421707243019	0.801281096469171	0.801133298526503	0.800978316957965	0.800816155478587	0.800646817975368	0.800470308507172	0.800286631304604	0.80009579076989	0.799897791476754	0.799692638170282	0.799480335766787	0.799260889353667	0.799034304189258	0.798800585702684	0.798559739493698	0.798311771332522	0.798056687159678	0.797794493085822	0.797525195391559	0.797248800527269	0.796965315112917	0.79667474593786	0.796377099960654	0.79607238430885	0.795760606278786	0.79544177333538	0.79511589311191	0.79478297340979	0.794443022198351	0.794096047614602	0.793742057962996
0.801627254740877	0.801616435283669	0.801598403143359	0.801573158752496	0.801540702716629	0.801501035814291	0.801454158996977	0.801400073389118	0.801338780288045	0.801270281163956	0.801194577659872	0.801111671591587	0.801021564947622	0.800924259889162	0.800819758749997	0.800708064036454	0.800589178427325	0.800463104773791	0.800329846099339	0.800189405599675	0.80004178664263	0.799886992768071	0.799725027687787	0.799555895285393	0.799379599616212	0.799196144907161	0.799005535556628	0.798807776134344	0.798602871381254	0.79839082620938	0.798171645701675	0.797945335111882	0.797711899864379	0.797471345554024	0.79722367794599	0.796968902975604	0.79670702674817	0.796438055538794	0.796161995792204	0.795878854122562	0.795588637313272	0.795291352316784	0.794987006254393	0.79467560641603	0.794357160260053	0.794031675413029	0.793699159669513	0.793359620991819	0.793013067509794	0.792659507520572
0.800527940448625	0.800517134178689	0.800499124016915	0.800473910395471	0.800441493919375	0.800401875366481	0.800355055687449	0.800301036005726	0.800239817617507	0.800171401991701	0.80009579076989	0.800012985766278	0.799922988967643	0.799825802533276	0.799721428794922	0.799609870256709	0.799491129595083	0.799365209658723	0.799232113468463	0.799091844217207	0.79894440526983	0.798789800163091	0.798628032605522	0.798459106477326	0.798283025830264	0.798099794887539	0.797909418043673	0.797711899864379	0.797507245086433	0.797295458617534	0.797076545536164	0.796850511091439	0.79661736070296	0.796377099960654	0.796129734624616	0.795875270624936	0.795613714061534	0.79534507120398	0.795069348491309	0.794786552531843	0.794496690102991	0.794199768151057	0.793895793791036	0.793584774306409	0.79326671714893	0.79294162993841	0.792609520462495	0.79227039667644	0.791924266702876	0.791571138831574
0.799422770870405	0.799411977862549	0.799393989803987	0.799368807126506	0.799336430434591	0.799296860505409	0.799250098288781	0.799196144907161	0.799135001655603	0.799066670001718	0.798991151585639	0.798908448219969	0.798818561889731	0.798721494752309	0.798617249137388	0.798505827546887	0.798387232654884	0.798261467307542	0.798128534523025	0.797988437491413	0.797841179574609	0.79768676430624	0.797525195391559	0.797356476707335	0.797180612301744	0.796997606394247	0.796807463375476	0.796610187807099	0.796405784421693	0.796194258122607	0.795975613983819	0.795749857249789	0.795516993335308	0.795277027825341	0.795029966474865	0.794775815208704	0.794514580121355	0.794246267476811	0.793970883708383	0.793688435418508	0.793398929378562	0.793102372528659	0.792798771977456	0.792488135001936	0.792170469047208	0.791845781726279	0.791514080819842	0.791175374276043	0.790829670210251	0.790476976904821
0.798311771332522	0.798300991661322	0.798283025830264	0.798257874270752	0.798225537586732	0.798186016554681	0.798139312123575	0.798085425414872	0.798024357722472	0.797956110512681	0.797880685424174	0.797798084267941	0.797708309027239	0.797611361857532	0.797507245086433	0.797395961213633	0.79727751291083	0.797151903021652	0.797019134561576	0.79687921071784	0.79673213484935	0.796577910486586	0.796416541331498	0.796248031257398	0.79607238430885	0.795889604701553	0.795699696822218	0.795502665228444	0.79529851464858	0.795087249981596	0.794868876296935	0.79464339883437	0.794410823003849	0.794171154385343	0.793924398728679	0.793670561953375	0.79340965014847	0.793141669572346	0.792866626652545	0.792584527985586	0.792295380336768	0.791999190639977	0.791695965997485	0.791385713679738	0.79106844112515	0.790744155939885	0.790412865897632	0.790074578939381	0.789729303173192	0.789377046873955
0.797194967286609	0.797184201026409	0.797166257546759	0.797141137278677	0.79710884082557	0.797069368963215	0.797022722639743	0.796968902975604	0.796907911263539	0.796839748968541	0.796764417727815	0.79668191935073	0.796592255818762	0.796495429285446	0.796391442076307	0.796280296688792	0.796161995792204	0.79603654222762	0.795903939007811	0.795764189317154	0.795617296511541	0.79546326411828	0.795302095835997	0.795133795534523	0.794958367254789	0.794775815208704	0.794586143779035	0.794389357519281	0.794185461153537	0.793974459576364	0.793756357852641	0.793531161217422	0.793298875075781	0.793059505002659	0.792813056742698	0.792559536210078	0.792298949488344	0.792031302830227	0.791756602657465	0.791474855560614	0.791186068298861	0.79089024779982	0.790587401159335	0.790277535641273	0.789960658677311	0.789636777866718	0.789305900976137	0.788968035939355	0.788623190857072	0.788271373996664
0.79607238430885	0.796061631533758	0.79604371052903	0.796018621725294	0.795986365725412	0.795946943304462	0.795900355409717	0.795846603160618	0.795785687848737	0.795717610937747	0.795642374063372	0.795559979033347	0.795470427827361	0.795373722597002	0.795269865665692	0.795158859528625	0.79504070685269	0.794915410476396	0.79478297340979	0.79464339883437	0.794496690102991	0.794342850739772	0.794181884439989	0.794013795069974	0.793838586666997	0.793656263439153	0.793466829765238	0.793270290194624	0.793066649447125	0.792855912412864	0.792638084152124	0.79241316989521	0.792181175042289	0.791942105163239	0.791695965997485	0.791442763453831	0.79118250361029	0.790915192713908	0.790640837180579	0.790359443594859	0.790071018709779	0.789775569446641	0.789473102894821	0.78916362631156	0.788847147121753	0.788523672917733	0.788193211459048	0.787855770672233	0.787511358650582	0.787159983653906
0.794944048099192	0.794933308883083	0.794915410476396	0.79489035330937	0.794858137984319	0.794818765275615	0.794772236129671	0.794718551664907	0.794657713171724	0.794589722112461	0.794514580121355	0.794432289004496	0.794342850739772	0.794246267476811	0.794142541536924	0.794031675413029	0.79391367176959	0.793788533442529	0.793656263439153	0.793516864938059	0.793370341289049	0.793216696013028	0.793055932801905	0.792888055518484	0.792713068196353	0.792530975039767	0.792341780423527	0.792145488892849	0.791942105163239	0.79173163412035	0.791514080819842	0.791289450487237	0.791057748517766	0.790818980476208	0.790573152096737	0.790320269282747	0.790060338106684	0.789793364809867	0.78951935580231	0.789238317662532	0.788950257137364	0.788655181141756	0.788353096758573	0.788044011238387	0.787727931999269	0.787404866626567	0.787074822872687	0.786737808656868	0.786393832064947	0.786042901349121
0.793809984480559	0.793799258897066	0.793781383211146	0.793756357852641	0.793724183423314	0.793684860696827	0.793638390618727	0.793584774306409	0.79352401304909	0.79345610830777	0.793381061715189	0.793298875075781	0.79320955036562	0.793113089732364	0.793009495495194	0.792898770144744	0.79278091634303	0.792655936923377	0.792523834890327	0.792384613419564	0.792238275857811	0.792084825722743	0.791924266702876	0.791756602657465	0.791581837616391	0.791399975780045	0.791211021519205	0.791014979374906	0.790811854058316	0.79060165045059	0.790384373602735	0.790160028735459	0.789928621239021	0.789690156673074	0.789444640766502	0.789192079417254	0.788932478692173	0.788665844826817	0.788392184225278	0.788111503459998	0.787823809271571	0.787529108568551	0.787227408427251	0.78691871609153	0.786603038972589	0.786280384648747	0.785950760865223	0.785614175533911	0.785270636733141	0.78492015270745
0.792670219398051	0.792659507520572	0.792641654677745	0.792616661299014	0.792584527985586	0.792545255510412	0.792498844818163	0.792445297025205	0.792384613419564	0.79231679546089	0.792241844780417	0.792159763180912	0.792070552636624	0.791974215293228	0.791870753467761	0.791760169648557	0.791642466495172	0.791517646838309	0.791385713679738	0.791246670192201	0.79110051971933	0.790947265775542	0.790786912045942	0.790619462386213	0.790444920822505	0.790263291551318	0.790074578939381	0.789878787523524	0.789675922010544	0.789465987277073	0.789248988369432	0.789024930503485	0.788793819064488	0.788555659606931	0.788310457854377	0.788058219699295	0.787798951202887	0.787532658594911	0.787259348273503	0.786979026804985	0.786691700923675	0.786397377531691	0.786096063698749	0.785787766661953	0.785472493825588	0.785150252760901	0.784821051205876	0.784484897065013	0.78414179840909	0.783791763474931
0.79152477891815	0.791514080819842	0.791496250942032	0.791471289713767	0.791439197735694	0.791399975780045	0.791353624790614	0.791300145882727	0.791239540343213	0.791171809630366	0.7910969553739	0.791014979374906	0.790925883605797	0.790829670210251	0.790726341503148	0.790615899970506	0.790498348269405	0.790373689227914	0.790241925845004	0.790103061290465	0.789957098904811	0.789804042199184	0.789643894855255	0.789476660725112	0.789302343831149	0.789120948365951	0.788932478692173	0.788736939342408	0.788534335019061	0.788324670594206	0.78810795110945	0.787884181775782	0.787653367973422	0.787415515251664	0.787170629328716	0.78691871609153	0.786659781595633	0.786393832064947	0.786120873891609	0.785840913635784	0.785553958025475	0.785260013956319	0.784959088491395	0.78465118886101	0.784336322462487	0.784014496859955	0.783685719784117	0.783349999132031	0.783007342966876	0.782657759517712
0.790373689227914	0.79036300498169	0.79034519819042	0.790320269282747	0.790288218858758	0.79024904768996	0.790202756719263	0.790149347060949	0.790088820000641	0.790021176995266	0.789946419673013	0.789864549833283	0.789775569446641	0.789679480654756	0.789576285770338	0.789465987277073	0.789348587829551	0.789224090253186	0.789092497544137	0.788953812869218	0.788808039565809	0.788655181141756	0.788495241275271	0.788328223814825	0.788154132779033	0.78797297235654	0.787784746905899	0.787589460955442	0.787387119203149	0.787177726516512	0.786961287932391	0.786737808656868	0.786507294065096	0.786269749701142	0.786025181277821	0.785773594676535	0.785514995947098	0.785249391307557	0.784976787144017	0.784697190010445	0.784410606628484	0.784117043887254	0.783816508843153	0.783509008719645	0.78319455090705	0.782873142962331	0.782544792608865	0.782209507736222	0.781867296399929	0.781518166821237
0.789216976634165	0.789206306312696	0.789188522729081	0.78916362631156	0.789131617659651	0.789092497544137	0.789046266907035	0.788992926861577	0.788932478692173	0.788864923854375	0.788790263974833	0.788708500851253	0.788619636452338	0.788523672917733	0.788420612557966	0.788310457854377	0.788193211459048	0.788068876194722	0.787937455054728	0.787798951202886	0.787653367973422	0.787500708870862	0.787340977569942	0.787174177915488	0.787000313922315	0.786819389775102	0.786631409828274	0.786436378605873	0.78623430080143	0.786025181277821	0.785809025067131	0.785585837370506	0.785355623557998	0.78511838916841	0.784874139909135	0.784622881655988	0.784364620453033	0.784099362512407	0.78382711421414	0.783547882105965	0.783261672903125	0.782968493488181	0.782668350910806	0.782361252387579	0.782047205301773	0.781726217203139	0.781398295807681	0.781063448997433	0.780721684820225	0.780373011489445
0.788054667562676	0.788044011238387	0.788026250983135	0.788001387224752	0.787969420562187	0.787930351765489	0.787884181775782	0.787830911705238	0.787770542837047	0.787703076625376	0.787628514695331	0.787546858842906	0.787458111034933	0.787362273409022	0.787259348273503	0.787149338107356	0.787032245560136	0.786908073451904	0.786776824773137	0.786638502684643	0.786493110517472	0.786340651772813	0.786181130121899	0.786014549405895	0.785840913635784	0.785660226992258	0.785472493825588	0.7852777186555	0.785075906171044	0.784867061230454	0.78465118886101	0.784428294258887	0.784198382789006	0.783961459984875	0.783717531548429	0.783466603349858	0.783208681427444	0.782943771987375	0.782671881403568	0.78239301621748	0.782107183137917	0.781814389040837	0.781514640969149	0.7812079461325	0.780894311907073	0.780573745835362	0.780246255625952	0.779911849153293	0.779570534457468	0.779222319743955
0.786886788557351	0.786876146302422	0.786858409495828	0.786833578564994	0.786801654108296	0.786762636895044	0.786716527865461	0.786663328130656	0.786603038972589	0.786535661844036	0.786461198368544	0.78637965034039	0.786291019724519	0.786195308656496	0.786092519442438	0.785982654558947	0.785865716653044	0.785741708542081	0.78561063321367	0.785472493825588	0.785327293705688	0.785175036351803	0.785015725431639	0.784849364782675	0.784675958412044	0.78449551049642	0.784308025381896	0.784113507583854	0.783911961786837	0.783703392844406	0.783487805779006	0.783265205781812	0.78303559821258	0.782798988599488	0.78255538263898	0.782304786195589	0.782047205301773	0.781782646157736	0.781511115131245	0.781232618757442	0.780947163738654	0.780654756944195	0.780355405410166	0.780049116339243	0.77973589710047	0.779415755229041	0.779088698426074	0.778754734558389	0.778413871658273	0.778066117923244
0.785713366279403	0.785702738165763	0.785685024927711	0.785660226992258	0.785628344957204	0.785589379591117	0.785543331833314	0.785490202793831	0.785429993753393	0.785362706163374	0.785288341645757	0.785206901993085	0.78511838916841	0.785022805305234	0.78492015270745	0.784810433849269	0.784693651375156	0.784569808099744	0.784438907007758	0.784300951253926	0.784155944162885	0.784003889229087	0.783844790116694	0.783678650659474	0.783505474860684	0.78332526689296	0.783138031098186	0.782943771987375	0.782742494240533	0.782534202706523	0.78231890240292	0.782096598515869	0.781867296399929	0.781631001577919	0.78138771974075	0.781137456747268	0.780880218624071	0.78061601156534	0.780344841932652	0.780066716254797	0.779781641227582	0.779489623713637	0.77919067074221	0.778884789508964	0.778571987375761	0.778252271870446	0.777925650686627	0.777592131683445	0.777251722885343	0.77690443248183
0.784534427506519	0.78452381360585	0.784506124055806	0.784481359282984	0.784449519884602	0.784410606628484	0.784364620453033	0.784311562467207	0.784251433950488	0.78418423635284	0.78410997129467	0.784028640566778	0.78394024613031	0.783844790116694	0.783742274827583	0.783632702734785	0.78351607648019	0.783392398875696	0.783261672903125	0.783123901714134	0.782979088630127	0.782827237142152	0.782668350910806	0.782502433766122	0.782329489707459	0.782149522903384	0.781962537691554	0.781768538578581	0.781567530239909	0.781359517519667	0.781144505430538	0.780922499153603	0.780693504038191	0.780457525601726	0.780214569529559	0.779964641674806	0.779707748058173	0.779443894867779	0.779173088458975	0.778895335354158	0.778610642242574	0.778319015980128	0.778020463589175	0.777714992258318	0.777402609342194	0.777083322361256	0.776757139001552	0.776424067114498	0.776084114716644	0.775737289989441
0.783349999132031	0.783339399515763	0.783321733772774	0.783297002329246	0.783265205781812	0.783226344897545	0.78318042061393	0.783127434038841	0.783067386450508	0.783000279297475	0.782926114198565	0.782844892942825	0.782756617489482	0.782661289967878	0.782558912677412	0.782449488087472	0.78233301883736	0.782209507736222	0.782078957762956	0.781941372066133	0.781796753963899	0.781645106943884	0.781486434663092	0.7813207409478	0.781148029793444	0.780968305364502	0.78078157199437	0.780587834185238	0.780387096607954	0.780179364101892	0.779964641674806	0.779742934502683	0.779514247929591	0.779278587467527	0.779035958796245	0.778786367763098	0.778529820382862	0.778266322837558	0.777995881476273	0.777718502814969	0.777434193536294	0.777142960489383	0.776844810689659	0.776539751318621	0.776227789723635	0.775908933417718	0.775583190079311	0.775250567552057	0.774911073844567	0.774564717130182
0.782160108164076	0.782149522903384	0.782131881086078	0.782107183137917	0.782075429654948	0.782036621403487	0.781990759320097	0.781937844511561	0.781877878254846	0.781810861997073	0.781736797355467	0.781655686117315	0.781567530239909	0.781472331850493	0.7813700932462	0.781260816893981	0.781144505430538	0.781021161662243	0.780890788565057	0.780753389284441	0.78060896713527	0.780457525601726	0.780299068337204	0.780133599164202	0.779961122074207	0.779781641227582	0.779595160953439	0.779401685749515	0.77920122028204	0.778993769385597	0.778779338062984	0.778557931485063	0.77832955499061	0.778094214086158	0.777851914445832	0.777602661911188	0.777346462491034	0.777083322361256	0.776813247864637	0.776536245510668	0.776252321975357	0.77596148410103	0.77566373889613	0.775359093535013	0.77504755535773	0.774729131869814	0.774403830742054	0.774071659810275	0.773732627075096	0.773386740701701
0.780964781724748	0.780954210890557	0.780936593117135	0.780911928829821	0.780880218624071	0.78084146326544	0.780795663689562	0.780742821002121	0.78068293647882	0.78061601156534	0.780542047877303	0.780461047200221	0.780373011489445	0.780277942870107	0.780175843637056	0.780066716254797	0.77995056335741	0.77982738774848	0.779697192401011	0.779559980457339	0.779415755229041	0.779264520196837	0.779106279010488	0.778941035488689	0.778768793618957	0.778589557557512	0.778403331629157	0.778210120327149	0.77800992831307	0.777802760416687	0.777588621635808	0.777367517136141	0.777139452251136	0.77690443248183	0.776662463496686	0.776413551131424	0.776157701388851	0.77589492043868	0.775625214617352	0.775348590427847	0.775065054539491	0.774774613787762	0.774477275174083	0.774173045865619	0.773861933195063	0.773543944660418	0.773219087924778	0.772887370816098	0.77254880132696	0.772203387614342
0.779764047049256	0.779753490712231	0.77973589710047	0.779711266638887	0.779679599922342	0.779640897715627	0.779595160953439	0.779542390740359	0.779482588350813	0.779415755229041	0.779341892989047	0.77926100341456	0.779173088458975	0.7790781502453	0.778976191066091	0.778867213383384	0.778751219828627	0.7786282132026	0.778498196475332	0.778361172786013	0.778217145442905	0.778066117923244	0.777908093873134	0.777743077107446	0.777571071609699	0.777392081531949	0.777206111194662	0.77701316508659	0.776813247864637	0.776606364353723	0.77639251954664	0.776171718603908	0.775943966853619	0.775709269791283	0.775467633079663	0.775219062548613	0.774963564194897	0.774701144182021	0.774431808840045	0.774155564665399	0.773872418320688	0.773582376634498	0.773285446601189	0.772981635380695	0.772670950298305	0.77235339884445	0.772028988674477	0.771697727608425	0.771359623630794	0.771014684890301
0.778557931485063	0.778547389715614	0.778529820382862	0.778505223911293	0.778473600895168	0.778434952098509	0.778389278455075	0.778336581068334	0.778276861211431	0.778210120327149	0.778136360027872	0.77805558209553	0.777967788481554	0.777872981306813	0.777771162861554	0.777662335605335	0.777546502166953	0.777423665344365	0.777293828104607	0.777156993583707	0.77701316508659	0.776862346086986	0.776704540227323	0.776539751318621	0.776367983340381	0.776189240440468	0.776003526934985	0.775810847308151	0.775611206212165	0.775404608467071	0.775191059060615	0.774970563148096	0.774743126052219	0.77450875326293	0.774267450437263	0.774019223399163	0.773764078139323	0.773502020814999	0.773233057749836	0.772957195433671	0.772674440522349	0.772384799837522	0.772088280366448	0.771784889261784	0.77147463384137	0.771157521588019	0.770833560149287	0.770502757337252	0.770165121128277	0.769820659662776
0.777346462491034	0.777335935359312	0.777318390422484	0.777293828104607	0.777262248999341	0.777223653869932	0.777178043649194	0.777125419439476	0.777065782512633	0.776999134309988	0.776925476442288	0.776844810689659	0.776757139001552	0.776662463496686	0.776560786462986	0.776452110357516	0.776336437806406	0.776213771604773	0.776084114716644	0.775947470274863	0.775803841581001	0.77565323210526	0.775495645486368	0.775331085531474	0.775159556216036	0.774981061683701	0.774795606246186	0.774603194383148	0.774403830742054	0.774197520138043	0.773984267553782	0.773764078139323	0.773536957211945	0.773302910256004	0.773061942922764	0.772814061030233	0.77255927056299	0.772297577672009	0.772028988674477	0.771753510053602	0.771471148458428	0.771181910703634	0.770885803769329	0.770582834800851	0.77027301110855	0.769956340167573	0.769632829617639	0.769302487262816	0.768965321071285	0.768621339175105
0.776129667636568	0.776119155212463	0.776101634788043	0.77607710678693	0.776045571802178	0.776007030596258	0.77596148410103	0.775908933417718	0.775849379816879	0.775782824738366	0.775709269791283	0.775628716753937	0.775541167573789	0.775446624367397	0.775345089420349	0.775236565187198	0.775121054291393	0.774998559525195	0.774869083849603	0.774732630394258	0.774589202457357	0.774438803505552	0.774281437173853	0.774117107265511	0.773945817751918	0.77376757277248	0.773582376634498	0.773390233813042	0.77319114895082	0.772985126858034	0.772772172512246	0.772552291058225	0.772325487807798	0.772091768239692	0.771851137999369	0.771603602898864	0.771349168916608	0.771087842197254	0.770819629051493	0.770544535955866	0.770262569552575	0.769973736649281	0.769678044218908	0.769375499399429	0.769066109493658	0.768749881969032	0.768426824457388	0.768096944754735	0.767760250821025	0.767416750779911
0.774907574600734	0.774897076953875	0.774879581157907	0.774855087636018	0.774823596980654	0.774785109953501	0.77473962748546	0.774687150676628	0.774627680796254	0.774561219282711	0.77448776774345	0.77440732795495	0.774319901862672	0.774225491580995	0.774124099393159	0.774015727751193	0.773900379275846	0.773778056756509	0.773648763151132	0.773512501586136	0.773369275356324	0.773219087924778	0.773061942922764	0.772897844149617	0.772726795572636	0.77254880132696	0.772363865715452	0.772171993208567	0.771973188444221	0.771767456227656	0.771554801531295	0.771335229494595	0.771108745423897	0.770875354792267	0.770635063239332	0.770387876571117	0.770133800759869	0.769872841943883	0.769605006427316	0.769330300680002	0.76904873133726	0.768760305199697	0.768465029233002	0.768162910567745	0.767853956499159	0.767538174486925	0.767215572154951	0.766886157291141	0.766549937847168	0.766206921938232
0.773680211171395	0.773669728371147	0.773652257319238	0.77362779843842	0.773596352320525	0.77355791972645	0.773512501586136	0.77346009899854	0.773400713231598	0.773334345722195	0.773260998076118	0.77318067206801	0.773093369641315	0.772999092908226	0.772897844149617	0.77278962581498	0.772674440522349	0.772552291058225	0.772423180377494	0.772287111603338	0.772144088027143	0.771994113108404	0.771837190474619	0.771673323921184	0.771502517411281	0.771324775075759	0.771140101213014	0.770948500288858	0.770749976936393	0.770544535955866	0.770332182314533	0.770112921146508	0.769886757752614	0.769653697600222	0.76941374632309	0.769166909721198	0.768913193760574	0.768652604573116	0.76838514845641	0.768110831873543	0.767829661452912	0.767541643988026	0.767246786437301	0.766945095923857	0.766636579735302	0.766321245323518	0.765999100304436	0.76567015245781	0.765334409726983	0.764991880218653
0.772447605244333	0.772437137359795	0.772419691167112	0.772395267088592	0.772363865715452	0.772325487807798	0.772280134294601	0.772227806273672	0.77216850501163	0.77210223194386	0.772028988674477	0.771948776976273	0.771861598790669	0.771767456227656	0.77166635156573	0.771558287251829	0.771443265901257	0.771321290297609	0.771192363392689	0.77105648830642	0.770913668326753	0.770763906909572	0.770607207678588	0.770443574425234	0.770273011108551	0.770095521855072	0.7699111109587	0.76971978288058	0.769521542248967	0.769316393859089	0.769104342673001	0.768885393819446	0.768659552593693	0.768426824457388	0.768187215038385	0.767940730130586	0.767687375693759	0.76742715785337	0.767160082900397	0.766886157291141	0.766605387647036	0.766317780754451	0.766023343564487	0.765722083192771	0.765414006919243	0.76509912218794	0.764777436606769	0.764448957947285	0.764113694144458	0.76377165329643
0.771209784822364	0.771199331922371	0.771181910703634	0.771157521588019	0.771126165166123	0.771087842197254	0.77104255360941	0.77099030049925	0.770931084132064	0.770864905941733	0.770791767530687	0.77071167066986	0.770624617298636	0.770530609524789	0.770429649624427	0.770321740041916	0.770206883389818	0.770085082448802	0.769956340167573	0.769820659662776	0.769678044218908	0.76952849728822	0.769372022490614	0.769208623613536	0.769038304611864	0.768861069607791	0.768676922890699	0.768485868917039	0.768287912310192	0.768083057860334	0.767871310524296	0.767652675425412	0.76742715785337	0.767194763264056	0.766955497279386	0.766709365687144	0.76645637444081	0.766196529659379	0.765929837627179	0.765656304793687	0.765375937773334	0.765088743345309	0.764794728453356	0.764493900205566	0.764186265874165	0.763871832895298	0.763550608868807	0.763222601557998	0.762887818889418	0.762546268952609
0.769966778014455	0.769956340167573	0.769938944037057	0.769914590044329	0.769883278779361	0.76984501100066	0.769799787635244	0.769747609778614	0.769688478694724	0.76962239581594	0.769549362743001	0.76946938124497	0.769382453259181	0.769288580891182	0.769187766414674	0.769080012271443	0.768965321071285	0.768843695591933	0.768715138778972	0.76857965374575	0.768437243773291	0.768287912310192	0.768131662972524	0.767968499543724	0.767798425974481	0.767621446382622	0.767437565052987	0.767246786437301	0.767049115154045	0.766844555988316	0.766633113891686	0.766414793982053	0.76618960154349	0.765957542026089	0.765718621045796	0.765472844384245	0.765220217988585	0.764960747971304	0.764694440610046	0.764421302347423	0.764141339790822	0.763854559712212	0.763560969047935	0.763260574898505	0.762953384528391	0.7626394053658	0.76231864500246	0.761991111193386	0.761656811856649	0.761315755073143
0.768718613034829	0.768708190309355	0.768690819380887	0.768666500670398	0.768635234767235	0.768597022429097	0.768551864582017	0.768499762320332	0.768440716906651	0.768374729771818	0.76830180251487	0.768221936902988	0.768135134871445	0.76804139852355	0.767940730130586	0.767833132131738	0.767718607134027	0.767597157912227	0.767468787408789	0.767333498733745	0.767191295164625	0.767042180146351	0.766886157291141	0.7667232303784	0.766553403354607	0.766376680333194	0.766193065594433	0.766002563585299	0.765805178919344	0.765600916376556	0.765389780903217	0.765171777611761	0.764946911780612	0.764715188854036	0.764476614441973	0.764231194319871	0.763978934428516	0.76371984087385	0.763453919926793	0.763181178023055	0.762901621762939	0.76261525791115	0.762322093396591	0.76202213531215	0.761715390914497	0.761401867623859	0.761081573023801	0.760754514860998	0.760420701045	0.760080139648002
0.767465318202073	0.767454910666033	0.767437565052987	0.767413281783459	0.767382061446163	0.767343904797991	0.767298812763981	0.767246786437301	0.767187827079208	0.767121936119015	0.767049115154045	0.766969365949589	0.766882690438847	0.766789090722875	0.766688569070524	0.766581127918366	0.766466769870627	0.766345497699111	0.76621731434311	0.766082222909327	0.765940226671773	0.765791329071679	0.765635533717387	0.765472844384245	0.765303265014497	0.76512679971716	0.764943452767908	0.76475322860894	0.76455613184885	0.764352167262489	0.764141339790823	0.763923654540782	0.763699116785116	0.76346773196223	0.763229505676024	0.762984443695725	0.762732551955718	0.762473836555364	0.762208303758822	0.761935959994856	0.761656811856649	0.761370866101603	0.761078129651132	0.760778609590464	0.76047231316842	0.760159247797202	0.759839421052168	0.759512840671604	0.759179514556494	0.758839450770282
0.766206921938232	0.766196529659379	0.766179209474676	0.766154961804194	0.766123787236014	0.766085686526209	0.766040660598825	0.765988710545848	0.765929837627179	0.765864043270588	0.765791329071679	0.765711696793838	0.765625148368182	0.765531685893503	0.765431311636202	0.765324028030225	0.765209837676991	0.765088743345309	0.764960747971304	0.764825854658323	0.764684066676844	0.764535387464382	0.764379820625381	0.764217369931113	0.764048039319559	0.763871832895298	0.763688754929381	0.763498809859202	0.76330200228837	0.76309833698657	0.762887818889418	0.762670453098318	0.762446244880307	0.762215199667896	0.761977323058912	0.761732620816328	0.76148109886809	0.761222763306941	0.76095762039024	0.76068567653977	0.76040693834155	0.760121412545635	0.759829106065917	0.759530025979912	0.759224179528553	0.75891157411597	0.758592217309267	0.758266116838297	0.757933280595427	0.757593716635302
0.764943452767908	0.764933075813722	0.764915781169826	0.764891569255837	0.764860440659197	0.76482239613516	0.764777436606769	0.764725563164826	0.764666777067863	0.764601079742104	0.764528472781421	0.764448957947285	0.764362537168719	0.764269212542235	0.764168986331776	0.764061860968644	0.763947839051433	0.763826923345946	0.763699116785116	0.76356442246892	0.763422843664282	0.763274383804979	0.763119046491538	0.762956835491128	0.762787754737448	0.76261180833061	0.762429000537016	0.762239335789231	0.762042818685849	0.76183945399136	0.761629246636002	0.761412201715619	0.761188324491502	0.76095762039024	0.760720095003551	0.760475754088116	0.760224603565409	0.759966649521519	0.759701898206963	0.759430356036505	0.759152029588961	0.758866925607001	0.758575050996945	0.758276412828561	0.757971018334847	0.757658874911816	0.757339990118274	0.757014371675591	0.756682027467469	0.756342965539707
0.763674939317348	0.763664577755032	0.76364730876395	0.763623132763259	0.763592050339758	0.763554062247879	0.763509169409655	0.763457372914698	0.763398674020166	0.763333074150725	0.763260574898505	0.763181178023055	0.763094885451288	0.763001699277427	0.762901621762939	0.762794655336471	0.762680802593773	0.762560066297628	0.76243244937776	0.762297954930753	0.76215658621996	0.7620083466754	0.761853239893658	0.761691269637779	0.761522439837156	0.761346754587409	0.761164218150265	0.760974834953432	0.760778609590464	0.760575546820624	0.760365651568744	0.760148928925073	0.759925384145132	0.759695022649547	0.759457850023896	0.759213872018534	0.758963094548426	0.758705523692967	0.7584411656958	0.758170026964627	0.757892114071022	0.757607433750227	0.757315992900952	0.75701779858517	0.756712858027902	0.756401178616998	0.75608276790292	0.755757633598508	0.755425783578752	0.755087225880554
0.762401410313529	0.762391064210013	0.762373820983289	0.762349681052052	0.76231864500246	0.762280713588114	0.762235887730032	0.762184168516632	0.762125557203686	0.762060055214296	0.761987664138839	0.761908385734932	0.761822221927367	0.761729174808064	0.761629246636002	0.761522439837156	0.761408757004421	0.761288200897535	0.761160774443	0.761026480733991	0.760885323030265	0.760737304758063	0.760582429510009	0.760420701045	0.760252123288098	0.760076700330405	0.759894436428951	0.759705336006557	0.759509403651708	0.759306644118415	0.759097062326069	0.7588806633593	0.758657452467819	0.758427435066262	0.75819061673403	0.757947003215118	0.757696600417946	0.757439414415178	0.757175451443544	0.756904717903647	0.756627220359776	0.756342965539707	0.756051960334496	0.755754211798278	0.755449727148053	0.755138513763465	0.754820579186583	0.754495931121673	0.754164577434963	0.75382652615441
0.761122894583243	0.761112564005175	0.761095346653888	0.761071242947617	0.761040253471868	0.761002378979408	0.76095762039024	0.760905978791573	0.760847455437792	0.760782051750423	0.760709769318083	0.760630609896443	0.760544575408165	0.760451667942851	0.760351889756981	0.76024524327384	0.760131731083453	0.7600113559425	0.759884120774239	0.759750028668418	0.759609082881179	0.759461286834965	0.759306644118415	0.759145158486256	0.758976833859193	0.758801674323791	0.758619684132351	0.758430867702783	0.758235229618475	0.758032774628155	0.757823507645747	0.757607433750227	0.757384558185466	0.757154886360077	0.756918423847249	0.756675176384583	0.756425149873917	0.756168350381149	0.755904784136055	0.755634457532102	0.755357377126255	0.75507354963878	0.754782981953039	0.754485681115287	0.754181654334457	0.753870908981942	0.753553452591374	0.753229292858394	0.752898437640424	0.752560894956424
0.759839421052168	0.759829106065917	0.759811914700683	0.759787847374233	0.759756904671422	0.759719087344179	0.75967439631148	0.759622832659326	0.759564397640704	0.759499092675554	0.759426919350727	0.759347879419933	0.759261974803695	0.759169207589285	0.759069580030667	0.758963094548426	0.758849753729696	0.758729560328085	0.758602517263591	0.758468627622512	0.758327894657358	0.758180321786752	0.758025912595326	0.757864670833616	0.757696600417946	0.757521705430316	0.757339990118274	0.757151458894793	0.756956116338135	0.756753967191716	0.756545016363964	0.756329268928168	0.756106730122329	0.755877405349003	0.755641300175136	0.755398420331896	0.755148771714504	0.754892360382056	0.754629192557337	0.754359274626636	0.754082613139556	0.753799214808812	0.75350908651003	0.753212235281541	0.752908668324168	0.752598393001008	0.752281416837208	0.751957747519741	0.751627392897172	0.751290360979418
0.758551018743942	0.758540719415598	0.758523554146562	0.758499523354133	0.758468627622512	0.758430867702783	0.758386244512894	0.758334759137625	0.758276412828561	0.75821120700405	0.75813914324916	0.758060223315638	0.75797444912185	0.757881822752728	0.757782346459705	0.757676022660651	0.757562853939796	0.757442843047657	0.757315992900952	0.757182306582515	0.757041787341202	0.756894438591795	0.756740263914898	0.75657926705683	0.756411451929514	0.756236822610358	0.756055383342133	0.755867138532846	0.755672092755606	0.75547025074849	0.755261617414395	0.755046197820898	0.754823997200095	0.754595020948452	0.754359274626636	0.754116763959352	0.753867494835166	0.753611473306333	0.753348705588611	0.753079198061073	0.752802957265918	0.752519989908269	0.752230302855975	0.7519339031394	0.751630797951213	0.75132099464617	0.751004500740888	0.750681323913624	0.750351472004036	0.750014953012952
0.757257716779235	0.757247433174602	0.757230294111439	0.757206300006572	0.757175451443544	0.757137749172591	0.757093194110625	0.757041787341202	0.756983530114495	0.756918423847249	0.756846470122746	0.756767670690752	0.756682027467469	0.756589542535474	0.756490218143657	0.756384056707158	0.756271060807286	0.756151233191451	0.756024576773074	0.755891094631504	0.755750790011926	0.755603666325257	0.755449727148053	0.755288976222395	0.755121417455779	0.754947054920996	0.754765892856015	0.754577935663849	0.754383187912428	0.754181654334457	0.753973339827279	0.753758249452721	0.753536388436946	0.753307762170297	0.753072376207128	0.752830236265644	0.752581348227722	0.752325718138739	0.752063352207388	0.751794256805485	0.751518438467787	0.751235903891786	0.750946659937509	0.750650713627311	0.750348072145664	0.750038742838935	0.749722733215169	0.749400050943857	0.749070703855707	0.748734699942402
0.755959544374804	0.755949276559405	0.755932163811315	0.755908206546888	0.755877405349003	0.755839760967046	0.755795274316886	0.755743946480849	0.755685778707686	0.755620772412534	0.755548929176876	0.75547025074849	0.755384739041399	0.755292396135813	0.755193224278068	0.755087225880554	0.754974403521649	0.754854759945635	0.754728298062621	0.754595020948452	0.754454931844618	0.754308034158157	0.754154331461552	0.753993827492621	0.75382652615441	0.753652431515071	0.753471547807742	0.753283879430418	0.753089430945819	0.752888207081254	0.752680212728475	0.752465452943534	0.752243932946629	0.752015658121942	0.751780634017485	0.751538866344926	0.751290360979418	0.751035123959423	0.750773161486528	0.75050447992526	0.750229085802889	0.749946985809234	0.749658186796461	0.749362695778873	0.749060519932699	0.748751666595876	0.748436143267826	0.748113957609232	0.7477851174418	0.747449630748023
0.754656530842558	0.754646278881628	0.754629192557337	0.754605272285561	0.754574518648515	0.754536932394726	0.754492514439017	0.754441265862476	0.754383187912428	0.75431828200239	0.754246549712037	0.754167992787148	0.754082613139556	0.753990412847093	0.753891394153523	0.753785559468477	0.753672911367379	0.753553452591374	0.753427186047235	0.753294114807287	0.753154242109308	0.75300757135643	0.752854106117044	0.752693850124685	0.752526807277923	0.752352981640245	0.752172377439934	0.751984999069939	0.751790851087743	0.751589938215228	0.751382265338529	0.75116783750789	0.750946659937509	0.750718738005381	0.750484077253137	0.750242683385874	0.749994562271986	0.749739719942982	0.749478162593309	0.749209896580159	0.748934928423281	0.748653264804779	0.748364912568915	0.748069878721897	0.747768170431668	0.747459795027689	0.747144760000717	0.746823073002575	0.746494741845921	0.746159774504011
0.753348705588611	0.753338469547099	0.753321409754852	0.75329752662727	0.753266820745895	0.753229292858394	0.753184943878537	0.75313377488617	0.753075787127179	0.753010982013457	0.752939361122859	0.752860926199156	0.75277567915198	0.752683622056769	0.752584757154703	0.75247908685264	0.752366613723036	0.752247340503876	0.752121270098587	0.75198840557595	0.751848750170012	0.751702307279981	0.751549080470132	0.751389073469693	0.751222290172736	0.75104873463806	0.750868411089063	0.750681323913624	0.75048747766396	0.750286877056498	0.750079526971726	0.749865432454049	0.749644598711633	0.749417031116253	0.749182735203125	0.748941716670742	0.748693981380701	0.748439535357523	0.748178384788475	0.747910536023377	0.747635995574415	0.74735477011594	0.747066866484266	0.746772291677464	0.746471052855148	0.746163157338258	0.745848612608837	0.745527426309804	0.745199606244723	0.744865160377561
0.752036098112329	0.752025878054897	0.75200884490246	0.751984999069939	0.751954341138202	0.751916871854052	0.751872592130199	0.751821503045238	0.751763605843613	0.751698901935582	0.751627392897172	0.751549080470132	0.751463966561882	0.751372053245457	0.751273342759437	0.75116783750789	0.751055540060292	0.750936453151451	0.750810579681427	0.750677922715443	0.75053848548379	0.750392271381735	0.750239283969414	0.750079526971726	0.749913004278221	0.749739719942982	0.749559678184503	0.749372883385559	0.749179340093079	0.748979053018003	0.748772027035142	0.748558267183031	0.748337778663775	0.748110566842894	0.747876637249156	0.747635995574415	0.747388647673434	0.74713459956371	0.746873857425292	0.74660642760059	0.746332316594188	0.74605153107264	0.745764077864274	0.745469963958978	0.745169196507995	0.744861782823698	0.744547730379372	0.744227046808985	0.743899739906957	0.74356581762792
0.750718738005381	0.750708533996397	0.750691527591054	0.750667719203786	0.750637109414786	0.750599698969985	0.75055548878103	0.75050447992526	0.750446673645667	0.750382071350865	0.750310674615044	0.750232485177922	0.750147504944695	0.750055735985978	0.749957180537743	0.749851841001252	0.749739719942982	0.749620820094551	0.749495144352634	0.749362695778873	0.74922347759979	0.749077493206686	0.748924746155536	0.748765240166889	0.748598979125748	0.748425967081457	0.748246208247576	0.748059707001756	0.747866467885604	0.747666495604547	0.747459795027689	0.747246371187666	0.747026229280487	0.746799374665385	0.746565812864647	0.746325549563453	0.746078590609696	0.745824942013813	0.745564609948596	0.745297600749008	0.745023920911989	0.744743577096257	0.74445657612211	0.744162924971214	0.743862630786393	0.743555700871412	0.74324214269075	0.742921963869378	0.742595172192525	0.742261775605438
0.749396654950774	0.749386467054319	0.749369487502865	0.749345716710363	0.749315155256323	0.749277803885802	0.749233663509378	0.749182735203125	0.749125020208579	0.749060519932699	0.748989235947828	0.748911169991645	0.748826323967108	0.748734699942402	0.748636300150875	0.748531126990968	0.748419183026145	0.748300470984816	0.748174993760252	0.748042754410501	0.74790375615829	0.747758002390935	0.747605496660231	0.747446242682351	0.747280244337729	0.747107505670944	0.746928030890599	0.74674182436919	0.746548890642977	0.746349234411846	0.746142860539164	0.745929774051633	0.745709980139139	0.745483484154594	0.74525029161377	0.745010408195137	0.744763839739685	0.744510592250752	0.744250671893837	0.743984084996415	0.743710838047743	0.743430937698663	0.743144390761402	0.74285120420936	0.7425513851769	0.742244940959131	0.741931879011683	0.741612206950483	0.74128593255152	0.740953063750608
0.748069878721897	0.748059707001756	0.748042754410501	0.748019021361592	0.747988508433857	0.747951216371473	0.747907146083943	0.747856298646071	0.747798675297926	0.747734277444807	0.7476631066572	0.747585164670731	0.747500453386112	0.747408974869084	0.747310731350356	0.747205725225536	0.747093959055058	0.746975435564108	0.746850157642535	0.746718128344771	0.746579350889734	0.746433828660732	0.746281565205357	0.746122564235385	0.745956829626656	0.74578436541896	0.745605175815916	0.745419265184841	0.745226638056619	0.745027299125564	0.744821253249277	0.7446085054485	0.744389060906959	0.744162924971214	0.743930103150488	0.743690601116507	0.743444424703322	0.743191579907135	0.742932072886114	0.742665909960208	0.742393097610951	0.74211364248127	0.741827551375276	0.741534831258061	0.741235489255484	0.740929532653955	0.740616968900208	0.740297805601079	0.73997205052327	0.739639711593113
0.746738439181546	0.746728283701212	0.746711358175974	0.746687663018801	0.746657198807833	0.746619966286364	0.746575966362817	0.746525200110717	0.746467668768661	0.746403373740278	0.746332316594188	0.746254499063953	0.746169923048028	0.746078590609696	0.745980503977015	0.745875665542744	0.745764077864274	0.745645743663545	0.745520665826973	0.745388847405352	0.74525029161377	0.745105001831507	0.744952981601932	0.744794234632399	0.744628764794133	0.74445657612211	0.744277672814937	0.744092059234726	0.743899739906957	0.743700719520346	0.743495002926697	0.743282595140758	0.743063501340068	0.7428377268648	0.742605277217595	0.742366158063399	0.74212037522929	0.741867934704295	0.741608842639216	0.741343105346435	0.741070729299727	0.740791721134057	0.740506087645385	0.74021383579045	0.739914972686563	0.739609505611389	0.739297442002722	0.73897878945826	0.738653555735372	0.738321748750858
0.745402366280962	0.74539222710363	0.745375328749734	0.745351671631749	0.745321256327124	0.745284083578264	0.745240154292505	0.745189469542091	0.745132030564136	0.745067838760591	0.744996895698201	0.744919203108455	0.744834762887534	0.744743577096257	0.744645647960013	0.7445409778687	0.744429569376645	0.744311425202534	0.744186548229324	0.744054941504159	0.743916608238273	0.743771551806899	0.743619775749161	0.74346128376797	0.743296079729909	0.743124167665116	0.742945551767163	0.742760236392928	0.742568226062462	0.74236952545885	0.742164139428072	0.741952072978853	0.74173333128251	0.741507919672796	0.74127584364574	0.741037108859471	0.740791721134057	0.740539686451318	0.740281010954647	0.740015700948825	0.739743762899824	0.739465203434611	0.739180029340948	0.738888247567182	0.738589865222033	0.738284889574375	0.737973328053017	0.737655188246472	0.737330477902727	0.736999204929005
0.744061690058845	0.744051567247415	0.744034696169691	0.744011077237653	0.743980711028055	0.743943598282408	0.743899739906957	0.743849136972656	0.743791790715131	0.743727702534646	0.743656873996059	0.743579306828776	0.743495002926697	0.743403964348157	0.74330619331587	0.743201692216851	0.743090463602355	0.742972510187791	0.742847834852643	0.742716440640382	0.742578330758375	0.742433508577783	0.742281977633464	0.742123741623863	0.741958804410898	0.741787170019846	0.741608842639216	0.741423826620626	0.741232126478669	0.741033746890773	0.740828692697062	0.740616968900208	0.740398580665275	0.740173533319565	0.739941832352457	0.739703483415233	0.739458492320913	0.739206865044072	0.738948607720659	0.738683726647814	0.738412228283666	0.738134119247145	0.737849406317774	0.737558096435464	0.737260196700298	0.736955714372319	0.736644656871303	0.736327031776533	0.736002846826566	0.735672109918997
0.742716440640382	0.742706334257455	0.742689490560237	0.742665909960208	0.742635593033424	0.7425985405205	0.742554753326583	0.742504232521331	0.742446979338872	0.742382995177777	0.742312281601007	0.742234840335875	0.742150673273985	0.742059782471181	0.741962170147482	0.741857838687012	0.741746790637933	0.741629028712363	0.741504555786295	0.741373374899511	0.741235489255484	0.74109090222129	0.740939617327496	0.740781638268058	0.740616968900208	0.740445613244333	0.740267575483856	0.74008285996511	0.7398914711972	0.739693413851869	0.739488692763357	0.739277312928249	0.739059279505326	0.738834597815408	0.738603273341188	0.738365311727067	0.738120718778982	0.737869500464226	0.737611662911269	0.737347212409566	0.737076155409369	0.736798498521527	0.736514248517284	0.73622341232807	0.735925997045293	0.735622009920115	0.735311458363236	0.734994349944661	0.734670692393472	0.734340493597588
0.741366648236263	0.741356558344139	0.741339742131258	0.7413162000086	0.74128593255152	0.741248940499729	0.741205224757272	0.741154786392503	0.741097626638048	0.741033746890773	0.740963148711735	0.740885833826141	0.74080180412329	0.74071106165652	0.740613608643143	0.740509447464376	0.740398580665275	0.740281010954647	0.74015674120498	0.740025774452343	0.739888113896303	0.739743762899824	0.739592724989163	0.739435003853764	0.739270603346149	0.739099527481792	0.738921780439004	0.738737366558804	0.738546290344783	0.738348556462972	0.738144169741694	0.737933135171419	0.737715457904615	0.737491143255582	0.737260196700298	0.737022623876247	0.736778430582248	0.736527622778275	0.736270206585279	0.736006188284997	0.735735574319761	0.735458371292298	0.735174585965531	0.734884225262371	0.734587296265502	0.734283806217165	0.733973762518936	0.733657172731497	0.733334044574407	0.733004385925858
0.740012343141685	0.740002269802364	0.739985481177152	0.739961977676525	0.739931759875132	0.739894828511778	0.739851184489402	0.739800828875045	0.739743762899824	0.73967998795889	0.739609505611389	0.73953231758041	0.739448425752936	0.739357832179787	0.739260539075552	0.739156548818531	0.739045863950651	0.7389284871774	0.738804421367736	0.738673669554003	0.738536234931838	0.738392120860073	0.738241330860634	0.738083868618433	0.737919737981253	0.737748942959634	0.737571487726749	0.737387376618275	0.737196614132265	0.736999204929005	0.736795153830873	0.736584465822197	0.736367146049093	0.736143199819316	0.735912632602092	0.735675450027953	0.735431657888564	0.735181262136547	0.734924268885294	0.734660684408785	0.734390515141392	0.734113767677682	0.733830448772216	0.733540565339341	0.733244124452974	0.732941133346392	0.732631599412001	0.732315530201114	0.731992933423718	0.731663816948234
0.738653555735372	0.73864349901055	0.738626738075832	0.738603273341188	0.738573105380559	0.738536234931838	0.738492662896849	0.738442390341319	0.738385418494845	0.738321748750858	0.738251382666579	0.738174321962972	0.738090568524691	0.738000124400023	0.737902991800826	0.737799173102462	0.737688670843721	0.737571487726749	0.737447626616959	0.73731709054295	0.73717988269641	0.737036006432021	0.736885465267355	0.736728262882766	0.73656440312128	0.736393889988475	0.73621672765236	0.736032920443247	0.735842472853619	0.735645389537991	0.735441675312768	0.7352313351561	0.735014374207726	0.734790797768819	0.734560611301821	0.734323820430278	0.734080430938667	0.733830448772216	0.733573880036727	0.73331073099838	0.733041008083551	0.732764717878605	0.732481867129698	0.732192462742572	0.731896511782337	0.731594021473255	0.731284999198521	0.730969452500033	0.730647389078157	0.730318816791496
0.737290316478568	0.737280276429637	0.737263543287732	0.737240117462315	0.737209999526612	0.737173190217603	0.737129690435992	0.737079501246183	0.737022623876247	0.736959059717885	0.736888810326385	0.736811877420574	0.736728262882766	0.736637968758704	0.7365409972575	0.736437350751564	0.736327031776533	0.736210043031192	0.736086387377398	0.735956067839981	0.735819087606663	0.735675450027953	0.735525158617047	0.735368217049723	0.735204629164223	0.73503439896114	0.734857530603293	0.734674028415601	0.734483896884952	0.734287140660059	0.734083764551327	0.733873773530696	0.733657172731497	0.733433967448288	0.733204163136694	0.73296776541324	0.732724780055179	0.732475213000312	0.732219070346809	0.731956358353016	0.73168708343727	0.731411252177694	0.731128871312002	0.730839947737284	0.730544488509798	0.730242500844754	0.729933992116086	0.72961896985623	0.729297441755887	0.72896941566379
0.735922655914044	0.735912632602092	0.735895927354809	0.735872540581148	0.735842472853619	0.735805724908281	0.735762297644713	0.735712192125991	0.735655409578652	0.735591951392658	0.735521819121355	0.735445014481422	0.735361539352821	0.735271395778741	0.735174585965531	0.735071112282636	0.734960977262524	0.734844183600606	0.734720734155159	0.734590631947231	0.734453880160555	0.734310482141449	0.734160441398713	0.734003761603521	0.733840446589311	0.733670500351665	0.733493927048188	0.73331073099838	0.733120916683504	0.732924488746446	0.732721451991577	0.732511811384602	0.732295572052407	0.732072739282906	0.731843318524873	0.731607315387778	0.731364735641614	0.731115585216719	0.730859870203591	0.730597596852708	0.730328771574325	0.730053400938287	0.729771491673819	0.729483050669321	0.729188084972157	0.728886601788435	0.728578608482787	0.72826411257814	0.727943121755482	0.72761564385363
0.734550604665091	0.734540598150896	0.734523920899535	0.734500573319443	0.734470555982414	0.73443386962358	0.734390515141392	0.734340493597588	0.734283806217165	0.734220454388338	0.734150439662501	0.734073763754174	0.733990428540959	0.733900436063473	0.733803788525291	0.73370048829288	0.733590537895521	0.733473940025236	0.733350697536704	0.733220813447172	0.733084290936367	0.732941133346392	0.732791344181629	0.73263492710863	0.732471885956003	0.732302224714295	0.732125947535871	0.731943058734785	0.731753562786649	0.731557464328492	0.731354768158623	0.73114547923648	0.730929602682475	0.730707143777844	0.730478107964477	0.730242500844754	0.730000328181373	0.729751595897172	0.729496310074943	0.729234476957252	0.72896610294624	0.728691194603426	0.728409758649509	0.728121801964157	0.727827331585795	0.727526354711387	0.727218878696217	0.726904911053656	0.726584459454933	0.726257531728901
0.733174193434512	0.733164203778547	0.73314755462389	0.733124246378462	0.733094279613333	0.733057655062707	0.733014373623897	0.732964436357301	0.732907844486367	0.732844599397553	0.732774702640293	0.732698155926939	0.732614961132716	0.732525120295661	0.732428635616563	0.732325509458892	0.732215744348729	0.73209934297469	0.731976308187839	0.731846643001604	0.731710350591684	0.731567434295949	0.731417897614343	0.731261744208769	0.731098977902984	0.730929602682475	0.730753622694343	0.730571042247168	0.730381865810884	0.730186098016636	0.72998374365664	0.729774807684036	0.729559295212733	0.729337211517254	0.729108562032573	0.728873352353946	0.728631588236741	0.728383275596258	0.728128420507547	0.727867029205225	0.727599108083274	0.727324663694855	0.727043702752095	0.726756232125889	0.726462258845679	0.726161790099242	0.725854833232467	0.725541395749126	0.725221485310641	0.724895109735849
0.731793453003612	0.731783480266037	0.731766859308353	0.73174359053796	0.731713674525203	0.731677112003352	0.731633903868578	0.731584051179932	0.731527555159302	0.731464417191388	0.731394638823647	0.731318221766256	0.731235167892052	0.73114547923648	0.731049157997525	0.730946206535651	0.730836627373723	0.73072042319693	0.730597596852708	0.730468151350644	0.730332089862393	0.73018941572157	0.730040132423658	0.729884243625892	0.729721753147152	0.729552664967842	0.729376983229772	0.729194712236023	0.729005856450823	0.728810420499404	0.728608409167862	0.728399827403006	0.728184680312212	0.727962973163258	0.727734711384167	0.727499900563039	0.727258546447874	0.7270106549464	0.726756232125889	0.726495284212966	0.726227817593421	0.725953838812011	0.725673354572255	0.725386371736227	0.725092897324349	0.724792938515163	0.72448650264512	0.724173597208345	0.723854229856408	0.723528408398083
0.730408414231179	0.730398458471846	0.730381865810884	0.730358636655172	0.730328771574325	0.730292271300675	0.730249136729247	0.730199368917735	0.730142969086466	0.730079938618364	0.730010279058909	0.729933992116086	0.729851079660337	0.729761543724498	0.729665386503741	0.729562610355507	0.729453217799428	0.729337211517254	0.729214594352772	0.729085369311712	0.728949539561663	0.728807108431966	0.728658079413622	0.728502456159175	0.728340242482604	0.728171442359208	0.727996059925476	0.727814099478969	0.72762556547818	0.727430462542397	0.727228795451568	0.727020569146143	0.72680578872693	0.726584459454933	0.726356586751191	0.72612217619661	0.72588123353179	0.725633764656851	0.725379775631245	0.725119272673573	0.724852262161391	0.724578750631013	0.724298744777305	0.724012251453486	0.723719277670906	0.723419830598834	0.723113917564236	0.722801546051545	0.722482723702429	0.722157458315556
0.72901910805247	0.729009169330916	0.728992605065904	0.72896941566379	0.728939601693454	0.728903163886286	0.728860103136159	0.728810420499404	0.728754117194779	0.728691194603426	0.728621654268835	0.728545497896791	0.728462727355327	0.728373344674661	0.728277352047137	0.728174751827156	0.728065546531105	0.727949738837279	0.727827331585795	0.727698327778511	0.727562730578928	0.727420543312095	0.727271769464508	0.727116412683997	0.72695447677962	0.726785965721542	0.726610883640911	0.726429234829737	0.72624102374075	0.726046254987272	0.725844933343068	0.725637063742201	0.72542265127888	0.725201701207301	0.724974218941485	0.724740210055113	0.72449968028135	0.724252635512669	0.723999081800667	0.723739025355882	0.723472472547597	0.723199429903641	0.722919904110192	0.722633902011564	0.722341430609999	0.722042497065445	0.721737108695339	0.721425272974376	0.721106997534277	0.720782290163552
0.72762556547818	0.72761564385363	0.727599108083274	0.727575958572941	0.727546195890776	0.727509820767219	0.727466834094988	0.727417236929046	0.727361030486569	0.727298216146914	0.727228795451568	0.727152770104108	0.727070141970146	0.726980913077267	0.726885085614976	0.726782661934622	0.726673644549328	0.726558036133915	0.726435839524819	0.726307057720003	0.726171693878865	0.726029751322137	0.72588123353179	0.72572614415092	0.725564486983637	0.72539626599495	0.725221485310641	0.72504014921714	0.724852262161391	0.724657828750718	0.724456853752676	0.724249342094909	0.724035298864997	0.723814729310295	0.723587638837776	0.723354033013859	0.723113917564236	0.722867298373701	0.722614181485959	0.722354573103446	0.722088479587131	0.721815907456323	0.721536863388465	0.721251354218928	0.720959386940801	0.72066096870467	0.720356106818396	0.72004480874689	0.71972708211188	0.71940293469167
0.726227817593421	0.726217913124785	0.726201405947265	0.726178296466162	0.72614858524888	0.726112273024911	0.726069360685805	0.726019849285153	0.725963740038545	0.725901034323538	0.725831733679614	0.725755839808126	0.725673354572255	0.725584279996944	0.72548861826884	0.725386371736228	0.725277542908952	0.725162134458344	0.72504014921714	0.724911590179389	0.724776460500366	0.724634763496468	0.72448650264512	0.724331681584659	0.724170304114226	0.724002374193648	0.723827895943316	0.723646873644056	0.723459311736997	0.723265214823435	0.723064587664688	0.722857435181952	0.722643762456144	0.722423574727749	0.722196877396655	0.721963676021986	0.721723976321929	0.72147778417356	0.721225105612656	0.720965946833512	0.720700314188746	0.720428214189104	0.720149653503256	0.719864638957588	0.719573177535993	0.719275276379647	0.718970942786795	0.718660184212518	0.718343008268502	0.718019422722801
0.724825895556691	0.72481600830256	0.724799529815528	0.724776460500366	0.724746800923732	0.724710551814163	0.724667714062041	0.724618288719574	0.72456227700076	0.72449968028135	0.724430500098806	0.724354738152253	0.724272396302425	0.724183476571611	0.724087981143591	0.723985912363565	0.723877272738088	0.723762064934985	0.723640291783272	0.72351195627307	0.723377061555509	0.723235610942632	0.723087607907295	0.722933056083054	0.722771959264059	0.722604321404932	0.722430146620645	0.722249439186393	0.722062203537466	0.721868444269102	0.721668166136355	0.721461374053938	0.721248073096079	0.721028268496357	0.720801965647544	0.720569170101436	0.720329887568679	0.720084123918594	0.719831885178993	0.719573177535993	0.719308007333822	0.719036381074624	0.718758305418253	0.71847378718207	0.718182833340726	0.71788545102595	0.71758164752632	0.717271430287043	0.716954806909718	0.716631785152098
0.723419830598834	0.723409960617484	0.723393510918063	0.723370481904809	0.723340874143634	0.723304688362113	0.723261925449454	0.723212586456479	0.723156672595583	0.723094185240705	0.723025125927276	0.722949496352182	0.722867298373701	0.722778534011454	0.722683205446339	0.722581315020463	0.722472865237069	0.722357858760461	0.722236298415922	0.72210818718962	0.721973528228525	0.721832324840305	0.721684580493225	0.721530298816039	0.721369483597882	0.721202138788144	0.721028268496357	0.72084787699206	0.72066096870467	0.720467548223346	0.720267620296843	0.720061189833366	0.71984826190042	0.719628841724647	0.71940293469167	0.719170546345922	0.718931682390473	0.718686348686854	0.718434551254875	0.718176296272438	0.71791159007534	0.717640439157084	0.717362850168668	0.717078829918385	0.716788385371603	0.716491523650557	0.716188252034118	0.71587857795757	0.715562509012379	0.715240052945951
0.722009654022009	0.721999801371394	0.721983380556175	0.721960391980052	0.721930836208189	0.721894713967193	0.721852026145095	0.721802773791321	0.72174695811666	0.721684580493225	0.721615642454412	0.721540145694854	0.721458092070364	0.721369483597882	0.72127432245541	0.721172610981945	0.721064351677408	0.720949547202565	0.720828200378943	0.720700314188746	0.72056589177476	0.720424936440259	0.720277451648896	0.720123441024602	0.719962908351469	0.719795857573639	0.719622292795171	0.719442218279924	0.719255638451419	0.719062557892703	0.718862981346205	0.718656913713592	0.718444360055614	0.718225325591945	0.717999815701026	0.717767835919891	0.717529391944001	0.717284489627062	0.717033134980844	0.716775334174995	0.716511093536844	0.716240419551212	0.715963318860202	0.715679798262995	0.715389864715636	0.71509352533082	0.714790787377666	0.714481658281493	0.714166145623584	0.713844257140953
0.720595397198642	0.720585561936397	0.720569170101436	0.72054622209692	0.720516718487259	0.720480659998091	0.720438047516262	0.720388882089796	0.720333164927868	0.720270897400759	0.720202081039819	0.720126717537417	0.72004480874689	0.719956356682485	0.719861363519295	0.719759831593194	0.719651763400763	0.719537161599212	0.719416029006301	0.719288368600246	0.719154183519634	0.719013477063321	0.718866252690329	0.718712514019742	0.718552264830592	0.718385509061738	0.71821225081175	0.718032494338778	0.717846244060419	0.71765350455358	0.717454280554337	0.717248576957787	0.717036398817893	0.716817751347333	0.716592639917328	0.716361070057485	0.716123047455618	0.71587857795757	0.715627667567037	0.715370322445373	0.715106548911404	0.714836353441227	0.714559742668008	0.714276723381776	0.713987302529211	0.713691487213424	0.713389284693737	0.713080702385457	0.712765747859641	0.712444428842861
0.719177091570384	0.719167273753823	0.719150910994639	0.719128003695455	0.719098552419921	0.719062557892703	0.719020020999454	0.718970942786795	0.718915324462275	0.718853167394335	0.718784473112271	0.718709243306178	0.718627479826905	0.718539184685993	0.718444360055614	0.718343008268502	0.718235131817885	0.718120733357403	0.717999815701026	0.717872381822968	0.717738434857596	0.717597978099329	0.717451015002537	0.717297549181434	0.717137584409966	0.716971124621691	0.716798173909662	0.716618736526292	0.716432816883229	0.716240419551212	0.716041549259935	0.715836210897893	0.715624409512236	0.715406150308607	0.715181438650982	0.7149502800615	0.714712680220296	0.714468644965317	0.714218180292143	0.713961292353803	0.713697987460574	0.713428272079793	0.713152152835649	0.712869636508978	0.712580730037048	0.712285440513346	0.711983775187354	0.71167574146432	0.711361346905027	0.711040599225558
0.717754768647063	0.717744968333174	0.71772863474475	0.717705768283867	0.717676369513416	0.717640439157084	0.717597978099329	0.717548987385358	0.717493468221088	0.717431421973116	0.717362850168668	0.71728775449556	0.717206136802138	0.717117999097226	0.71702334355006	0.716922172490225	0.716814488407577	0.716700293952167	0.716579591934164	0.716452385323759	0.716318677251078	0.716178471006084	0.716031770038474	0.71587857795757	0.71571889853221	0.715552735690627	0.715380093520327	0.715200976267967	0.715015388339214	0.714823334298614	0.714624818869447	0.714419846933581	0.714208423531316	0.713990553861233	0.713766243280027	0.713535497302338	0.713298321600585	0.713054722004783	0.712804704502364	0.712548275237986	0.712285440513346	0.712016206786978	0.711740580674054	0.711458568946173	0.711170178531154	0.710875416512814	0.710574290130749	0.710266806780103	0.709952974011342	0.70963279953001
0.716328460005629	0.716318677251078	0.716302372927852	0.716279547437483	0.716250201342097	0.716214335364398	0.716171950387642	0.716123047455618	0.716067627772604	0.71600569270334	0.715937243772979	0.715862282667041	0.715780811231363	0.715692831472038	0.715598345555356	0.715497355807731	0.715389864715636	0.71527587492552	0.715155389243728	0.715028410636412	0.71489494222944	0.714754987308298	0.714608549317987	0.714455631862917	0.714296238706793	0.714130373772498	0.713958041141973	0.713779245056084	0.713593989914496	0.71340228027553	0.713204120856027	0.712999516531194	0.712788472334455	0.712570993457294	0.712347085249092	0.712116753216957	0.711880003025559	0.711636840496943	0.711387271610355	0.71113130250205	0.710868939465101	0.710600188949203	0.710325057560467	0.710043552061218	0.70975567936978	0.709461446560257	0.709160860862315	0.708853929660951	0.708540660496264	0.708221061063217
0.714898197289098	0.714888432150223	0.714872157186094	0.714849372797692	0.714820079546375	0.71478427815386	0.714741969502198	0.71469315463375	0.71463783475115	0.714576011217272	0.714507685555186	0.714432859448109	0.714351534739353	0.714263713432271	0.714169397690189	0.714068589836342	0.713961292353803	0.7138475078854	0.71372723923364	0.713600489360616	0.71346726138792	0.713327558596539	0.71318138442676	0.713028742478056	0.712869636508978	0.712704070437035	0.712532048338574	0.712353574448649	0.712168653160894	0.71197728902738	0.711779486758476	0.7115752512227	0.711364587446568	0.711147500614437	0.71092399606834	0.710694079307822	0.710457755989764	0.710215031928211	0.709965913094184	0.709710405615496	0.70944851577656	0.709180250018189	0.708905614937398	0.708624617287193	0.708337263976361	0.708043562069251	0.707743518785554	0.707437141500075	0.707124437742501	0.706805415197162
0.713464012205495	0.71345426473831	0.713438019226628	0.713415276070882	0.713386035831657	0.713350299229679	0.713308067145787	0.713259340620909	0.713204120856027	0.713142409212142	0.71307420721023	0.712999516531194	0.712918339015813	0.712830676664684	0.71273653163816	0.712635906256279	0.7125288029987	0.712415224504615	0.712295173572674	0.712168653160894	0.712035666386571	0.711896216526175	0.711750307015255	0.711597941448327	0.711439123578765	0.711273857318679	0.711102146738799	0.71092399606834	0.710739409694877	0.710548392164203	0.710350948180188	0.71014708260463	0.709936800457108	0.709720106914818	0.709497007312414	0.709267507141842	0.709031612052163	0.708789327849384	0.708540660496264	0.708285616112139	0.708024200972722	0.707756421509906	0.707482284311567	0.707201796121353	0.70691496383847	0.70662179451747	0.706322295368025	0.706016473754702	0.705704337196729	0.70538589336776
0.712025936526791	0.712016206786978	0.711999990820549	0.71197728902738	0.711948101967286	0.711912430359992	0.711870275085124	0.711821637182168	0.711766517850447	0.711704918449081	0.711636840496943	0.711562285672612	0.711481255814322	0.711393752919902	0.711299779146717	0.711199336811598	0.711092428390771	0.710979056519777	0.710859223993393	0.710732933765542	0.710600188949203	0.710460992816309	0.710315348797653	0.710163260482769	0.710004731619832	0.709839766115529	0.709668368034948	0.709490541601439	0.709306291196493	0.709115621359595	0.708918536788087	0.708715042337021	0.708505143019003	0.708288844004039	0.708066150619373	0.707837068349316	0.707601602835076	0.707359759874584	0.707111545422304	0.706856965589055	0.706596026641812	0.70632873500351	0.706055097252845	0.705775120124064	0.705488810506754	0.705196175445623	0.704897222140282	0.704591957945014	0.704280390368544	0.703962527073801
0.710584002087835	0.710574290130749	0.710558103801826	0.710535443500389	0.710506309785472	0.710470703375803	0.710428625149782	0.710380076145451	0.710325057560467	0.710263570752058	0.710195617236986	0.710121198691495	0.710040316951264	0.709952974011342	0.709859172026093	0.709758913309124	0.709652200333216	0.709539035730241	0.709419422291087	0.709293362965563	0.709160860862315	0.709021919248718	0.708876541550786	0.708724731353052	0.708566492398466	0.708401828588272	0.708230743981887	0.708053242796775	0.70786932940831	0.707679008349645	0.707482284311567	0.707279162142348	0.707069646847595	0.70685374359009	0.706631457689632	0.706402794622867	0.706167760023115	0.705926359680194	0.705678599540239	0.705424485705513	0.705164024434215	0.704897222140282	0.704624085393191	0.704344620917748	0.704058835593875	0.703766736456397	0.703468330694818	0.703163625653092	0.702852628829395	0.702535347875885
0.709138240785286	0.70912854666595	0.709112390066237	0.709089771384912	0.709060691180229	0.709025150169909	0.708983149231124	0.708934689400468	0.708879771873918	0.708818398006809	0.708750569313778	0.708676287468726	0.708595554304763	0.708508371814149	0.708414742148232	0.708314667617383	0.708208150690919	0.708095193997032	0.707975800322699	0.707849972613601	0.707717713974028	0.707579027666781	0.707433917113071	0.70728238589241	0.707124437742501	0.706960076559117	0.706789306395984	0.706612131464648	0.706428556134348	0.706238584931872	0.706042222541423	0.705839473804464	0.705630343719572	0.705414837442275	0.705192960284895	0.704964717716378	0.70473011536212	0.704489159003795	0.704241854579169	0.703988208181912	0.703728226061411	0.703461914622564	0.70318928042559	0.702910330185811	0.702625070773445	0.702333509213389	0.702035652684995	0.701731508521847	0.701421084211523	0.701104387395364
0.707688684576542	0.707679008349645	0.707662881570292	0.707640304636685	0.707611278106293	0.70757580269583	0.707533879281232	0.707485508897636	0.707430692739338	0.707369432159764	0.707301728671424	0.707227583945862	0.70714699981361	0.707059978264124	0.706966521445724	0.70686663166553	0.706760311389384	0.706647563241775	0.706528390005759	0.706402794622867	0.706270780193016	0.706132349974411	0.70598750738344	0.705836255994572	0.705678599540239	0.705514541910724	0.705344087154032	0.705167239475769	0.704984003239007	0.704794382964148	0.704598383328777	0.704396009167523	0.704187265471899	0.703972157390149	0.703750690227085	0.703522869443918	0.70328870065809	0.703048189643093	0.702801342328286	0.702548164798713	0.702288663294906	0.702022844212691	0.701750714102983	0.701472279671582	0.701187547778959	0.70089652544004	0.700599219823985	0.700295638253956	0.699985788206894	0.699669677313273
0.706235365478662	0.706225707198561	0.70620961033016	0.706187075271099	0.706158102578056	0.706122692966732	0.706080847311826	0.706032566647009	0.705977852164889	0.705916705216976	0.705849127313641	0.705775120124064	0.705694685476185	0.705607825356644	0.705514541910724	0.705414837442275	0.705308714413651	0.705196175445623	0.705077223317306	0.704951860966066	0.704820091487426	0.704681918134975	0.704537344320261	0.704386373612685	0.704229009739386	0.70406525658513	0.70389511819218	0.703718598760177	0.703535702645998	0.703346434363628	0.703150798584012	0.70294880013491	0.702740444000744	0.70252573532244	0.702304679397269	0.702077281678676	0.70184354777611	0.701603483454847	0.701357094635806	0.701104387395365	0.700845367965164	0.700580042731915	0.700308418237194	0.700030501177236	0.699746298402722	0.699455816918566	0.699159063883689	0.698856046610792	0.698546772566127	0.698231249369259
0.704778315567286	0.704768675288004	0.704752608420591	0.70473011536212	0.70470119666848	0.704665853054352	0.704624085393191	0.704575894717198	0.704521282217284	0.704460249243038	0.704392797302679	0.704318928063013	0.704238643349379	0.704151945145591	0.704058835593875	0.703959316994803	0.703853391807222	0.703741062648173	0.703622332292811	0.703497203674316	0.703365679883804	0.703227764170226	0.703083459940266	0.702932770758237	0.702775700345964	0.702612252582671	0.702442431504856	0.702266241306165	0.702083686337258	0.701894771105675	0.701699500275689	0.701497878668164	0.701289911260401	0.701075603185976	0.700854959734586	0.700627986351878	0.700394688639273	0.700155072353796	0.69990914340789	0.699656907869229	0.699398371960526	0.699133542059337	0.698862424697859	0.698585026562722	0.698301354494777	0.698011415488881	0.697715216693673	0.697412765411348	0.697104069097425	0.696789135360511
0.703317566975557	0.70330794475078	0.703291907973829	0.703269457041211	0.703240592508018	0.70320531508791	0.703163625653092	0.703115525234287	0.703061015020704	0.70300009636	0.702932770758237	0.702859039879834	0.702778905547518	0.702692369742262	0.702599434603228	0.702500102427694	0.702394375670983	0.70228225694639	0.702163749025093	0.702038854836073	0.701907577466014	0.701769920159211	0.701625886317465	0.701475479499977	0.701318703423238	0.701155561960904	0.700986059143683	0.700810199159203	0.700627986351878	0.700439425222775	0.70024452042947	0.7000432767859	0.699835699262212	0.699621792984605	0.699401563235167	0.699175015451713	0.698942155227605	0.698702988311581	0.69845752060757	0.698205758174506	0.697947707226137	0.697683374130825	0.697412765411348	0.697135887744689	0.696852747961828	0.696563353047522	0.696267710140085	0.695965826531161	0.695657709665493	0.695343367140681
0.701853151893033	0.70184354777611	0.701827541178535	0.701805132496244	0.701776322283531	0.701741111253029	0.701699500275689	0.701651490380751	0.701597082755712	0.70153627874629	0.70146907985638	0.701395487748005	0.701315504241269	0.701229131314293	0.701136371103158	0.701037225901835	0.700931698162112	0.700819790493518	0.700701505663241	0.70057684659604	0.700445816374152	0.700308418237194	0.700164655582065	0.700014531962834	0.699858051090628	0.69969521683352	0.699526033216399	0.699350504420849	0.699168634785013	0.698980428803459	0.698785891127035	0.698585026562722	0.698377840073485	0.69816433677811	0.697944521951051	0.697718401022251	0.697485979576982	0.697247263355659	0.697002258253662	0.696750970321148	0.696493405762862	0.696229570937932	0.695959472359679	0.695683116695398	0.695400510766156	0.695111661546568	0.694816576164579	0.694515261901238	0.694207726190463	0.693893976618808
0.7003851025646	0.70037551660854	0.700359540278689	0.70033717397041	0.700308418237194	0.700273273790644	0.700231741500451	0.700183822394365	0.700129517658165	0.700068828635621	0.700001756828451	0.699928303896275	0.699848471656559	0.699762262084563	0.699669677313273	0.699570719633339	0.699465391492998	0.699353695497999	0.699235634411521	0.699111211154084	0.698980428803459	0.698843290594569	0.698699799919384	0.698549960326822	0.698393775522627	0.698231249369259	0.698062385885768	0.697887189247668	0.697705663786804	0.697517813991216	0.697323644504997	0.697123160128143	0.696916365816406	0.696703266681131	0.696483867989098	0.696258175162355	0.696026193778044	0.695787929568222	0.695543388419686	0.69529257637378	0.695035499626203	0.694772164526818	0.694502577579443	0.694226745441647	0.693944674924542	0.693656372992558	0.69336184676323	0.693061103506965	0.692754150646814	0.692440995758233
0.69891345128938	0.698903883546854	0.698887937572508	0.698865613761132	0.698836912665412	0.698801834995914	0.698760381621063	0.698712553567115	0.698658352018123	0.698597778315902	0.698530833959983	0.69845752060757	0.698377840073485	0.69829179433011	0.698199385507327	0.698100615892449	0.697995487930147	0.697884004222376	0.697766167528287	0.697641980764145	0.697511447003236	0.697374569475765	0.69723135156876	0.69708179682596	0.696925908947707	0.696763691790823	0.696595149368495	0.69642028585014	0.69623910556128	0.696051612983401	0.695857812753811	0.695657709665493	0.695451308666953	0.695238614862067	0.695019633509909	0.694794370024596	0.694562829975107	0.69432501908511	0.694080943232779	0.693830608450607	0.693574020925216	0.693311186997157	0.693042113160711	0.69276680606368	0.692485272507177	0.692197519445408	0.691903553985451	0.691603383387029	0.69129701506228	0.690984456575517
0.697438230419636	0.697428680942973	0.697412765411348	0.697390484218971	0.69736183791772	0.697326827217123	0.697285452984334	0.697237716244105	0.697183618178758	0.697123160128143	0.697056343589598	0.6969831702179	0.696903641825213	0.696817760381034	0.696725528012124	0.696626947002446	0.696522019793092	0.696410748982203	0.69629313732489	0.696169187733143	0.696038903275742	0.69590228717816	0.695759342822457	0.695610073747175	0.695454483647227	0.69529257637378	0.695124355934127	0.694949826491568	0.694768992365274	0.694581858030147	0.694388428116685	0.694188707410826	0.693982700853806	0.693770413541992	0.693551850726727	0.693327017814161	0.693095920365077	0.692858564094718	0.6926149548726	0.692365098722331	0.692109001821413	0.691846670501051	0.691578111245948	0.691303330694097	0.691022335636574	0.690735133017315	0.6904417299329	0.690142133632325	0.689836351516767	0.689524391139352
0.695959472359679	0.695949941200866	0.695934056198604	0.695911817746524	0.695883226395691	0.695848282854589	0.695806987989096	0.695759342822457	0.695705348535252	0.695645006465361	0.695578318107917	0.695505285115262	0.695425909296891	0.695340192619401	0.695248137206422	0.695149745338554	0.695045019453292	0.69493396214495	0.694816576164579	0.694692864419879	0.694562829975107	0.69442647605098	0.69428380602457	0.694134823429204	0.693979531954342	0.693817935445469	0.693650037903966	0.693475843486986	0.693295356507322	0.693108581433269	0.692915522888484	0.692716185651833	0.692510574657247	0.692298694993559	0.692080551904346	0.691856150787759	0.691625497196351	0.691388596836904	0.691145455570244	0.690896079411052	0.690640474527677	0.690378647241938	0.690110604028919	0.689836351516767	0.689555896486476	0.689269245871672	0.688976406758396	0.688677386384867	0.688372192141262	0.688060831569471
0.694477209564764	0.694467696775444	0.694451842388616	0.694429646797329	0.694401110551832	0.69436623435956	0.69432501908511	0.694277465750213	0.694223575533704	0.694163349771479	0.694096789956459	0.694023897738541	0.693944674924542	0.693859123478145	0.693767245519837	0.69366904332684	0.693564519333037	0.693453676128902	0.693336516461407	0.693213043233944	0.693083259506228	0.692947168494202	0.692804773569931	0.692656078261501	0.6925010862529	0.692339801383906	0.692172227649964	0.691998369202056	0.69181823034657	0.691631815545167	0.691439129414633	0.691240176726735	0.691034962408069	0.690823491539904	0.690605769358016	0.690381801252525	0.690151592767724	0.689915149601896	0.689672477607139	0.689423582789176	0.689168471307163	0.688907149473494	0.688639623753596	0.688365900765727	0.688085987280762	0.687799890221974	0.687507616664817	0.687209173836696	0.686904569116738	0.686593810035555
0.692991474539989	0.692981980171462	0.692966156485565	0.692944003874762	0.692915522888484	0.692880714233113	0.69283957877196	0.692792117525236	0.692738331670019	0.69267822254022	0.692611791626537	0.692539040576409	0.692459971193965	0.692374585439965	0.692282885431736	0.69218487344311	0.692080551904346	0.691969923402056	0.691852990679122	0.691729756634608	0.691600224323669	0.691464396957454	0.691322277903	0.691173870683131	0.691019178976341	0.69085820661668	0.690690957593628	0.690517436051972	0.690337646291672	0.690151592767724	0.689959280090018	0.689760713023191	0.689555896486476	0.689344835553543	0.68912753545234	0.688904001564923	0.688674239427287	0.688438254729186	0.688196053313953	0.687947641178316	0.6876930244722	0.687432209498537	0.687165202713058	0.686892010724092	0.686612640292351	0.686327098330715	0.686035391904009	0.68573752822878	0.68543351467306	0.685123358756136
0.69150229983919	0.691492823942409	0.691477031042362	0.691454921530928	0.691426495956715	0.69139175502505	0.691350699597949	0.691303330694097	0.691249649488813	0.691189657314009	0.691123355658153	0.691050746166218	0.690971830639632	0.690886611036219	0.690795089470136	0.69069726821181	0.690593149687859	0.690482736481022	0.69036603133007	0.690243037129723	0.690113756930558	0.689978193938909	0.689836351516767	0.689688233181671	0.689533842606599	0.689373183619848	0.689206260204911	0.689033076500356	0.688853636799685	0.688667945551204	0.68847600735788	0.68827782697719	0.688073409320974	0.687862759455275	0.687645882600177	0.687422784129641	0.687193469571331	0.686957944606436	0.686716215069491	0.68646828694819	0.686214166383193	0.685953859667927	0.685687373248392	0.685414713722946	0.685135887842099	0.684850902508294	0.684559764775687	0.684262481849917	0.683959061087883	0.683649509997498
0.690009718063833	0.690000260689403	0.689984498659549	0.689962432365559	0.689934062355217	0.689899389332786	0.689858414158989	0.689811137850976	0.689757561582296	0.689697686682859	0.689631514638892	0.689559047092893	0.689480285843576	0.689395232845818	0.689303890210594	0.689206260204911	0.689102345251734	0.688992147929908	0.688875670974082	0.688752917274612	0.688623889877478	0.688488591984181	0.688347026951643	0.6881991982921	0.688045109672989	0.687884764916831	0.687718168001112	0.687545323058149	0.687366234374965	0.68718090639315	0.686989343708715	0.686791551071952	0.686587533387276	0.686377295713073	0.686160843261532	0.685938181398487	0.685709315643236	0.685474251668369	0.685232995299589	0.684985552515519	0.684731929447513	0.684472132379463	0.684206167747591	0.683934042140248	0.6836557622977	0.683371335111912	0.683080767626325	0.682784067035634	0.682481240685553	0.682172296072578
0.688513761861902	0.688504323060081	0.688488591984181	0.688466569024897	0.688438254729186	0.688403649800244	0.688362755097493	0.688315571636543	0.688262100589168	0.688202343283266	0.688136301202812	0.688063975987821	0.687985369434283	0.687900483494116	0.687809320275099	0.687711882040806	0.687608171210532	0.687498190359218	0.687381942217368	0.687259429670961	0.687130655761359	0.686995623685211	0.686854336794351	0.686706798595689	0.686553012751101	0.686392983077308	0.686226713545761	0.686054208282507	0.685875471568061	0.685690507837268	0.68549932167916	0.685301917836812	0.685098301207186	0.684888476840977	0.684672449942453	0.684450225869283	0.684221810132368	0.683987208395667	0.68374642647601	0.683499470342916	0.683246346118399	0.682987060076772	0.682721618644445	0.68245002839972	0.682172296072578	0.681888428544464	0.681598432848064	0.68130231616708	0.681000085836001	0.680691749339862
0.687014463926786	0.687005043747482	0.686989343708715	0.686967364200586	0.686939105769217	0.686904569116738	0.686863755101261	0.686816664736852	0.686763299193503	0.686703659797088	0.686637748029329	0.686565565527739	0.68648711408558	0.686402395651796	0.686311412330958	0.686214166383193	0.686110660224112	0.686000896424734	0.685884877711404	0.685762606965705	0.685634087224365	0.68549932167916	0.685358313676816	0.685211066718895	0.685057584461688	0.684897870716097	0.684731929447513	0.684559764775687	0.684381380974599	0.684196782472324	0.684005973850887	0.683808959846116	0.683605745347491	0.683396335397988	0.683180735193917	0.682958950084754	0.68273098557297	0.682496847313855	0.682256541115334	0.682010072937786	0.681757448893845	0.681498675248209	0.681233758417437	0.680962704969742	0.68068552162478	0.680402215253434	0.680112792877592	0.679817261669922	0.67951562895364	0.679207902202275
0.685511856996164	0.685502455488936	0.685486786569896	0.68546485062855	0.685436648210186	0.685402180015857	0.685361446902364	0.685314449882221	0.685261190123631	0.685201668950439	0.685135887842099	0.685063848433621	0.684985552515519	0.684901002033755	0.68481019908968	0.684713145939959	0.684609844996506	0.684500298826402	0.684384510151817	0.684262481849917	0.68413421695278	0.683999718647291	0.683858990275045	0.683712035332238	0.683558857469553	0.683399460492049	0.683233848359031	0.683062025183931	0.682883995234171	0.682699762931027	0.682509332849486	0.682312709718104	0.68210989841885	0.681900903986949	0.681685731610722	0.681464386631419	0.681236874543047	0.681003200992194	0.680763371777847	0.680517392851205	0.680265270315488	0.68000701042574	0.67974261958863	0.679472104362242	0.679195471455868	0.678912727729785	0.678623880195043	0.678328936013232	0.678027902496251	0.677720787106078
0.684005973850887	0.68399659106494	0.683980953347637	0.683959061087883	0.683930914830128	0.683896515274348	0.683855863276024	0.683808959846116	0.683755806151025	0.683696403512564	0.683630753407909	0.683558857469553	0.683480717485257	0.683396335397988	0.683305713305861	0.683208853462069	0.683105758274811	0.682996430307218	0.682880872277264	0.682759087057687	0.682631077675892	0.682496847313855	0.682356399308019	0.682209737149193	0.682056864482431	0.681897785106924	0.681732502975871	0.681561022196358	0.681383347029221	0.68119948188891	0.681009431343353	0.6808132001138	0.680610793074679	0.680402215253434	0.680187471830367	0.679966568138471	0.679739509663254	0.679506302042568	0.679266951066426	0.679021462676813	0.678769842967496	0.67851209818383	0.678248234722553	0.677978259131582	0.677702178109802	0.677419998506848	0.677131727322884	0.676837371708379	0.676536938963875	0.676230436539751
0.682496847313855	0.682487483298042	0.682471876863896	0.68245002839972	0.682421938449122	0.682387607710995	0.682347037039498	0.682300227444026	0.682247180089178	0.682187896294721	0.682122377535545	0.68205062544162	0.681972641797939	0.681888428544464	0.681797987776061	0.681701321742437	0.681598432848064	0.681489323652101	0.681373996868319	0.681252455365003	0.68112470216487	0.680990740444966	0.680850573536565	0.680704204925064	0.680551638249869	0.680392877304279	0.680227926035363	0.680056788543835	0.679879469083921	0.67969597206322	0.679506302042568	0.679310463735885	0.679108462010028	0.678900301884629	0.678685988531941	0.678465527276663	0.678238923595777	0.678006183118362	0.677767311625422	0.677522315049692	0.677271199475452	0.677013971138327	0.676750636425087	0.676481201873443	0.676205674171831	0.675924060159202	0.675636366824794	0.675342601307913	0.675042770897697	0.674736883032883
0.680984510248895	0.680975165051716	0.680959589981558	0.680937785426119	0.680909751928163	0.680875490185496	0.680835001050949	0.680788285532347	0.680735344792478	0.680676180149056	0.680610793074679	0.680539185196778	0.680461358297573	0.680377314314005	0.680287055337683	0.68019058361481	0.680087901546117	0.679979011686781	0.679863916746345	0.67974261958863	0.679615123231645	0.679481430847486	0.679341545762238	0.679195471455868	0.679043211562108	0.678884769868343	0.678720150315489	0.678549356997864	0.678372394163057	0.67818926621179	0.67799997769778	0.677804533327587	0.677602937960467	0.677395196608214	0.677181314434996	0.676961296757191	0.676735149043216	0.676502876913348	0.676264486139544	0.676019982645256	0.675769372505237	0.675512661945346	0.675249857342348	0.674980965223706	0.67470599226737	0.674424945301563	0.674137831304557	0.673844657404449	0.673545430878932	0.673240159155054
0.679468995559635	0.679459669229235	0.679444125603303	0.679422365068933	0.679394388168039	0.679360195597337	0.679319788208324	0.67927316700725	0.679220333155085	0.679161287967482	0.679096032914735	0.679024569621733	0.678946899867905	0.678863025587164	0.678772948867845	0.67867667195264	0.67857419723852	0.678465527276663	0.678350664772373	0.678229612584985	0.678102373727783	0.677968951367896	0.677829348826199	0.677683569577205	0.677531617248953	0.677373495622893	0.677209208633761	0.677038760369455	0.676862155070901	0.676679397131918	0.676490491099077	0.676295441671549	0.676094253700963	0.675886932191238	0.675673482298431	0.675453909330566	0.675228218747462	0.674996416160558	0.674758507332734	0.674514498178119	0.674264394761905	0.674008203300147	0.673745930159565	0.673477581857336	0.673203165060884	0.672922686587662	0.672636153404934	0.672343572629548	0.672044951527704	0.67174029751472
0.677950336188379	0.677941028772545	0.677925516670485	0.677903800268683	0.677875880108203	0.677841756884664	0.677801431448227	0.677754904803558	0.677702178109802	0.677643252680545	0.67757812998377	0.677506811641808	0.677429299431291	0.677345595283092	0.67725570128226	0.677159619667957	0.677057352833386	0.676948903325709	0.676834273845972	0.67671346724901	0.676586486543363	0.676453334891173	0.676314015608085	0.676168532163138	0.676016888178657	0.67585908743013	0.675695133846094	0.675525031508	0.675348784650087	0.675166397659243	0.674977875074866	0.674783221588713	0.674582442044749	0.674375541438996	0.674162524919366	0.673943397785494	0.673718165488573	0.673486833631169	0.673249407967047	0.673005894400982	0.672756298988564	0.672500627936011	0.672238887599957	0.671971084487255	0.671697225254762	0.671417316709122	0.671131365806548	0.670839379652595	0.670541365501927	0.670237330758088
0.67642856511497	0.676419276661133	0.676403796161994	0.676382124003427	0.67635426072564	0.676320207023154	0.676279963744785	0.676233531893612	0.676180912626948	0.676122107256302	0.676057117247336	0.675985944219819	0.675908589947571	0.675825056358413	0.675735345534096	0.675639459710242	0.675537401276266	0.675429172775303	0.675314776904123	0.675194216513044	0.675067494605843	0.674934614339658	0.674795579024881	0.67465039212506	0.67449905725678	0.67434157818955	0.674177958845677	0.674008203300147	0.673832315780483	0.673650300666618	0.673462162490747	0.673267905937183	0.673067535842205	0.672861057193903	0.672648475132012	0.672429794947751	0.672205022083649	0.671974162133368	0.671737220841524	0.671494204103499	0.671245117965251	0.670989968623117	0.670728762423612	0.670461505863223	0.6701882055882	0.669908868394338	0.669623501226757	0.669332111179676	0.669034705496182	0.668731291567997
0.674903715355665	0.674894445910897	0.674878997093132	0.67485736928763	0.67482956303374	0.674795579024881	0.67475541810852	0.674709081286141	0.67465656971322	0.674597884699181	0.674533027707356	0.674462000354939	0.674384804412932	0.674301441806089	0.674211914612854	0.674116225065291	0.674014375549018	0.673906368603123	0.673792206920085	0.673671893345689	0.673545430878932	0.673412822671925	0.673274072029792	0.673129182410565	0.672978157425071	0.672821000836812	0.672657716561848	0.67248830866867	0.672312781378063	0.672131139062976	0.671943386248377	0.671749527611106	0.671549567979726	0.671343512334363	0.671131365806548	0.67091313367905	0.670688821385702	0.670458434511229	0.670221978791063	0.669979460111159	0.669730884507802	0.669476258167416	0.669215587426355	0.668948878770705	0.668676138836068	0.668397374407347	0.668112592418529	0.667821799952455	0.66752500424059	0.667222212662791
0.673375819961994	0.673366569573009	0.67335115251447	0.673329569171024	0.673301820081158	0.673267905937183	0.673227827585211	0.67318158602513	0.673129182410565	0.673070618048851	0.673005894400982	0.672935013081566	0.672857975858776	0.672774784654289	0.672685441543227	0.672589948754087	0.67248830866867	0.672380523822004	0.672266596902264	0.672146530750681	0.672020328361455	0.671887992881651	0.671749527611106	0.671604936002316	0.671454221660324	0.671297388342608	0.671134439958954	0.670965380571335	0.670790214393772	0.670608945792205	0.670421579284345	0.670228119539534	0.670028571378587	0.66982293977364	0.669611229847987	0.669393446875915	0.66916959628253	0.668939683643584	0.668703714685291	0.668461695284145	0.668213631466725	0.667959529409499	0.667699395438626	0.667433236029749	0.667161057807783	0.666882867546703	0.666598672169316	0.666308478747044	0.666012294499688	0.665710126795195
0.67184491201963	0.671835680732779	0.671820295510719	0.671798756737479	0.671771064950681	0.671737220841524	0.671697225254762	0.671651079188676	0.671598783795039	0.671540340379086	0.671475750399463	0.671405015468186	0.671328137350585	0.671245117965251	0.67115595938397	0.671060663831657	0.670959233686285	0.670851671478808	0.670737979893075	0.670618161765752	0.670492220086218	0.67036015799648	0.670221978791063	0.670077685916907	0.669927282973252	0.669770773711527	0.669608162035223	0.669439451999768	0.669264647812394	0.669083753832007	0.668896774569035	0.668703714685291	0.668504578993816	0.668299372458724	0.668088100195043	0.667870767468545	0.667647379695577	0.667417942442885	0.667182461427432	0.666940942516214	0.666693391726066	0.666439815223467	0.666180219324341	0.66591461049385	0.665642995346184	0.665365380644343	0.665081773299921	0.664792180372874	0.664496609071297	0.664195066751183
0.670311024647244	0.670301812508519	0.670286459199587	0.670264965103859	0.670237330758088	0.670203556852358	0.670163644230058	0.670117593887857	0.670065406975671	0.670007084796624	0.669942628807008	0.669872040616234	0.669795321986783	0.669712474834144	0.669623501226757	0.669528403385942	0.669427183685829	0.66931984465328	0.669206388967808	0.66908681946149	0.668961139118874	0.668829351076883	0.668691458624714	0.66854746520373	0.668397374407347	0.668241189980921	0.668078915821624	0.667910555978316	0.667736114651417	0.667555596192768	0.667369005105491	0.667176346043841	0.666977623813055	0.666772843369197	0.666562009818997	0.666345128419681	0.666122204578806	0.665893243854077	0.665658251953172	0.665417234733554	0.665170198202278	0.664917148515798	0.664658091979765	0.664393035048822	0.664121984326391	0.663844946564463	0.663561928663369	0.663272937671565	0.662977980785392	0.662677065348848
0.668774190995369	0.668764998050396	0.668749676730638	0.668728227418881	0.668700650651009	0.668666947115984	0.668627117655828	0.668581163265591	0.668529085093322	0.668470884440029	0.668406562759642	0.668336121658957	0.668259562897592	0.668176888387928	0.668088100195043	0.667993200536649	0.66789219178302	0.667785076456911	0.667671857233482	0.667552536940205	0.667427118556778	0.667295605215023	0.667158000198787	0.667014306943836	0.66686452903774	0.666708670219762	0.666546734380729	0.666378725562912	0.666204647959891	0.666024505916418	0.66583830392828	0.665646046642146	0.665447738855423	0.665243385516095	0.66503299172256	0.664816562723471	0.664594103917558	0.664365620853457	0.664131119229524	0.663890604893654	0.663644083843087	0.663391562224215	0.663133046332378	0.66286854261166	0.662598057654679	0.662321598202373	0.662039171143775	0.661750783515791	0.661456442502971	0.66115615543727
0.667234444245254	0.667225270539298	0.667209981284152	0.667188576861978	0.667161057807783	0.667127424809409	0.667087678707501	0.667041820495487	0.666989851319541	0.666931772478549	0.666867585424065	0.666797291760266	0.666720893243896	0.666638391784212	0.666549789442923	0.666455088434118	0.666354291124198	0.6662474000318	0.666134417827712	0.666015347334786	0.665890191527851	0.665758953533608	0.665621636630539	0.665478244248789	0.665328779970063	0.665173247527505	0.665011650805577	0.664843993839934	0.664670280817291	0.664490516075289	0.66430470410235	0.664112849537532	0.663914957170379	0.663711031940767	0.663501078938735	0.663285103404328	0.663063110727419	0.662835106447538	0.662601096253689	0.662361085984164	0.662115081626351	0.661863089316543	0.661605115339731	0.661341166129404	0.661071248267337	0.660795368483371	0.660513533655202	0.660225750808146	0.659932027114916	0.659632369895384
0.665691817607722	0.665682663185682	0.665667406069979	0.665646046642146	0.665618585436316	0.6655850231392	0.665545360590065	0.665499598780708	0.665447738855424	0.665389782110967	0.665325729996511	0.665255584113598	0.665179346216091	0.665097018210113	0.665008602153987	0.664914100258169	0.664813514885174	0.664706848549504	0.664594103917558	0.664475283807555	0.664350391189433	0.664219429184758	0.664082401066621	0.663939310259531	0.663790160339303	0.663634955032943	0.663473698218523	0.66330639392506	0.663133046332378	0.662953659770978	0.662768238721892	0.662576787816541	0.662379311836579	0.662175815713739	0.661966304529675	0.661750783515791	0.661529258053072	0.66130173367191	0.66106821605192	0.660828711021757	0.660583224558923	0.660331762789574	0.660074331988317	0.659810938578005	0.65954158912953	0.659266290361601	0.65898504914053	0.658697872480006	0.65840476754086	0.658105741630837
0.664146344322021	0.664137209228431	0.664121984326391	0.664100669996807	0.66407326677293	0.664039775340338	0.664000196536914	0.663954531352821	0.663902780930465	0.663844946564463	0.663781029701596	0.663711031940767	0.663634955032943	0.663552800881103	0.663464571540174	0.663370269216964	0.663269896270088	0.663163455209896	0.663050948698387	0.662932379549123	0.66280775072714	0.662677065348848	0.662540326681928	0.662397538145232	0.662248703308663	0.662093825893068	0.661932909770105	0.661765958962128	0.661592977642047	0.661413970133198	0.661228940909197	0.661037894593796	0.660840835960732	0.66063776993357	0.660428701585543	0.660213636139386	0.659992578967163	0.659765535590095	0.659532511678375	0.659293513050987	0.65904854567551	0.658797615667927	0.658540729292424	0.65827789296118	0.658009113234163	0.657734396818912	0.657453750570316	0.65716718149039	0.656874696728046	0.656576303578856
0.662598057654679	0.662588941933706	0.66257374931894	0.662552480190654	0.662525135081217	0.66249171467507	0.662452219808708	0.66240665147065	0.66235501080141	0.662297299093458	0.662233517791177	0.662163668490816	0.66208775294044	0.662005773039872	0.661917730840628	0.661823628545856	0.661723468510259	0.661617253240019	0.661504985392717	0.661386667777247	0.66126230335372	0.66113189523337	0.660995446678455	0.660852961102144	0.660704442068411	0.660549893291918	0.660389318637889	0.66022272212199	0.660050107910192	0.65987148031864	0.659686843813507	0.65949620301085	0.65929956267646	0.659096927725704	0.658888303223365	0.658673694383477	0.658453106569153	0.658226545292408	0.65799401621398	0.657755525143147	0.657511078037531	0.657260681002905	0.657004340292995	0.65674206230927	0.656473853600737	0.656199720863721	0.65591967094165	0.655633710824824	0.65534184765019	0.655044088701108
0.661046990898354	0.661037894593796	0.661022734339299	0.661001510514505	0.660974223650892	0.660940874431763	0.660901463692217	0.660855992419128	0.660804461751108	0.660746872978473	0.660683227543197	0.66061352703887	0.660537773210642	0.660455967955168	0.660368113320544	0.660274211506242	0.660174264863039	0.660068275892935	0.65995624724908	0.659838181735677	0.659714082307898	0.659583952071785	0.659447794284148	0.659305612352457	0.659157409834735	0.659003190439436	0.658842958025327	0.658676716601363	0.658504470326552	0.65832622350982	0.658141980609871	0.657951746235042	0.657755525143147	0.657553322241328	0.657345142585887	0.657130991382126	0.656910873984173	0.656684795894808	0.65645276276528	0.656214780395125	0.655970854731971	0.655720991871349	0.655465198056486	0.655203479678103	0.654935843274206	0.654662295529869	0.654382843277015	0.654097493494191	0.653806253306336	0.653509129984552
0.659493177370678	0.659484100525965	0.65946897270412	0.659447794284148	0.659420565796637	0.659387287923745	0.659347961499174	0.659302587508143	0.659251167087356	0.659193701524968	0.659130192260538	0.659060640884983	0.65898504914053	0.658903418920655	0.65881575227002	0.658722051384411	0.658622318610661	0.658516556446579	0.65840476754086	0.658286954693007	0.658163120853233	0.658033269122367	0.657897402751755	0.657755525143147	0.657607639848592	0.657453750570316	0.657293861160607	0.657127975621682	0.656956098105563	0.656778232913932	0.656594384497999	0.656404557458349	0.656208756544796	0.656006986656224	0.655799252840426	0.655585560293941	0.655365914361881	0.655140320537757	0.654908784463295	0.654671311928255	0.65442790887024	0.654178581374496	0.653923335673718	0.653662178147842	0.653395115323833	0.653122153875474	0.652843300623144	0.652558562533593	0.652267946719714	0.651971460440306
0.65793665041311	0.657927593071303	0.657912497753875	0.657891364839193	0.657864194856952	0.657830988488162	0.65779174656512	0.657746470071386	0.657695160141751	0.657637818062199	0.657574445269865	0.657505043352986	0.657429614050854	0.657348159253754	0.657260681002905	0.65716718149039	0.65706766305909	0.656962128202599	0.65685057956515	0.656733019941524	0.65660945227696	0.656479879667058	0.656344305357675	0.656202732744824	0.656055165374558	0.655901606942856	0.6557420612955	0.655576532427949	0.655405024485211	0.655227541761702	0.655044088701108	0.654854669896238	0.654659290088876	0.654457954169619	0.654250667177723	0.654037434300931	0.653818260875309	0.653593152385064	0.653362114462369	0.653125152887174	0.652882273587018	0.65263348263683	0.652378786258735	0.652118190821843	0.651851702842044	0.651579328981789	0.651301076049872	0.651016951001207	0.650726960936596	0.650431113102494
0.656377443389777	0.656368405593565	0.656353342851701	0.656332255541912	0.656305144192998	0.656272009484814	0.656232852248249	0.656187673465199	0.656136474268533	0.656079255942058	0.656016019920475	0.655946767789334	0.65587150128498	0.655790222294496	0.655702932855645	0.655609635156797	0.655510331536862	0.655405024485211	0.655293716641595	0.655176410796057	0.655053109888845	0.654923817010309	0.654788535400804	0.654647268450581	0.654500019699679	0.654346792837803	0.654187591704211	0.65402242028758	0.653851282725878	0.65367418330623	0.653491126464772	0.653302116786512	0.653107159005171	0.652906258003035	0.652699418810789	0.652486646607354	0.652267946719714	0.652043324622744	0.651812785939027	0.651576336438671	0.651333982039113	0.651085728804934	0.650831582947649	0.650571550825507	0.650305638943281	0.650033853952052	0.649756202648992	0.649472691977134	0.649183329025148	0.648888121027104
0.654815589686321	0.654806571478021	0.654791541382249	0.65477049977609	0.654743447187442	0.654710384295006	0.654671311928255	0.654626231067416	0.654575142843429	0.654518048537917	0.65445494958314	0.654385847561948	0.65431074420773	0.65422964140436	0.654142541186127	0.654049445737678	0.653950357393938	0.653845278640039	0.653734212111236	0.653617160592818	0.653494127020023	0.653365114477934	0.653230126201382	0.65308916557484	0.652942236132308	0.652789341557201	0.652630485682226	0.652465672489253	0.652294906109191	0.652118190821843	0.651935531055774	0.651746931388158	0.651552396544632	0.651351931399137	0.651145540973759	0.650933230438565	0.65071500511143	0.65049087045786	0.650260832090818	0.650024895770532	0.64978306740431	0.64953535304634	0.649281758897495	0.649022291305126	0.64875695676285	0.64848576191034	0.648208713533102	0.647925818562252	0.647637084074284	0.647342517290842
0.65325112270874	0.653242124130297	0.653227126750524	0.653206130945859	0.6531791372433	0.653146146320385	0.653107159005171	0.653062176276206	0.653011199262498	0.652954229243475	0.652891267648948	0.65282231605906	0.652747376204234	0.652666449965118	0.652579539372523	0.652486646607354	0.652387774000541	0.652282924032962	0.652172099335357	0.652055302688248	0.651932537021844	0.651803805415944	0.651669111099837	0.651528457452194	0.651381848000961	0.651229286423235	0.651070776545152	0.650906322341755	0.650735927936863	0.650559597602938	0.650377335760944	0.650189146980196	0.649995035978217	0.649795007620577	0.649589066920733	0.649377219039867	0.649159469286711	0.648935823117375	0.648706286135165	0.648470864090398	0.648229562880214	0.647982388548378	0.647729347285081	0.647470445426738	0.647205689455776	0.646935086000416	0.646658641834462	0.646376363877069	0.646088259192518	0.645794334989979
0.651684075882228	0.651675096975213	0.651660132380722	0.651639182474546	0.651612247782777	0.651579328981789	0.651540426898214	0.651495542508919	0.65144467694097	0.651387831471596	0.651325007528149	0.651256206688055	0.651181430678761	0.65110068137768	0.65101396081213	0.650921271159264	0.650822614746002	0.650717994048951	0.650607411694325	0.65049087045786	0.65036837326472	0.650239923189399	0.650105523455627	0.649965177436256	0.64981888865315	0.649666660777074	0.649508497627568	0.649344403172821	0.649174381529543	0.648998436962827	0.648816573886008	0.64862879686052	0.648435110595742	0.648235519948844	0.648030029924625	0.647818645675351	0.647601372500582	0.647378215846996	0.647149181308213	0.646914274624603	0.646673501683104	0.646426868517022	0.646174381305832	0.645916046374975	0.645651870195645	0.64538185938458	0.645106020703837	0.644824361060572	0.644536887506809	0.644243607239205
0.650114482650018	0.650105523455627	0.650090591715077	0.650069687803511	0.650042812246109	0.650009965718078	0.649971149044622	0.649926363200919	0.649875609312087	0.64981888865315	0.649756202648992	0.649687552874311	0.649612941053568	0.649532369060933	0.649445838920215	0.649353352804805	0.649254913037598	0.649150522090917	0.649040182586434	0.64892389729508	0.648801669136959	0.648673501181245	0.648539396646086	0.648399358898493	0.648253391454235	0.648101497977716	0.64794368228186	0.647779948327981	0.647610300225653	0.647434742232576	0.647253278754433	0.647065914344745	0.646872653704722	0.646673501683104	0.646468463276005	0.646257543626744	0.646040748025677	0.64581808191002	0.645589550863671	0.645355160617023	0.645114917046776	0.64486882617574	0.644616894172639	0.644359127351903	0.644095532173457	0.643826115242514	0.643550883309348	0.643269843269073	0.642983002161414	0.642690367170475
0.648542376472217	0.648533437031272	0.648518538212697	0.648497680390982	0.648470864090398	0.648438089984978	0.648399358898493	0.648354671804427	0.648304029825945	0.648247434235854	0.648184886456563	0.648116388060035	0.648041940767736	0.647961546450576	0.647875207128851	0.647782924972171	0.647684702299394	0.647580541578545	0.647470445426738	0.647354416610087	0.647232458043613	0.647104572791153	0.646970764065256	0.646831035227074	0.646685389786255	0.646533831400826	0.646376363877069	0.646212991169401	0.646043717380237	0.645868546759857	0.645687483706266	0.645500532765047	0.645307698629213	0.645108986139047	0.644904400281946	0.644693946192254	0.64447762915109	0.644255454586178	0.64402742807166	0.64379355532792	0.643553842221384	0.643308294764334	0.643056919114704	0.642799721575875	0.642536708596469	0.642267886770132	0.641993262835317	0.641712843675055	0.641426636316735	0.64113464793186
0.646967790824647	0.646958871177592	0.646944005348397	0.646923193710899	0.646896436788455	0.646863735253919	0.646825089929626	0.64678050178736	0.646729971948324	0.646673501683104	0.646611092411626	0.646542745703107	0.646468463276005	0.646388246997966	0.646302098885753	0.64621002110519	0.64611201597108	0.646008085947137	0.645898233645901	0.64578246182865	0.645660773405311	0.645533171434363	0.645399659122736	0.645260239825704	0.645114917046776	0.644963694437576	0.644806575797727	0.644643565074721	0.644474666363792	0.644299883907776	0.644119222096974	0.643932685469005	0.643740278708655	0.643542006647724	0.643337874264861	0.643127886685406	0.642912049181212	0.642690367170475	0.642462846217555	0.642229492032786	0.641990310472292	0.641745307537788	0.641494489376382	0.641237862280373	0.640975432687039	0.640707207178422	0.640433192481113	0.640153395466024	0.639867823148161	0.63957648268639
0.645390759197679	0.64538185938458	0.645367026611542	0.645346261251747	0.645319563827631	0.64528693501087	0.645248375622354	0.645203886632163	0.645153469159534	0.645097124472821	0.645034853989459	0.64496665927591	0.644892542047619	0.644812504168948	0.644726547653123	0.644634674662164	0.644536887506809	0.644433188646445	0.644323580689023	0.64420806639097	0.6440866486571	0.643959330540517	0.643826115242514	0.643687006112467	0.643542006647724	0.643391120493487	0.643234351442695	0.643071703435896	0.642903180561116	0.642728787053723	0.642548527296288	0.642362405818439	0.642170427296711	0.641972596554388	0.641768918561346	0.641559398433889	0.641344041434573	0.641122852972038	0.640895838600824	0.640663004021186	0.640424355078908	0.640179897765106	0.639929638216028	0.639673582712851	0.639411737681471	0.639144109692291	0.638870705459999	0.638591531843347	0.638306595844919	0.638015904610902
0.643811315095067	0.643802435155613	0.643787635504879	0.643766916515388	0.643740278708655	0.643707722755171	0.64366924947438	0.64362485983465	0.643574554953243	0.643518336096278	0.643456204678689	0.643388162264174	0.643314210565151	0.643234351442695	0.643148586906478	0.643056919114704	0.642959350374034	0.642855883139512	0.642746520014486	0.642631263750514	0.642510117247282	0.642383083552501	0.642250165861807	0.64211136751866	0.641966692014225	0.641816142987263	0.641659724224007	0.641497439658034	0.641329293370142	0.641155289588205	0.640975432687039	0.640789727188255	0.640598177760106	0.640400789217338	0.640197566521022	0.639988514778395	0.639773639242688	0.63955294531295	0.639326438533871	0.639094124595595	0.638856009333532	0.638612098728162	0.638362398904837	0.638106916133577	0.63784565682886	0.637578627549409	0.637305834997971	0.637027286021099	0.636742987608914	0.636452946894883
0.642229492032786	0.642220632006288	0.642205865543372	0.642185193015902	0.642158614944469	0.642126131998376	0.642087744995613	0.642043454902832	0.641993262835317	0.641937170056939	0.641875177980125	0.641807288165801	0.641733502323349	0.641653822310542	0.64156825013349	0.641476787946565	0.641379438052341	0.641276202901504	0.641167085092781	0.64105208737285	0.640931212636248	0.640804463925275	0.640671844429896	0.64053335748763	0.640389006583443	0.640238795349631	0.640082727565699	0.639920807158233	0.639753038200776	0.639579424913685	0.639399971663996	0.639214682965274	0.639023563477469	0.638826618006754	0.638623851505368	0.638415269071455	0.638200875948886	0.637980677527092	0.637754679340878	0.637522887070243	0.637285306540191	0.63704194372053	0.636792804725683	0.636537895814475	0.636277223389928	0.636010793999047	0.635738614332603	0.635460691224905	0.635177031653574	0.634887642739313
0.640645323537865	0.640636483463251	0.640621750253034	0.640601124278416	0.64057460605906	0.640542196263076	0.640503895706999	0.640459705355758	0.640409626322648	0.640353659869291	0.640291807405596	0.640224070489708	0.640150450827961	0.64007095027482	0.639985570832815	0.639894314652482	0.639797184032286	0.639694181418545	0.639585309405351	0.639470570734483	0.639349968295314	0.639223505124716	0.639091184406961	0.638953009473612	0.638808983803413	0.638659111022174	0.638503394902651	0.638341839364416	0.638174448473734	0.63800122644342	0.637822177632703	0.63763730654708	0.637446617838164	0.637250116303534	0.637047806886567	0.636839694676281	0.63662578490716	0.636406082958982	0.63618059435664	0.635949324769953	0.635712280013482	0.635469466046335	0.635220888971964	0.634966555037966	0.634706470635871	0.634440642300927	0.634169076711888	0.633891780690784	0.633608761202692	0.633320025355511
0.639058843147213	0.639050023063032	0.639035323169762	0.639014743837937	0.638988285586292	0.638955949081742	0.638917735139356	0.63887364472234	0.638823678941993	0.638767839057678	0.63870612647678	0.638638542754652	0.638565089594574	0.638485768847687	0.638400582512935	0.638309532737	0.638212621814228	0.638109852186554	0.63800122644342	0.637886747321689	0.637766417705555	0.637640240626444	0.637508219262917	0.637370356940559	0.637226657131875	0.637077123456168	0.63692175967942	0.636760569714169	0.636593557619378	0.636420727600294	0.636242084008316	0.636057631340845	0.635867374241133	0.635671317498134	0.635469466046335	0.6352618249656	0.635048399480995	0.634829194962615	0.634604216925406	0.634373471028976	0.634136963077413	0.633894699019083	0.633646684946439	0.633392927095809	0.633133431847196	0.632868205724054	0.632597255393081	0.632320587663986	0.632038209489267	0.631750127963975
0.63747008440646	0.637461284350879	0.637446617838164	0.637426085238185	0.63739968706874	0.637367423995546	0.637329296832206	0.637285306540191	0.637235454228801	0.637179741155133	0.637118168724038	0.637050738488071	0.636977452147443	0.636898311549965	0.636813318690982	0.636722475713308	0.63662578490716	0.636523248710073	0.636414869706825	0.636300650629349	0.63618059435664	0.636054703914662	0.635922982476245	0.635785433360982	0.635642060035113	0.635492866111414	0.635337855349075	0.635177031653574	0.635010399076548	0.634837961815656	0.634659724214438	0.634475690762173	0.634285866093728	0.634090254989401	0.633888862374763	0.633681693320494	0.633468753042211	0.633250046900296	0.633025580399715	0.632795359189835	0.632559389064233	0.632317675960505	0.632070225960064	0.631817045287937	0.63155814031256	0.631293517545559	0.631023183641534	0.630747145397839	0.630465409754346	0.630177983793222
0.63587908086878	0.635870300879585	0.635855667810398	0.635835182030422	0.63580884405652	0.635776654553202	0.635738614332603	0.635694724354453	0.635644985726047	0.635589399702208	0.635527967685245	0.635460691224905	0.635387572018324	0.635308611909968	0.635223812891572	0.635133177102074	0.635036706827543	0.634934404501104	0.634826272702854	0.634712314159779	0.634592531745661	0.634466928480984	0.63433550753283	0.634198272214776	0.634055225986782	0.633906372455075	0.633751715372029	0.633591258636043	0.633425006291403	0.633252962528152	0.633075131681952	0.632891518233932	0.632702126810546	0.63250696218341	0.63230602926915	0.632099333129233	0.631886878969797	0.631668672141479	0.631444718139236	0.631215022602157	0.63097959131328	0.630738430199392	0.630491545330835	0.630238942921298	0.629980629327613	0.629716611049538	0.629446894729543	0.62917148715258	0.628890395245863	0.62860362607863
0.634285866093728	0.634277106208318	0.634262506644993	0.634242067772284	0.634215790106116	0.634183674309791	0.634145721193966	0.634101931716629	0.634052306983061	0.633996848245805	0.63393555690462	0.633868434506436	0.633795482745304	0.633716703462334	0.633632098645641	0.633541670430271	0.633445421098137	0.633343353077935	0.633235468945069	0.633121771421563	0.633002263375969	0.632876947823271	0.632745827924787	0.632608906988059	0.632466188466745	0.632317675960505	0.632163373214876	0.63200328412115	0.631837412716244	0.631665763182562	0.631488339847858	0.631305147185088	0.631116189812265	0.630921472492299	0.630721000132839	0.630514777786111	0.630302810648745	0.630085104061602	0.629861663509597	0.629632494621512	0.629397603169809	0.629156995070435	0.628910676382623	0.62865865330869	0.628400932193828	0.628137519525891	0.627868421935177	0.627593646194203	0.627313199217479	0.627027088061277
0.632690473646062	0.632681733901454	0.632667167905685	0.632646776026611	0.632620558779215	0.632588516825589	0.632550650974908	0.63250696218341	0.632457451554359	0.632402120338007	0.632340969931557	0.632274001879114	0.632201217871631	0.632122619746855	0.632038209489267	0.631947989230012	0.631851961246829	0.631750127963975	0.631642491952146	0.631529055928386	0.631409822756001	0.63128479544446	0.631153977149296	0.631017371171999	0.630874980959905	0.630726810106085	0.630572862349217	0.630413141573467	0.630247651808357	0.630076397228628	0.629899382154102	0.629716611049538	0.629528088524479	0.629333819333101	0.629133808374051	0.628928060690282	0.628716581468888	0.628499376040923	0.628276449881229	0.628047808608248	0.627813457983833	0.627573403913056	0.62732765244401	0.627076209767601	0.626819082217347	0.62655627626916	0.626287798541126	0.626013655793291	0.625733854927421	0.625448402986782
0.63109293709458	0.631084217527406	0.631069685160244	0.631049340360274	0.631023183641534	0.630991215664901	0.630953437238066	0.630909849315509	0.63086045299847	0.630805249534906	0.630744240319455	0.630677426893385	0.630604810944545	0.630526394307308	0.630442178962508	0.630352167037377	0.630256360805468	0.630154762686585	0.630047375246699	0.629934201197861	0.629815243398115	0.629690504851395	0.629559988707433	0.629423698261647	0.629281636955034	0.629133808374051	0.628980216250499	0.628820864461394	0.62865575702884	0.628484898119891	0.628308292046415	0.628125943264944	0.627937856376528	0.62774403612658	0.627544487404717	0.627339215244593	0.627128224823732	0.626911521463354	0.626689110628196	0.626460997926325	0.626227189108956	0.625987690070251	0.625742506847126	0.625491645619046	0.625235112707814	0.624972914577362	0.624705057833534	0.624431549223858	0.624152395637322	0.623867604104143
0.629493290010941	0.629484590657447	0.6294700919793	0.629449794343004	0.629423698261647	0.629391804394888	0.629354113548927	0.629310626676486	0.629261344876769	0.629206269395434	0.629145401624544	0.629078743102524	0.629006295514108	0.628928060690282	0.628844040608226	0.628754237391243	0.62865865330869	0.628557290775902	0.628450152354113	0.628337240750363	0.628218558817416	0.628094109553659	0.627963896103001	0.627827921754771	0.627686189943604	0.627538704249327	0.62738546839684	0.627226486255988	0.627061761841435	0.626891299312523	0.626715102973138	0.626533177271564	0.626345526800332	0.626152156296063	0.625953070639316	0.625748274854417	0.625537774109293	0.625321573715297	0.625099679127028	0.624872095942153	0.62463882990121	0.62439988688742	0.624155272926488	0.623904994186399	0.623649056977209	0.623387467750835	0.623120233100834	0.622847359762185	0.622568854611055	0.622284724664573
0.627891565968498	0.627882886864544	0.627868421935177	0.627848171546221	0.627822136209815	0.627790316584392	0.627752713474661	0.627709327831574	0.627660160752301	0.627605213480188	0.627544487404717	0.627477984061461	0.627405705132028	0.62732765244401	0.627243827970917	0.627154233832115	0.62705887229275	0.626957745763676	0.626850856801371	0.626738208107854	0.62661980253059	0.626495643062401	0.626365732841358	0.626230075150679	0.62608867341862	0.625941531218357	0.625788652267866	0.625630040429801	0.62546569971136	0.625295634264153	0.62511984838406	0.624938346511089	0.624751133229224	0.624558213266272	0.624359591493703	0.624155272926488	0.623945262722926	0.623729566184473	0.623508188755563	0.623281136023424	0.623048413717889	0.622810027711204	0.622565984017829	0.622316288794233	0.62206094833869	0.621799969091064	0.621533357632591	0.621261120685659	0.620983265113576	0.620699797920344
0.626287798541126	0.626279139722184	0.626264708600715	0.626244505541863	0.626218531056812	0.626186785802769	0.626149270582943	0.626105986346516	0.626056934188612	0.626002115350262	0.625941531218357	0.625875183325609	0.625803073350492	0.625725203117193	0.625641574595542	0.625552189900953	0.625457051294351	0.625356161182092	0.625249522115887	0.625137136792716	0.625019008054732	0.624895138889171	0.624765532428249	0.624630191949057	0.624489120873449	0.624342322767932	0.624189801343537	0.624031560455703	0.623867604104143	0.623697936432706	0.623522561729246	0.623341484425467	0.623154709096783	0.622962240462157	0.622764083383945	0.622560242867732	0.622350724062161	0.622135532258762	0.62191467289177	0.621688151537946	0.621455973916384	0.621218145888321	0.620974673456937	0.620725562767154	0.620470820105425	0.620210451899525	0.619944464718332	0.619672865271605	0.619395660409756	0.619112857123618
0.624682021302046	0.624673382803199	0.6246589855481	0.62463882990121	0.624612916372755	0.624581245618712	0.624543818440787	0.624500635786383	0.624451698748575	0.62439700856607	0.624336566623163	0.624270374449693	0.624198433720994	0.624120746257833	0.624037314026352	0.623948139138002	0.623853223849469	0.623752570562603	0.623646181824332	0.62353406032658	0.623416208906171	0.623292630544742	0.623163328368634	0.623028305648791	0.62288756580065	0.622741112384023	0.622588949102979	0.62243107980572	0.622267508484447	0.622098239275231	0.621923276457869	0.621742624455742	0.621556287835665	0.62136427130773	0.621166579725152	0.620963218084101	0.620754191523537	0.620539505325031	0.620319164912592	0.62009317585248	0.619861543853017	0.619624274764399	0.619381374578493	0.619132849428636	0.618878705589428	0.618618949476519	0.618353587646389	0.618082626796132	0.617806073763223	0.61752393552529
0.623074267822652	0.623065649678596	0.623051286347692	0.623031178193714	0.62300532572593	0.622973729599081	0.622936390613366	0.622893309714406	0.622844487993219	0.62278992668618	0.62272962717498	0.62266359098658	0.62259181979316	0.622514315412059	0.62243107980572	0.622342115081616	0.622247423492188	0.622147007434759	0.622040869451463	0.621929012229152	0.621811438599307	0.621688151537946	0.621559154165519	0.621424449746806	0.621284041690803	0.621137933550611	0.620986129023315	0.620828631949856	0.620665446314906	0.620496576246728	0.620322026017044	0.620141800040882	0.619955902876432	0.619764339224892	0.619567113930308	0.619364231979406	0.619155698501433	0.618941518767973	0.618721698192775	0.618496242331568	0.618265156881874	0.618028447682811	0.617786120714899	0.617538182099858	0.617284638100397	0.617025495120004	0.616760759702728	0.616490438532959	0.616214538435196	0.615933066373822
0.621464571671344	0.621455973916384	0.621441644566849	0.621421583985825	0.621395792681617	0.62136427130773	0.621327020662847	0.621284041690803	0.621235335480553	0.621180903266135	0.621120746426627	0.621054866486101	0.620983265113576	0.620905944122954	0.620822905472963	0.620734151267093	0.620639683753519	0.620539505325031	0.620433618518951	0.620322026017044	0.620204730645433	0.620081735374499	0.619953043318785	0.619818657736885	0.619678582031339	0.619532819748516	0.619381374578493	0.619224250354933	0.619061451054952	0.618892980798986	0.618718843850653	0.618539044616607	0.618353587646389	0.618162477632272	0.617965719409105	0.617763317954147	0.617555278386899	0.61734160596893	0.6171223061037	0.616897384336375	0.61666684635364	0.616430697983508	0.616188945195117	0.615941594098535	0.615688650944545	0.615430122124438	0.615166014169793	0.614896333752259	0.614621087683322	0.614340282914081
0.619852966412347	0.619844389080399	0.619830093768757	0.619810080839819	0.619784350800922	0.619752904304331	0.619715742147211	0.619672865271605	0.619624274764399	0.619569971857285	0.619509957926721	0.619444234493884	0.619372803224619	0.619295665929381	0.619212824563177	0.619124281225495	0.619030038160238	0.618930097755644	0.618824462544211	0.618713135202603	0.618596118551566	0.618473415555831	0.618345029324013	0.618210963108505	0.61807122030537	0.617925804454224	0.617774719238118	0.617617968483412	0.617455556159647	0.617287486379407	0.617113763398183	0.616934391614229	0.61674937556841	0.616558719944051	0.616362429566777	0.616160509404348	0.615952964566494	0.615739800304738	0.61552102201222	0.615296635223512	0.615066645614434	0.614831059001856	0.614589881343504	0.614343118737757	0.614090777423439	0.613832863779607	0.613569384325335	0.613300345719493	0.613025754760516	0.612745618386178
0.618239485604543	0.618230928729132	0.618216667511256	0.618196702312621	0.618171033639598	0.618139662143205	0.618102588619086	0.618059814007486	0.618011339393213	0.617957166005611	0.617897295218508	0.617831728550177	0.617760467663281	0.617683514364818	0.617600870606059	0.617512538482483	0.617418520233705	0.617318818243402	0.617213435039229	0.617102373292736	0.616985635819277	0.616863225577915	0.61673514567132	0.616601399345665	0.616461989990517	0.616316921138722	0.61616619646628	0.616009819792231	0.615847795078514	0.615680126429839	0.61550681809355	0.615327874459472	0.615143300059772	0.614953099568798	0.614757277802925	0.614555839720387	0.614348790421112	0.61413613514655	0.61391787927949	0.61369402834388	0.61346458800464	0.613229564067468	0.612988962478642	0.612742789324821	0.612491050832833	0.612233753369466	0.611970903441253	0.611702507694246	0.611428572913792	0.611149106024304
0.616624162800297	0.616615626414555	0.616601399345665	0.616581481954639	0.616555874746877	0.616524578372148	0.61648759362457	0.616444921442583	0.616396562908917	0.616342519250554	0.616282791838689	0.616217382188679	0.616146291959998	0.616069522956175	0.615987077124737	0.615898956557141	0.615805163488701	0.615705700298517	0.615600569509392	0.615489773787743	0.615373315943519	0.615251198930095	0.615123425844182	0.614989999925715	0.614850924557744	0.614706203266323	0.614555839720387	0.614399837731627	0.614238201254364	0.61407093438541	0.613898041363934	0.613719526571313	0.613535394530987	0.613345649908302	0.613150297510356	0.612949342285829	0.612742789324821	0.612530643858676	0.612312911259803	0.612089597041496	0.611860706857743	0.611626246503039	0.611386221912179	0.611140639160069	0.610889504461505	0.610632824170973	0.610370604782426	0.610102852929064	0.609829575383107	0.609550779055566
0.615007031544282	0.614998515680949	0.614984322815612	0.614964453308585	0.614938907664294	0.614907686531256	0.614870790702059	0.614828221113334	0.614779978845723	0.614726065123843	0.614666481316245	0.614601228935365	0.614530309637477	0.614453725222632	0.6143714776346	0.614283568960804	0.614190001432247	0.614090777423438	0.613985899452313	0.613875370180143	0.613759192411453	0.613637369093918	0.613509903318268	0.613376798318183	0.613238057470179	0.613093684293499	0.612943682449989	0.612788055743974	0.612626808122131	0.612459943673354	0.612287466628611	0.612109381360808	0.611925692384632	0.611736404356403	0.611541522073911	0.61134105047626	0.611134994643689	0.610923359797409	0.61070615129942	0.610483374652329	0.610255035499164	0.610021139623179	0.60978169294766	0.609536701535719	0.609286171590093	0.609030109452925	0.608768521605555	0.608501414668291	0.608228795400192	0.607950670698827
0.613388125372308	0.613379630063733	0.613365471455858	0.613345649908302	0.613320165924514	0.613289020151755	0.613252213381076	0.613209746547296	0.613161620728962	0.61310783714832	0.613048397171269	0.612983302307316	0.612912554209525	0.612836154674458	0.61275410564212	0.612666409195887	0.612573067562439	0.61247408311168	0.612369458356664	0.612259195953503	0.612143298701281	0.612021769541956	0.611894611560264	0.611761827983608	0.611623422181953	0.61147939766771	0.611329758095615	0.611174507262608	0.611013649107701	0.610847187711842	0.610675127297781	0.610497472229923	0.610314227014182	0.610125396297821	0.609930984869302	0.609730997658117	0.609525439734622	0.609314316309865	0.609097632735407	0.608875394503137	0.60864760724509	0.608414276733251	0.60817540887936	0.607931009734707	0.607681085489928	0.607425642474794	0.607164687157992	0.606898226146907	0.606626266187393	0.606348814163544
0.611767477810149	0.611759003088284	0.611744878791128	0.611725105277597	0.611699683050163	0.611668612754825	0.611631895181097	0.611589531261975	0.611541522073911	0.61148786883677	0.611428572913792	0.611363635811546	0.611293059179876	0.611216844811848	0.611134994643689	0.611047510754716	0.610954395367274	0.61085565084665	0.610751279701001	0.610641284581266	0.610525668281073	0.610404433736646	0.610277584026708	0.610145122372369	0.610007052137024	0.609863376826232	0.609714100087601	0.609559225710662	0.609398757626739	0.609232699908817	0.6090610567714	0.60888383257037	0.60870103180284	0.608512659106994	0.608318719261936	0.608119217187523	0.607914157944197	0.607703546732815	0.607487388894466	0.607265689910296	0.607038455401314	0.606805691128204	0.606567402991125	0.606323597029513	0.606074279421872	0.605819456485562	0.605559134676584	0.605293320589361	0.605022020956507	0.604745242648603
0.610145122372369	0.610136668268775	0.610122578334934	0.610102852929064	0.61007749255265	0.610046497850431	0.610009869610377	0.609967608763659	0.609919716384623	0.609866193690748	0.609807042042609	0.609742262943826	0.609671858041019	0.609595829123744	0.609514178124438	0.609426907118352	0.609334018323479	0.609235514100478	0.609131396952598	0.609021669525585	0.608906334607597	0.608785395129111	0.608658854162816	0.608526714923514	0.608388980768009	0.608245655194991	0.608096741844919	0.607942244499892	0.607782167083528	0.607616513660822	0.607445288438012	0.607268495762434	0.607086140122372	0.606898226146907	0.606704758605758	0.60650574240912	0.606301182607493	0.606091084391513	0.605875453091773	0.605654294178639	0.605427613262066	0.605195416091404	0.604957708555203	0.604714496681007	0.604465786635154	0.604211584722561	0.603951897386506	0.603686731208413	0.603416092907622	0.603139989341158
0.608521092561153	0.608512659106994	0.608498603588409	0.608478926362911	0.608453627931002	0.608422708936152	0.608386170164783	0.608344012546238	0.60829623715275	0.608242845199408	0.60818383804411	0.608119217187523	0.608048984273028	0.607973141086666	0.607891689557073	0.607804631755421	0.60771196989534	0.607613706332849	0.607509843566269	0.607400384236146	0.60728533112515	0.607164687157992	0.607038455401314	0.606906639063591	0.606769241495016	0.606626266187393	0.606477716774008	0.606323597029513	0.606163910869794	0.605998662351836	0.605827855673586	0.605651495173808	0.605469585331938	0.605282130767924	0.605089136242077	0.6048906066549	0.604686547046926	0.60447696259854	0.604261858629807	0.604041240600287	0.60381511410885	0.603583484893479	0.603346358831081	0.603103741937279	0.602855640366208	0.602602060410308	0.6023430085001	0.602078491203972	0.601808515227952	0.601533087415475
0.606895421865134	0.606887009091178	0.606872988039129	0.606853359065794	0.606828122670685	0.606797279496004	0.606760830326619	0.606718776090039	0.60667111785638	0.60661785683833	0.606558994391109	0.606494532012417	0.606424471342392	0.606348814163544	0.606267562400703	0.606180718120947	0.606088283533534	0.605990260989826	0.605886652983207	0.605777462149003	0.605662691264386	0.605542343248282	0.605416421161269	0.605284928205478	0.605147867724474	0.605005243203152	0.60485705826761	0.604703316685028	0.604544022363541	0.6043791793521	0.604208791840339	0.604032864158428	0.603851400776926	0.603664406306627	0.603471885498404	0.603273843243045	0.603070284571083	0.602861214652629	0.60264663879719	0.60242656245349	0.602200991209279	0.601969930791147	0.601733387064323	0.601491366032476	0.601243873837508	0.600990916759343	0.600732501215712	0.600468633761932	0.60019932109068	0.599924570031765
0.605268143758218	0.605259751694839	0.605245765159947	0.605226184509639	0.605201010242439	0.605170242999275	0.605133883563457	0.605091932860653	0.605044391958859	0.604991262068354	0.604932544541671	0.604868240873539	0.604798352700839	0.604722881802546	0.604641830099668	0.60455519965518	0.604462992673955	0.604365211502686	0.604261858629807	0.604152936685409	0.604038448441149	0.603918396810153	0.60379278484692	0.603661615747216	0.603524892847964	0.603382619627127	0.603234799703597	0.603081436837062	0.602922534927883	0.602758098016956	0.602588130285578	0.602412636055301	0.602231619787785	0.602045086084642	0.601853039687283	0.601655485476752	0.601452428473559	0.601243873837508	0.601029826867521	0.600810293001454	0.600585277815912	0.600354787026055	0.600118826485406	0.599877402185645	0.599630520256407	0.599378186965068	0.599120408716532	0.59885719205301	0.598588543653793	0.598314470335025
0.603639291698421	0.603630920375596	0.603616968407818	0.603597436150479	0.603572324101107	0.603541632899351	0.603505363326963	0.603463516307765	0.603416092907622	0.603363094334404	0.603304521937946	0.603240377209997	0.603170661784174	0.603095377435906	0.60301452608237	0.602928109782426	0.602836130736548	0.60273859128675	0.602635493916501	0.602526841250643	0.602412636055301	0.602292881237789	0.602167579846508	0.602036735070842	0.601900350241051	0.601758428828153	0.601610974443808	0.601457990840194	0.601299481909876	0.601135451685675	0.600965904340528	0.600790844187344	0.600610275678859	0.60042420340748	0.600232632105129	0.600035566643079	0.59983301203179	0.599624973420732	0.599411456098212	0.599192465491189	0.59896800716509	0.598738086823619	0.598502710308557	0.598261883599564	0.598015612813975	0.597763904206584	0.597506764169433	0.597244199231591	0.596976216058927	0.596702821453883
0.602008899126694	0.602000548574	0.601986631222636	0.601967147427278	0.601942097684459	0.601911482632549	0.601875303051732	0.601833559863982	0.601786254133028	0.601733387064323	0.601674960004995	0.601610974443808	0.601541432011106	0.601466334478759	0.601385683760104	0.601299481909876	0.60120773112414	0.601110433740213	0.601007592236588	0.600899209232844	0.600785287489561	0.600665829908221	0.600540839531111	0.600410319541218	0.600274273262119	0.600132704157869	0.599985615832878	0.59983301203179	0.599674896639357	0.599511273680298	0.59934214731917	0.599167521860216	0.598987401747224	0.598801791563369	0.59861069603106	0.598414120011774	0.598212068505891	0.598004546652519	0.597791559729323	0.597573113152335	0.597349212475775	0.597119863391857	0.596885071730591	0.596644843459586	0.596399184683839	0.596148101645532	0.595891600723809	0.595629688434562	0.595362371430203	0.595089656499434
0.600376999465754	0.600368669712373	0.600354787026055	0.600335351760763	0.600310364412031	0.600279825616944	0.600243736154117	0.600202096943668	0.600154909047188	0.600102173667701	0.600043892149626	0.59998006597873	0.599910696782077	0.59983578632797	0.599755336525893	0.599669349426445	0.59957782722127	0.599480772242977	0.599378186965068	0.599270074001846	0.599156436108329	0.599037276180154	0.598912597253476	0.598782402504867	0.598646695251205	0.59850547894956	0.598358757197074	0.59820653373084	0.598048812427769	0.597885597304464	0.597716892517074	0.597542702361154	0.59736303127152	0.597177883822092	0.596987264725738	0.596791178834113	0.596589631137491	0.59638262676459	0.596170170982403	0.595952269196008	0.595728926948388	0.595500149920234	0.595265943929755	0.595026314932474	0.594781269021023	0.594530812424933	0.594274951510419	0.594013692780159	0.593747042873072	0.593475008564086
0.598743626118917	0.598735317193632	0.598721469220331	0.59870208255226	0.598677157683952	0.598646695251205	0.59861069603106	0.598569160941775	0.598522091042793	0.598469487534709	0.598411351759221	0.598347685199094	0.598278489478099	0.598203766360965	0.598123517753314	0.598037745701597	0.597946452393023	0.597849640155484	0.597747311457475	0.597639468908009	0.597526115256528	0.597407253392806	0.597282886346852	0.597153017288807	0.597017649528829	0.596876786516986	0.596730431843133	0.596578589236788	0.596421262567008	0.596258455842249	0.596090173210235	0.595916418957811	0.595737197510793	0.595552513433823	0.595362371430203	0.595166776341739	0.594965733148572	0.594759246969005	0.594547323059328	0.594329966813636	0.594107183763644	0.593878979578494	0.593645360064559	0.593406331165246	0.593161898960787	0.59291206966803	0.592656849640225	0.592396245366804	0.592130263473156	0.591858910720397
0.59710881246893	0.597100524400126	0.597086711187145	0.597067373182521	0.597042510879779	0.597012124913427	0.596976216058927	0.596934785232673	0.596887833491956	0.596835362034932	0.596777372200574	0.596713865468634	0.596644843459586	0.596570307934571	0.59649026079534	0.596404704084184	0.596313639983867	0.59621707081755	0.596114999048709	0.596007427281052	0.59589435825843	0.59577579486474	0.595651740123828	0.595522197199385	0.595387169394833	0.59524666015322	0.595100673057092	0.594949211828376	0.594792280328248	0.594629882557003	0.594462022653913	0.594288704897088	0.594109933703326	0.593925713627962	0.593736049364708	0.593540945745497	0.593340407740308	0.593134440457001	0.592923049141137	0.592706239175798	0.592484016081401	0.592256385515507	0.592023353272625	0.591784925284013	0.591541107617469	0.591291906477127	0.591037328203238	0.590777379271952	0.590512066295091	0.590241396019927
0.595472591876805	0.595464324692465	0.595450546286446	0.595431257010559	0.595406457357326	0.595376147959959	0.595340329592337	0.595299003168985	0.595252169745037	0.595199830516202	0.595141986818722	0.595078640129327	0.595009792065185	0.594935444383842	0.594855598983165	0.594770257901276	0.594679423316483	0.5945830975472	0.594481283051872	0.59437398242889	0.594261198416498	0.594142933892701	0.594019191875165	0.593889975521113	0.593755288127217	0.593615133129481	0.593469514103128	0.593318434762471	0.593161898960787	0.592999910690184	0.592832474081464	0.592659593403978	0.592481273065481	0.592297517611978	0.592108331727567	0.591913720234278	0.591713688091905	0.591508240397836	0.591297382386876	0.591081119431064	0.590859457039492	0.590632400858108	0.590399956669525	0.590162130392821	0.58991892808333	0.589670355932437	0.589416420267359	0.58915712755093	0.588892484381374	0.588622497492077
0.593834997680652	0.59382675140836	0.593813007855275	0.593793767372486	0.593769030451505	0.593738797724246	0.593703069963003	0.593661848080424	0.593615133129481	0.593562926303432	0.593505228935778	0.593442042500223	0.593373368610615	0.593299209020898	0.593219565625046	0.593134440457001	0.5930438356906	0.592947753639501	0.592846196757106	0.592739167636471	0.592626669010221	0.592508703750451	0.592385274868634	0.592256385515507	0.592122038980973	0.591982238693978	0.591836988222397	0.591686291272912	0.591530151690879	0.591368573460201	0.591201560703185	0.591029117680402	0.590851248790539	0.590667958570247	0.590479251693984	0.590285132973854	0.590085607359438	0.589880679937626	0.589670355932437	0.58945464070484	0.589233539752571	0.589007058709937	0.588775203347624	0.588537979572497	0.588295393427395	0.588047451090919	0.587794158877223	0.587535523235787	0.587271550751202	0.587002248142934
0.592196063194513	0.592187837861454	0.592174129206608	0.592154937580342	0.592130263473156	0.592100107515661	0.592064470478561	0.592023353272625	0.591976756948657	0.591924682697454	0.591867131849774	0.591804105876281	0.591735606387501	0.591661635133764	0.591582194005139	0.591497285031378	0.591406910381837	0.591311072365406	0.591209773430427	0.591103016164611	0.590990803294947	0.590873137687609	0.590750022347854	0.590621460419923	0.590487455186928	0.590348010070739	0.590203128631868	0.590052814569341	0.589897071720578	0.589735904061251	0.589569315705151	0.589397310904048	0.589219894047536	0.58903706966289	0.588848842414902	0.588655217105724	0.588456198674699	0.588251792198188	0.588042002889401	0.587826836098207	0.587606297310956	0.587380392150285	0.587149126374922	0.58691250587949	0.586670536694297	0.586423224985131	0.586170577053046	0.585912599334137	0.585649298399326	0.585380680954124
0.590555821707203	0.59054761734016	0.59053394362819	0.590514800920937	0.590490189707884	0.590460110618339	0.590424564421411	0.590383552025984	0.590337074480687	0.590285132973854	0.590227728833488	0.59016486352721	0.590096538662212	0.5900227559852	0.589943517382332	0.589858824879156	0.589768680640537	0.589673086970582	0.589572046312564	0.589465561248833	0.589353634500728	0.589236268928485	0.589113467531133	0.588985233446396	0.58885156995058	0.588712480458461	0.588567968523166	0.588418037836052	0.588262692226575	0.588101935662158	0.587935772248058	0.587764206227214	0.587587241980111	0.58740488402462	0.587217137015843	0.587024005745954	0.586825495144031	0.586621610275884	0.586412356343881	0.586197738686766	0.585977762779474	0.58575243423294	0.585521758793905	0.585285742344717	0.585044390903125	0.58479771062207	0.584545707789471	0.584288388828007	0.584025760294893	0.583757828881651
0.588914306481143	0.588906123106498	0.588892484381374	0.588873390654686	0.588848842414903	0.588818840290022	0.588783385047554	0.588742477594495	0.588696118977292	0.588644310381811	0.588587053133291	0.588524348696304	0.588456198674699	0.588382604811548	0.588303568989088	0.588219093228654	0.588129179690605	0.588033830674258	0.5879330486178	0.587826836098207	0.587715195831155	0.587598130670925	0.587475643610304	0.587347737780481	0.587214416450939	0.587075683029342	0.586931541061415	0.586781994230822	0.586627046359039	0.58646670140522	0.58630096346606	0.586129836775652	0.585953325705343	0.585771434763579	0.585584168595747	0.585391531984019	0.585193529847181	0.584990167240464	0.58478144935537	0.584567381519485	0.584347969196303	0.584123217985029	0.583893133620385	0.583657721972414	0.583416989046272	0.583170940982022	0.582919584054417	0.582662924672683	0.582400969380297	0.582133724854756
0.587271550751202	0.587263388394935	0.587249784699955	0.587230740014449	0.587206254825864	0.587176329760888	0.58714096558543	0.587100163204588	0.587053923662627	0.587002248142934	0.586945137967982	0.586882594599282	0.586814619637333	0.586741214821565	0.586662382030284	0.586578123280597	0.586488440728353	0.58639333666806	0.58629281353281	0.586186873894191	0.5860755204622	0.58595875608515	0.585836583749568	0.585709006580094	0.58557602783937	0.585437650927929	0.585293879384075	0.585144716883762	0.584990167240464	0.584830234405045	0.584664922465618	0.584494235647407	0.584318178312598	0.584136754960187	0.583949970225823	0.583757828881651	0.58356033583614	0.583357496133914	0.58314931495558	0.582935797617543	0.582716949571824	0.582492776405868	0.582263283842349	0.582028477738976	0.581788364088279	0.581542949017411	0.581292238787926	0.581036239795564	0.580774958570029	0.580508401774759
0.585627587723536	0.585619446411224	0.585605877789016	0.585586882204369	0.585562460143707	0.585532612232403	0.585497339234758	0.585456642053974	0.585410521732122	0.585358979450108	0.58530201652763	0.58523963442313	0.58517183473375	0.585098619195269	0.585019989682049	0.584935948206964	0.584846496921336	0.584751638114856	0.584651374215505	0.584545707789471	0.584434641541059	0.584318178312598	0.584196321084339	0.584069072974356	0.583936437238434	0.583798417269958	0.583655016599791	0.583506238896157	0.58335208796451	0.583192567747401	0.583027682324343	0.582857435911665	0.582681832862372	0.582500877665985	0.582314574948393	0.582122929471686	0.58192594613399	0.581723629969299	0.581515986147297	0.581303019973178	0.581084736887464	0.580861142465809	0.580632242418812	0.580398042591813	0.580158548964689	0.579913767651649	0.579663704901015	0.57940836709501	0.579147760749529	0.578881892513917
0.583982450574428	0.583974330331247	0.583960796823769	0.583941850398718	0.583917491541494	0.583887720876151	0.583852539165381	0.58381194731048	0.583765946351325	0.583714537466331	0.583657721972414	0.583595501324943	0.58352787711769	0.583454851082777	0.583376425090612	0.583292601149825	0.583203381407199	0.583108768147595	0.583008763793874	0.582903370906808	0.582792592184996	0.582676430464768	0.582554888720085	0.582427970062437	0.582295677740736	0.582158015141199	0.582014985787233	0.581866593339312	0.581712841594848	0.581553734488061	0.58138927608984	0.5812194706076	0.58104432238514	0.580863835902485	0.580678015775737	0.580486866756908	0.580290393733756	0.580088601729616	0.579881495903225	0.579669081548538	0.579451364094548	0.579228349105092	0.579000042278661	0.578766449448198	0.578527576580896	0.578283429777986	0.578034015274529	0.577779339439194	0.577519408774038	0.577254229914274
0.582336172449135	0.582328073299857	0.582314574948393	0.582295677740736	0.582271382161256	0.582241688832688	0.582206598516106	0.5821661121109	0.582120230654744	0.582068955323559	0.582012287431471	0.581950228430767	0.581882779911844	0.581809943603154	0.581731721371143	0.581648115220186	0.581559127292517	0.581464759868157	0.581365015364829	0.58125989633788	0.581149405480187	0.581033545622067	0.580912319731175	0.580785730912401	0.580653782407767	0.580516477596306	0.580373819993947	0.580225813253398	0.58007246116401	0.579913767651649	0.579749736778559	0.579580372743221	0.579405679880204	0.579225662660015	0.579040325688944	0.5788496737089	0.578653711597249	0.578452444366641	0.578245877164838	0.578034015274529	0.57781686411315	0.577594429232693	0.577366716319511	0.577133731194121	0.576895479810997	0.576651968258366	0.576403202757992	0.57614918966496	0.575889935467452	0.575625446786519
0.580688786460728	0.580680708429722	0.580667245274887	0.580648397341479	0.580624165112839	0.580594549210377	0.58055955039355	0.580519169559834	0.580473407744695	0.580422266121552	0.580365746001737	0.580303848834447	0.580236576206694	0.580163929843254	0.580085911606599	0.580002523496839	0.579913767651649	0.579819646346195	0.579720161993053	0.57961531714213	0.579505114480568	0.579389556832655	0.579268647159725	0.579142388560055	0.579010784268755	0.578873837657658	0.578731552235202	0.578583931646303	0.578430979672234	0.578272700230487	0.578109097374642	0.577940175294221	0.577765938314542	0.577586390896571	0.577401537636761	0.577211383266895	0.577015932653922	0.576815190799781	0.576609162841231	0.576397854049669	0.576181269830948	0.575959415725182	0.575732297406559	0.575499920683138	0.575262291496649	0.575019415922278	0.574771300168464	0.574517950576673	0.574259373621179	0.573995575908837
0.579040325688944	0.579032268800173	0.579018840881906	0.579000042278661	0.578975873472746	0.578946335084244	0.578911427870987	0.578871152728536	0.578825510690143	0.578774502926721	0.578718130746797	0.578656395596472	0.578589299059367	0.578516842856569	0.578439028846571	0.578355859025205	0.578267335525576	0.578173460617983	0.578074236709845	0.577969666345613	0.577859752206681	0.577744497111294	0.57762390401445	0.577497976007793	0.577366716319511	0.577230128314218	0.577088215492836	0.576940981492478	0.576788430086317	0.576630565183452	0.576467390828775	0.576298911202829	0.57612513062166	0.575946053536668	0.575761684534447	0.575572028336631	0.575377089799724	0.575176873914928	0.574971385807975	0.574760630738943	0.57454461410207	0.57432334142557	0.574096818371434	0.573865050735234	0.573628044445923	0.573385805565618	0.573138340289399	0.57288565494508	0.572627755992997	0.572364650025773
0.577390823179026	0.577382787456052	0.577369394813619	0.577350645595508	0.57732654028299	0.577297079494817	0.577262263987197	0.577222094653765	0.577176572525558	0.577125698770973	0.577069474695731	0.577007901742825	0.576940981492478	0.576868715662081	0.576791106106134	0.576708154816185	0.576619863920756	0.57652623568527	0.576427272511973	0.576322976939848	0.576213351644527	0.5760983994382	0.57597812326951	0.575852526223457	0.575721611521285	0.575585382520373	0.575443842714113	0.575296995731793	0.575144845338466	0.574987395434819	0.574824650057038	0.574656613376662	0.574483289700444	0.574304683470195	0.574120799262628	0.5739316417892	0.573737215895948	0.573537526563313	0.573332578905972	0.573122378172655	0.572906929745963	0.572686239142175	0.57246031201106	0.572229154135675	0.571992771432161	0.57175116994954	0.571504355869498	0.571252335506169	0.570995115305913	0.570732701847091
0.57574031194058	0.575732297406559	0.575718940078553	0.575700240299602	0.57567619854994	0.575646815446984	0.575612091745311	0.575572028336631	0.575526626249758	0.575475886650567	0.575419810841965	0.575358400263833	0.575291656492984	0.575219581243106	0.575142176364698	0.575059443845012	0.574971385807975	0.574878004514125	0.57477930236052	0.574675281880665	0.574565945744417	0.574451296757891	0.574331337863365	0.574206072139176	0.574075502799612	0.573939633194795	0.573798466810572	0.573652007268387	0.573500258325154	0.573343223873126	0.573180907939762	0.573013314687581	0.572840448414016	0.572662313551268	0.572478914666146	0.572290256459907	0.572096343768093	0.571897181560362	0.571692774940308	0.571483129145289	0.571268249546237	0.571048141647473	0.570822811086512	0.570592263633866	0.570356505192839	0.570115541799322	0.569869379621578	0.569618024960027	0.569361484247024	0.569099764046633
0.574088824946424	0.574080831624106	0.574067509648445	0.574048859361735	0.574024881243173	0.573995575908837	0.57396094411167	0.573920986741451	0.573875704824763	0.573825099524961	0.573769172142124	0.573707924113016	0.573641357011034	0.573569472546152	0.573492272564859	0.5734097590501	0.573321934121199	0.573228800033793	0.573130359179746	0.573026614087066	0.572917567419823	0.572803221978045	0.572683580697629	0.572558646650234	0.572428423043171	0.572292913219295	0.572152120656885	0.572006048969524	0.571854701905969	0.57169808335002	0.571536197320387	0.571369047970545	0.571196639588591	0.571018976597091	0.570836063552924	0.570647905147127	0.570454506204723	0.570255871684557	0.570052006679119	0.569842916414365	0.569628606249534	0.56940908167696	0.569184348321875	0.568954411942218	0.568719278428423	0.568478953803223	0.568233444221425	0.567982755969706	0.567726895466381	0.567465869261183
0.572436395131439	0.572428423043171	0.572415136457096	0.572396535714765	0.57237262129433	0.572343393810531	0.572308854014672	0.572269002794597	0.572223841174654	0.572173370315666	0.572117591514885	0.572056506205947	0.571990115958825	0.57191842247977	0.571841427611254	0.571759133331902	0.571671541756427	0.571578655135552	0.571480475855933	0.571377006440073	0.571268249546237	0.571154207968354	0.571034884635925	0.570910282613913	0.570780405102641	0.570645255437675	0.570504837089712	0.570359153664453	0.570208208902479	0.570052006679119	0.569890551004314	0.569723846022474	0.569551896012335	0.569374705386808	0.569192278692822	0.569004620611165	0.56881173595632	0.568613629676294	0.568410306852446	0.568201772699304	0.567988032564388	0.567769091928015	0.567544956403109	0.567315631735003	0.567081123801237	0.566841438611349	0.566596582306667	0.566346561160085	0.566091381575851	0.565831050089334
0.570783055391427	0.570775104559149	0.570761853399227	0.570743302252465	0.57071945159597	0.570690302043138	0.570655854343633	0.570616109383356	0.570571068184419	0.570520731905106	0.570465101839833	0.570404179419103	0.570337966209457	0.570266463913414	0.570189674369418	0.570107599551767	0.57002024157055	0.569927602671566	0.56982968523625	0.569726491781588	0.569618024960027	0.569504287559383	0.569385282502743	0.569261012848363	0.569131481789558	0.568996692654592	0.568856648906559	0.568711354143262	0.568560812097088	0.568405026634873	0.568244001757769	0.568077741601102	0.567906250434226	0.567729532660373	0.567547592816498	0.56736043557312	0.567168065734154	0.566970488236747	0.5667677081511	0.566559730680289	0.566346561160085	0.566128205058763	0.56590466797691	0.565675955647225	0.565442073934323	0.565203028834522	0.564958826475631	0.564709473116739	0.56445497514799	0.564195339090358
0.569128838581969	0.569120909027216	0.569107693329337	0.569089191828386	0.569065405000426	0.569036333457505	0.569001977947641	0.56896233935479	0.56891741869882	0.568867217135472	0.56881173595632	0.568750976588727	0.568684940595791	0.568613629676294	0.568537045664642	0.568455190530797	0.568368066380209	0.568275675453746	0.56817802012761	0.568075102913254	0.567966926457296	0.567853493541425	0.567734807082301	0.567610870131454	0.567481685875178	0.567347257634415	0.567207588864642	0.567062683155745	0.566912544231897	0.566757175951423	0.566596582306667	0.566430767423847	0.566259735562915	0.566083491117404	0.565902038614271	0.565715382713742	0.565523528209141	0.56532648002673	0.565124243225526	0.564916822997128	0.564704224665532	0.564486453686942	0.56426351564958	0.564035416273486	0.563802161410316	0.563563757043139	0.563320209286219	0.563071524384805	0.562817708714906	0.562558768783068
0.567473777517283	0.567465869261183	0.567452689060559	0.567434237254717	0.567410514318668	0.567381520863111	0.567347257634415	0.567307725514587	0.567262925521246	0.567212858807583	0.567157526662324	0.567096930509683	0.567031071909311	0.566959952556242	0.566883574280835	0.566801939048704	0.566715048960656	0.566622906252612	0.566525513295527	0.566422872595314	0.566314986792746	0.566201858663369	0.566083491117404	0.565959887199641	0.565831050089334	0.56569698310009	0.565557689679748	0.565413173410261	0.565263438007569	0.565108487321467	0.56494832533547	0.564782956166671	0.564612384065596	0.564436613416056	0.56425564873499	0.564069494672305	0.563878156010714	0.563681637665567	0.563479944684672	0.563273082248126	0.563061055668122	0.562843870388769	0.562621531985894	0.562394046166849	0.562161418770306	0.561923655766051	0.561680763254775	0.561432747467855	0.561179614767134	0.560921371644699
0.565817904969082	0.565810018032358	0.565796873363526	0.56577847130114	0.56575481231916	0.565725897026933	0.565691726169172	0.565652300625933	0.565607621412579	0.565557689679748	0.56550250671331	0.565442073934323	0.565376392898984	0.565305465298571	0.565229292959384	0.565147877842683	0.565061222044618	0.564969327796152	0.564872197462987	0.564769833545476	0.564662238678537	0.564549415631562	0.564431367308314	0.56430809674683	0.564179607119309	0.564045901732003	0.5639069840251	0.563762857572601	0.563613526082194	0.563458993395126	0.563299263486062	0.563134340462948	0.562964228566866	0.562788932171883	0.562608455784896	0.562422804045473	0.562231981725688	0.562035993729957	0.561834845094856	0.561628540988951	0.561417086712609	0.561200487697813	0.560978749507972	0.560751877837719	0.560519878512713	0.56028275748943	0.560040520854956	0.559793174826766	0.559540725752508	0.559283180109774
0.564161253665448	0.564153388068415	0.564140278965233	0.564121926693703	0.56409833172673	0.564069494672305	0.564035416273486	0.563996097408368	0.563951539090058	0.563901742466631	0.563846708821097	0.563786439571352	0.563720936270128	0.563650200604939	0.563574234398021	0.563493039606267	0.563406618321159	0.563314972768694	0.563218105309305	0.563116018437777	0.56300871478316	0.562896197108673	0.562778468311612	0.562655531423242	0.562527389608694	0.562394046166849	0.562255504530226	0.562111768264855	0.561962841070157	0.561808726778809	0.561649429356607	0.561484952902332	0.561315301647599	0.56114047995671	0.560960492326497	0.560775343386167	0.560585037897133	0.56038958075285	0.560188976978638	0.559983231731507	0.559772350299972	0.559556338103866	0.559335200694149	0.559108943752708	0.558877573092161	0.558641094655645	0.558399514516611	0.558152838878602	0.557901074075037	0.557644226568986
0.562503856289686	0.562496012052253	0.562482938547902	0.562464636113678	0.56244110522143	0.56241234647779	0.562378360624155	0.562339148536659	0.562294711226143	0.562245049838118	0.562190165652725	0.562130060084691	0.562064734683276	0.561994191132222	0.56191843124969	0.561837456988199	0.561751270434553	0.561659873809769	0.561563269469003	0.561461459901456	0.561354447730297	0.561242235712563	0.561124826739065	0.561002223834285	0.560874430156265	0.560741448996502	0.560603283779828	0.560459938064287	0.56031141554101	0.560157720034088	0.559998855500431	0.559834826029632	0.559665635843818	0.559491289297505	0.559311790877439	0.559127145202442	0.558937357023243	0.558742431222314	0.558542372813694	0.55833718694281	0.5581268788863	0.557911454051819	0.557690917977852	0.557465276333515	0.557234534918353	0.556998699662138	0.556757776624654	0.556511771995482	0.556260692093783	0.556004543368073
0.560845745479203	0.560837922620872	0.560824884747854	0.560806632196437	0.56078316543741	0.560754485076045	0.560720591852074	0.560681486639665	0.560637170447388	0.560587644418185	0.560532909829321	0.560472968092347	0.560407820753045	0.560337469491376	0.560261916121418	0.560181162591302	0.560095210983148	0.560004063512983	0.55990772253067	0.559806190519818	0.559699470097701	0.559587564015159	0.559470475156506	0.559348206539422	0.55922076131485	0.559088142766885	0.558950354312654	0.558807399502197	0.558659282018342	0.558506005676571	0.558347574424888	0.558183992343679	0.558015263645565	0.557841392675251	0.557662383909379	0.557478241956361	0.557288971556219	0.557094577580418	0.556895065031691	0.556690439043861	0.556480704881658	0.556265867940538	0.556045933746481	0.555820907955803	0.555590796354953	0.555355604860304	0.555115339517946	0.554870006503469	0.554619612121745	0.554364162806702
0.559186953824372	0.559179152364238	0.559166150154376	0.559147947530316	0.559124544961786	0.559095943052693	0.559062142541101	0.559023144299208	0.55897894933331	0.558929558783769	0.558874973924974	0.55881519616529	0.558750227047013	0.558680068246315	0.558604721573182	0.558524188971352	0.558438472518245	0.558347574424888	0.558251497035842	0.558150242829112	0.558043814416061	0.557932214541323	0.557815446082696	0.557693512051048	0.557566415590206	0.557434159976845	0.557296748620373	0.557154185062809	0.557006472978656	0.556853616174773	0.556695618590238	0.55653248429621	0.55636421749578	0.556190822523828	0.556012303846864	0.55582866606287	0.555639913901139	0.555446052222105	0.55524708601717	0.555043020408526	0.554833860648977	0.554619612121745	0.554400280340284	0.554175870948083	0.553946389718462	0.553711842554371	0.553472235488176	0.553227574681447	0.552977866424734	0.552723117137351
0.557527513867408	0.557519733824159	0.557506767308597	0.557488614655494	0.557465276333515	0.557436752945197	0.557403045226935	0.55736415404895	0.557320080415261	0.557270825463646	0.557216390465607	0.55715677682632	0.557091986084587	0.557022019912783	0.556946880116793	0.55686656863595	0.556781087542967	0.556690439043861	0.556594625477877	0.556493649317403	0.556387513167885	0.556276219767729	0.55615977198821	0.556038172833366	0.555911425439892	0.555779533077031	0.555642499146453	0.555500327182137	0.555353020850248	0.555200583949	0.555043020408526	0.554880334290739	0.554712529789183	0.554539611228887	0.554361583066209	0.554178449888681	0.553990216414843	0.553796887494073	0.553598468106421	0.553394963362423	0.553186378502927	0.552972718898901	0.552753990051244	0.55253019759059	0.552301347277106	0.552067445000288	0.551828496778749	0.551584508760009	0.551335487220269	0.551081438564193
0.555867458101248	0.555859699493163	0.555846768702366	0.55582866606287	0.555805392042271	0.555776947241738	0.55574333239599	0.555704548373269	0.555660596175309	0.555611476937301	0.555557191927855	0.555497742548949	0.555433130335885	0.55536335695723	0.555288424214762	0.555208334043401	0.55512308851114	0.555032689818976	0.554937140300828	0.554836442423456	0.554730598786371	0.554619612121745	0.554503485294311	0.554382221301265	0.554255823272155	0.554124294468773	0.553987638285038	0.553845858246874	0.553698958012084	0.553546941370224	0.553389812242463	0.553227574681447	0.553060232871151	0.552887791126734	0.552710253894383	0.552527625751156	0.552339911404815	0.552147115693663	0.551949243586371	0.551746300181796	0.551538290708807	0.551325220526089	0.551107095121962	0.550883920114178	0.550655701249721	0.550422444404607	0.550184155583668	0.549940840920344	0.549692506676456	0.549439159241991
0.554206818968421	0.554199081813372	0.554186186777128	0.554168134192935	0.554144924527324	0.55411655838009	0.554083036484274	0.554044359706134	0.554000529045115	0.553951545633815	0.553897410737945	0.553838125756279	0.553773692220611	0.553704111795696	0.553629386279192	0.553549517601595	0.553464507826174	0.553374359148891	0.553279073898331	0.55317865453561	0.553073103654296	0.55296242398031	0.552846618371833	0.552725689819202	0.552599641444804	0.552468476502966	0.552332198379837	0.552190810593268	0.552044316792689	0.551892720758973	0.551736026404309	0.551574237772056	0.551407359036603	0.551235394503216	0.55105834860789	0.550876225917185	0.550689031128068	0.55049676906774	0.55029944469347	0.550097063092414	0.549889629481432	0.549677149206907	0.549459627744548	0.549237070699201	0.549009483804642	0.548776872923376	0.548539244046428	0.548296603293127	0.548048956910886	0.547796311274982
0.55254562885994	0.552537913175391	0.552525053922804	0.552507051434661	0.552483906176423	0.552455618746507	0.552422189876273	0.552383620429992	0.552339911404815	0.552291063930741	0.552237079270576	0.552177958819884	0.552113704106944	0.552044316792689	0.551969798670649	0.55189015166689	0.551805377839943	0.551715479380728	0.55162045861248	0.551520317990665	0.551415060102893	0.551304687668821	0.551189203540064	0.551068610700086	0.5509429122641	0.55081211147895	0.550676211723	0.550535216506013	0.550389129469024	0.550237954384211	0.55008169515476	0.549920355814726	0.54975394052889	0.549582453592608	0.549405899431659	0.549224282602086	0.549037607790035	0.548845879811586	0.548649103612581	0.548447284268449	0.548240426984022	0.548028537093349	0.547811620059508	0.54758968147441	0.547362727058595	0.547130762661032	0.546893794258907	0.546651827957413	0.546404869989524	0.546152926715779
0.550883920114178	0.550876225917185	0.550863402476682	0.550845450124383	0.550822369324677	0.550794160674603	0.550760824903834	0.55072236287465	0.550678775581905	0.550630064152992	0.550576229847806	0.550517274058697	0.550453198310417	0.550384004260072	0.550309693697057	0.550230268542997	0.550145730851674	0.550056082808956	0.549961326732722	0.54986146507277	0.549756500410741	0.549646435460019	0.549531273065635	0.54941101620417	0.549285667983643	0.549155231643404	0.549019710554015	0.548879108217134	0.548733428265384	0.54858267446223	0.548426850701837	0.548265961008938	0.548100009538684	0.547929000576502	0.547752938537933	0.547571827968484	0.547385673543458	0.547194480067788	0.54699825247587	0.546796995831379	0.546590715327094	0.546379416284709	0.546163104154643	0.545941784515844	0.545715463075592	0.545484145669291	0.545247838260264	0.545006546939533	0.544760277925608	0.54450903756426
0.549221725015759	0.549214052322971	0.549201264722297	0.549183362544685	0.549160346253447	0.549132216444242	0.549098973845054	0.549060619316165	0.549017153850129	0.548968578571728	0.548914894737941	0.548856103737893	0.548792207092808	0.548723206455953	0.548649103612581	0.548569900479866	0.548485599106833	0.548396201674288	0.548301710494739	0.548202128012309	0.548097456802657	0.547987699572878	0.54787285916141	0.547752938537933	0.547627940803262	0.547497869189234	0.547362727058595	0.54722251790488	0.547077245352285	0.546926913155542	0.54677152519978	0.546611085500387	0.546445598202869	0.5462750675827	0.546099498045167	0.545918894125214	0.545733260487282	0.545542601925137	0.545346923361701	0.545146229848875	0.544940526567361	0.544729818826471	0.544514112063939	0.544293411845729	0.544067723865829	0.543837053946054	0.543601408035832	0.543360792211994	0.54311521267855	0.542864675766475
0.54755907579445	0.547551424622107	0.547538672888328	0.547520820923292	0.547497869189234	0.547469818280428	0.547436668923167	0.547398421975732	0.54735507842837	0.547306639403248	0.547253106154422	0.547194480067788	0.547130762661032	0.547061955583576	0.546988060616522	0.546909079672584	0.546825014796021	0.546735868162566	0.546641642079345	0.546542338984796	0.546437961448582	0.546328512171498	0.546213993985376	0.546094409852981	0.545969762867907	0.545840056254465	0.54570529336757	0.545565477692617	0.545420612845358	0.545270702571774	0.545115750747939	0.544955761379881	0.544790738603439	0.544620686684113	0.544445610016917	0.544265513126214	0.544080400665556	0.543890277417521	0.543695148293537	0.543495018333707	0.543289892706629	0.54307977670921	0.542864675766475	0.542644595431376	0.542419541384586	0.542189519434301	0.541954535516029	0.541714595692378	0.541469706152835	0.541219873213546
0.545896004624052	0.545888374987985	0.545875659147486	0.545857857431962	0.545834970302571	0.545806998352199	0.545773942305442	0.545735803018579	0.545692581479542	0.545644278807881	0.545590896254723	0.545532435202726	0.545468897166033	0.545400283790213	0.545326596852208	0.545247838260264	0.545164010053864	0.545075114403657	0.544981153611379	0.544882130109768	0.544778046462483	0.544668905364005	0.544554709639544	0.544435462244939	0.544311166266548	0.544181824921143	0.544047441555789	0.543908019647727	0.543763562804248	0.543614074762565	0.543459559389679	0.543300020682237	0.543135462766394	0.54296588989766	0.542791306460749	0.542611716969424	0.54242712606633	0.542237538522832	0.54204295923884	0.541843393242638	0.541638845690697	0.541429321867493	0.541214827185319	0.540995367184087	0.54077094753113	0.540541574020999	0.540307252575254	0.540067989242252	0.539823790196928	0.539574661740573
0.544232543621294	0.544224935536927	0.544212255615412	0.544194504185387	0.544171681706925	0.544143788771523	0.544110826102078	0.544072794552862	0.544029695109491	0.543981528888888	0.543928297139245	0.54387000123998	0.543806642701683	0.543738223166063	0.543664744405894	0.543586208324944	0.543502616957912	0.543413972470354	0.543320277158602	0.543221533449687	0.543117743901248	0.543008911201441	0.542895038168843	0.54277612775235	0.542652183031075	0.54252320721423	0.542389203641017	0.542250175780508	0.542106127231515	0.541957061722468	0.541802983111274	0.541643895385184	0.541479802660648	0.541310709183165	0.541136619327133	0.540957537595691	0.540773468620557	0.540584417161861	0.540390388107975	0.540191386475336	0.539987417408267	0.53977848617879	0.539564598186438	0.539345758958061	0.539121974147624	0.538893249536008	0.538659591030798	0.538421004666073	0.538177496602186	0.537929073125545
0.542568724844738	0.542561138327086	0.542548494349581	0.542530793240084	0.542508035457588	0.542480221592196	0.542447352365104	0.54240942862857	0.542366451365889	0.542318421691355	0.54226534085022	0.542207210218651	0.542144031303681	0.542075805743153	0.542002535305662	0.541924221890491	0.541840867527545	0.541752474377276	0.541659044730604	0.541560581008839	0.54145708576359	0.541348561676675	0.541235011560025	0.541116438355583	0.540992845135196	0.540864235100506	0.540730611582839	0.540591978043076	0.540448338071538	0.540299695387852	0.540146053840817	0.539987417408267	0.539823790196928	0.53965517644227	0.539481580508355	0.539303006887677	0.539119460201006	0.538930945197215	0.538737466753115	0.538539029873276	0.538335639689848	0.538127301462374	0.537914020577605	0.537695802549301	0.537472653018037	0.537244577750994	0.537011582641757	0.536773673710099	0.536530857101765	0.53628313908825
0.54090458029368	0.54089701535735	0.540884407348196	0.540866756593308	0.54084406355059	0.540816328808751	0.540783553087279	0.54074573723642	0.540702882237142	0.540654989201102	0.540602059370608	0.540544094118572	0.54048109494846	0.540413063494241	0.540340001520325	0.540261910921501	0.54017879372287	0.540090652079771	0.539997488277701	0.539899304732237	0.539796103988949	0.539687888723304	0.539574661740573	0.539456425975731	0.539333184493349	0.539204940487484	0.539071697281565	0.538933458328275	0.538790227209422	0.538642007635814	0.538488803447125	0.538330618611754	0.538167457226685	0.53799932351734	0.537826221837422	0.537648156668765	0.537465132621165	0.53727715443222	0.537084226967157	0.536886355218655	0.536683544306669	0.53647579947824	0.536263126107311	0.53604552969453	0.535823015867053	0.535595590378338	0.535363259107942	0.535126028061305	0.534883903369537	0.534636891289192
0.539240141907053	0.539232598566242	0.539220026549105	0.53920242618195	0.539179797921597	0.539152142355355	0.539119460201006	0.539081752306773	0.539039019651295	0.53899126334359	0.538938484623013	0.538880684859214	0.538817865552089	0.538750028331723	0.538677174958334	0.538599307322209	0.538516427443634	0.538428537472825	0.538335639689848	0.538237736504536	0.538134830456406	0.538026924214562	0.537914020577605	0.537796122473527	0.537673232959609	0.537545355222308	0.537412492577145	0.537274648468584	0.537131826469906	0.536984030283085	0.536831263738651	0.53667353079555	0.536510835541007	0.536343182190373	0.536170575086979	0.535993018701972	0.535810517634158	0.535623076609837	0.53543070048263	0.535233394233304	0.535031162969595	0.534824011926018	0.534611946463685	0.534394972070106	0.534173094358993	0.533946319070057	0.5337146520688	0.533478099346304	0.533236667019012	0.532990361328512
0.53757544156234	0.53756791983084	0.537555383828699	0.537537833881451	0.537515270444825	0.537487694104729	0.537455105577232	0.537417505708535	0.537374895474943	0.537327275982826	0.537274648468584	0.537217014298599	0.537154374969188	0.537086732106546	0.537014087466691	0.536936442935398	0.536853800528132	0.536766162389975	0.53667353079555	0.536575908148937	0.536473296983587	0.536365699962232	0.536253119876788	0.536135559648252	0.5360130223266	0.535885511090676	0.535753029248077	0.535615580235033	0.535473167616283	0.535325795084949	0.535173466462399	0.535016185698111	0.53485395686953	0.534686784181923	0.53451467196822	0.534337624688869	0.534155646931662	0.533968743411581	0.533776918970619	0.533580178577608	0.533378527328043	0.533171970443891	0.532960513273407	0.53274416129094	0.532522920096734	0.532296795416725	0.532065793102335	0.531829919130261	0.531589179602255	0.531343580744909
0.535910511074487	0.535903010965678	0.535890511000836	0.535873011504715	0.535850512931952	0.535823015867053	0.53579052102437	0.535753029248077	0.53571054151214	0.53566305892028	0.535610582705934	0.53555311423221	0.535490654991839	0.535423206607119	0.53535077082986	0.535273349541317	0.535190944752123	0.53510355860222	0.535011193360776	0.534913851426106	0.534811535325587	0.534704247715565	0.534591991381256	0.534474769236653	0.534352584324413	0.534225439815751	0.534093339010325	0.533956285336118	0.53381428234931	0.533667333734155	0.533515443302842	0.533358614995362	0.533196852879364	0.533030161150008	0.532858544129812	0.532682006268497	0.532500552142826	0.532314186456438	0.532122914039679	0.531926739849426	0.531725668968906	0.531519706607518	0.531308858100636	0.531093128909423	0.53087252462063	0.530647050946395	0.530416713724032	0.530181518915827	0.529941472608815	0.529696581014563
0.534245382194817	0.534237903721672	0.534225439815751	0.534207990801024	0.534185557131036	0.534158139388886	0.534125738287209	0.534088354668148	0.534045989503325	0.533998643893805	0.533946319070057	0.533889016391911	0.533826737348504	0.533759483558231	0.533687256768685	0.533610058856593	0.53352789182775	0.533440757816942	0.533348659087877	0.533251598033094	0.533149577173883	0.533042599160191	0.532930666770528	0.532813782911863	0.532691950619523	0.532565173057081	0.532433453516243	0.532296795416725	0.532155202306136	0.532008677859843	0.531857225880842	0.531700850299619	0.531539555174009	0.531373344689045	0.531202223156814	0.531026195016293	0.530845264833193	0.530659437299792	0.530468717234767	0.530273109583015	0.530072619415478	0.529867251928959	0.529657012445932	0.529441906414348	0.529221939407441	0.528997117123524	0.528767445385782	0.52853293014206	0.528293577464651	0.528049393550071
0.532580086609953	0.532572629785037	0.532560201958976	0.532542803454959	0.532520434725433	0.532493096352089	0.532460789045841	0.532423513646797	0.532381271124231	0.532334062576549	0.532281889231246	0.532224752444866	0.532162653702947	0.532095594619974	0.532023576939315	0.53194660253316	0.531864673402456	0.531777791676828	0.53168595961451	0.531589179602255	0.531487454155257	0.531380785917052	0.531269177659428	0.531152632282322	0.531031152813716	0.530904742409527	0.530773404353493	0.530637142057051	0.530495959059221	0.530349859026468	0.530198845752578	0.530042923158515	0.52988209529228	0.529716366328767	0.529545740569606	0.529370222443015	0.529189816503631	0.529004527432352	0.528814360036163	0.528619319247961	0.528419410126381	0.528214637855608	0.528005007745189	0.527790525229844	0.527571195869264	0.527347025347913	0.527118019474818	0.526884184183363	0.526645525531069	0.526402049699375
0.530914655940739	0.53090722077621	0.530894829050269	0.530877481085323	0.530855177332721	0.530827918372744	0.530795704914579	0.530758537796297	0.53071641798482	0.530669346575889	0.530617324794021	0.530560353992466	0.53049843565316	0.530431571386667	0.530359762932124	0.530283012157177	0.530201321057915	0.530114691758793	0.530023126512561	0.529926627700177	0.529825197830724	0.52971883954132	0.529607555597017	0.529491348890707	0.529370222443015	0.529244179402186	0.529113223043977	0.528977356771533	0.528836584115266	0.528690908732727	0.528540334408472	0.528384865053928	0.528224504707245	0.528059257533155	0.52788912782282	0.527714119993673	0.527534238589262	0.527349488279082	0.527159873858405	0.52696540024811	0.5267660724945	0.526561895769119	0.526352875368568	0.526139016714308	0.525920325352466	0.525696806953631	0.525468467312649	0.525235312348415	0.524997348103654	0.5247545807447
0.52924912174117	0.529241708248776	0.529229352642536	0.529212055244071	0.529189816503631	0.529162637000083	0.529130517440887	0.529093458662072	0.529051461628203	0.529004527432352	0.528952657296052	0.528895852569255	0.528834114730286	0.528767445385782	0.528695846270643	0.528619319247961	0.528537866308958	0.528451489572912	0.528360191287077	0.528263973826606	0.528162839694462	0.528056791521331	0.527945832065519	0.52782996421286	0.527709190976607	0.527583515497324	0.527452941042768	0.527317471007779	0.527177108914147	0.527031858410491	0.526881723272124	0.526726707400914	0.526566814825147	0.526402049699375	0.52623241630427	0.526057919046465	0.525878562458396	0.525694351198136	0.525505290049227	0.525311383920503	0.525112637845916	0.52490905698435	0.524700646619432	0.524487412159344	0.524269359136623	0.524046493207961	0.523818820153999	0.523586345879115	0.523349076411212	0.523107017901496
0.527583515497324	0.527576123688404	0.527563804220764	0.527546557415238	0.527524383720975	0.527497283715423	0.527465258104314	0.52742830772163	0.527386433529577	0.527339636618552	0.527287918207098	0.527231279641864	0.527169722397556	0.527103248076882	0.527031858410491	0.526955555256918	0.526874340602508	0.52678821656135	0.526697185375197	0.526601249413383	0.526500411172744	0.526394673277518	0.526284038479257	0.526168509656723	0.526048089815785	0.525922782089309	0.525792589737044	0.525657516145505	0.525517564827849	0.525372739423745	0.525223043699245	0.525068481546647	0.52490905698435	0.524744774156711	0.524575637333893	0.524401650911712	0.524222819411471	0.524039147479802	0.523850639888493	0.523657301534318	0.523459137438853	0.523256152748298	0.523048352733288	0.522835742788702	0.522618328433464	0.522396115310342	0.522169109185749	0.521937315949522	0.521700741614716	0.521459392317382
0.525917868626291	0.525910498511779	0.525898215200959	0.525881019013878	0.525858910398581	0.525831889931098	0.525799958315426	0.525763116383498	0.525721365095158	0.52567470553812	0.525623138927936	0.525566666607945	0.525505290049227	0.525439010850551	0.525367830738314	0.525291751566481	0.525210775316514	0.525124904097304	0.52503414014509	0.524938485823383	0.524837943622875	0.52473251616135	0.524622206183591	0.524507016561277	0.524386950292879	0.524262010503554	0.524132200445027	0.523997523495475	0.523857983159404	0.523713583067521	0.523564326976602	0.523410218769354	0.523251262454275	0.523087462165509	0.522918822162693	0.522745346830803	0.522567040679994	0.522383908345436	0.522195954587145	0.52200318428981	0.521805602462613	0.521603214239049	0.521396024876736	0.521184039757228	0.520967264385812	0.520745704391312	0.520519365525885	0.520288253664804	0.520052374806251	0.519811735071095
0.524252212475122	0.524244864065541	0.524232616929083	0.524215471385001	0.524193427880236	0.524166486989398	0.524134649414747	0.524097915986163	0.52405628766112	0.524009765524651	0.523958350789307	0.523902044795111	0.523840849009514	0.523774765027339	0.523703794570722	0.523627939489049	0.523547201758893	0.523461583483937	0.523371086894899	0.523275714349452	0.523175468332137	0.523070351454272	0.522960366453859	0.522845516195482	0.522725803670203	0.522601231995455	0.522471804414926	0.52233752429844	0.522198395141839	0.52205442056685	0.521905604320958	0.521751950277264	0.521593462434349	0.521430144916123	0.52126200197168	0.521089037975141	0.52091125742549	0.520728664946418	0.520541265286148	0.520349063317263	0.520152064036532	0.51995027256472	0.519743694146411	0.519532334149807	0.519316198066539	0.51909529151146	0.518869620222448	0.518639190060189	0.518404007007965	0.51816407717144
0.522586578319763	0.522579251625232	0.522567040679994	0.522549945802515	0.522527967438626	0.522501106161516	0.522469362671702	0.52243273779701	0.522391232492542	0.522344847840641	0.522293585050853	0.522237445459883	0.522176430531544	0.522110541856705	0.522039781153234	0.521964150265934	0.521883651166477	0.521798285953329	0.52170805685168	0.521612966213353	0.52151301651673	0.52140821036665	0.521298550494324	0.521184039757228	0.521064681139002	0.520940477749342	0.520811432823885	0.52067754972409	0.520538831937119	0.520395283075705	0.520246906878024	0.520093707207556	0.519935688052948	0.51977285352786	0.519605207870826	0.519432755445089	0.51925550073845	0.519073448363096	0.51888660305544	0.518694969675939	0.518498553208926	0.51829735876242	0.518091391567942	0.517880656980325	0.517665160477517	0.517444907660382	0.517219904252491	0.51699015609992	0.516755669171029	0.516516449556247
0.520920997364008	0.520913692394236	0.520901517656401	0.520884473468177	0.520862560274286	0.52083577864649	0.520804129283565	0.520767613011277	0.520726230782351	0.520679983676437	0.520628872900073	0.520572899786635	0.520512065796294	0.520446372515961	0.520375821659228	0.520300415066305	0.520220154703956	0.520135042665424	0.520045081170355	0.51995027256472	0.519850619320726	0.519746124036725	0.519636789437124	0.519522618372279	0.519403613818398	0.519279778877425	0.519151116776934	0.519017630870004	0.518879324635101	0.518736201675952	0.518588265721407	0.518435520625311	0.518277970366355	0.518115619047939	0.517948470898014	0.517776530268931	0.517599801637285	0.517418289603745	0.51723199889289	0.517040934353035	0.516845100956053	0.516644503797196	0.516439148094904	0.516229039190616	0.516014182548577	0.515794583755635	0.515570248521036	0.515341182676218	0.515107392174593	0.514868883091335
0.51925550073845	0.519248217502738	0.519236078987809	0.519219085510541	0.519197237514548	0.519170535570161	0.519138980374412	0.519102572751002	0.519061313650278	0.519015204149192	0.518964245451266	0.518908438886546	0.518847785911553	0.518782288109232	0.518711947188893	0.518636764986146	0.518556743462838	0.51847188470698	0.518382190932668	0.518287664480007	0.51818830781502	0.518084123529562	0.517975114341224	0.517861283093233	0.517742632754349	0.517619166418754	0.517490887305943	0.517357798760603	0.517219904252491	0.51707720737631	0.516929711851571	0.516777421522466	0.516620340357718	0.516458472450444	0.516291822017999	0.516120393401824	0.515944191067288	0.515763219603523	0.515577483723256	0.51538698826264	0.515191738181068	0.514991738561004	0.514786994607783	0.514577511649433	0.514363295136471	0.514144350641706	0.513920683860036	0.513692300608238	0.513459206824754	0.513221408569474
0.517590119499432	0.517582858006676	0.517570755729476	0.517553812983917	0.517532030212499	0.517505407984124	0.517473946994072	0.517437648063981	0.517396512141812	0.517350540301817	0.517299733744496	0.517244093796558	0.517183621910872	0.517118319666408	0.517048188768185	0.516973231047209	0.516893448460402	0.516808843090531	0.516719417146136	0.516625172961444	0.516526112996287	0.516422239836011	0.51631355619138	0.516200064898478	0.516081768918607	0.515958671338175	0.515830775368584	0.515698084346115	0.515560601731803	0.51541833111131	0.515271276194795	0.515119440816781	0.514962828936007	0.514801444635289	0.51463529212137	0.514464375724762	0.514288699899593	0.514108269223436	0.513923088397151	0.513733162244703	0.513538495712991	0.513339093871666	0.513134961912942	0.51292610515141	0.512712529023837	0.512494239088974	0.512271241027345	0.512043540641044	0.511811143853518	0.511574056709351
0.515924884628013	0.5159176448867	0.515905578861377	0.515888686867329	0.515866969345943	0.515840426864688	0.515809060117094	0.515772869922728	0.515731857227162	0.515686023101943	0.515635368744546	0.515579895478339	0.515519604752527	0.515454498142103	0.515384577347791	0.51530984419598	0.515230300638659	0.515145948753347	0.515056790743016	0.514962828936007	0.514864065785949	0.514760503871669	0.514652145897095	0.514538994691155	0.514421053207682	0.514298324525295	0.514170811847293	0.514038518501535	0.513901447940321	0.513759603740258	0.513612989602139	0.5134616093508	0.51330546693498	0.513144566427182	0.512978912023515	0.512808508043547	0.512633358930145	0.512453469249309	0.512268843690006	0.512079487064001	0.511885404305675	0.511686600471846	0.511483080741587	0.51127485041603	0.511061914918172	0.510844279792682	0.510621950705689	0.510394933444579	0.510163233917781	0.509926858154549
0.514259827028927	0.51425260904714	0.51424057928716	0.514223738063478	0.514202085816362	0.514175623111846	0.514144350641706	0.514108269223436	0.514067379800218	0.514021683440886	0.513971181339887	0.51391587481724	0.513855765318484	0.513790854414628	0.51372114380209	0.513646635302638	0.513567330863321	0.5134832325564	0.513394342579269	0.513300663254375	0.513202197029136	0.513098946475848	0.512990914291589	0.512878103298126	0.512760516441806	0.512638156793448	0.512511027548236	0.512379132025594	0.512242473669071	0.512101056046208	0.511954882848413	0.511803957890822	0.51164828511216	0.511487868574595	0.511322712463592	0.511152821087755	0.510978198878671	0.510798850390749	0.510614780301048	0.510425993409108	0.510232494636776	0.510034289028019	0.509831381748744	0.509623778086604	0.509411483450807	0.509194503371915	0.508972843501641	0.50874650961264	0.5085155075983	0.508279843472521
0.512594977529558	0.512587781314971	0.512575787833126	0.512558997397713	0.512537410447884	0.512511027548236	0.512479849388787	0.512443876784955	0.512403110677525	0.512357552132617	0.512307202341645	0.512252062621274	0.51219213441337	0.512127419284951	0.512057918928125	0.51198363516003	0.511904569922768	0.511820725283332	0.511732103433531	0.51163870668991	0.511540537493662	0.511437598410543	0.511329892130775	0.511217421468946	0.511100189363908	0.510978198878671	0.510851453200287	0.510719955639733	0.510583709631794	0.51044271873493	0.510296986631151	0.510146517125876	0.5099913141478	0.509831381748744	0.509666724103507	0.509497345509713	0.509323250387656	0.509144443280131	0.508960928852272	0.508772711891378	0.508579797306739	0.508382190129451	0.508179895512236	0.507972918729248	0.507761265175884	0.507544940368577	0.507323949944601	0.507098299661861	0.506867995398677	0.506633043153573
0.510930366878906	0.510923192438788	0.510911235247191	0.510894495617005	0.510872973986263	0.510846670918122	0.510815587100839	0.510779723347754	0.510739080597253	0.510693659912735	0.510643462482577	0.510588489620084	0.510528742763445	0.51046422347568	0.510394933444579	0.510320874482646	0.510242048527024	0.510158457639434	0.51007010400609	0.509976989937623	0.509879117868995	0.509776490359412	0.509669110092226	0.509556979874837	0.509440102638593	0.509318481438678	0.509192119454001	0.509061019987081	0.508925186463923	0.508784622433894	0.508639331569589	0.508489317666698	0.50833458464387	0.50817513654256	0.508010977526888	0.507842111883482	0.507668544021322	0.507490278471574	0.507307319887427	0.507119673043921	0.50692734283777	0.50673033428718	0.506528652531667	0.506322302831867	0.506111290569341	0.505895621246376	0.505675300485785	0.505450334030696	0.505220727744344	0.504986487609849
0.50926602574657	0.509258873087783	0.509246952197871	0.509230263388923	0.50920880709785	0.509182583886365	0.509151594440967	0.509115839572909	0.509075320218176	0.509030037437445	0.508979992416046	0.508925186463923	0.508865621015581	0.508801297630035	0.508732217990753	0.508658383905593	0.508579797306739	0.508496460250624	0.508408374917862	0.508315543613161	0.508217968765244	0.508115652926754	0.508008598774163	0.507896809107675	0.507780286851117	0.507659035051839	0.507533056880596	0.507402355631434	0.507266934721565	0.507126797691247	0.506981948203649	0.506832390044717	0.506678127123035	0.506519163469681	0.506355503238077	0.506187150703839	0.506014110264615	0.505836386439926	0.505653983870998	0.505466907320593	0.50527516167283	0.505078751933005	0.50487768322741	0.504671960803141	0.504461590027903	0.504246576389817	0.504026925497209	0.503802643078414	0.503573734981553	0.503340207174326
0.507601984721728	0.50759485385073	0.507582969273263	0.507566331300617	0.507544940368577	0.507518797037413	0.507487901991858	0.507452256041081	0.507411860118658	0.50736671528254	0.507316822715009	0.507262183722639	0.507202799736247	0.507138672310837	0.507069803125548	0.506996193983587	0.506917846812166	0.506834763662429	0.506746946709378	0.50665439825179	0.506557120712137	0.506455116636492	0.506348388694437	0.506236939678966	0.506120772506378	0.505999890216174	0.505874295970943	0.505743993056244	0.505608984880487	0.505469274974805	0.505324866992926	0.505175764711037	0.505021972027646	0.504863492963433	0.504700331661111	0.504532492385264	0.504359979522193	0.504182797579757	0.5040009511872	0.503814445094987	0.503623284174624	0.503427473418479	0.5032270179396	0.503021922971521	0.502812193868074	0.502597836103188	0.502378855270687	0.502155257084086	0.501927047376375	0.501694232099805
0.505938274312125	0.505931165234967	0.505919316980032	0.505902729857805	0.505881404302946	0.505855340874281	0.505824540254773	0.505789003251502	0.505748730795635	0.50570372394239	0.505653983870998	0.505599511884659	0.505540309410494	0.505476377999492	0.505407719326455	0.505334335189933	0.505256227512159	0.505173398338978	0.505085849839773	0.504993584307383	0.504896604158017	0.504794911931169	0.50468851028952	0.504577402018845	0.504461590027903	0.504341077348336	0.504215867134552	0.504085962663612	0.503951367335109	0.503812084671041	0.50366811831568	0.503519472035439	0.503366149718732	0.503208155375833	0.503045493138723	0.502878167260941	0.502706182117425	0.502529542204351	0.502348252138969	0.502162316659425	0.501971740624596	0.501776529013902	0.501576686927126	0.501372219584224	0.501163132325131	0.500949430609566	0.500731120016829	0.500508206245593	0.500280695113693	0.500048592557915
0.504274924943065	0.504267837665394	0.504256025742401	0.504239489483766	0.504218229323023	0.504192245817548	0.504161539648535	0.504126111620972	0.504085962663612	0.504041093828937	0.503991506293122	0.503937201355986	0.503878180440952	0.503814445094987	0.503745996988548	0.503672837915523	0.503594969793158	0.503512394661992	0.50342511468578	0.503333132151412	0.503236449468829	0.503135069170934	0.5030289939135	0.502918226475068	0.502802769756847	0.502682626782608	0.502557800698569	0.50242829477328	0.502294112397503	0.502155257084086	0.502011732467833	0.501863542305368	0.501710690475	0.501553180976576	0.501391017931334	0.50122420558175	0.501052748291382	0.50087665054471	0.500695916946965	0.500510552223965	0.500320561221933	0.500125948907326	0.499926720366641	0.499722880806236	0.499514435552132	0.499301390049817	0.499083749864043	0.498861520678623	0.498634708296216	0.498403318638117
0.502611966956406	0.502604901483465	0.50259312590115	0.502576640518335	0.502555445767427	0.502529542204351	0.502498930508529	0.502463611482852	0.502423586053658	0.502378855270687	0.502329420307054	0.502275282459194	0.502216443146824	0.502152903912884	0.502084666423482	0.502011732467833	0.501934103958192	0.501851782929783	0.501764771540726	0.501673072071953	0.501576686927126	0.501475618632551	0.501369869837078	0.501259443312008	0.501144341950988	0.501024568769907	0.50090012690678	0.500771019621634	0.500637250296387	0.500498822434726	0.500355739661971	0.500208005724945	0.500055624491835	0.499898599952047	0.49973693621606	0.499570637515274	0.499399708201849	0.499224152748551	0.499043975748578	0.498859181915398	0.498669776082567	0.498475763203556	0.498277148351561	0.498073936719322	0.497866133618923	0.497653744481603	0.497436774857547	0.497215230415685	0.49698911694348	0.496758440346712
0.500949430609566	0.500942386946191	0.500930647712616	0.500914213216907	0.500893083890341	0.500867260287391	0.500836743085702	0.500801533086069	0.500761631212407	0.500717038511715	0.50066775615404	0.50061378543243	0.50055512776289	0.500491784684327	0.500423757858493	0.500351049069926	0.500273660225881	0.50019159335626	0.500104850613538	0.500013434272683	0.499917346731069	0.499816590508393	0.499711168246576	0.499601082709665	0.499486336783738	0.499366933476786	0.499242875918613	0.499114167360709	0.498980811176139	0.498842810859411	0.49870017002635	0.498552892413965	0.498400981880305	0.498244442404322	0.498083278085722	0.497917493144807	0.49774709192233	0.497572078879322	0.497392458596934	0.497208235776266	0.497019415238188	0.496826001923167	0.496628000891081	0.49642541732103	0.496218256511147	0.496006523878397	0.495790224958379	0.495569365405121	0.495343950990865	0.495113987605859
0.499287346074524	0.499280324225149	0.499268621347702	0.499252237749442	0.499231173860513	0.499205430233933	0.499175007545571	0.499139906594119	0.499100128301069	0.499055673710672	0.499006543989905	0.498952740428423	0.498894264438514	0.498831117555046	0.498763301435411	0.498690817859461	0.498613668729444	0.498531856069933	0.498445382027752	0.498354248871893	0.498258458993437	0.49815801490546	0.498052919242943	0.497943174762674	0.497828784343145	0.497709750984445	0.497586077808149	0.497457768057203	0.497324825095802	0.497187252409266	0.497045053603911	0.496898232406916	0.496746792666181	0.496590738350187	0.496430073547851	0.496264802468369	0.496094929441062	0.495920458915215	0.495741395459913	0.495557743763871	0.495369508635257	0.495176695001517	0.494979307909189	0.494777352523719	0.494570834129263	0.494359758128499	0.494144130042417	0.493923955510122	0.493699240288617	0.493469990252596
0.497625743436833	0.497618743405489	0.497607076890887	0.497590744199476	0.497569745760268	0.497544082124825	0.497513753967233	0.497478762084083	0.497439107394437	0.497394790939797	0.497345813884063	0.497292177513494	0.497233883236657	0.497170932584374	0.497103327209669	0.497031068887703	0.496954159515712	0.496872601112931	0.496786395820524	0.496695545901502	0.49660005374064	0.496499921844386	0.496395152840774	0.496285749479319	0.496171714630918	0.496053051287746	0.495929762563141	0.495801851691488	0.495669322028104	0.495532177049107	0.495390420351292	0.495244055651992	0.495093086788946	0.494937517720151	0.494777352523719	0.49461259539772	0.494443250660034	0.494269322748182	0.494090816219166	0.4939077357493	0.493720086134031	0.493527872287768	0.49333109924369	0.493129772153569	0.492923896287571	0.49271347703406	0.492498519899402	0.492279030507758	0.492055014600872	0.491826478037859
0.495964652694642	0.495957674484955	0.495946044339242	0.495929762563141	0.495908829584529	0.495883245953509	0.495853012342385	0.495818129545641	0.495778598479908	0.495734420183933	0.495685595818538	0.495632126666578	0.495574014132893	0.495511259744258	0.49544386514932	0.495371832118546	0.495295162544147	0.495213858440017	0.495127921941652	0.495037355306072	0.494942160911739	0.494842341258466	0.494737898967325	0.494628836780551	0.494515157561438	0.494396864294233	0.494273960084026	0.494146448156634	0.494014331858478	0.493877614656464	0.493736300137852	0.493590392010119	0.493439894100825	0.493284810357471	0.493125144847347	0.492960901757389	0.492792085394013	0.492618700182963	0.492440750669143	0.492258241516447	0.492071177507586	0.491879563543912	0.491683404645231	0.49148270594962	0.491277472713234	0.491067710310111	0.490853424231968	0.490634620088003	0.49041130360468	0.490183480625519
0.49430410375771	0.494297147372905	0.494285553601453	0.494269322748182	0.494248455239832	0.494222951625046	0.494192812574343	0.494158038880097	0.494118631456504	0.494074591339552	0.494025919686982	0.49397261777824	0.493914687014437	0.493852128918288	0.493784945134066	0.493713137427529	0.493636707685864	0.493555657917613	0.493469990252596	0.493379706941835	0.493284810357471	0.49318530299267	0.493081187461538	0.492972466499017	0.492859142960788	0.492741219823159	0.492618700182963	0.492491587257432	0.492359884384087	0.492223595020605	0.492082722744699	0.491937271253976	0.491787244365806	0.491632646017178	0.491473480264548	0.491309751283698	0.491141463369571	0.490968620936115	0.490791228516119	0.490609290761044	0.490422812440846	0.490231798443804	0.490036253776331	0.489836183562794	0.489631593045318	0.489422487583593	0.489208872654672	0.488990753852769	0.488768136889048	0.488541027591412
0.492644126446438	0.492637191889336	0.492625634496848	0.492609454572989	0.492588652543362	0.492563228955145	0.492533184477072	0.492498519899402	0.492459236133897	0.492415334213781	0.492366815293706	0.492313680649709	0.492255931679163	0.492193569900724	0.492126596954277	0.492055014600872	0.491978824722661	0.491898029322827	0.491812630525509	0.491722630575722	0.491628031839276	0.491528836802685	0.491425048073075	0.491316668378089	0.491203700565782	0.491086147604516	0.490964012582852	0.490837298709432	0.490706009312857	0.49057014784157	0.490429717863721	0.490284723067035	0.490135167258679	0.489981054365113	0.48982238843195	0.489659173623801	0.489491414224119	0.489319114635044	0.489142279377234	0.488960913089698	0.488775020529623	0.488584606572196	0.488389676210422	0.488190234554939	0.487986286833823	0.487777838392399	0.487564894693037	0.487347461314946	0.487125543953973	0.486899148422383
0.4909847504909	0.490977837763922	0.49096631675443	0.490950187765626	0.490929451221975	0.490904107669191	0.490874157774215	0.490839602325194	0.490800442231447	0.490756678523432	0.490708312352713	0.490655344991908	0.490597777834649	0.490535612395526	0.490468850310033	0.490397493334504	0.490321543346051	0.490241002342491	0.490155872442272	0.490066155884397	0.489971855028335	0.489872972353939	0.489769510461349	0.489661472070895	0.489548860023	0.489431677278069	0.48930992691638	0.48918361213797	0.489052736262515	0.488917302729207	0.488777315096623	0.488632777042594	0.488483692364068	0.488330064976967	0.488171898916041	0.488009198334719	0.487841967504951	0.48767021081705	0.487493932779529	0.487313138018931	0.487127831279655	0.486938017423781	0.486743701430888	0.486544888397867	0.48634158353873	0.486133792184416	0.485921519782593	0.485704771897449	0.485483554209491	0.485257872515328
0.489326005529881	0.489319114635044	0.489307630011913	0.489291551962872	0.489270880911247	0.489245617401285	0.489215762098136	0.489181315787827	0.489142279377234	0.489098653894048	0.489050440486734	0.488997640424492	0.488940255097206	0.488878286015397	0.48881173481016	0.488740603233108	0.488664893156305	0.488584606572196	0.488499745593533	0.488410312453295	0.488316309504607	0.488217739220649	0.488114604194565	0.488006907139367	0.487894650887833	0.487777838392399	0.487656472725054	0.487530557077218	0.487400094759629	0.487265089202217	0.487125543953973	0.486981462682821	0.48683284917548	0.486679707337317	0.486522041192209	0.486359854882386	0.486193152668281	0.486021938928367	0.485846218158995	0.485665994974225	0.485481274105654	0.485292060402239	0.485098358830114	0.484900174472408	0.484697512529049	0.484490378316574	0.484278777267929	0.484062714932264	0.483842196974726	0.48361722917625
0.487667921109919	0.487661052048842	0.487649603814766	0.48763357670926	0.487612971154508	0.487587787693289	0.487558026988958	0.487523689825422	0.487484777107109	0.487441289858937	0.487393229226273	0.487340596474892	0.487283392990928	0.487221620280823	0.487155279971271	0.487084373809158	0.487008903661492	0.48692887151534	0.486844279477751	0.486755129775673	0.486661424755876	0.486563166884862	0.486460358748769	0.486353003053282	0.486241102623523	0.486124660403952	0.486003679458255	0.485878162969227	0.485748114238655	0.485613536687196	0.485474433854245	0.485330809397805	0.48518266709435	0.485030010838685	0.484872844643795	0.484711172640701	0.484544999078303	0.484374328323219	0.484199164859623	0.484019513289077	0.48383537833036	0.483646764819289	0.483453677708539	0.483256122067456	0.483054103081871	0.482847626053898	0.482636696401746	0.482421319659506	0.482201501476948	0.48197724761931
0.486010526684356	0.486003679458255	0.485992267615262	0.485976291456129	0.485955751401897	0.485930647993873	0.485900981893616	0.48586675388291	0.485827964863734	0.485784615858229	0.485736708008659	0.485684242577369	0.485627220946739	0.485565644619127	0.485499515216822	0.485428834481973	0.485353604276532	0.485273826582178	0.485189503500247	0.485100637251653	0.485007230176802	0.484909284735508	0.484806803506897	0.484699789189314	0.48458824460022	0.484472172676087	0.484351576472288	0.484226459162981	0.484096824040994	0.483962674517697	0.483824014122877	0.483680846504605	0.483533175429099	0.483381004780585	0.483224338561147	0.483063180890581	0.482897536006239	0.48272740826287	0.482552802132458	0.482373722204052	0.482190173183595	0.482002159893749	0.481809687273713	0.481612760379036	0.48141138438143	0.481205564568575	0.480995306343919	0.480780615226479	0.48056149685063	0.480337956965894
0.484353851612389	0.484347026222082	0.484335650771533	0.484319725560678	0.48429925100941	0.484274227657568	0.48424465616491	0.484210537311093	0.484171871995646	0.484128661237927	0.484080906177095	0.484028608072062	0.483971768301446	0.483910388363522	0.483844469876162	0.483774014576777	0.483699024322251	0.483619501088874	0.483535446972261	0.483446864187283	0.483353755067976	0.483256122067456	0.48315396775783	0.483047294830095	0.482936106094039	0.482820404478136	0.482700193029438	0.482575474913457	0.482446253414046	0.482312531933281	0.482174313991329	0.482031603226315	0.481884403394191	0.48173271836859	0.481576552140681	0.481415908819022	0.481250792629405	0.481081207914695	0.480907159134669	0.480728650865849	0.480545687801328	0.480358274750598	0.480166416639363	0.479970118509361	0.479769385518168	0.47956422293901	0.479354636160562	0.479140630686744	0.478922212136519	0.478699386243677
0.482697925158132	0.482691121604036	0.482679782546628	0.482663908285022	0.482643499237968	0.482618555943829	0.482589079060563	0.482555069365699	0.482516527756308	0.482473455248967	0.482425852979723	0.482373722204052	0.482317064296807	0.48225588075217	0.482190173183595	0.482119943323749	0.482045193024443	0.481965924256568	0.481882139110014	0.4817938397936	0.481701028634985	0.48160370808058	0.481501880695462	0.481395549163272	0.481284716286118	0.481169384984468	0.481049558297038	0.480925239380684	0.480796431510277	0.480663138078587	0.480525362596146	0.480383108691127	0.480236380109199	0.480085180713391	0.479929514483945	0.479769385518168	0.479604798030276	0.479435756351237	0.479262264928607	0.479084328326367	0.478901951224745	0.478715138420044	0.478523894824463	0.478328225465906	0.478128135487803	0.477923630148906	0.477714714823098	0.477501394999188	0.477283676280708	0.477061564385696
0.48104277648968	0.481035994771816	0.481024692107578	0.481008868795265	0.480988525252476	0.480963662016099	0.480934279742291	0.480900379206447	0.480861961303181	0.480819027046284	0.480771577568689	0.480719614122428	0.480663138078587	0.480602150927251	0.48053665427745	0.480466649857101	0.480392139512936	0.48031312521044	0.480229609033773	0.480141593185694	0.480049079987476	0.47995207187882	0.479850571417763	0.479744581280583	0.479634104261696	0.479519143273554	0.479399701346532	0.479275781628817	0.479147387386289	0.479014522002398	0.478877188978034	0.478735391931402	0.478589134597878	0.478438420829876	0.478283254596696	0.478123639984381	0.477959581195559	0.477791082549287	0.477618148480887	0.477440783541782	0.47725899239932	0.477072779836603	0.476882150752304	0.476687110160485	0.476487663190406	0.476283815086333	0.476075571207339	0.475862937027105	0.475645918133712	0.475424520229432
0.479388434678183	0.47938167479617	0.479370408524471	0.479354636160562	0.479334358120895	0.47930957494088	0.479280287274869	0.479246495896124	0.479208201696796	0.479165405687887	0.479118108999212	0.479066312879359	0.479010018695638	0.478949227934035	0.47888394219915	0.478814163214143	0.478739892820663	0.478661132978783	0.478577885766925	0.478490153381782	0.478397938138233	0.478301242469261	0.478200068925856	0.478094420176922	0.477984299009178	0.477869708327048	0.477750651152557	0.477627130625214	0.477499150001895	0.477366712656721	0.47722982208093	0.477088481882745	0.476942695787241	0.4767924676362	0.476637801387972	0.476478701117321	0.476315171015274	0.476147215388962	0.475974838661462	0.475798045371622	0.475616840173898	0.475431227838174	0.475241213249584	0.475046801408329	0.474847997429486	0.474644806542815	0.474437234092567	0.474225285537276	0.474008966449555	0.473788282515891
0.477734928696919	0.47772819064998	0.477716960769523	0.477701239352203	0.477681026813322	0.477656323686811	0.477627130625214	0.477593448399657	0.477555277899827	0.477512620133932	0.477465476228668	0.477413847429171	0.477357735098975	0.477297140719959	0.477232065892291	0.477162512334366	0.477088481882745	0.477009976492083	0.476926998235058	0.476839549302288	0.476747632002254	0.476651248761211	0.476550402123094	0.476445094749428	0.476335329419221	0.476221109028863	0.476102436592019	0.475979315239509	0.475851748219198	0.475719738895865	0.475583290751085	0.47544240738309	0.475297092506638	0.475147349952873	0.474993183669178	0.474834597719026	0.474671596281832	0.474504183652789	0.474332364242709	0.474156142577857	0.47397552329978	0.473790511165129	0.473601111045487	0.473407327927175	0.473209166911072	0.47300663321242	0.472799732160625	0.472588469199061	0.472372849884857	0.472152879888694
0.476082287420378	0.476075571207339	0.476064377716167	0.476048707242695	0.476028560201072	0.47600393712375	0.475974838661462	0.475941265583198	0.475903218776175	0.475860699245808	0.475813708115665	0.475762246627431	0.475706316140858	0.475645918133712	0.475581054201724	0.475511726058522	0.475437935535571	0.475359684582103	0.475276975265042	0.475189809768929	0.475098190395838	0.475002119565287	0.474901599814151	0.474796633796564	0.474687224283817	0.474573374164259	0.474455086443181	0.474332364242709	0.474205210801682	0.474073629475532	0.473937623736156	0.473797197171786	0.473652353486853	0.473503096501848	0.473349430153175	0.473191358493009	0.473028885689134	0.472862016024792	0.472690753898522	0.472515103823988	0.472335070429814	0.472150658459407	0.471961872770777	0.471768718336357	0.471571200242812	0.471369323690846	0.471163093995008	0.470952516583493	0.470737596997929	0.470518340893178
0.474430539623351	0.474423845242642	0.474412688138137	0.474397068604845	0.474376987055764	0.474352444021863	0.474323440152063	0.474289976213213	0.474252053090062	0.474209671785224	0.474162833419139	0.474111539230036	0.47405579057388	0.473995588924323	0.47393093587265	0.473861833127718	0.473788282515891	0.47371028598097	0.473627845584123	0.473540963503805	0.473449642035673	0.473353883592505	0.473253690704106	0.473149066017212	0.473040012295389	0.472926532418933	0.472808629384757	0.472686306306279	0.472559566413305	0.472428413051908	0.472292849684298	0.472152879888694	0.472008507359191	0.471859735905613	0.471706569453378	0.471549012043344	0.471387067831657	0.471220741089595	0.471050036203406	0.470874957674144	0.470695510117494	0.470511698263604	0.470323526956902	0.470131001155912	0.46993412593307	0.469732906474529	0.469527348079966	0.469317456162378	0.469103236247879	0.468884693975492
0.472779713980028	0.472773041429681	0.472761920708564	0.472746352110863	0.472726336048419	0.472701873050718	0.472672963764869	0.472639608955577	0.472601809505119	0.472559566413306	0.472512880797447	0.472461753892309	0.472406187050068	0.472346181740256	0.47228173954971	0.472212862182508	0.472139551459909	0.472061809320277	0.471979637819018	0.471893039128491	0.471802015537935	0.471706569453378	0.471606703397547	0.471502420009771	0.471393722045885	0.471280612378123	0.471163093995008	0.471041170001245	0.470914843617595	0.470784118180762	0.470648997143259	0.470509484073284	0.470365582654579	0.470217296686297	0.470064630082852	0.469907586873777	0.469746171203564	0.469580387331517	0.469410239631582	0.469235732592185	0.469056870816062	0.468873659020087	0.46868610203509	0.468494204805673	0.46829797239003	0.468097409959746	0.467892522799608	0.467683316307404	0.467469795993714	0.467251967481708
0.47112983906309	0.471123188340745	0.47111210399908	0.471096586331456	0.471076635748559	0.471052252778391	0.471023438066243	0.470990192374676	0.470952516583493	0.470910411689697	0.470863878807466	0.4708129191681	0.47075753411998	0.470697725128516	0.47063349377609	0.470564841761999	0.470491770902388	0.470414283130183	0.470332380495016	0.470246065163149	0.470155339417393	0.470060205657019	0.469960666397669	0.469856724271259	0.469748382025883	0.469635642525703	0.469518508750849	0.469396983797296	0.469271070876757	0.469140773316554	0.469006094559494	0.46886703816374	0.468723607802678	0.468575807264771	0.468423640453422	0.468267111386824	0.468106224197809	0.467940983133688	0.467771392556093	0.467597456940812	0.467419180877619	0.467236569070097	0.467049626335465	0.466858357604392	0.46666276792081	0.466462862441724	0.466258646437018	0.466050125289251	0.465837304493457	0.465620189656933
0.469480943342827	0.469474314445726	0.469463266478919	0.469447799734938	0.469427914623315	0.469403611670563	0.469374891520158	0.469341754932512	0.469304202784949	0.469262236071668	0.469215855903705	0.469165063508893	0.469109860231815	0.469050247533752	0.46898622699263	0.468917800302956	0.46884496927576	0.468767735838519	0.468686102035089	0.468600070025629	0.468509642086514	0.46841482061025	0.468315608105388	0.468212007196424	0.468104020623701	0.467991651243304	0.467874902026955	0.467753776061899	0.467628276550784	0.467498406811543	0.467364170277269	0.46722557049608	0.467082611130989	0.466935295959765	0.466783628874786	0.466627613882895	0.466467255105248	0.466302556777155	0.466133523247922	0.465960158980684	0.465782468552238	0.465600456652867	0.465414128086164	0.465223487768848	0.465028540730578	0.464829292113764	0.46462574717337	0.464417911276713	0.464205789903263	0.463989388644432
0.467833055186239	0.467826448111233	0.467815436514032	0.467800020686343	0.467780201036539	0.467755978089644	0.467727352487315	0.467694324987817	0.46765689646599	0.467615067913224	0.467568840437414	0.46751821526292	0.467463193730524	0.467403777297374	0.467339967536934	0.467271766138918	0.467199174909233	0.467122195769905	0.467040830759008	0.466955082030588	0.466864951854579	0.466770442616718	0.466671556818456	0.466568297076859	0.466460666124514	0.46634866680942	0.466232302094886	0.466111575059411	0.465986488896574	0.465857046914911	0.465723252537785	0.465585109303263	0.465442620863976	0.465295790986985	0.465144623553633	0.464989122559404	0.464829292113764	0.464665136440011	0.464496659875111	0.464323866869535	0.464146761987091	0.463965349904746	0.463779635412456	0.463589623412975	0.463395318921676	0.46319672706636	0.462993853087053	0.46278670233582	0.462575280276548	0.46235959248475
0.466186202856167	0.466179617599712	0.466168642366211	0.466153277446543	0.466133523247922	0.466109380293883	0.466080849224263	0.466047930795171	0.466010625878969	0.465968935464231	0.465922860655706	0.465872402674282	0.465817562856933	0.465758342656672	0.465694743642493	0.465626767499317	0.465554416027921	0.465477691144872	0.465396594882459	0.465311129388608	0.465221296926807	0.465127099876016	0.465028540730578	0.464925622100125	0.464818346709477	0.46470671739854	0.4645907371222	0.464470408950206	0.464345736067056	0.464216721771877	0.464083369478298	0.463945682714322	0.463803665122188	0.463657320458239	0.463506652592774	0.463351665509902	0.463192363307391	0.463028750196515	0.462860830501888	0.462688608661305	0.46251208922557	0.462331276858325	0.462146176335872	0.46195679254699	0.461763130492751	0.461565195286329	0.461362992152805	0.46115652642897	0.46094580356312	0.460730829114849
0.464540414510407	0.464533851068568	0.464522912192207	0.464507598171374	0.464487909412125	0.464463846436502	0.464435409882519	0.464402600504133	0.46436541917122	0.464323866869535	0.464277944700684	0.464227653882073	0.464172995746868	0.46411397174394	0.464050583437814	0.463982832508606	0.463910720751962	0.463834250078987	0.463753422516175	0.463668240205329	0.463578705403482	0.463484820482812	0.463386587930548	0.463284010348878	0.463177090454851	0.463065831080271	0.462950235171591	0.462830305789803	0.462706046110314	0.462577459422836	0.462444549131252	0.462307318753491	0.462165771921393	0.462019912380569	0.461869743990264	0.461715270723203	0.461556496665446	0.461393426016227	0.4612260630878	0.46105441230527	0.460878478206427	0.460698265441572	0.460513778773343	0.460325023076529	0.460132003337886	0.459934724655952	0.459733192240846	0.45952741141407	0.459317387608315	0.459103126367241
0.462895718200852	0.462889176569299	0.462878274042865	0.462863010910768	0.462843387577902	0.462819404564819	0.462791062507707	0.462758362158367	0.462721304384186	0.462679890168103	0.462634120608571	0.462583996919515	0.462529520430287	0.462470692585614	0.462407514945546	0.462339989185391	0.462268117095659	0.462191900581986	0.462111341665066	0.462026442480575	0.461937205279084	0.461843632425981	0.461745726401376	0.461643489800006	0.46153692533114	0.461426035818473	0.461310824200019	0.461191293528001	0.46106744696873	0.460939287802492	0.460806819423415	0.460670045339345	0.460528969171711	0.460383594655387	0.46023392563855	0.460079966082531	0.459921720061669	0.459759191763151	0.459592385486856	0.459421305645189	0.459245956762912	0.459066343476975	0.458882470536338	0.458694342801786	0.45850196524575	0.458305342952114	0.458104481116021	0.457899385043675	0.457690060152142	0.457476511969137
0.46125214187262	0.461245622046637	0.461234755862263	0.46121954360789	0.461199985687248	0.461176082619394	0.46114783503869	0.461115243694781	0.461078309452563	0.461037033292153	0.460991416308849	0.460941459713093	0.460887164830419	0.460828533101407	0.460765566081625	0.460698265441572	0.460626632966614	0.460550670556915	0.460470380227364	0.460385764107501	0.460296824441433	0.46020356358775	0.460105984019435	0.460004088323769	0.459897879202233	0.459787359470405	0.459672532057853	0.459553400008023	0.459429966478122	0.459302234738999	0.45917020817502	0.459033890283939	0.458893284676764	0.458748395077621	0.458599225323608	0.458445779364655	0.458288061263367	0.458126075194874	0.457959825446668	0.457789316418441	0.457614552621919	0.457435538680686	0.457252279330011	0.457064779416666	0.45687304389874	0.456677077845451	0.456476886436954	0.456272474964139	0.456063848828435	0.455851013541598
0.459609713363208	0.459603215337684	0.459592385486856	0.459577224098283	0.459557731574533	0.459533908433168	0.459505755306721	0.459473272942677	0.45943646220344	0.459395324066302	0.459349859623406	0.459300070081705	0.459245956762912	0.459187521103455	0.459124764654419	0.459057689081487	0.458986296164878	0.458910587799276	0.458830565993763	0.458746232871737	0.458657590670833	0.458564641742838	0.458467388553603	0.458365833682944	0.458259979824548	0.45814982978587	0.458035386488021	0.457916652965664	0.457793632366893	0.457666327953113	0.457534743098918	0.457398881291961	0.45725874613282	0.457114341334862	0.456965670724099	0.456812738239047	0.456655547930569	0.456494103961723	0.456328410607607	0.456158472255188	0.455984293403142	0.455805878661678	0.455623232752361	0.455436360507936	0.455245266872138	0.455049956899509	0.4548504357552	0.454646708714775	0.45443878116401	0.454226658598689
0.457968460401636	0.457961984171073	0.457951190644626	0.457936080109021	0.457916652965664	0.457892909730618	0.457864851034588	0.457832477622895	0.457795790355451	0.45775479020672	0.457709478265685	0.457659855735808	0.457605923934979	0.45754768429547	0.457485138363877	0.457418287801063	0.457347134382097	0.457271679996179	0.457191926646576	0.457107876450539	0.457019531639227	0.456926894557617	0.456829967664421	0.456728753531984	0.456623254846192	0.456513474406367	0.456399415125162	0.456281080028445	0.456158472255188	0.456031595057346	0.455900451799732	0.455765045959887	0.455625381127953	0.455481461006526	0.455333289410525	0.455180870267038	0.455024207615177	0.454863305605921	0.454698168501959	0.454528800677525	0.454355206618233	0.454177390920902	0.453995358293385	0.453809113554386	0.453618661633276	0.453424007569906	0.453225156514409	0.453022113727012	0.452814884577826	0.452603474546646
0.456328410607607	0.456321956166118	0.456311198954238	0.456296139257864	0.456276777477233	0.456253114126912	0.456225149835774	0.456192885346977	0.456156321517935	0.456115459320284	0.456070299839844	0.456020844276583	0.455967093944563	0.455909050271897	0.45584671480069	0.45578008918698	0.45570917520068	0.455633974725502	0.455554489758893	0.455470722411953	0.455382674909356	0.455290349589267	0.455193748903249	0.455092875416172	0.454987731806115	0.45487832086426	0.45476464549479	0.454646708714775	0.454524513654056	0.45439806355513	0.454267361773019	0.454132411775146	0.453993217141205	0.453849781563015	0.453702108844388	0.45355020290098	0.453394067760139	0.453233707560754	0.453069126553096	0.452900329098653	0.452727319669965	0.452550102850456	0.45236868333425	0.452183065926	0.4519932555407	0.451799257203496	0.451601076049496	0.451398717323571	0.451192186380157	0.450981488683047
0.454689591490671	0.454683158831981	0.45467243792421	0.454657429052422	0.454638132615688	0.454614549127075	0.454586679213625	0.454554523616328	0.4545180831901	0.454477358903745	0.45443235183992	0.454383063195093	0.454329494279498	0.454271646517082	0.454209521445456	0.454143120715831	0.454072446092957	0.453997499455056	0.453918282793747	0.453834798213975	0.453747047933926	0.453655034284943	0.453558759711437	0.453458226770797	0.453353438133283	0.453244396581936	0.45313110501246	0.453013566433119	0.452891783964617	0.452765760839982	0.45263550040444	0.452501006115287	0.452362281541757	0.452219330364886	0.45207215637737	0.451920763483421	0.451765155698616	0.451605337149741	0.45144131207464	0.451273084822045	0.451100659851414	0.450924041732757	0.450743235146465	0.450558244883126	0.450369075843343	0.45017573303755	0.449978221585812	0.449776546717636	0.449570713771768	0.449360728195986
0.453052030449397	0.453045619566843	0.453034934952077	0.453019976889327	0.4530007457765	0.452977242125159	0.452949466560513	0.452917419821386	0.452881102760192	0.4528405163429	0.452795661649	0.45274653987146	0.452693152316679	0.45263550040444	0.452573585667853	0.452507409753296	0.452436974420356	0.452362281541757	0.452283333103288	0.452200131203732	0.45211267805478	0.45202097598095	0.451925027419497	0.451824834920316	0.45172040114585	0.451611728870985	0.451498820982944	0.451381680481175	0.451260310477238	0.451134714194685	0.451004894968936	0.450870856247153	0.450732601588103	0.450590134662029	0.450443459250502	0.450292579246279	0.450137498653157	0.449978221585812	0.449814752269648	0.449647095040632	0.449475254345127	0.449299234739724	0.449119040891063	0.448934677575658	0.448746149679714	0.448553462198934	0.448356620238333	0.44815562901204	0.447950493843099	0.44774122016326
0.451415754770547	0.451409365657081	0.451398717323571	0.451383810053412	0.451364644243341	0.451341220403421	0.451313539157024	0.451281601240805	0.451245407504674	0.451204958911766	0.451160256538399	0.451111301574038	0.451058095321246	0.451000639195635	0.450938934725813	0.450872983553322	0.450802787432579	0.450728348230806	0.450649667927958	0.450566748616652	0.450479592502079	0.450388201901924	0.450292579246279	0.450192727077545	0.450088648050337	0.449980344931381	0.44986782059941	0.449751078045052	0.449630120370713	0.449504950790464	0.449375572629911	0.44924198932607	0.449104204427238	0.448962221592851	0.448816044593349	0.448665677310027	0.44851112373489	0.448352387970494	0.448189474229795	0.448022386835983	0.447851130222318	0.447675708931957	0.447496127617784	0.447312391042226	0.447124504077075	0.446932471703298	0.446736299010843	0.446535991198452	0.446331553573452	0.446122991551557
0.449780791628264	0.449774424276451	0.449763812211807	0.449748955716891	0.44972985518727	0.449706511131506	0.449678924171132	0.449647095040632	0.449611024587413	0.449570713771768	0.449526163666846	0.449477375458603	0.449424350445764	0.449367090039768	0.449305595764714	0.449239869257307	0.449169912266788	0.449095726654875	0.449017314395684	0.448934677575658	0.448847818393486	0.448756739160015	0.448661442298167	0.448561930342842	0.448458205940821	0.448350271850666	0.448238130942613	0.44812178619846	0.448001240711456	0.44787649768618	0.447747560438417	0.447614432395032	0.44747711709384	0.447335618183465	0.447189939423205	0.447040084682885	0.446886057942707	0.446727863293101	0.446565504934564	0.446398987177499	0.446228314442052	0.446053491257939	0.445874522264274	0.445691412209387	0.445504165950647	0.445312788454271	0.445117284795134	0.444917660156574	0.444713919830193	0.444506069215652
0.44814716808326	0.448140822485282	0.448130246676472	0.448115440938553	0.448096405665924	0.44807314136564	0.448045648657397	0.448013928273506	0.447977981058866	0.447937807970931	0.447893410079673	0.447844788567542	0.447791944729417	0.447734879972562	0.447673595816567	0.44760809389329	0.447538375946799	0.447464443833299	0.447386299521064	0.447303945090358	0.447217382733362	0.447126614754081	0.447031643568262	0.446932471703298	0.446829101798129	0.446721536603148	0.446609778980085	0.446493831901905	0.44637369845269	0.44624938182752	0.446120885332354	0.445988212383897	0.445851366509473	0.445710351346887	0.445565170644286	0.445415828260015	0.445262328162469	0.445104674429937	0.44494287125045	0.444776922921615	0.444606833850455	0.444432608553232	0.444254251655281	0.444071767890826	0.443885162102802	0.443694439242665	0.443499604370203	0.443300662653343	0.443097619367948	0.442890479897616
0.446514911082015	0.446508587229669	0.446498047663022	0.446483292662961	0.446464322622713	0.446441138047827	0.446413739556161	0.446382127877849	0.446346303855284	0.446306268443076	0.446262022708018	0.44621356782905	0.446160905097206	0.446104035915569	0.446042961799215	0.445977684375158	0.445908205382281	0.445834526671276	0.445756650204569	0.445674578056244	0.445588312411966	0.445497855568893	0.445403209935592	0.445304378031942	0.445201362489041	0.4450941660491	0.444982791565342	0.444867242001891	0.444747520433654	0.444623630046208	0.444495574135675	0.444363356108593	0.444226979481788	0.444086447882239	0.443941765046934	0.443792934822729	0.443639961166202	0.443482848143494	0.44332159993016	0.443156220811002	0.442986715179908	0.442813087539681	0.442635342501864	0.442453484786566	0.442267519222276	0.442077450745679	0.441883284401468	0.441685025342143	0.441482678827819	0.441276250226021
0.444884047455982	0.444877745340683	0.444867242001891	0.444852537719654	0.444833632886027	0.444810528005055	0.444783223692752	0.444751720677078	0.444716019797914	0.444676122007025	0.444632028368026	0.44458374005634	0.444531258359155	0.444474584675369	0.444413720515545	0.444348667501841	0.44427942736796	0.444206001959073	0.444128393231753	0.4440466032539	0.443960634204659	0.443870488374336	0.443776168164312	0.443677676086949	0.443575014765492	0.44346818693397	0.443357195437091	0.443242043230128	0.443122733378811	0.442999269059204	0.442871653557587	0.442739890270324	0.442603982703735	0.442463934473963	0.442319749306831	0.442171431037698	0.442018983611315	0.441862411081669	0.441701717611828	0.441536907473781	0.441367985048273	0.441194954824634	0.44101782140061	0.440836589482181	0.440651263883384	0.440461849526121	0.440268351439977	0.440070774762018	0.4398691247366	0.439663406715161
0.443254603920798	0.44324832353358	0.443237856407696	0.443223202822359	0.44320436316845	0.443181337948506	0.443154127776698	0.443122733378811	0.443087155592211	0.443047395365816	0.443003453760061	0.442955331946851	0.442903031209522	0.442846552942788	0.44278589865269	0.442721069956535	0.442652068582834	0.442578896371237	0.442501555272461	0.442420047348215	0.442334374771121	0.442244539824627	0.442150544902924	0.44205239251085	0.441950085263794	0.441843625887596	0.44173301721844	0.441618262202748	0.441499363897062	0.441376325467929	0.441249150191777	0.44111784145479	0.440982402752777	0.440842837691035	0.440699149984215	0.440551343456172	0.44039942203982	0.440243389776983	0.440083250818237	0.439919009422745	0.439750669958102	0.439578236900158	0.439401714832849	0.439221108448019	0.43903642254524	0.438847662031623	0.438654831921636	0.438457937336899	0.438256983505998	0.438051975764273
0.441626607075504	0.441620348407018	0.441609917478463	0.441595314568211	0.441576540065973	0.441553594472775	0.441526478400945	0.441495192574088	0.441459737827057	0.441420115105921	0.441376325467929	0.441328370081468	0.441276250226021	0.441219967292113	0.441159522781262	0.441094918305915	0.441026155589394	0.440953236465821	0.440876162880053	0.440794936887606	0.44070956065457	0.440620036457535	0.440526366683495	0.440428553829759	0.440326600503854	0.440220509423425	0.44011028341613	0.439995925419529	0.439877438480972	0.439754825757482	0.439628090515629	0.439497236131411	0.439362266090116	0.439223183986191	0.439079993523105	0.4389326985132	0.43878130287755	0.438625810645806	0.438466225956039	0.438302553054585	0.438134796295874	0.437962960142269	0.437787049163887	0.437607068038427	0.437423021550987	0.437234914593878	0.437042752166436	0.436846539374832	0.436646281431866	0.436441983656773
0.440000083401768	0.439993846442287	0.439983451694846	0.439968899436981	0.439950190057226	0.439927324055098	0.439900302041082	0.4398691247366	0.43983379297399	0.43979430769647	0.439750669958102	0.439702880923753	0.439650941869049	0.439594854180323	0.439534619354566	0.439470238999366	0.439401714832849	0.439329048683606	0.439252242490632	0.43917129830324	0.439086218280992	0.438997004693609	0.438903659920886	0.438806186452596	0.438704586888402	0.438598863937747	0.438489020419756	0.438375059263122	0.438256983505998	0.438134796295874	0.43800850088946	0.437878100652556	0.437743599059926	0.437604999695158	0.437462306250533	0.437315522526872	0.437164652433401	0.437009699987588	0.436850669314996	0.436687564649119	0.436520390331221	0.436349150810164	0.43617385064224	0.435994494490992	0.435811087127034	0.435623633427869	0.435432138377694	0.435236607067214	0.435037044693441	0.434833456559491
0.438375059263122	0.438368844002538	0.438358485419366	0.438343983790302	0.438325339502706	0.438302553054584	0.438275625054574	0.438244556221917	0.438209347386433	0.438169999488487	0.438126513578952	0.438078890819173	0.438027132480914	0.437971239946317	0.437911214707843	0.437847058368216	0.437778772640362	0.43770635934734	0.437629820422274	0.437549157908278	0.437464373958374	0.437375470835415	0.437282450911988	0.43718531667033	0.437084070702231	0.436978715708927	0.436869254501006	0.436755689998289	0.436638025229724	0.436516263333265	0.436390407555751	0.436260461252782	0.436126427888588	0.435988311035894	0.435846114375782	0.43569984169755	0.435549496898563	0.435395083984103	0.435236607067214	0.435074070368543	0.434907478216175	0.434736835045467	0.434562145398875	0.434383413925778	0.434200645382299	0.434013844631119	0.433823016641291	0.433628166488044	0.433429299352589	0.433226420521917
0.436751560904197	0.436745367332024	0.436735044895646	0.436720593870917	0.436702014644021	0.436679307711455	0.436652473680006	0.436621513266733	0.436586427298937	0.436547216714129	0.436503882559991	0.436456425994342	0.436404848285085	0.436349150810164	0.436289335057509	0.436225402624977	0.43615735522029	0.436085194660973	0.436008922874276	0.435928541897107	0.435844053875948	0.435755461066774	0.435662765834965	0.435565970655215	0.435465078111435	0.435360090896652	0.435251011812909	0.43513784377115	0.435020589791112	0.434899253001207	0.434773836638399	0.43464434404808	0.434510778683939	0.434373144107832	0.434231443989637	0.434085682107118	0.433935862345775	0.433781988698695	0.433624065266396	0.433462096256669	0.433296085984415	0.433126038871474	0.43295195944646	0.43277385234458	0.432591722307456	0.432405574182939	0.432215412924928	0.432021243593167	0.431823071353058	0.431620901475454
0.435129614449973	0.435123442555351	0.435113156247661	0.435098755801921	0.435080241603136	0.43505761414629	0.435030874036324	0.43500002198811	0.434965058826429	0.434925985485936	0.43488280301112	0.434835512556271	0.43478411538543	0.434728612872341	0.4346690065004	0.434605297862592	0.434537488661435	0.434465580708913	0.434389575926401	0.434309476344596	0.434225284103437	0.434137001452017	0.434044630748504	0.433948174460044	0.433847635162664	0.433743015541179	0.433634318389079	0.433521546608428	0.433404703209746	0.433283791311897	0.433158814141964	0.433029775035124	0.432896677434522	0.432759524891135	0.432618321063631	0.432473069718234	0.432323774728572	0.43217044007553	0.432013069847092	0.431851668238186	0.43168623955052	0.431516788192412	0.431343318678623	0.43116583563018	0.430984343774195	0.430798847943685	0.430609353077381	0.430415864219536	0.430218386519732	0.430016925232679
0.433509245905036	0.433503095676725	0.433492845478993	0.433478495586017	0.433460046381625	0.433437498359288	0.433410852122095	0.433380108382735	0.433345267963465	0.433306331796082	0.433263300921881	0.433216176491622	0.43316495976548	0.433109652112997	0.43305025501303	0.432986770053694	0.432919198932297	0.432847543455279	0.432771805538136	0.432691987205353	0.432608090590316	0.43252011793524	0.432428071591071	0.432331954017404	0.43223176778238	0.432127515562592	0.432019200142978	0.431906824416712	0.431790391385095	0.431669904157436	0.43154536595093	0.431416780090536	0.431284150008847	0.431147479245953	0.43100677144931	0.430862030373593	0.430713259880552	0.430560463938861	0.430403646623965	0.430242812117921	0.430077964709235	0.429909108792698	0.429736248869209	0.429559389545608	0.429378535534489	0.429193691654023	0.429004862827768	0.428812054084478	0.428615270557906	0.428414517486607
0.431890481152834	0.43188435257922	0.431874138472091	0.43185983910478	0.431841454859938	0.431818986229521	0.431792433814768	0.431761798326181	0.431727080583493	0.431688281515641	0.431645402160724	0.43159844366597	0.431547407287686	0.431492294391209	0.431433106450857	0.431369845049868	0.431302511880339	0.431231108743163	0.431155637547955	0.431076100312981	0.430992499165076	0.430904836339565	0.430813114180175	0.430717335138943	0.430617501776119	0.430513616760072	0.430405682867179	0.430293702981723	0.430177680095779	0.430057617309094	0.429933517828973	0.429805384970149	0.429673222154657	0.429537032911697	0.429396820877503	0.429252589795196	0.429104343514641	0.428952085992295	0.428795821291057	0.428635553580107	0.428471287134742	0.428303026336215	0.42813077567156	0.427954539733418	0.42777432321986	0.427590130934203	0.427401967784825	0.427209838784969	0.427013749052552	0.426813703809967
0.43027334595495	0.430267239024046	0.430257060987539	0.430242812117921	0.430224492796664	0.430202103514208	0.430175644869942	0.430145117572177	0.430110522438123	0.430071860393854	0.430029132474274	0.429982339823074	0.429931483692691	0.429876565444257	0.429817586547546	0.429754548580918	0.429687453231257	0.429616302293904	0.429541097672589	0.429461841379357	0.429378535534489	0.429291182366417	0.429199784211642	0.429104343514641	0.429004862827768	0.428901344811163	0.42879379223264	0.428682207967584	0.428566594998837	0.428446956416585	0.428323295418232	0.428195615308281	0.428063919498204	0.427928211506305	0.42778849495759	0.427644773583621	0.427497051222369	0.427345331818071	0.42718961942107	0.427029918187663	0.426866232379933	0.426698566365586	0.426526924617784	0.426351311714963	0.426171732340663	0.425988191283339	0.425800693436179	0.425609243796909	0.425413847467604	0.425214509654483
0.428657865950377	0.428651780649823	0.428641638663337	0.428627440262569	0.428609185827812	0.428586875847991	0.428560510920641	0.428530091751884	0.428495619156403	0.428457094057409	0.428414517486607	0.428367890584152	0.428317214598608	0.428262490886899	0.428203720914254	0.428140906254151	0.428074048588257	0.428003149706361	0.427928211506305	0.427849235993909	0.427766225282894	0.427679181594798	0.427588107258892	0.427493004712088	0.427393876498842	0.427290725271058	0.427183553787984	0.427072364916101	0.426957161629017	0.426837947007346	0.426714724238591	0.426587496617019	0.426456267543531	0.426321040525532	0.426181819176793	0.426038607217309	0.425891408473156	0.42574022687634	0.425585066464646	0.425425931381478	0.425262825875698	0.425095754301462	0.424924721118048	0.424749730889685	0.42457078828537	0.424387898078691	0.42420106514764	0.424010294474418	0.423815591145246	0.423616960350166
0.427044066654803	0.427038002971866	0.42702789701418	0.427013749052552	0.426995559466096	0.426973328742219	0.426947057476603	0.426916746373179	0.426882396244102	0.426844008009721	0.426801582698536	0.426755121447167	0.426704625500303	0.426650096210656	0.426591535038908	0.426528943553655	0.426462323431343	0.426391676456206	0.426317004520193	0.426238309622898	0.426155593871479	0.426068859480576	0.425978108772226	0.425883344175773	0.425784568227769	0.425681783571882	0.425574992958784	0.425464199246053	0.425349405398054	0.425230614485828	0.42510782968697	0.424981054285505	0.42485029167176	0.424715545342235	0.424576818899459	0.424434116051856	0.4242874406136	0.424136796504462	0.423982187749659	0.423823618479699	0.423661092930217	0.423494615441809	0.423324190459868	0.423149822534402	0.422971516319865	0.422789276574967	0.422603108162496	0.422413016049122	0.422219005305207	0.422021081104604
0.425431973459901	0.425425931381478	0.425415861430753	0.425401763877689	0.425383639100221	0.425361487584238	0.425335309923567	0.425305106819948	0.425270879083007	0.425232627630226	0.425190353486904	0.42514405778612	0.425093741768687	0.425039406783104	0.424981054285505	0.424918685839597	0.424852303116607	0.424781907895208	0.424707502061457	0.424629087608715	0.424546666637576	0.424460241355778	0.424369814078121	0.424275387226376	0.42417696332919	0.424074545021986	0.423968135046863	0.423857736252485	0.423743351593974	0.42362498413279	0.423502637036618	0.423376313579235	0.42324601714039	0.42311175120567	0.42297351936636	0.422831325319307	0.422685172866776	0.422535065916297	0.422381008480515	0.422223004677035	0.422061058728258	0.421895174961217	0.421725357807408	0.421551611802618	0.421373941586744	0.421192351903618	0.421006847600814	0.420817433629463	0.420624115044062	0.420426897002268
0.423821611632629	0.423815591145246	0.423805557179026	0.423791510003089	0.423773449994188	0.423751377636693	0.423725293522577	0.423695198351386	0.423661092930217	0.423622978173683	0.423580855103881	0.423534724850348	0.423484588650018	0.423430447847177	0.423372303893404	0.423310158347522	0.42324401287553	0.423173869250541	0.423099729352715	0.423021595169181	0.422939468793962	0.422853352427891	0.42276324837853	0.422669159060072	0.422571086993255	0.422469034805255	0.42236300522959	0.422253001106011	0.42213902538039	0.422021081104603	0.421899171436418	0.421773299639362	0.4216434690826	0.4215096832408	0.421371945694	0.421230260127464	0.421084630331541	0.420935060201517	0.420781553737459	0.420624115044062	0.420462748330488	0.420297457910199	0.420128248200791	0.419955123723821	0.419778089104627	0.41959714907215	0.419412308458748	0.419223572200006	0.419030945334547	0.418834433003828
0.422213006314536	0.422207007404352	0.422197009399567	0.422183012568457	0.422165017286594	0.422143024036831	0.422117033409281	0.422087046101298	0.422053062917448	0.422015084769476	0.421973112676272	0.421927147763831	0.421877191265207	0.421823244520468	0.421765308976641	0.421703386187658	0.42163747781429	0.421567585624088	0.421493711491312	0.421415857396854	0.421334025428165	0.421248217779172	0.421158436750191	0.421064684747838	0.420966964284935	0.42086527798041	0.420759628559196	0.420650018852126	0.420536451795817	0.42041893043256	0.420297457910199	0.420172037482007	0.42004267250656	0.419909366447605	0.419772122873924	0.419630945459195	0.419485837981849	0.419336804324917	0.419183848475885	0.419026974526535	0.41886618667278	0.41870148921451	0.418532886555412	0.418360383202808	0.418183983767468	0.418003692963441	0.417819515607859	0.417631456620757	0.417439521024875	0.417243713945465
0.420606182521076	0.420600205173881	0.420590243106848	0.42057629658741	0.420558365989955	0.420536451795817	0.420510554593253	0.420480675077422	0.420446814050357	0.420408972420933	0.420367151204833	0.420321351524508	0.420271574609131	0.420217821794551	0.420160094523239	0.420098394344233	0.420032722913078	0.419963081991758	0.419889473448629	0.419811899258345	0.419730361501784	0.419644862365961	0.419555404143945	0.41946198923477	0.41936462014334	0.419263299480331	0.419158029962089	0.419048814410521	0.41893565575299	0.418818557022194	0.418697521356052	0.418572551997577	0.418443652294752	0.418310825700399	0.41817407577204	0.418033406171761	0.417888820666067	0.417740323125736	0.417587917525664	0.417431607944712	0.417271398565546	0.41710729367447	0.416939297661262	0.416767415019001	0.416591650343887	0.416412008335065	0.41622849379444	0.416041111626487	0.415849866838061	0.415654764538198
0.419001165140928	0.418995209342146	0.418985283188572	0.418971386946794	0.418953520990019	0.418931685798058	0.418905881957312	0.418876110160744	0.418842371207853	0.418804666004643	0.418762995563591	0.418717361003599	0.418667763549959	0.418614204534298	0.418556685394531	0.418495207674801	0.418429773025421	0.418360383202808	0.418287040069411	0.418209745593647	0.418128501849812	0.418043311018009	0.417954175384059	0.417861097339409	0.417764079381043	0.417663124111381	0.417558234238176	0.417449412574411	0.417336662038187	0.417219985652606	0.417099386545659	0.416974867950094	0.416846433203299	0.416714085747163	0.416577829127946	0.416437666996136	0.416293603106311	0.416145641316987	0.415993785590466	0.415838039992685	0.415678408693055	0.415514895964292	0.415347506182259	0.415176243825784	0.415001113476493	0.414822119818623	0.414639267638844	0.414452561826067	0.414262007371255	0.414067609367222
0.417397978935328	0.417392044670019	0.417382154405002	0.417368308406021	0.417350507045099	0.417328750800528	0.417303040256849	0.417273376104829	0.417239759141433	0.417202190269793	0.417160670499174	0.417115200944934	0.417065782828479	0.417012417477214	0.416955106324494	0.416893850909567	0.416828652877512	0.416759513979174	0.416686436071099	0.416609421115456	0.416528471179964	0.416443588437809	0.416354775167558	0.416262033753073	0.416165366683411	0.416064776552734	0.415960266060202	0.415851838009866	0.415739495310563	0.415623240975798	0.415503078123625	0.415379009976529	0.415251039861294	0.415119171208875	0.414983407554264	0.414843752536349	0.414700209897774	0.414552783484789	0.4144014772471	0.414246295237714	0.414087241612779	0.413924320631422	0.413757536655583	0.413586894149838	0.413412397681229	0.413234051919084	0.41305186163483	0.412865831701808	0.412675967095083	0.412482272891246
0.415796648537407	0.415790735790264	0.415780881388296	0.415767085596398	0.415749348785412	0.415727671432109	0.415702054119169	0.415672497535162	0.415639002474518	0.415601569837497	0.415560200630152	0.415514895964292	0.415465657057437	0.41541248523277	0.415355381919084	0.415294348650729	0.415229387067547	0.415160498914814	0.415087686043163	0.41501095040852	0.414930294072021	0.414845719199932	0.414757228063566	0.414664823039194	0.414568506607947	0.414468281355724	0.414364149973086	0.414256115255154	0.414144180101495	0.414028347516011	0.413908620606823	0.413785002586141	0.413657496770145	0.413526106578853	0.413390835535985	0.413251687268823	0.413108665508075	0.412961774087719	0.41281101694486	0.41265639811957	0.412497921754735	0.412335592095884	0.412169413491028	0.411999390390488	0.411825527346719	0.41164782901413	0.411466300148903	0.411280945608806	0.411091770352999	0.410898779441841
0.414197198451531	0.414191307206887	0.414181488641852	0.414167743020478	0.414150070712423	0.414128472192934	0.414102948042832	0.41407349894849	0.4140401257018	0.414002829200149	0.413961610446377	0.413916470548746	0.413867410720885	0.413814432281754	0.413757536655583	0.413696725371822	0.413632000065076	0.413563362475046	0.413490814446455	0.41341435792898	0.413333994977172	0.413249727750378	0.413161558512652	0.413069489632671	0.412973523583637	0.412873662943184	0.412769910393272	0.412662268720086	0.412550740813924	0.412435329669081	0.412316038383737	0.412192870159829	0.412065828302928	0.41193491622211	0.411800137429819	0.411661495541729	0.411518994276606	0.411372637456154	0.411222429004872	0.411068372949895	0.410910473420838	0.410748734649629	0.41058316097035	0.410413756819058	0.410240526733616	0.410063475353513	0.409882607419679	0.409697927774302	0.409509441360634	0.409317153222799
0.412599653052656	0.412593783294481	0.412584000539664	0.41257030505141	0.412552697198193	0.412531177453739	0.412505746397008	0.412476404712173	0.41244315318859	0.41240599272077	0.412364924308342	0.412319949056014	0.41227106817353	0.41221828297562	0.412161594881951	0.412101005417073	0.412036516210351	0.411968128995909	0.411895845612559	0.411819668003726	0.411739598217375	0.411655638405929	0.411567790826183	0.411476057839218	0.411380441910304	0.411280945608806	0.411177571608083	0.411070322685379	0.410959201721719	0.410844211701789	0.410725355713827	0.41060263694949	0.41047605870374	0.410345624374706	0.410211337463552	0.410073201574342	0.409931220413895	0.409785397791638	0.40963573761946	0.409482243911554	0.409324920784261	0.409163772455905	0.408998803246631	0.408830017578231	0.408657419973972	0.408481015058416	0.408300807557239	0.408116802297043	0.407929004205169	0.407737418309498
0.411004036585692	0.410998188297595	0.410988441325678	0.410974795932299	0.410957252484748	0.410935811455228	0.410910473420838	0.41088123906355	0.410848109170184	0.410811084632375	0.410770166446537	0.410725355713827	0.410676653640097	0.410624061535851	0.410567580816192	0.410507213000763	0.410442959713692	0.410374822683524	0.410302803743155	0.410226904829759	0.410147127984713	0.410063475353513	0.409975949185693	0.409884551834734	0.409789285757974	0.409690153516507	0.409587157775085	0.409480301302012	0.409369586969034	0.40925501775123	0.409136596726887	0.409014327077384	0.408888212087067	0.408758255143117	0.408624459735415	0.40848682945641	0.408345368000971	0.408200079166246	0.408050966851509	0.407898035058007	0.407741287888804	0.407580729548616	0.407416364343648	0.407248196681422	0.407076231070604	0.406900472120826	0.406720924542504	0.406537593146654	0.406350482844697	0.406159598648271
0.409410373164865	0.409404546330096	0.409394835113162	0.409381239775576	0.40936376068344	0.409342398307435	0.409317153222799	0.409288026109304	0.40925501775123	0.409218129037336	0.409177360960821	0.409132714619288	0.4090841912147	0.409031792053331	0.408975518545717	0.408915372206596	0.408851354654855	0.40878346761346	0.408711712909389	0.408636092473563	0.408556608340767	0.408473262649572	0.408386057642246	0.408294995664671	0.408200079166246	0.408101310699795	0.40799869292146	0.407892228590602	0.407781920569689	0.407667771824182	0.407549785422422	0.407427964535505	0.407302312437157	0.407172832503608	0.407039528213455	0.406902403147526	0.406761460988741	0.40661670552196	0.406468140633842	0.406315770312685	0.406159598648271	0.405999629831705	0.405835868155248	0.405668318012149	0.405496983896469	0.405321870402907	0.405142982226615	0.404960324163016	0.404773901107611	0.404583718055788
0.407818686773098	0.40781288137455	0.407803205884086	0.407789660562373	0.407772245774327	0.407750961989107	0.407725809780087	0.407696789824838	0.407663902905102	0.407627149906761	0.407586531819796	0.407542049738258	0.407493704860217	0.407441498487717	0.407385432026726	0.407325506987076	0.407261724982411	0.407194087730115	0.407122597051249	0.407047254870479	0.406968063215997	0.406885024219443	0.406798140115822	0.406707413243411	0.406612846043672	0.406514441061153	0.406412200943387	0.406306128440787	0.40619622640654	0.406082497796491	0.40596494566903	0.405843573184964	0.405718383607402	0.405589380301617	0.405456566734919	0.405319946476514	0.405179523197366	0.40503530067005	0.404887282768603	0.404735473468371	0.404579876845852	0.404420497078536	0.404257338444736	0.404090405323425	0.403919702194057	0.403745233636392	0.403567004330316	0.403385019055655	0.403199282691986	0.403009800218444
0.406229001261393	0.406223217281601	0.406213577488499	0.406200082141907	0.406182731605557	0.406161526347082	0.406136466937993	0.406107554053662	0.40607478847329	0.406038171079879	0.405997702860196	0.405953384904736	0.405905218407676	0.405853204666828	0.405797345083591	0.405737641162892	0.405674094513128	0.405606706846102	0.405535479976956	0.405460415824096	0.405381516409123	0.405298783856745	0.405212220394698	0.405121828353656	0.405027610167142	0.404929568371424	0.404827705605424	0.404722024610607	0.404612528230875	0.404499219412456	0.404382101203783	0.404261176755378	0.404136449319724	0.40400792225114	0.403875599005642	0.403739483140814	0.403599578315661	0.403455888290468	0.403308416926649	0.403157168186594	0.403002146133517	0.402843354931285	0.402680798844266	0.402514482237149	0.402344409574778	0.402170585421974	0.401993014443351	0.401811701403136	0.401626651164977	0.401437868691754
0.404641340348223	0.404635577769367	0.404625973643927	0.404612528230875	0.404595241892759	0.404574115095686	0.404549148409305	0.404520342506784	0.404487698164786	0.404451216263434	0.404410897786276	0.404366743820252	0.404318755555645	0.404266934286036	0.404211281408252	0.404151798422313	0.40408848693137	0.404021348641642	0.403950385362349	0.403875599005642	0.403796991586523	0.403714565222769	0.403628322134846	0.403538264645824	0.40344439518128	0.403346716269206	0.403245230539909	0.403139940725904	0.403030849661808	0.402917960284225	0.402801275631634	0.402680798844266	0.402556533163979	0.402428481934131	0.402296648599448	0.402161036705884	0.402021649900485	0.401878491931244	0.401731566646948	0.401580877997031	0.401426430031413	0.401268226900346	0.40110627285424	0.400940572243504	0.400771129518367	0.400597949228706	0.400421036023863	0.400240394652462	0.400056029962221	0.399867946899757
0.403055727618935	0.40304998642284	0.40304041793477	0.403027022412851	0.403009800218444	0.402988751816131	0.402963877773698	0.402935178762111	0.402902655555491	0.402866309031081	0.402826140169213	0.40278215005327	0.402734339869639	0.402682710907668	0.402627264559614	0.402568002320588	0.402504925788492	0.402438036663963	0.402367336750297	0.402292827953385	0.402214512281634	0.402132391845885	0.402046468859335	0.401956745637445	0.401863224597849	0.401765908260258	0.401664799246363	0.401559900279727	0.401451214185679	0.401338743891201	0.401222492424813	0.401102462916454	0.400978658597354	0.40085108279991	0.400719738957551	0.400584630604605	0.400445761376154	0.400303135007894	0.400156755335987	0.400006626296905	0.399852751927278	0.39969513636373	0.39953378384272	0.399368698700369	0.399199885372292	0.399027348393417	0.398851092397811	0.398671122118493	0.398487442387247	0.398300058134428
0.401472186525153	0.401466466693292	0.401456933811713	0.401443588137696	0.401426430031413	0.401405459955924	0.40138067847715	0.401352086263855	0.401319684087617	0.4012834728228	0.401243453446517	0.401199627038593	0.401151994781521	0.401100557960415	0.401045317962959	0.400986276279354	0.400923434502256	0.400856794326713	0.400786357550101	0.400712126072048	0.400634101894362	0.400552287120952	0.40046668395774	0.40037729471258	0.400284121795159	0.400187167716907	0.400086435090898	0.39998192663174	0.399873645155472	0.399761593579454	0.399645774922244	0.399526192303487	0.399402848943785	0.39927574816457	0.399144893387975	0.399010288136695	0.398871936033849	0.398729840802836	0.398584006267188	0.398434436350413	0.398281135075847	0.398124106566491	0.397963355044843	0.397798884832737	0.39763070035117	0.397458806120121	0.397283206758379	0.397103906983356	0.396920911610898	0.396734225555096
0.399890740384199	0.399885041897692	0.399875544591139	0.399862248720971	0.399845154646176	0.399824262828286	0.399799573831358	0.399771088321954	0.39973880706911	0.399702730944309	0.399662860921445	0.399619198076786	0.399571743588927	0.399520498738749	0.399465464909363	0.399406643586058	0.399344036356242	0.399277644909377	0.399207471036914	0.399133516632219	0.399055783690501	0.398974274308732	0.398888990685562	0.398799935121233	0.398707110017487	0.398610517877472	0.398510161305638	0.398406043007643	0.398298165790233	0.39818653256114	0.398071146328965	0.397952010203054	0.397829127393378	0.397702501210405	0.397572135064968	0.39743803246813	0.397300197031045	0.397158632464811	0.397013342580327	0.396864331288139	0.396711602598287	0.396555160620141	0.396395009562243	0.396231153732136	0.396063597536196	0.395892345479451	0.395717402165411	0.395538772295876	0.395356460670755	0.395170472187874
0.398311412378515	0.398305735218133	0.398296273454556	0.398283027343368	0.39826599724237	0.398245183611569	0.398220587013157	0.398192208111493	0.39816004767307	0.39812410656649	0.398084385762429	0.398040886333594	0.397993609454685	0.397942556402348	0.397887728555119	0.397829127393378	0.397766754499281	0.397700611556703	0.397630700351169	0.397557022769785	0.397479580801158	0.397398376535323	0.397313412163655	0.397224689978785	0.397132212374508	0.397035981845686	0.396936000988151	0.396832272498601	0.396724799174494	0.396613583913933	0.396498629715555	0.39637993967841	0.396257517001836	0.396131364985335	0.39600148702844	0.395867886630578	0.395730567390936	0.395589533008312	0.39544478728097	0.395296334106493	0.395144177481619	0.394988321502091	0.39482877036249	0.394665528356067	0.394498599874573	0.394327989408089	0.394153701544838	0.393975740971011	0.393794112470576	0.39360882092509
0.396734225555097	0.396728569701261	0.396719143448029	0.396705947050137	0.3966889808642	0.396668245348698	0.39664374106396	0.396615468672138	0.396583428937186	0.396547622724824	0.396508051002505	0.39646471483938	0.396417615406252	0.396366753975529	0.396312131921176	0.396253750718657	0.396191611944881	0.396125717278133	0.396056068498014	0.395982667485363	0.39590551622219	0.395824616791588	0.39573997137766	0.395651582265423	0.395559451840722	0.395463582590137	0.395363977100876	0.395260638060681	0.395153568257716	0.395042770580456	0.394928248017574	0.39481000365782	0.3946880406899	0.394562362402348	0.394432972183395	0.394299873520833	0.394163070001878	0.394022565313028	0.393878363239912	0.393730467667144	0.393578882578165	0.393423612055086	0.393264660278524	0.393102031527439	0.392935730178958	0.392765760708207	0.392592127688126	0.392414835789293	0.392233889779735	0.392049294524737
0.395159202824932	0.395153568257716	0.395144177481619	0.395131030750528	0.395114128419872	0.395093470946605	0.39506905888919	0.395040892907578	0.395008973763177	0.394973302318826	0.394933879538758	0.394890706488566	0.394843784335153	0.394793114346692	0.394738697892573	0.394680536443348	0.394618631570675	0.39455298494725	0.394483598346747	0.394410473643742	0.394333612813642	0.394253017932602	0.394168691177447	0.394080634825583	0.393988851254906	0.393893342943708	0.393794112470576	0.393691162514293	0.393584495853729	0.39347411536773	0.393360024035003	0.393242224933999	0.393120721242791	0.392995516238942	0.39286661329938	0.392734015900261	0.392597727616833	0.392457752123288	0.39231409319262	0.392166754696475	0.392015740604993	0.391861054986652	0.391702702008108	0.391540685934025	0.391375011126905	0.391205682046919	0.391032703251723	0.39085607939628	0.390675815232674	0.39049191560992
0.393586366962454	0.393580753661585	0.393571398328834	0.393558301217241	0.393541462681047	0.393520883175681	0.393496563257741	0.393468503584972	0.393436704916239	0.393401168111502	0.393361894131771	0.393318884039078	0.393272138996431	0.393221660267766	0.393167449217896	0.393109507312462	0.393047836117869	0.392982437301225	0.392913312630276	0.392840463973334	0.392763893299202	0.392683602677098	0.39259959427657	0.392511870367409	0.392420433319561	0.392325285603031	0.392226429787785	0.392123868543645	0.392017604640186	0.391907640946624	0.391793980431702	0.39167662616357	0.391555581309663	0.391430849136578	0.391302433009937	0.391170336394261	0.391034562852824	0.390895116047515	0.390751999738693	0.390605217785032	0.390454774143373	0.39030067286856	0.390142918113284	0.389981514127915	0.389816465260328	0.389647775955739	0.389475450756518	0.389299494302014	0.389119911328367	0.388936706668318
0.392015740604993	0.392010148549853	0.392000828626086	0.391987781085883	0.391971006282298	0.391950504669234	0.391926276801423	0.391898323334407	0.391866645024508	0.391831242728801	0.391792117405078	0.391749270111811	0.391702702008108	0.391652414353669	0.391598408508732	0.391540685934025	0.3914792481907	0.391414096940276	0.391345233944571	0.391272661065633	0.391196380265661	0.391116393606934	0.391032703251723	0.390945311462204	0.390854220600373	0.390759433127947	0.390660951606268	0.3905587786962	0.390452917158023	0.390343369851321	0.39023013973487	0.39011322986652	0.389992643403071	0.389868383600148	0.38974045381207	0.38960885749172	0.389473598190399	0.389334679557694	0.389192105341324	0.389045879386994	0.388896005638243	0.388742488136283	0.388585331019838	0.388424538524982	0.388260114984967	0.388092064830048	0.387920392587312	0.387745102880491	0.38756620042978	0.387383690051651
0.390447346252245	0.390441775421873	0.390432490872154	0.390419492854431	0.390402781720571	0.390382357922951	0.390358222014437	0.390330374648366	0.390298816578518	0.390263548659085	0.390224571844638	0.390181887190089	0.390135495850647	0.390085399081775	0.390031598239137	0.389974094778546	0.389912890255902	0.389847986327134	0.389779384748134	0.389707087374682	0.389631096162376	0.389551413166553	0.389468040542207	0.389380980543901	0.389290235525679	0.38919580794097	0.389097700342493	0.388995915382151	0.388890455810929	0.388781324478779	0.388668524334512	0.388552058425676	0.388431929898433	0.38830814199744	0.388180698065711	0.388049601544488	0.387914855973104	0.387776464988837	0.387634432326771	0.387488761819641	0.387339457397682	0.387186523088473	0.387029963016773	0.386869781404359	0.386705982569857	0.386538570928565	0.386367550992284	0.38619292736913	0.386014704763355	0.385832887975156
0.388881206265746	0.388875656638839	0.388866407427662	0.388853458882711	0.388836811354666	0.388816465294375	0.388792421252843	0.388764679881199	0.388733241930681	0.388698108252599	0.388659279798301	0.38861675761914	0.388570542866428	0.388520636791388	0.38846704074511	0.388409756178492	0.388348784642183	0.388284127786522	0.388215787361473	0.388143765216549	0.388068063300747	0.387988683662462	0.387905628449411	0.387818899908542	0.387728500385948	0.387634432326771	0.387536698275105	0.387435300873893	0.387330242864823	0.387221527088218	0.387109156482921	0.386993134086178	0.386873463033516	0.38675014655862	0.386623187993199	0.386492590766859	0.386358358406957	0.38622049453847	0.386079002883841	0.385933887262836	0.385785151592388	0.385632799886441	0.38547683625579	0.385317264907916	0.385154090146817	0.384987316372835	0.384816948082485	0.384642989868266	0.384465446418488	0.384284322517073
0.387317342868351	0.387311814423264	0.387302600514556	0.387289701391874	0.38727311740471	0.387252849002388	0.387228896734044	0.387201261248607	0.387169943294768	0.387134943720955	0.387096263475296	0.387053903605583	0.387007865259229	0.386958149683222	0.386904758224074	0.38684769232777	0.386786953539707	0.386722543504634	0.386654463966585	0.386582716768811	0.386507303853703	0.386428227262717	0.386345489136291	0.386259091713759	0.386169037333263	0.386075328431657	0.38597796754441	0.385876957305507	0.38577230044734	0.385663999800598	0.38555205829416	0.385436478954969	0.385317264907916	0.385194419375715	0.385067945678772	0.384937847235052	0.384804127559943	0.384666790266115	0.384525839063374	0.384381277758515	0.38423311025517	0.384081340553649	0.383925972750782	0.383767011039754	0.383604459709936	0.383438323146716	0.383268605831319	0.383095312340633	0.382918447347021	0.382738015618135
0.385755778143728	0.385750270858478	0.385741092215598	0.38572824246389	0.385711721951656	0.385691531126696	0.38566767053628	0.38564014082713	0.385608942745396	0.385574077136623	0.385535544945719	0.385493347216914	0.385447485093723	0.385397959818897	0.385344772734372	0.38528792528122	0.385227418999585	0.385163255528627	0.385095436606451	0.385023964070043	0.384948839855192	0.384870065996411	0.384787644626862	0.384701577978266	0.384611868380811	0.384518518263065	0.384421530151874	0.384320906672261	0.384216650547322	0.384108764598118	0.383997251743558	0.383882115000286	0.383763357482557	0.383640982402114	0.383514993068058	0.383385392886716	0.383252185361506	0.383115374092791	0.382974962777742	0.382830955210183	0.382683355280445	0.382532166975205	0.382377394377327	0.382219041665702	0.382057113115075	0.381891613095878	0.381722546074052	0.381549916610869	0.381373729362749	0.381193989081072
0.384196534035851	0.384191047888117	0.384181904473864	0.384169104041045	0.384152646936778	0.384132533607334	0.384108764598118	0.384081340553649	0.384050262217533	0.384015530432432	0.383977146140032	0.383935110381006	0.383889424294969	0.383840089120433	0.383787106194762	0.383730476954112	0.383670202933376	0.383606285766123	0.383538727184533	0.383467529019323	0.383392693199681	0.383314221753181	0.383232116805707	0.383146380581364	0.383057015402391	0.382964023689068	0.382867407959617	0.382767170830103	0.382663315014326	0.382555843323716	0.382444758667216	0.382330064051168	0.382211762579194	0.382089857452065	0.381964351967579	0.381835249520426	0.381702553602051	0.381566267800516	0.381426395800353	0.381282941382419	0.381135908423742	0.380985300897368	0.380831122872196	0.380673378512824	0.380512072079371	0.380347207927316	0.380178790507313	0.380006824365022	0.379831314140921	0.37965226457012
0.382639632348515	0.382634167315638	0.382625059092248	0.382612307925451	0.382595914161176	0.382575878244169	0.38255220071797	0.382524882224893	0.382493923506001	0.382459325401073	0.382421088848576	0.38237921488562	0.382333704647924	0.382284559369765	0.382231780383928	0.382175369121657	0.382115327112594	0.382051655984718	0.381984357464281	0.381913433375737	0.381838885641669	0.381760716282713	0.381678927417474	0.381593521262446	0.381504500131916	0.381411866437878	0.38131562268993	0.381215771495178	0.381112315558129	0.38100525768058	0.38089460076151	0.380780347796962	0.380662501879921	0.380541066200191	0.380416044044266	0.380287438795199	0.380155253932465	0.380019493031822	0.379880159765168	0.37973725790039	0.379590791301219	0.379440763927066	0.379287179832871	0.379130043168935	0.378969358180756	0.378805129208858	0.378637360688613	0.378466057150069	0.378291223217761	0.378112863610533
0.381085094744844	0.381079650803831	0.381070577732983	0.381057875778557	0.381041545285296	0.381021586696419	0.380998000553601	0.380970787496952	0.380939948264992	0.380905483694618	0.380867394721076	0.380825682377918	0.380780347796962	0.38073139220825	0.380678816939994	0.380622623418522	0.380562813168226	0.380499387811496	0.380432349068656	0.380361698757897	0.380287438795199	0.380209571194258	0.380128098066405	0.380043021620519	0.379954344162938	0.379862068097369	0.379766195924789	0.379666730243344	0.379563673748248	0.379457029231668	0.37934679958262	0.379232987786846	0.379115596926698	0.378994630181011	0.378870090824977	0.378741982230014	0.378610307863627	0.378475071289274	0.378336276166216	0.378193926249375	0.378048025389181	0.377898577531417	0.377745586717061	0.377589057082123	0.377428992857478	0.377265398368696	0.377098278035871	0.376927636373438	0.376753477989995	0.376575807588116
0.379532942746819	0.379527519874343	0.379518481917159	0.379505829120676	0.379489561828449	0.379469680482172	0.379446185621655	0.379419077884803	0.379388358007594	0.379354026824044	0.379316085266177	0.379274534363986	0.379229375245393	0.379180609136201	0.379128237360049	0.379072261338354	0.379012682590255	0.378949502732554	0.378882723479649	0.378812346643466	0.378738374133385	0.378660807956163	0.378579650215855	0.378494903113727	0.37840656894817	0.378314650114603	0.378219149105383	0.378120068509699	0.37801741101347	0.377911179399237	0.377801376546051	0.377688005429356	0.377571069120871	0.377450570788465	0.377326513696028	0.377198901203343	0.377067736765949	0.376933023935002	0.37679476635713	0.376652967774291	0.376507632023616	0.37635876303726	0.376206364842242	0.376050441560281	0.375890997407632	0.375728036694916	0.375561563826944	0.375391583302545	0.375218099714379	0.375041117748756
0.377983197734809	0.377977795907212	0.377968793024261	0.377956189330517	0.377939985168349	0.377920180977925	0.377896777297189	0.377869774761844	0.377839174105324	0.377804976158764	0.377767181850968	0.377725792208371	0.377680808354997	0.377632231512413	0.377580062999685	0.377524304233316	0.377464956727196	0.37740202209254	0.377335502037819	0.377265398368696	0.377191712987951	0.377114447895402	0.377033605187829	0.376949187058889	0.376861195799021	0.376769633795364	0.376674503531651	0.376575807588116	0.376473548641386	0.376367729464375	0.376258352926172	0.376145421991923	0.376028939722716	0.375908909275453	0.375785333902727	0.375658216952687	0.375527561868905	0.375393372190239	0.375255651550685	0.375114403679236	0.374969632399731	0.374821341630696	0.374669535385192	0.37451421777065	0.374355392988708	0.374193065335036	0.374027239199171	0.373857919064333	0.373685109507248	0.373508815197963
0.376435880947111	0.376430500140404	0.376421532291704	0.376408977644725	0.376392836540649	0.376373109418118	0.376349796813213	0.376322899359432	0.376292417787666	0.376258352926172	0.376220705700531	0.376179477133621	0.376134668345569	0.376086280553709	0.37603431507253	0.375978773313626	0.375919656785637	0.375856967094191	0.375790705941833	0.375720875127965	0.375647476548765	0.375570512197116	0.375489984162525	0.375405894631036	0.375318245885143	0.375227040303701	0.375132280361823	0.375033968630789	0.374932107777935	0.374826700566549	0.374717749855759	0.374605258600416	0.374489229850977	0.374369666753382	0.374246572548924	0.374119950574121	0.373989804260582	0.373856137134865	0.37371895281834	0.373578255027037	0.3734340475715	0.373286334356632	0.373135119381538	0.372980406739364	0.372822200617129	0.372660505295561	0.372495325148919	0.372326664644821	0.372154528344061	0.371978920900425
0.374891013479503	0.374885653669366	0.374876720814388	0.374864215157431	0.374848137038493	0.37482848689469	0.374805265260238	0.374778472766433	0.374748110141624	0.374714178211186	0.374676677897482	0.374635610219833	0.374590976294468	0.374542777334487	0.374491014649806	0.37443568964711	0.374376803829789	0.374314358797884	0.374248356248018	0.374178797973329	0.374105685863398	0.374029021904172	0.373948808177884	0.37386504686297	0.373777740233979	0.373686890661481	0.373592500611975	0.373494572647785	0.373393109426957	0.373288113703157	0.373179588325552	0.3730675362387	0.372951960482429	0.372832864191717	0.372710250596562	0.372584123021852	0.372454484887232	0.372321339706968	0.3721846910898	0.3720445427388	0.37190089845122	0.371753762118342	0.371603137725317	0.371449029351007	0.371291441167819	0.371130377441537	0.370965842531148	0.370797840888668	0.370626377058963	0.370451455679562
0.373348616284795	0.373343277446585	0.37333437954425	0.37332192281981	0.373305907612073	0.373286334356632	0.373263203585837	0.373236515928783	0.373206272111278	0.373172472955814	0.373135119381538	0.373094212404212	0.373049753136171	0.37300174278628	0.372950182659885	0.372895074158758	0.372836418781045	0.372774218121198	0.372708473869918	0.372639187814084	0.372566361836679	0.372489997916714	0.372410098129153	0.372326664644821	0.372239699730324	0.372149205747953	0.372055185155588	0.371957640506602	0.371856574449755	0.371751989729088	0.371643889183812	0.371532275748192	0.371417152451431	0.371298522417546	0.371176388865241	0.371050755107777	0.37092162455284	0.370789000702401	0.370652887152577	0.370513287593481	0.370370205809078	0.37022364567703	0.370073611168538	0.369920106348184	0.369763135373762	0.369602702496117	0.369438812058968	0.369271468498733	0.369100676344351	0.368926440217099
0.371808710172403	0.371803392281147	0.371794529289837	0.371782121439646	0.371766169068197	0.371746672609555	0.371723632594211	0.371697049649053	0.37166692449735	0.371633257958715	0.371596050949077	0.37155530448064	0.371511019661845	0.371463197697325	0.371411839887854	0.371356947630295	0.371298522417546	0.371236565838477	0.371171079577867	0.371102065416334	0.371029525230264	0.370953460991739	0.370873874768448	0.370790768723613	0.370704145115896	0.370614006299309	0.370520354723117	0.370423192931743	0.370322523564662	0.370218349356293	0.370110673135893	0.369999497827436	0.369884826449502	0.369766662115149	0.369645008031789	0.36951986750106	0.369391243918689	0.369259140774357	0.369123561651559	0.368984510227453	0.36884199027272	0.368696005651403	0.368546560320757	0.368393658331086	0.368237303825578	0.36807750104014	0.367914254303225	0.367747568035656	0.367577446750452	0.367403895052638
0.370271315807918	0.37026601883832	0.370257190715876	0.370244831680909	0.370228942069859	0.370209522315267	0.370186572945758	0.370160094586021	0.370130087956783	0.370096553874778	0.370059493252717	0.370018907099249	0.369974796518922	0.369927162712135	0.369876006975093	0.369821330699751	0.369763135373762	0.369701422580412	0.369636193998558	0.369567451402562	0.369495196662215	0.369419431742666	0.369340158704338	0.369257379702845	0.36917109698891	0.369081312908267	0.368988029901569	0.368891250504291	0.368790977346622	0.368687213153365	0.368579960743822	0.368469223031681	0.368355003024899	0.368237303825578	0.368116128629843	0.367991480727708	0.367863363502946	0.367731780432951	0.367596735088596	0.367458231134092	0.367316272326833	0.367170862517252	0.367022005648659	0.366869705757082	0.366713966971107	0.366554793511707	0.366392189692073	0.366226159917439	0.366056708684903	0.365883840583245
0.368736453712694	0.368731177639134	0.368722384342856	0.368710074063338	0.368694247135831	0.368674903991354	0.368652045156668	0.368625671254261	0.36859578300232	0.368562381214701	0.368525466800899	0.368485040766007	0.36844110421068	0.368393658331086	0.368342704418861	0.368288243861053	0.368230278140071	0.368168808833618	0.368103837614633	0.368035366251222	0.367963396606581	0.36788793063893	0.367808970401424	0.367726518042076	0.367640575803668	0.367551146023659	0.367458231134092	0.367361833661494	0.367261956226776	0.367158601545122	0.367051772425884	0.366941471772465	0.366827702582202	0.366710467946246	0.366589771049433	0.366465615170161	0.366338003680248	0.366206940044805	0.366072427822089	0.365934470663362	0.36579307231274	0.365648236607045	0.365499967475647	0.365348268940304	0.365193145115	0.365034600205781	0.364872638510578	0.364707264419039	0.364538482412348	0.364366297063044
0.367204144263434	0.367198889059972	0.367190130546628	0.36717786896203	0.367162104640247	0.367142838010771	0.367120069598504	0.367093800023731	0.3670640300021	0.36703076034459	0.36699399195748	0.366953725842308	0.366909963095838	0.366862704910007	0.366811952571884	0.366757707463612	0.366699971062354	0.366638744940235	0.366574030764277	0.366505830296327	0.366434145392995	0.366358978005567	0.366280330179937	0.366198204056516	0.366112601870147	0.366023525950018	0.365930978719564	0.365834962696366	0.365735480492056	0.365632534812206	0.365526128456219	0.365416264317215	0.365302945381916	0.365186174730521	0.365065955536585	0.364942291066887	0.364815184681299	0.36468463983265	0.364550660066583	0.364413249021417	0.364272410427992	0.364128148109523	0.363980465981444	0.363829368051246	0.363674858418318	0.363516941273778	0.363355620900306	0.363190901671968	0.363022788054036	0.362851284602814
0.365674407691797	0.365669173332174	0.365660449557996	0.365648236607045	0.365632534812206	0.365613344601448	0.36559066649781	0.365564501119376	0.365534849179257	0.365501711485555	0.365465088941332	0.365424982544576	0.365381393388157	0.365334322659785	0.365283771641962	0.365229741711926	0.365172234341599	0.365111251097527	0.365046793640814	0.364978863727057	0.364907463206273	0.364832594022825	0.36475425821534	0.364672457916633	0.364587195353611	0.364498472847191	0.364406292812202	0.364310657757284	0.364211570284792	0.364109033090687	0.364003048964427	0.363893620788852	0.36378075154007	0.363664444287335	0.36354470219292	0.363421528511993	0.363294926592479	0.363164899874929	0.36303145189238	0.362894586270206	0.362754306725978	0.362610617069309	0.362463521201698	0.362313023116376	0.362159126898139	0.362001836723185	0.361841156858944	0.361677091663904	0.361509645587435	0.361338823169606
0.364147264084005	0.364142050541642	0.364133361462333	0.364121197083015	0.364105557735386	0.364086443845894	0.364063855935716	0.364037794620737	0.36400826061153	0.363975254713319	0.363938777825955	0.363898830943871	0.36385541515605	0.363808531645972	0.363758181691574	0.363704366665192	0.363647088033507	0.363586347357488	0.363522146292325	0.363454486587363	0.36338337008603	0.363308798725766	0.363230774537938	0.363149299647762	0.363064376274214	0.362976006729943	0.362884193421171	0.362788938847603	0.36269024560232	0.362588116371673	0.362482553935178	0.362373561165399	0.362261141027834	0.362145296580793	0.362026030975273	0.361903347454831	0.361777249355453	0.361647740105415	0.361514823225147	0.361378502327088	0.361238781115542	0.361095663386522	0.360949153027601	0.36079925401775	0.360645970427179	0.36048930641717	0.360329266239908	0.36016585423831	0.359999074845844	0.359828932586354
0.362622733380458	0.36261754062846	0.362608886199196	0.362596770328756	0.362581193347656	0.362562155680818	0.36253965784756	0.36251370046157	0.36248428423088	0.362451409957842	0.362415078539092	0.362375290965514	0.3623320483222	0.362285351788405	0.362235202637501	0.362181602236923	0.362124552048115	0.362064053626469	0.362000108621262	0.36193271877559	0.361861885926296	0.361787612003896	0.361709899032499	0.361628749129727	0.361544164506626	0.361456147467578	0.361364700410207	0.361269825825279	0.361171526296605	0.361069804500932	0.360964663207836	0.360856105279608	0.360744133671139	0.360628751429799	0.360509961695312	0.36038776769963	0.360262172766799	0.360133180312828	0.360000793845546	0.359865016964458	0.359725853360604	0.359583306816406	0.35943738120551	0.359288080492637	0.359135408733414	0.358979370074211	0.358819968751976	0.358657209094056	0.358491095518027	0.35832163253151
0.361100835375365	0.361095663386522	0.361087043561953	0.361074976136903	0.361059461440703	0.361040499896754	0.361018092022513	0.360992238429469	0.360962939823119	0.360930197002941	0.360894010862359	0.360854382388705	0.360811312663186	0.360764802860832	0.360714854250451	0.360661468194579	0.360604646149422	0.3605443896648	0.360480700384078	0.360413580044106	0.360343030475142	0.360269053600783	0.360191651437881	0.360110826096467	0.360026579779658	0.359938914783575	0.359847833497242	0.359753338402494	0.359655432073873	0.359554117178524	0.359449396476088	0.359341272818587	0.359229749150308	0.359114828507683	0.35899651401917	0.358874808905117	0.358749716477638	0.358621240140476	0.358489383388862	0.358354149809375	0.358215543079795	0.358073566968955	0.357928225336585	0.357779522133155	0.357627461399715	0.357472047267732	0.357313283958917	0.357151175785058	0.356985727147841	0.356816942538673
0.359581589716375	0.359576438463165	0.35956785319742	0.35955583415354	0.359540381659672	0.359521496137697	0.359499178103211	0.359473428165507	0.359444247027545	0.359411635485931	0.359375594430877	0.359336124846168	0.359293227809123	0.359246904490549	0.359197156154694	0.359143984159195	0.359087389955024	0.359027375086428	0.358963941190864	0.358897089998936	0.358826823334323	0.358753143113701	0.358676051346671	0.358595550135674	0.358511641675902	0.358424328255216	0.358333612254046	0.358239496145296	0.358141982494245	0.358041073958439	0.357936773287586	0.357829083323442	0.357718006999695	0.357603547341846	0.357485707467086	0.357364490584167	0.357239899993274	0.357111939085887	0.356980611344646	0.356845920343207	0.356707869746097	0.356566463308564	0.356421704876425	0.356273598385908	0.356122147863491	0.355967357425739	0.355809231279138	0.35564777371992	0.355482989133887	0.355314881996238
[truncated: 558 more rows]
[truncated: 950 more columns]
