# Supplementary material
Source: ML conference proceedings conference paper supplement (https://proceedings.neurips.cc/paper_files/paper/2021/hash/0919b5c38396c3f0c41f1112d538e42c-Abstract.html)
Supplement: Supplementary file 1 [file 0919b5c38396c3f0c41f1112d538e42c-Supplemental.zip › supplementary material/ICE/simulation/SAS_SBA/sort_and_smooth.m]

function west = sort_and_smooth(G)
[M0 N0] = size(G);
n = M0;
h = round(log(n));

% Empirical Degree Sorting
d = mean(G);
[~, pos] = sort(d, 'descend');
A = G(pos, pos);

% Histogram
H = imfilter(A, ones(h)/h^2, 'symmetric');
H = H(1:h:end, 1:h:end);

% TV
opts.beta = [1 1 0];
opts.print = false;
opts.method = 'l2';
[M N] = size(H);
M2 = round(M/2);
N2 = round(N/2);
Hpad = padarray(H, [M2 N2], 'symmetric');

out = deconvtv(Hpad, 1, 7.5, opts);
what = out.f;
what = what(M2+1:end-M2, N2+1:end-N2);

west = imresize(what, [M0, N0], 'nearest');
